# Supplementary material for: SSNA1 stabilizes dynamic microtubules and detects microtubule damage
Source: eLife journal article supplement (doi:10.7554/elife.67282), 2021-12-31
Supplement: supp [file elife-67282-supp-v1.zip]

Archive with 23 entries (23 files):
- elife_poa_e67282_Figure_1_figure_supplement_1.pdf
- elife_poa_e67282_Figure_1_figure_supplement_2.pdf
- elife_poa_e67282_Figure_2_figure_supplement_1.pdf
- elife_poa_e67282_Figure_2_figure_supplement_2.pdf
- elife_poa_e67282_Figure_3_figure_supplement_1.pdf
- elife_poa_e67282_Figure_4_figure_supplement_1.pdf
- elife_poa_e67282_Figure_5_figure_supplement_1.pdf
- elife_poa_e67282_Figure_5_figure_supplement_2.pdf
- elife_poa_e67282_Figure_6_figure_supplement_1.pdf
- elife_poa_e67282_Video_1.mp4
- elife_poa_e67282_Video_2.mp4
- elife_poa_e67282_Video_3.mp4
- elife_poa_e67282_Video_4.mp4
- elife_poa_e67282_Video_5.mp4
- elife_poa_e67282_Video_6.mp4
- elife_poa_e67282_Figure_4_video_1.mp4
- elife_poa_e67282_Transparent_Reporting_File.pdf
- elife_poa_e67282_Figure_1_source_data_1.xlsx
- elife_poa_e67282_Figure_2_source_data_1.xlsx
- elife_poa_e67282_Figure_3_source_data_1.xlsx
- elife_poa_e67282_Figure_4_source_data_1.xlsx
- elife_poa_e67282_Figure_5_source_data_1.xlsx
- elife_poa_e67282_Figure_6_source_data_1.xlsx
