# Supplementary material for: SSNA1 stabilizes dynamic microtubules and detects microtubule damage
Source: eLife journal article supplement (doi:10.7554/elife.67282), 2021-12-31
Supplement: supp [file elife-67282-supp-v1.zip]

A

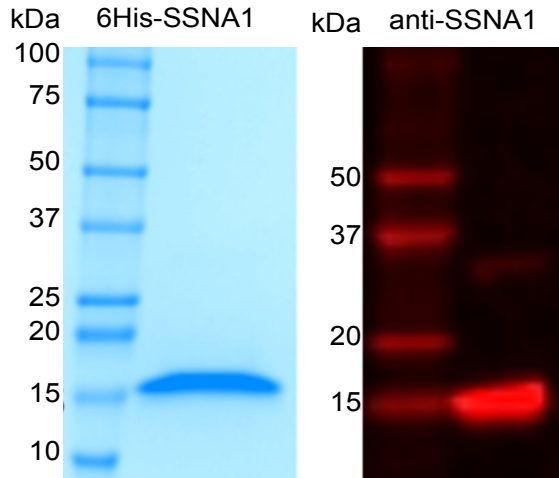

B

| Accession     | Protein      | % Coverage | # unique peptides | # total peptides | Mw (kDa)  |
|---------------|--------------|------------|-------------------|------------------|-----------|
| <b>O43805</b> | <b>SSNA1</b> | <b>82</b>  | <b>38</b>         | <b>235</b>       | <b>16</b> |
| P04264        | Keratin II   | 66         | 49                | 75               | 66        |
| P35908        | Keratin II   | 84         | 39                | 56               | 65        |
| P13645        | Keratin I    | 58         | 35                | 54               | 49        |
| P35527        | Keratin I    | 49         | 23                | 41               | 62        |
| P08779        | Keratin II   | 38         | 18                | 25               | 62        |
| P02533        | Keratin I    | 45         | 19                | 25               | 52        |
| P13647        | Keratin II   | 44         | 14                | 25               | 60        |
| P48668        | Keratin I    | 52         | 9                 | 25               | 51        |
| P02538        | Keratin I    | 46         | 2                 | 25               | 60        |
| Q04695        | Keratin I    | 28         | 4                 | 18               | 48        |
