# Supplementary material for: SSNA1 stabilizes dynamic microtubules and detects microtubule damage
Source: eLife journal article supplement (doi:10.7554/elife.67282), 2021-12-31
Supplement: supp [file elife-67282-supp-v1.zip › elife_poa_e67282_Figure_1_source_data_1.xlsx]

## Sheet: Fig1B
	Control				SSNA1
[tubulin] µM	total MTs	# MTs with at least 1 end nucleated	% at least 1 end nucleated	SE	total MTs	# MTs with at least 1 end nucleated	% at least 1 end nucleated	SE
3	48	1	0.0208333	0.0208333	36	1	0.0277778	0.0277778
4	44	2	0.0454545	0.0321412	34	7	0.205882	0.0778162
4	50	4	0.08	0.04	62	16	0.258065	0.0645161
5	67	14	0.208955	0.0558456	69	21	0.304348	0.0664141
5	52	24	0.461538	0.0942111	69	39	0.565217	0.0905072
5.5	68	30	0.441176	0.0805474	77	41	0.532468	0.0831575
6	30	14	0.466667	0.124722	33	31	0.939394	0.16872
6	36	14	0.388889	0.103935	40	34	0.85	0.145774
7	56	48	0.857143	0.123718	38	35	0.921053	0.155686
8	36	31	0.861111	0.15466	38	37	0.973684	0.160073
10	45	44	0.977778	0.147406	77	75	0.974026	0.112471

## Sheet: Fig1D, Fig1S2. Dynamicity
	Microtubule Plus End		Microtubule Minus End
[ssna1] µM	Dynamicity nm/s (weighted means)	SE	Dynamicity nm/s (weighted means)	SE
0	23.0314	0.0375926	5.97129	0.0335206
0.125	19.2377	0.0758668	4.43313	0.0442411
0.25	20.5989	0.054551	4.76041	0.0311324
0.5	18.5421	0.0561672	3.75492	0.0266591
1	11.5098	0.0271987	3.46819	0.0180358
2	6.57323	0.0314106	2.66558	0.0253343
3	6.31391	0.0238037	2.31243	0.0206115

## Sheet: Fig1E, Fig1S2. Catastrophe freq
	Microtubule Plus End		Microtubule Minus End
[ssna1] µM	Cat. Freq. /min (weighted means)	SE	Cat. Freq. /min (weighted means)	SE
0	0.366746	0.0121693	0.135281	0.00788461
0.125	0.299859	0.0193963	0.0540343	0.00888319
0.25	0.255151	0.0122658	0.0618822	0.00648067
0.5	0.250107	0.0119124	0.0340474	0.00468667
1	0.0767899	0.00593383	0.00438804	0.00206582
2	0.0211506	0.00498523	0.00122655	0.00122655
3	0.0324022	0.00417384	0.00121954	0.000907546

## Sheet: FIg1F, Fig1S2. Shrinkage rates
	Microtubule Plus End		Microtubule Minus End
[ssna1] µM	Vs nm/s (weighted means)	SE	Vs nm/s (weighted means)	SE
0	192.38	5.45689	385.464	24.5056
0.125	165.846	7.80419	220.8	31.1424
0.25	130.143	5.23603	247.84	26.6297
0.5	95.1472	4.06253	221.962	29.2498
1	147.112	15.3819	258.953	40.2889
2	71.6034	11.368
3	38.6161	3.76458

## Sheet: Fig1S2. Growth rates
	Microtubule Plus End		Microtubule Minus End
[ssna1] µM	Vg nm/s (weighted means)	SE	Vg nm/s (weighted means)	SE
0	13.7636	0.107025	4.36492	0.109365
0.125	13.471	0.253484	4.16001	0.278402
0.25	14.363	0.175981	4.22138	0.144812
0.5	13.0713	0.179719	3.6162	0.139752
1	11.744	0.253195	3.14531	0.100291
2	7.67446	0.649497	2.7254	0.158892
3	8.05145	0.37322	2.2862	0.0935468

## Sheet: Fig1S2. Rescue freq
	Microtubule Plus End		Microtubule Minus End
[ssna1] µM	Rescue Frequency per shrinkage length /µm (weighted means)	SE	Rescue Frequency per shrinkage length /µm (weighted means)	SE
0	0.507348	0.0178586	1.08555	0.0640417
0.125	0.570101	0.0388802	1.05882	0.178905
0.25	0.553381	0.0274918	1.08502	0.118754
0.5	0.64637	0.0324116	1.06786	0.141947
1	0.748406	0.0596037	1.05315	0.227549
2	0.865385	0.209562
3	1.11079	0.13211

## Sheet: Raw data - all dynamics
[SSNA1] (uM)	Vg (nm/s)	SE	n	Cat. Freq. (min-1)	SE	n	Rescue per Shrinkage Length (1/µm)	SE	n	Vs (nm/s)	SE	n	Dynamicity (nm/s)	SE	n
Microtubule plus end
0	16.814	0.263394	111	0.306536	0.0262853	136	0.38545	0.0332969	135	184.096	9.19186	130	27.282	0.0969592	309
0	14.5584	0.154978	273	0.369961	0.0164957	503	0.551836	0.0252668	478	266.742	11.7343	426	22.9176	0.0443433	555
0	11.298	0.178874	101	0.412956	0.0247675	278	0.567703	0.0387166	216	161.863	8.30914	206	18.7777	0.103874	635
0.125	13.471	0.253484	142	0.299859	0.0193963	239	0.570101	0.0388802	216	165.846	7.80419	200	19.2377	0.0758668	559
0.25	17.4432	0.322335	107	0.210188	0.0191875	120	0.434909	0.0398666	120	182.368	11.6477	112	23.3077	0.0742905	286
0.25	13.055	0.210047	205	0.286223	0.0159506	322	0.660803	0.0379619	304	116.916	5.86169	276	17.4295	0.08036	741
0.5	16.0218	0.349074	101	0.194936	0.0185025	111	0.47089	0.0451013	110	172.601	13.7719	100	20.7894	0.0723967	268
0.5	12.0072	0.209638	179	0.289167	0.0155682	345	0.833785	0.0466098	321	87.7649	4.25173	251	15.1444	0.0890204	802
1	17.6475	0.50947	76	0.125874	0.0150448	70	0.596593	0.071814	70	159.616	18.8552	59	19.1891	0.063415	186
1	10.9934	0.57914	42	0.059879	0.0104236	33	1.11525	0.200207	32	158.356	45.6121	14	10.6134	0.0507401	112
1	9.40436	0.337781	65	0.0726482	0.00822579	78	1.07227	0.126356	73	103.623	32.7378	3	9.32498	0.037406	240
2	7.67446	0.649497	43	0.0211506	0.00498523	18	0.865385	0.209562	18	71.6034	11.368	14	6.57323	0.0314106	102
3	8.66774	0.509693	49	0.0695652	0.0102568	46	1.05566	0.160945	44	89.6743	16.986	22	8.09462	0.047722	145
3	7.33901	0.548014	60	0.0250269	0.00456927	30	1.22466	0.231302	29	35.9786	3.86059	9	5.72413	0.0274643	155
Microtubule minus end
0	5.89183	0.299271	36	0.186436	0.0201039	86	0.903216	0.10035	82	320.841	36.1022	43	8.17022	0.082273	309
0	5.0938	0.166995	59	0.13951	0.0116258	144	1.15612	0.0977072	141	502.654	45.7552	58	6.43968	0.0493313	368
0	3.18448	0.165332	25	0.109872	0.012687	75	1.35494	0.158569	74	370.247	48.7773	20	4.40985	0.0549387	200
0.125	4.16001	0.278402	37	0.0540343	0.00888319	37	1.05882	0.178905	36	220.8	31.1424	16	4.43313	0.0442411	130
0.25	5.30637	0.25562	42	0.0744696	0.0113565	43	0.96516	0.15256	41	285.833	39.8317	16	6.00546	0.0522574	129
0.25	3.70859	0.175731	47	0.0558036	0.00789182	50	1.26932	0.189174	46	217.133	35.8089	16	4.07539	0.0387619	171
0.5	4.8411	0.3058	30	0.0893772	0.0141318	40	0.925926	0.161113	34	268.444	37.9515	21	5.50366	0.0644974	118
0.5	3.29284	0.157119	47	0.0272099	0.00496782	30	1.56019	0.300067	28	153.956	45.9052	3	3.3946	0.029277	147
1	6.00613	0.321207	33	0.0393521	0.00838989	22	1.04696	0.22823	22	258.953	40.2889	8	6.08328	0.0436436	84
1	3.32062	0.231313	16	0.00213144	0.00213144	1	2.08333	2.94628	1				3.35915	0.0331422	34
1	2.70887	0.118645	33	0	0	0							2.69099	0.0247025	66
2	2.7254	0.158892	30	0.00122655	0.00122655	1							2.66558	0.0253343	60
3	2.16264	0.150682	16	0.00201005	0.00201005	1							2.07688	0.0426666	56
3	2.36369	0.119327	35	0.00101712	0.00101712	1							2.38413	0.0235406	72
