# Supplementary material for: SSNA1 stabilizes dynamic microtubules and detects microtubule damage
Source: eLife journal article supplement (doi:10.7554/elife.67282), 2021-12-31
Supplement: supp [file elife-67282-supp-v1.zip › elife_poa_e67282_Figure_2_source_data_1.xlsx]

## Sheet: 2B
ky1		ky2		ky3		ky4		ky6		ky8		ky10		ky12		ky14		ky16		ky18		ky20		ky28		ky30		ky38		ky44		ky46		ky50		ky52		ky60		ky62		ky64		ky66		ky70		ky72
time (min)	position (µm)	time (min)	position (µm)	time (min)	position (µm)	time (min)	position (µm)	time (min)	position (µm)	time (min)	position (µm)	time (min)	position (µm)	time (min)	position (µm)	time (min)	position (µm)	time (min)	position (µm)	time (min)	position (µm)	time (min)	position (µm)	time (min)	position (µm)	time (min)	position (µm)	time (min)	position (µm)	time (min)	position (µm)	time (min)	position (µm)	time (min)	position (µm)	time (min)	position (µm)	time (min)	position (µm)	time (min)	position (µm)	time (min)	position (µm)	time (min)	position (µm)	time (min)	position (µm)	time (min)	position (µm)
0.166667	0	0.166667	0	0.166667	0	4.16667	0	3.58333	0	1.41667	0	0.166667	0	1	0	0.166667	0	0.166667	0	0.25	0	1.08333	0	0.166667	0	0.166667	0	0.166667	0	1.5	0	0.166667	0	0.75	0	0.666667	0	0.166667	0	0.166667	0	21.25	0	0.166667	0	0.166667	0	0.166667	0
0.25	0.051907	0.25	0.07335	0.25	0.003344	4.25	0.089372	3.66667	0.078674	1.5	0.096915	0.25	0.151721	1.08333	0.119466	0.25	0.002953	0.25	0.048676	0.333333	0.058911	1.16667	0.086892	0.25	0.015352	0.25	0.002335	0.25	0.041714	1.58333	0.248332	0.25	0.05974	0.833333	0.141194	0.75	0.113892	0.25	0.045883	0.25	0.022835	21.3333	0.132621	0.25	0.048992	0.25	0.020503	0.25	0.057141
0.333333	0.142744	0.333333	0.247239	0.333333	0.048112	4.33333	0.156058	3.75	0.111732	1.58333	0.185386	0.333333	0.297481	1.16667	0.204304	0.333333	0.018428	0.333333	0.098154	0.416667	0.035374	1.25	0.128319	0.333333	0.078446	0.333333	0.071089	0.333333	0.060664	1.66667	0.394619	0.333333	0.107993	0.916667	0.214001	0.833333	0.214266	0.333333	0.026523	0.333333	0.00863	21.4167	0.265242	0.333333	0.141935	0.333333	0.051399	0.333333	0.119418
0.416667	0.178978	0.416667	0.421129	0.416667	0.091397	4.41667	0.237433	3.83333	0.072571	1.66667	0.322173	0.416667	0.421101	1.25	0.277821	0.416667	0.024464	0.416667	0.143001	0.5	0.011838	1.33333	0.150157	0.416667	0.101625	0.416667	0.131347	0.416667	0.117236	1.75	0.923507	0.416667	0.127369	1	0.246076	0.916667	0.286021	0.416667	0.026944	0.416667	0.002751	21.5	0.293078	0.416667	0.22065	0.416667	0.119175	0.416667	0.127205
0.5	0.146335	0.5	0.6326	0.5	0.158347	4.5	0.275753	3.91667	0.084137	1.75	0.444658	0.5	0.490818	1.33333	0.344855	0.5	0.009822	0.5	0.209093	0.583333	0.011699	1.41667	0.18067	0.5	0.114301	0.5	0.284728	0.5	0.161062	1.83333	1.20192	0.5	0.160516	1.08333	0.200172	1	0.383614	0.5	0.079247	0.5	0.046145	21.5833	0.32743	0.5	0.286948	0.5	0.183292	0.5	0.145453
0.583333	0.11619	0.583333	0.75001	0.583333	0.202895	4.58333	0.339084	4	0.134929	1.83333	0.54402	0.583333	0.615492	1.41667	0.408999	0.583333	0.038275	0.583333	0.253096	0.666667	0.024901	1.5	0.278321	0.583333	0.137329	0.583333	0.368568	0.583333	0.188079	1.91667	1.21038	0.583333	0.20269	1.16667	0.180179	1.08333	0.467538	0.583333	0.108525	0.583333	0.091514	21.6667	0.3355	0.583333	0.313874	0.583333	0.227705	0.583333	0.183376
0.666667	0.080603	0.666667	0.803793	0.666667	0.236672	4.66667	0.403895	4.08333	0.174043	1.91667	0.592038	0.666667	0.772846	1.5	0.469381	0.666667	0.087063	0.666667	0.303598	0.75	0.045981	1.58333	0.36707	0.666667	0.178791	0.666667	0.411999	0.666667	0.208826	2	1.26457	0.666667	0.253503	1.25	0.165186	1.16667	0.602581	0.666667	0.196257	0.666667	0.111972	21.75	0.35618	0.666667	0.31293	0.666667	0.282886	0.666667	0.264046
0.75	0.036433	0.75	0.940968	0.75	0.27696	4.75	0.447529	4.16667	0.176018	2	0.607094	0.75	0.842607	1.58333	0.522395	0.75	0.144538	0.75	0.37314	0.833333	0.1206	1.66667	0.446186	0.75	0.156348	0.75	0.491012	0.75	0.255909	2.08333	1.20272	0.75	0.276596	1.33333	0.143937	1.25	0.613417	0.75	0.272706	0.75	0.112356	21.8333	0.363789	0.75	0.275606	0.75	0.320351	0.75	0.309131
0.833333	0.042406	0.833333	1.05579	0.833333	0.317094	4.83333	0.476456	4.25	0.230942	2.08333	0.623396	0.833333	0.871293	1.66667	0.545174	0.833333	0.165597	0.833333	0.442252	0.916667	0.125919	1.75	0.504399	0.833333	0.159044	0.833333	0.366814	0.833333	0.285457	2.16667	1.17243	0.833333	0.283136	1.41667	0.043309	1.33333	0.684662	0.833333	0.321621	0.833333	0.140647	21.9167	0.361032	0.833333	0.205247	0.833333	0.3933	0.833333	0.379645
0.916667	0.036404	0.916667	1.19402	0.916667	0.376031	4.91667	0.460331	4.33333	0.283519	2.16667	0.670477	0.916667	0.87597	1.75	0.575984	0.916667	0.186912	0.916667	0.430026	1	0.225006	1.83333	0.508186	0.916667	0.159281	0.916667	0.12345	0.916667	0.336445	2.25	1.16436	0.916667	0.29676	1.5	0.001751	1.41667	0.730691	0.916667	0.337567	0.916667	0.075073	22	0.352453	0.916667	0.105993	0.916667	0.453623	0.916667	0.420532
1	0.110084	1	1.2483	1	0.451132	5	0.502747	4.41667	0.278911	2.25	0.769718	1	0.889928	1.83333	0.572464	1	0.179345	1	0.295129	1.08333	0.383516	1.91667	0.472113	1	0.245975	1	0.119914	1	0.372425	2.33333	1.10629	1	0.339012	1.58333	0.040075	1.5	0.817711	1	0.340592	1	0.009115	22.0833	0.368874	1	0.007804	1	0.488327	1	0.585321
1.08333	0.211656	1.08333	1.29538	1.08333	0.534566	5.08333	0.55456	4.5	0.225867	2.33333	0.895631	1.08333	0.907923	1.91667	0.537186	1.08333	0.136554	1.08333	0.019566	1.16667	0.370632	2	0.386914	1.08333	0.385902	1.08333	0.167124	1.08333	0.449001	2.41667	1.16091	1.08333	0.390302	1.66667	0.081901	1.58333	0.888485	1.08333	0.382231	1.08333	0.047444	22.1667	0.370582	1.08333	0.042324	1.08333	0.512596	1.08333	0.712108
1.16667	0.357072	1.16667	1.38608	1.16667	0.58721	5.16667	0.614957	4.58333	0.228326	2.41667	0.972757	1.16667	0.950104	2	0.431122	1.16667	0.129664	1.16667	0.158611	1.25	0.357748	2.08333	0.337039	1.16667	0.414932	1.16667	0.133096	1.16667	0.539166	2.5	0.971554	1.16667	0.45953	1.75	0.101888	1.66667	0.953598	1.16667	0.406753	1.16667	0.000451	22.25	0.361201	1.16667	0.056667	1.16667	0.501979	1.16667	0.829664
1.25	0.389404	1.25	1.50114	1.25	0.621722	5.25	0.65183	4.66667	0.258307	2.5	1.0905	1.25	1.00941	2.08333	0.362714	1.25	0.101198	1.25	0.205771	1.33333	0.415733	2.16667	0.308672	1.25	0.448352	1.25	0.022201	1.25	0.649224	2.58333	1.04314	1.25	0.511837	1.83333	0.180629	1.75	0.994573	1.25	0.426048	1.25	0.068404	22.3333	0.337491	1.25	0.108606	1.25	0.511199	1.25	0.923344
1.33333	0.390416	1.33333	1.61521	1.33333	0.648411	5.33333	0.698145	4.75	0.298658	2.58333	1.16668	1.33333	1.1048	2.16667	0.333607	1.33333	0.107097	1.33333	0.171227	1.41667	0.552465	2.25	0.30007	1.33333	0.514739	1.33333	0.036893	1.33333	0.727295	2.66667	1.03695	1.33333	0.582879	1.91667	0.27151	1.83333	1.07293	1.33333	0.421725	1.33333	0.103496	22.4167	0.330271	1.33333	0.18366	1.33333	0.539493	1.33333	0.988309
1.41667	0.329494	1.41667	1.66069	1.41667	0.649228	5.41667	0.786978	4.83333	0.338445	2.66667	1.26264	1.41667	1.17312	2.25	0.375425	1.41667	0.060144	1.41667	0.117068	1.5	0.689197	2.33333	0.305854	1.41667	0.60633	1.41667	0.128504	1.41667	0.789416	2.75	1.0683	1.41667	0.657356	2	0.385198	1.91667	1.15472	1.41667	0.438996	1.41667	0.155037	22.5	0.333587	1.41667	0.19439	1.41667	0.616656	1.41667	1.08119
1.5	0.274773	1.5	1.73148	1.5	0.667126	5.5	0.876442	4.91667	0.390057	2.75	1.30622	1.5	1.22241	2.33333	0.404637	1.5	0.005281	1.5	0.011999	1.58333	0.663166	2.41667	0.311147	1.5	0.640346	1.5	0.163289	1.5	0.856098	2.83333	1.03256	1.5	0.701208	2.08333	0.438808	2	1.25407	1.5	0.468511	1.5	0.254369	22.5833	0.363511	1.5	0.211495	1.5	0.691347	1.5	1.12842
1.58333	0.220821	1.58333	1.79194	1.58333	0.67795	5.58333	0.935056	5	0.46385	2.83333	1.39446	1.58333	1.27	2.41667	0.501707	1.58333	0.103942	1.58333	0.127563	1.66667	0.592283	2.5	0.353516	1.58333	0.687219	1.58333	0.270033	1.58333	0.893606	2.91667	0.907425	1.58333	0.757765	2.16667	0.469064	2.08333	1.31189	1.58333	0.51081	1.58333	0.378254	22.6667	0.386394	1.58333	0.210065	1.58333	0.727097	1.58333	1.27129
1.66667	0.305597	1.66667	1.88388	1.66667	0.864625	5.66667	1.00977	5.08333	0.55758	2.91667	1.44283	1.66667	1.31873	2.5	0.580523	1.66667	0.172394	1.66667	0.169787	1.75	0.521401	2.58333	0.377529	1.66667	0.750858	1.66667	0.451414	1.66667	0.948665	3	0.678273	1.66667	0.823719	2.25	0.49416	2.16667	1.3602	1.66667	0.572365	1.66667	0.445945	22.75	0.408731	1.66667	0.252874	1.66667	0.760024	1.66667	1.39463
1.75	0.318967	1.75	1.97192	1.75	1.01063	5.75	1.11059	5.16667	0.678553	3	1.50543	1.75	1.38618	2.58333	0.666163	1.75	0.218013	1.75	0.173769	1.83333	0.657999	2.66667	0.357773	1.75	0.821908	1.75	0.567125	1.75	0.991842	3.08333	0.192441	1.75	0.916363	2.33333	0.430753	2.25	1.4031	1.75	0.64763	1.75	0.500893	22.8333	0.431538	1.75	0.260377	1.75	0.772079	1.75	1.48809
1.83333	0.344706	1.83333	2.11826	1.83333	1.17489	5.83333	1.20412	5.25	0.754409	3.08333	1.56059	1.83333	1.43568	2.66667	0.733699	1.83333	0.079105	1.83333	0.130318	1.91667	0.794597	2.75	0.329287	1.83333	0.834961	1.83333	0.648522	1.83333	1.03538	3.16667	0.089031	1.83333	0.995626	2.41667	0.284243	2.33333	1.45584	1.83333	0.768892	1.83333	0.625672	22.9167	0.429647	1.83333	0.256123	1.83333	0.682937	1.83333	1.54776
1.91667	0.369169	1.91667	2.22972	1.91667	1.25694	5.91667	1.31308	5.33333	0.757034	3.16667	1.64105	1.91667	1.45921	2.75	0.784625	1.91667	0.084003	1.91667	0.08134	2	0.835685	2.83333	0.300029	1.91667	0.827314	1.91667	0.650728	1.91667	1.10269	3.25	0.123661	1.91667	1.04478	2.5	0.072076	2.41667	1.53391	1.91667	0.832106	1.91667	0.721828	23	0.454654	1.91667	0.243422	1.91667	0.499338	1.91667	1.5866
2	0.337484	2	2.32858	2	1.29547	6	1.42039	5.41667	0.782382	3.25	1.70649	2	1.48397	2.83333	0.827573	2	0.187123	2	0.044814	2.08333	0.922052	2.91667	0.315965	2	0.825839	2	0.803457	2	1.21837	3.33333	0.015671	2	1.08924	2.58333	0.069472	2.5	1.59696	2	0.861698	2	0.838717	23.0833	0.49555	2	0.268814	2	0.334667	2	1.69892
2.08333	0.304153	2.08333	2.37508	2.08333	1.32129	6.08333	1.52654	5.5	0.850004	3.33333	1.7589	2.08333	1.55878	2.91667	0.874234	2.08333	0.181692	2.08333	0.007804	2.16667	1.01903	3	0.365759	2.08333	0.843857	2.08333	0.863241	2.08333	1.34198	3.41667	0.003665	2.08333	1.11509	2.66667	0.14891	2.58333	1.67176	2.08333	0.869025	2.08333	0.895762	23.1667	0.546004	2.08333	0.287351	2.08333	0.345546	2.08333	1.79774
2.16667	0.22347	2.16667	2.37854	2.16667	1.04497	6.16667	1.58624	5.58333	0.916833	3.41667	1.79942	2.16667	1.63565	3	0.975849	2.16667	0.160834	2.16667	0.00479	2.25	1.11601	3.08333	0.487101	2.16667	0.95099	2.16667	0.962319	2.16667	1.38756	3.5	0.078879	2.16667	1.11341	2.75	0.263904	2.66667	1.74985	2.16667	0.910631	2.16667	0.977029	23.25	0.574681	2.16667	0.301139	2.16667	0.379818	2.16667	1.91476
2.25	0.050213	2.25	2.35231	2.25	0.768649	6.25	1.62257	5.66667	0.98375	3.5	1.86961	2.25	1.69937	3.08333	1.01265	2.25	0.186447	2.25	0.010842	2.33333	1.21299	3.16667	0.576541	2.25	1.01267	2.25	1.00603	2.25	1.40473	3.58333	0.123298	2.25	1.10645	2.83333	0.391441	2.75	1.77638	2.25	0.951137	2.25	1.01654	23.3333	0.591819	2.25	0.284377	2.25	0.433838	2.25	1.94409
2.33333	0.008463	2.33333	2.34676	2.33333	0.49233	6.33333	1.6271	5.75	1.03266	3.58333	1.94516	2.33333	1.43955	3.16667	1.10629	2.33333	0.204836	2.33333	0.027952	2.41667	1.29024	3.25	0.629119	2.33333	1.06459	2.33333	1.19177	2.33333	1.47262	3.66667	0.205681	2.33333	0.979403	2.91667	0.522285	2.83333	1.79421	2.33333	1.00926	2.33333	1.07842	23.4167	0.610615	2.33333	0.309501	2.33333	0.520854	2.33333	1.97777
2.41667	0.011353	2.41667	2.38555	2.41667	0.232014	6.41667	1.62327	5.83333	1.07038	3.66667	2.03069	2.41667	1.17974	3.25	1.15535	2.41667	0.233309	2.41667	0.082814	2.5	1.20842	3.33333	0.647498	2.41667	1.08065	2.41667	1.28852	2.41667	1.57039	3.75	0.293803	2.41667	0.760506	3	0.595621	2.91667	1.78579	2.41667	1.05806	2.41667	1.13955	23.5	0.625828	2.41667	0.32608	2.41667	0.658783	2.41667	2.03031
2.5	0.03202	2.5	2.44808	2.5	0.064996	6.5	1.64877	5.91667	1.12418	3.75	2.0705	2.5	0.919931	3.33333	1.19918	2.5	0.241228	2.5	0.131826	2.58333	1.22442	3.41667	0.666868	2.5	1.0983	2.5	1.28715	2.5	1.69425	3.83333	0.389165	2.5	0.577944	3.08333	0.638636	3	1.81966	2.5	1.12449	2.5	1.20487	23.5833	0.659566	2.5	0.376643	2.5	0.771391	2.5	2.13341
2.58333	0.048788	2.58333	2.52631	2.58333	0.005523	6.58333	1.67232	6	1.19643	3.83333	2.11563	2.58333	0.660119	3.41667	1.17881	2.58333	0.249584	2.58333	0.170435	2.66667	1.3638	3.5	0.557261	2.58333	1.09484	2.58333	1.25848	2.58333	1.76317	3.91667	0.524614	2.58333	0.510675	3.16667	0.637033	3.08333	1.86944	2.58333	1.1544	2.58333	1.26001	23.6667	0.687305	2.58333	0.456118	2.58333	0.843304	2.58333	2.18456
2.66667	0.118012	2.66667	2.70838	2.66667	0.016406	6.66667	1.73013	6.08333	1.29608	3.91667	2.18772	2.66667	0.400307	3.5	1.21326	2.66667	0.199887	2.66667	0.170465	2.75	1.50319	3.58333	0.447654	2.66667	1.09611	2.66667	1.29051	2.66667	1.81205	4	0.624682	2.66667	0.46181	3.25	0.682261	3.16667	1.90537	2.66667	1.121	2.66667	1.30139	23.75	0.703996	2.66667	0.502977	2.66667	0.881457	2.66667	2.22295
2.75	0.171415	2.75	2.78122	2.75	0.063116	6.75	1.77688	6.16667	1.3745	4	2.26409	2.75	0.180822	3.58333	1.23759	2.75	0.144544	2.75	0.205043	2.83333	1.64258	3.66667	0.338046	2.75	1.08772	2.75	1.39685	2.75	1.86911	4.08333	0.716207	2.75	0.436342	3.33333	0.724324	3.25	1.94384	2.75	1.02497	2.75	1.3502	23.8333	0.680258	2.75	0.510588	2.75	0.913552	2.75	2.28067
2.83333	0.20656	2.83333	2.90607	2.83333	0.088945	6.83333	1.83561	6.25	1.44645	4.08333	2.34011	2.83333	0.104808	3.66667	1.30796	2.83333	0.127181	2.83333	0.256234	2.91667	1.61623	3.75	0.228439	2.83333	1.0548	2.83333	1.48998	2.83333	1.95307	4.16667	0.716056	2.83333	0.463094	3.41667	0.777266	3.33333	1.96819	2.83333	0.852289	2.83333	1.38432	23.9167	0.675285	2.83333	0.48454	2.83333	0.922423	2.83333	2.39265
2.91667	0.187237	2.91667	2.95093	2.91667	0.080295	6.91667	1.86055	6.33333	1.51389	4.16667	2.4004	2.91667	0.112037	3.75	1.35449	2.91667	0.139726	2.91667	0.302903	3	1.73043	3.83333	0.118832	2.91667	1.04788	2.91667	1.48559	2.91667	2.02051	4.25	0.724846	2.91667	0.548822	3.5	0.788846	3.41667	2.00928	2.91667	0.579446	2.91667	1.45352	24	0.685492	2.91667	0.50997	2.91667	0.922544	2.91667	2.50145
3	0.172376	3	3.00438	3	0.154751	7	1.93108	6.41667	1.58407	4.25	2.42147	3	0.099563	3.83333	1.45552	3	0.157985	3	0.253387	3.08333	1.87572	3.91667	0.026646	3	1.05747	3	1.37246	3	2.07626	4.33333	0.798139	3	0.64112	3.58333	0.777212	3.5	2.00591	3	0.38567	3	1.48156	24.0833	0.692043	3	0.53513	3	0.90386	3	2.59684
3.08333	0.179396	3.08333	3.01844	3.08333	0.225557	7.08333	2.03161	6.5	1.68294	4.33333	2.37302	3.08333	0.079327	3.91667	1.51051	3.08333	0.141996	3.08333	0.166205	3.16667	2.02101	4	0.086571	3.08333	1.13758	3.08333	1.04337	3.08333	2.12757	4.41667	0.84314	3.08333	0.703742	3.66667	0.789792	3.58333	2.0326	3.08333	0.362337	3.08333	1.53182	24.1667	0.711166	3.08333	0.530268	3.08333	0.90476	3.08333	2.72965
3.16667	0.194726	3.16667	3.0679	3.16667	0.346989	7.16667	2.17674	6.58333	1.75241	4.41667	2.12838	3.16667	0.028458	4	1.60712	3.16667	0.182033	3.16667	0.087869	3.25	2.1663	4.08333	0.034084	3.16667	1.1261	3.16667	0.714289	3.16667	2.16949	4.5	0.842396	3.16667	0.728964	3.75	0.620852	3.66667	2.07474	3.16667	0.337459	3.16667	1.77652	24.25	0.71357	3.16667	0.504521	3.16667	0.901415	3.16667	2.81138
3.25	0.239894	3.25	3.19165	3.25	0.431984	7.25	2.28575	6.66667	1.82662	4.5	1.88374	3.25	0.023194	4.08333	1.67431	3.25	0.178553	3.25	0.010757	3.33333	2.31382	4.16667	0.042989	3.25	1.15456	3.25	0.381723	3.25	2.23135	4.58333	0.880874	3.25	0.811247	3.83333	0.312179	3.75	2.12272	3.25	0.317376	3.25	1.82963	24.3333	0.720385	3.25	0.510188	3.25	0.98536	3.25	3.02059
3.33333	0.377582	3.33333	3.30925	3.33333	0.555085	7.33333	2.35963	6.75	1.95857	4.58333	1.65096	3.33333	0.103914	4.16667	1.40884	3.33333	0.181283	3.33333	0.015166	3.41667	2.46135	4.25	0.131496	3.33333	1.14501	3.33333	0.049158	3.33333	2.34229	4.66667	0.961719	3.33333	0.948063	3.91667	0.232363	3.83333	2.15899	3.33333	0.326182	3.33333	1.93074	24.4167	0.718989	3.33333	0.542967	3.33333	1.06921	3.33333	3.16378
3.41667	0.438932	3.41667	3.42759	3.41667	0.644959	7.41667	2.38817	6.83333	2.10563	4.66667	1.54487	3.41667	0.153449	4.25	1.14338	3.41667	0.16304	3.41667	0.023739	3.5	2.60888	4.33333	0.220081	3.41667	1.2095	3.41667	0.00502	3.41667	2.43474	4.75	1.17906	3.41667	1.00212	4	0.260113	3.91667	2.20678	3.41667	0.401696	3.41667	1.93255	24.5	0.720671	3.41667	0.551675	3.41667	1.15223	3.41667	3.22475
3.5	0.344558	3.5	3.46688	3.5	0.710509	7.5	2.42044	6.91667	2.21493	4.75	1.60423	3.5	0.186138	4.33333	0.877915	3.5	0.169264	3.5	0.01892	3.58333	2.59028	4.41667	0.248118	3.5	1.19651	3.5	0.1501	3.5	2.4864	4.83333	1.3235	3.5	1.05175	4.08333	0.335486	4	2.24483	3.5	0.510736	3.5	1.99131	24.5833	0.742247	3.5	0.58437	3.5	1.22004	3.5	3.28705
3.58333	0.287343	3.58333	3.57268	3.58333	0.777829	7.58333	2.51173	7	2.28209	4.83333	1.72029	3.58333	0.116706	4.41667	0.61245	3.58333	0.173422	3.58333	0.034433	3.66667	2.57167	4.5	0.241664	3.58333	1.23449	3.58333	0.194936	3.58333	2.47578	4.91667	1.36537	3.58333	1.06166	4.16667	0.400881	4.08333	2.392	3.58333	0.532669	3.58333	2.01965	24.6667	0.731651	3.58333	0.550478	3.58333	1.24935	3.58333	3.29891
3.66667	0.240831	3.66667	3.61478	3.66667	0.81727	7.66667	2.66143	7.08333	2.31105	4.91667	1.86456	3.66667	0.096465	4.5	0.346985	3.66667	0.202335	3.66667	0.066861	3.75	2.51742	4.58333	0.224815	3.66667	1.25528	3.66667	0.22968	3.66667	2.51708	5	1.42882	3.66667	1.1204	4.25	0.439465	4.16667	2.43107	3.66667	0.500871	3.66667	2.10183	24.75	0.711267	3.66667	0.590808	3.66667	1.27023	3.66667	3.33479
3.75	0.234952	3.75	3.63579	3.75	0.815155	7.75	2.7622	7.16667	2.31798	5	1.91014	3.75	0.098714	4.58333	0.256162	3.75	0.25009	3.75	0.112985	3.83333	2.64752	4.66667	0.241278	3.75	1.27181	3.75	0.262568	3.75	2.60762	5.08333	1.45408	3.75	1.18381	4.33333	0.476786	4.25	2.55497	3.75	0.480087	3.75	2.16254	24.8333	0.704287	3.75	0.595469	3.75	1.26592	3.75	3.35608
3.83333	0.200638	3.83333	3.36672	3.83333	0.497458	7.83333	2.83002	7.25	2.32207	5.08333	1.93352	3.83333	0.202764	4.66667	0.185684	3.83333	0.233698	3.83333	0.175885	3.91667	2.77762	4.75	0.309145	3.83333	1.28055	3.83333	0.342129	3.83333	2.64777	5.16667	1.48755	3.83333	1.2355	4.41667	0.468407	4.33333	2.6748	3.83333	0.465957	3.83333	2.22112	24.9167	0.739076	3.83333	0.649889	3.83333	1.34655	3.83333	3.3541
3.91667	0.176669	3.91667	3.09764	3.91667	0.17976	7.91667	2.90328	7.33333	2.35788	5.16667	1.97297	3.91667	0.299478	4.75	0.114162	3.91667	0.144088	3.91667	0.249518	4	2.83378	4.83333	0.405346	3.91667	1.26857	3.91667	0.37589	3.91667	2.69411	5.25	1.52391	3.91667	1.30677	4.5	0.476212	4.41667	2.73911	3.91667	0.487415	3.91667	2.27923	25	0.787077	3.91667	0.665619	3.91667	1.4533	3.91667	3.36949
4	0.167055	4	2.82857	4	0.028178	8	2.98026	7.41667	2.39597	5.25	2.08309	4	0.341988	4.83333	0.101117	4	0.093586	4	0.300192	4.08333	2.82303	4.91667	0.506833	4	1.29465	4	0.397327	4	2.71102	5.33333	1.6328	4	1.37343	4.58333	0.505478	4.5	2.80389	4	0.484637	4	2.30773	25.0833	0.835577	4	0.700067	4	1.52393	4	3.38431
4.08333	0.146354	4.08333	2.67351	4.08333	0.050499	8.08333	3.08741	7.5	2.47649	5.33333	2.16418	4.08333	0.432142	4.91667	0.112643	4.08333	0.148558	4.08333	0.327649	4.16667	2.85643	5	0.608319	4.08333	1.31033	4.08333	0.462912	4.08333	2.76386	5.41667	1.76461	4.08333	1.44214	4.66667	0.578256	4.58333	2.8166	4.08333	0.435049	4.08333	2.33923	25.1667	0.855628	4.08333	0.721277	4.08333	1.55158	4.08333	3.46367
4.16667	0.171176	4.16667	2.69122	4.16667	0.129937	8.16667	3.22191	7.58333	2.49963	5.41667	2.20818	4.16667	0.484505	5	0.138517	4.16667	0.209199	4.16667	0.37467	4.25	2.88656	5.08333	0.709805	4.16667	1.32309	4.16667	0.547816	4.16667	2.80125	5.5	1.8088	4.16667	1.47925	4.75	0.675364	4.66667	2.90043	4.16667	0.384578	4.16667	2.37134	25.25	0.913892	4.16667	0.772414	4.16667	1.62518	4.16667	3.53078
4.25	0.21011	4.25	2.74442	4.25	0.159739	8.25	3.31681	7.66667	2.55389	5.5	2.23501	4.25	0.54594	5.08333	0.146762	4.25	0.215427	4.25	0.416043	4.33333	2.92242	5.16667	0.825762	4.25	1.328	4.25	0.621511	4.25	2.87982	5.58333	1.88495	4.25	1.51402	4.83333	0.767617	4.75	2.91384	4.25	0.324559	4.25	2.41785	25.3333	0.979199	4.25	0.773892	4.25	1.78611	4.25	3.59931
4.33333	0.299447	4.33333	2.76618	4.33333	0.195253	8.33333	3.38589	7.75	2.61336	5.58333	2.28871	4.33333	0.623641	5.16667	0.186942	4.33333	0.167265	4.33333	0.446692	4.41667	2.95447	5.25	0.932402	4.33333	1.30617	4.33333	0.620289	4.33333	2.97232	5.66667	1.97923	4.33333	1.52945	4.91667	0.777102	4.83333	2.97766	4.33333	0.373972	4.33333	2.52508	25.4167	1.07436	4.33333	0.778714	4.33333	1.92291	4.33333	3.68036
4.41667	0.365449	4.41667	2.78025	4.41667	0.23834	8.41667	3.42663	7.83333	2.65323	5.66667	2.35929	4.41667	0.710637	5.25	0.21042	4.41667	0.11866	4.41667	0.470697	4.5	2.91781	5.33333	1.01953	4.41667	1.32631	4.41667	0.560414	4.41667	3.07677	5.75	2.05943	4.41667	1.53957	5	0.752597	4.91667	2.90006	4.41667	0.453559	4.41667	2.60244	25.5	1.12858	4.41667	0.747991	4.41667	2.09069	4.41667	3.78085
4.5	0.369952	4.5	2.85019	4.5	0.355476	8.5	3.46321	7.91667	2.67393	5.75	2.41426	4.5	0.773207	5.33333	0.268642	4.5	0.110606	4.5	0.510842	4.58333	2.89835	5.41667	1.10555	4.5	1.33687	4.5	0.340745	4.5	3.15389	5.83333	2.16886	4.5	1.60435	5.08333	0.688704	5	2.88052	4.5	0.58144	4.5	2.66394	25.5833	1.21293	4.5	0.768239	4.5	2.18976	4.5	3.84637
4.58333	0.427041	4.58333	2.89871	4.58333	0.587955	8.58333	3.56351	8	2.67884	5.83333	2.40274	4.58333	0.796146	5.41667	0.297252	4.58333	0.069899	4.58333	0.577949	4.66667	2.95736	5.5	1.15289	4.58333	1.33868	4.58333	0.071564	4.58333	3.24318	5.91667	2.24199	4.58333	1.6733	5.16667	0.677854	5.08333	2.71528	4.58333	0.657099	4.58333	2.72139	25.6667	1.27086	4.58333	0.749736	4.58333	2.28345	4.58333	3.91703
4.66667	0.431791	4.66667	2.90266	4.66667	0.705564	8.66667	3.65601	8.08333	2.70224	5.91667	2.37781	4.66667	0.813452	5.5	0.321105	4.66667	0.04486	4.66667	0.668681	4.75	2.99127	5.58333	1.19443	4.66667	1.34041	4.66667	0.036166	4.66667	3.28322	6	2.31417	4.66667	1.70405	5.25	0.649451	5.16667	2.73001	4.66667	0.748653	4.66667	2.81361	25.75	1.29844	4.66667	0.774916	4.66667	2.32544	4.66667	3.95801
4.75	0.443354	4.75	2.92684	4.75	0.768963	8.75	3.70101	8.16667	2.73406	6	2.37224	4.75	0.875857	5.58333	0.334588	4.75	0.012527	4.75	0.720477	4.83333	2.98643	5.66667	1.23115	4.75	1.35993	4.75	0.022123	4.75	3.31888	6.08333	2.34609	4.75	1.58297	5.33333	0.633601	5.25	2.43448	4.75	0.75483	4.75	2.93388	25.8333	1.32455	4.75	0.789684	4.75	2.35787	4.75	4.00244
4.83333	0.301483	4.83333	2.95515	4.83333	0.812785	8.83333	3.73324	8.25	2.72607	6.08333	2.42807	4.83333	0.932268	5.66667	0.30577	4.83333	0.039558	4.83333	0.786946	4.91667	2.89296	5.75	1.29093	4.83333	1.40021	4.83333	0.057204	4.83333	3.35519	6.16667	2.38502	4.83333	1.47952	5.41667	0.628509	5.33333	2.13896	4.83333	0.795204	4.83333	3.01351	25.9167	1.37093	4.83333	0.834451	4.83333	2.36006	4.83333	4.08048
4.91667	0.190325	4.91667	3.00984	4.91667	0.821048	8.91667	3.76711	8.33333	2.70122	6.16667	2.4845	4.91667	0.978749	5.75	0.253583	4.91667	0.044455	4.91667	0.832904	5	2.87647	5.83333	1.37488	4.91667	1.39851	4.91667	0.084222	4.91667	3.3932	6.25	2.39895	4.91667	1.44911	5.5	0.646716	5.41667	2.00659	4.91667	0.678511	4.91667	3.05622	26	1.42814	4.91667	0.819688	4.91667	2.33783	4.91667	4.13149
5	0.164619	5	3.08686	5	0.584652	9	3.82648	8.41667	2.63428	6.25	2.53279	5	0.971682	5.83333	0.162745	5	0.056387	5	0.939526	5.08333	2.92751	5.91667	1.46786	5	1.41777	5	0.140034	5	3.45191	6.33333	2.39786	5	1.52756	5.58333	0.673475	5.5	1.89964	5	0.499277	5	3.10867	26.0833	1.51087	5	0.832081	5	2.39233	5	4.21974
5.08333	0.136561	5.08333	3.12956	5.08333	0.348255	9.08333	3.85211	8.5	2.55928	6.33333	2.57658	5.08333	0.994349	5.91667	0.075197	5.08333	0.056062	5.08333	0.999296	5.16667	3.01232	6	1.50507	5.08333	1.41153	5.08333	0.152327	5.08333	3.52489	6.41667	2.40526	5.08333	1.63594	5.66667	0.673387	5.58333	1.87725	5.08333	0.241321	5.08333	3.18231	26.1667	1.5724	5.08333	0.80087	5.08333	2.44478	5.08333	4.21144
5.16667	0.142037	5.16667	3.20263	5.16667	0.149349	9.16667	3.87844	8.58333	2.51544	6.41667	2.64107	5.16667	1.04273	6	0.037619	5.16667	0.070944	5.16667	1.04115	5.25	3.1245	6.08333	1.55813	5.16667	1.48642	5.16667	0.226306	5.16667	3.58465	6.5	2.32929	5.16667	1.72201	5.75	0.718524	5.66667	1.85761	5.16667	0.210944	5.16667	3.24834	26.25	1.66054	5.16667	0.84305	5.16667	2.56572	5.16667	4.23915
5.25	0.081458	5.25	3.20454	5.25	0.060056	9.25	3.91813	8.66667	2.50732	6.5	2.71416	5.25	1.11981	6.08333	0.030293	5.25	0.069592	5.25	1.06026	5.33333	3.18148	6.16667	1.58775	5.25	1.51776	5.25	0.223889	5.25	3.53089	6.58333	2.18933	5.25	1.82703	5.83333	0.774739	5.75	1.83394	5.25	0.295001	5.25	3.35525	26.3333	1.69495	5.25	0.862819	5.25	2.6417	5.25	4.24964
5.33333	0.020787	5.33333	3.24072	5.33333	0.102291	9.33333	4.0084	8.75	2.51947	6.58333	2.75535	5.33333	1.16888	6.16667	0.061706	5.33333	0.117352	5.33333	1.08808	5.41667	3.20831	6.25	1.48279	5.33333	1.60013	5.33333	0.323021	5.33333	3.4739	6.66667	1.9079	5.33333	1.87551	5.91667	0.811961	5.83333	1.81649	5.33333	0.395026	5.33333	3.46243	26.4167	1.75355	5.33333	0.923011	5.33333	2.69436	5.33333	4.3068
5.41667	0.025114	5.41667	3.27426	5.41667	0.136291	9.41667	4.08455	8.83333	2.52069	6.66667	2.81145	5.41667	1.19872	6.25	0.058189	5.41667	0.168593	5.41667	1.11408	5.5	3.17084	6.33333	1.37784	5.41667	1.6159	5.41667	0.384398	5.41667	3.42987	6.75	1.58231	5.41667	1.90392	6	0.824329	5.91667	1.7776	5.41667	0.509102	5.41667	3.59542	26.5	1.76831	5.41667	0.927563	5.41667	2.73061	5.41667	4.35342
5.5	0.056911	5.5	3.42859	5.5	0.166086	9.5	4.15452	8.91667	2.53292	6.75	2.85671	5.5	1.19945	6.33333	0.057094	5.5	0.280221	5.5	1.18568	5.58333	3.22985	6.41667	1.27288	5.5	1.70539	5.5	0.48644	5.5	3.48876	6.83333	1.47445	5.5	1.97245	6.08333	0.844794	6	1.7948	5.5	0.599935	5.5	3.74663	26.5833	1.87271	5.5	0.921727	5.5	2.75576	5.5	4.41114
5.58333	0.137207	5.58333	3.53819	5.58333	0.193261	9.58333	4.20532	9	2.52629	6.83333	2.9271	5.58333	1.18021	6.41667	0.053814	5.58333	0.280606	5.58333	1.2494	5.66667	3.27285	6.5	1.16792	5.58333	1.75688	5.58333	0.566533	5.58333	3.51626	6.91667	1.46863	5.58333	2.0536	6.16667	0.847164	6.08333	1.77722	5.58333	0.703911	5.58333	3.83887	26.6667	1.99039	5.58333	0.925737	5.58333	2.81429	5.58333	4.50426
5.66667	0.168157	5.66667	3.63102	5.66667	0.453615	9.66667	4.30209	9.08333	2.51876	6.91667	3.00109	5.66667	1.19839	6.5	0.049758	5.66667	0.299958	5.66667	1.32751	5.75	3.43226	6.58333	1.06297	5.66667	1.80629	5.66667	0.626409	5.66667	3.55097	7	1.5105	5.66667	2.19049	6.25	0.854104	6.16667	1.83251	5.66667	0.78983	5.66667	3.9356	26.75	2.0583	5.66667	0.939933	5.66667	2.93462	5.66667	4.61684
5.75	0.162132	5.75	3.69124	5.75	0.714017	9.75	4.37126	9.16667	2.50635	7	3.05993	5.75	1.21914	6.58333	0.086915	5.75	0.285328	5.75	1.34888	5.83333	3.52563	6.66667	0.958015	5.75	1.88483	5.75	0.70344	5.75	3.60404	7.08333	1.5646	5.75	2.2706	6.33333	0.855568	6.25	1.93225	5.75	0.866131	5.75	4.00268	26.8333	2.07236	5.75	0.963446	5.75	3.01843	5.75	4.7886
5.83333	0.160612	5.83333	3.77902	5.83333	0.813506	9.83333	4.44992	9.25	2.54814	7.08333	3.12475	5.83333	1.24169	6.66667	0.103927	5.83333	0.320206	5.83333	1.37149	5.91667	3.66083	6.75	0.831838	5.83333	1.93896	5.83333	0.835562	5.83333	3.71692	7.16667	1.62275	5.83333	2.35397	6.41667	0.794662	6.33333	2.02926	5.83333	0.90412	5.83333	4.06313	26.9167	2.02902	5.83333	0.979308	5.83333	3.1374	5.83333	4.88942
5.91667	0.173452	5.91667	3.90006	5.91667	0.865092	9.91667	4.49231	9.33333	2.59074	7.16667	3.19665	5.91667	1.28112	6.75	0.124937	5.91667	0.380014	5.91667	1.41254	6	3.62523	6.83333	0.800239	5.91667	1.98626	5.91667	0.907341	5.91667	3.77102	7.25	1.67211	5.91667	2.427	6.5	0.759671	6.41667	2.08499	5.91667	0.972655	5.91667	4.11392	27	1.97569	5.91667	1.00417	5.91667	3.23534	5.91667	4.94874
6	0.143198	6	3.97107	6	0.949298	10	4.59605	9.41667	2.63987	7.25	3.25315	6	1.31094	6.83333	0.131188	6	0.440324	6	1.49675	6.08333	3.76967	6.91667	0.784689	6	2.00743	6	1.10047	6	3.85754	7.33333	1.75728	6	2.49708	6.58333	0.682125	6.5	2.14162	6	1.00744	6	4.21379	27.0833	1.97052	6	1.04731	6	3.29542	6	4.98881
6.08333	0.069099	6.08333	4.03414	6.08333	1.0226	10.0833	4.64198	9.5	2.67394	7.33333	3.30746	6.08333	1.33718	6.91667	0.139563	6.08333	0.499127	6.08333	1.55685	6.16667	3.83853	7	0.784857	6.08333	2.03922	6.08333	1.16971	6.08333	3.92832	7.41667	1.86017	6.08333	2.56847	6.66667	0.704701	6.58333	2.27396	6.08333	1.00647	6.08333	4.29442	27.1667	1.95172	6.08333	1.10199	6.08333	3.32022	6.08333	5.06032
6.16667	0.033049	6.16667	4.06471	6.16667	1.17672	10.1667	4.7547	9.58333	2.69308	7.41667	3.31941	6.16667	1.60485	7	0.143907	6.16667	0.563893	6.16667	1.58603	6.25	3.96885	7.08333	0.790574	6.16667	1.98465	6.16667	1.29469	6.16667	3.98987	7.5	1.95383	6.16667	2.61417	6.75	0.721099	6.66667	2.31702	6.16667	0.984966	6.16667	4.37774	27.25	1.92149	6.16667	1.13909	6.16667	3.36413	6.16667	5.15229
6.25	0.065618	6.25	4.08567	6.25	1.23667	10.25	4.82553	9.66667	2.70484	7.5	3.33472	6.25	1.87252	7.08333	0.168987	6.25	0.599033	6.25	1.64249	6.33333	4.02288	7.16667	0.787245	6.25	1.94249	6.25	1.40572	6.25	4.01656	7.58333	2.02189	6.25	2.67414	6.83333	0.747574	6.75	2.31182	6.25	1.02712	6.25	4.4582	27.3333	1.88821	6.25	1.17017	6.25	3.44089	6.25	5.2124
6.33333	0.079861	6.33333	4.19596	6.33333	1.37724	10.3333	4.9667	9.75	2.74898	7.58333	3.31697	6.33333	2.1402	7.16667	0.182699	6.33333	0.640807	6.33333	1.70227	6.41667	4.10928	7.25	0.815212	6.33333	1.89176	6.33333	1.43149	6.33333	4.03221	7.66667	2.04867	6.33333	2.72387	6.91667	0.812221	6.83333	2.25063	6.33333	1.06171	6.33333	4.57039	27.4167	1.87757	6.33333	1.18266	6.33333	3.50692	6.33333	5.27744
6.41667	0.022664	6.41667	4.31991	6.41667	1.4703	10.4167	5.0524	9.83333	2.81145	7.66667	3.29293	6.41667	2.40787	7.25	0.226824	6.41667	0.648738	6.41667	1.77456	6.5	4.13126	7.33333	0.832215	6.41667	1.91395	6.41667	1.3704	6.41667	4.07456	7.75	2.08683	6.41667	2.76824	7	0.774189	6.91667	2.28048	6.41667	1.148	6.41667	4.64299	27.5	1.91577	6.41667	1.19763	6.41667	3.54354	6.41667	5.31627
6.5	0.042857	6.5	4.42045	6.5	1.56599	10.5	5.0892	9.91667	2.85092	7.75	3.2847	6.5	2.67554	7.33333	0.235198	6.5	0.706762	6.5	1.82882	6.58333	4.11282	7.41667	0.895755	6.5	1.92771	6.5	1.37354	6.5	4.10056	7.83333	2.10747	6.5	2.8106	7.08333	0.790145	7	2.32508	6.5	1.16568	6.5	4.68539	27.5833	1.94158	6.5	1.22415	6.5	3.5629	6.5	5.35955
6.58333	0.028304	6.58333	4.50869	6.58333	1.64305	10.5833	5.12279	10	2.82125	7.83333	3.33328	6.58333	2.73023	7.41667	0.257095	6.58333	0.767086	6.58333	1.87071	6.66667	4.14717	7.5	0.997855	6.58333	2.01777	6.58333	1.43614	6.58333	4.15752	7.91667	2.11054	6.58333	2.89303	7.16667	0.732698	7.08333	2.39893	6.58333	1.20346	6.58333	4.69981	27.6667	1.97277	6.58333	1.24197	6.58333	3.64847	6.58333	5.38983
6.66667	0.031005	6.66667	4.55468	6.66667	1.68098	10.6667	5.18465	10.0833	2.84809	7.91667	3.43034	6.66667	2.75849	7.5	0.25823	6.66667	0.876363	6.66667	1.9124	6.75	4.1316	7.58333	1.09996	6.66667	2.16826	6.66667	1.51802	6.66667	4.21208	8	2.05998	6.66667	2.98127	7.25	0.737708	7.16667	2.47878	6.66667	1.21735	6.66667	4.72124	27.75	1.95158	6.66667	1.24932	6.66667	3.73357	6.66667	5.41863
6.75	0.010278	6.75	4.60014	6.75	1.66816	10.75	5.25959	10.1667	2.88031	8	3.40778	6.75	2.77021	7.58333	0.279546	6.75	0.971845	6.75	1.96231	6.83333	4.198	7.66667	1.14672	6.75	2.29044	6.75	1.58259	6.75	4.34747	8.08333	2.00712	6.75	3.0688	7.33333	0.713034	7.25	2.5221	6.75	1.22456	6.75	4.79082	27.8333	1.9845	6.75	1.24033	6.75	3.81032	6.75	5.43406
6.83333	0.018591	6.83333	4.77397	6.83333	1.66334	10.8333	5.32422	10.25	2.92719	8.08333	3.47005	6.83333	2.82658	7.66667	0.270071	6.83333	1.08295	6.83333	2.02157	6.91667	4.26969	7.75	1.17538	6.83333	2.38461	6.83333	1.65786	6.83333	4.47971	8.16667	1.94762	6.83333	3.10987	7.41667	0.711609	7.33333	2.54378	6.83333	1.26901	6.83333	4.85598	27.9167	2.14735	6.83333	1.2274	6.83333	3.71408	6.83333	5.46893
6.91667	0.010214	6.91667	4.89223	6.91667	1.65609	10.9167	5.42804	10.3333	2.97407	8.16667	3.43145	6.91667	2.84194	7.75	0.283217	6.91667	1.1345	6.91667	2.09201	7	4.31584	7.83333	1.23248	6.91667	2.39955	6.91667	1.74581	6.91667	4.54924	8.25	1.94144	6.91667	3.15865	7.5	0.71644	7.41667	2.53808	6.91667	1.31316	6.91667	4.94224	28	2.27508	6.91667	1.25302	6.91667	3.41436	6.91667	5.50842
7	0.022813	7	4.99086	7	1.7694	11	5.5031	10.4167	3.06419	8.25	3.48216	7	2.76216	7.83333	0.27068	7	1.27228	7	2.20135	7.08333	4.34485	7.91667	1.33782	7	2.43876	7	1.89373	7	4.63842	8.33333	1.90341	7	3.1914	7.58333	0.727521	7.5	2.57379	7	1.38819	7	5.06416	28.0833	2.3315	7	1.25625	7	3.11464	7	5.55884
7.08333	0.014961	7.08333	5.07125	7.08333	1.87269	11.0833	5.56469	10.5	3.23956	8.33333	3.44581	7.08333	2.7104	7.91667	0.301152	7.08333	1.26885	7.08333	2.27846	7.16667	4.32104	8	1.39753	7.08333	2.45909	7.08333	1.96998	7.08333	4.66917	8.41667	1.8564	7.08333	3.21155	7.66667	0.75308	7.58333	2.64066	7.08333	1.4317	7.08333	5.13614	28.1667	2.33306	7.08333	1.2847	7.08333	2.81492	7.08333	5.57734
7.16667	0.042521	7.16667	5.09249	7.16667	1.64834	11.1667	5.60798	10.5833	3.35844	8.41667	3.47578	7.16667	2.65858	8	0.324591	7.16667	1.27298	7.16667	2.33953	7.25	4.39038	8.08333	1.42755	7.16667	2.52305	7.16667	2.06114	7.16667	4.74366	8.5	1.85537	7.16667	3.22824	7.75	0.753647	7.66667	2.7707	7.16667	1.48099	7.16667	5.18622	28.25	2.31787	7.16667	1.29006	7.16667	2.63414	7.16667	5.58254
7.25	0.122478	7.25	5.12458	7.25	1.424	11.25	5.66353	10.6667	3.48034	8.5	3.56294	7.25	2.67934	8.08333	0.337556	7.25	1.1896	7.25	2.37692	7.33333	4.48086	8.16667	1.43952	7.25	2.55028	7.25	2.10871	7.25	4.7751	8.58333	1.84316	7.25	3.24487	7.83333	0.770257	7.75	2.82831	7.25	1.54111	7.25	5.22581	28.3333	2.34128	7.25	1.30291	7.25	2.6118	7.25	5.56062
7.33333	0.17307	7.33333	5.12845	7.33333	1.19965	11.3333	5.74019	10.75	3.5484	8.58333	3.62336	7.33333	2.66966	8.16667	0.347563	7.33333	1.22642	7.33333	2.42837	7.41667	4.58133	8.25	1.45323	7.33333	2.65909	7.33333	2.21147	7.33333	4.87421	8.66667	1.80785	7.33333	3.25165	7.91667	0.756477	7.83333	2.90339	7.33333	1.62038	7.33333	5.26389	28.4167	2.35307	7.33333	1.31136	7.33333	2.64835	7.33333	5.54845
7.41667	0.154773	7.41667	5.15807	7.41667	1.0331	11.4167	5.82015	10.8333	3.60046	8.66667	3.72838	7.41667	2.72431	8.25	0.362456	7.41667	1.25128	7.41667	2.43597	7.5	4.6074	8.33333	1.4762	7.41667	2.68965	7.41667	2.28552	7.41667	4.95113	8.75	1.74945	7.41667	3.23939	8	0.727645	7.91667	2.92832	7.41667	1.66242	7.41667	5.28771	28.5	2.36933	7.41667	1.31468	7.41667	2.73331	7.41667	5.59053
7.5	0.194683	7.5	5.21756	7.5	1.03756	11.5	5.90606	10.9167	3.6629	8.75	3.69447	7.5	2.73921	8.33333	0.38916	7.5	1.27034	7.5	2.41791	7.58333	4.63415	8.41667	1.54788	7.5	2.76099	7.5	2.37093	7.5	5.00692	8.83333	1.74268	7.5	3.24618	8.08333	0.69935	8	2.98932	7.5	1.70989	7.5	5.31176	28.5833	2.36478	7.5	1.30621	7.5	2.83122	7.5	5.63737
7.58333	0.231265	7.58333	5.25299	7.58333	1.12616	11.5833	5.92786	11	3.74873	8.83333	3.7376	7.58333	2.77465	8.41667	0.4375	7.58333	1.28366	7.58333	2.38948	7.66667	4.6367	8.5	1.58382	7.58333	2.85802	7.58333	2.4581	7.58333	5.03657	8.91667	1.8698	7.58333	3.23495	8.16667	0.701845	8.08333	2.99176	7.58333	1.72182	7.58333	5.35388	28.6667	2.36216	7.58333	1.29952	7.58333	2.96825	7.58333	5.67626
7.66667	0.259215	7.66667	5.38153	7.66667	1.2654	11.6667	5.94422	11.0833	3.83974	8.91667	3.72465	7.66667	2.8033	8.5	0.476421	7.66667	1.29274	7.66667	2.40363	7.75	4.68355	8.58333	1.64921	7.66667	2.92576	7.66667	2.59042	7.66667	5.03548	9	2.00751	7.66667	3.1955	8.25	0.8181	8.16667	3.0211	7.66667	1.66301	7.66667	5.4311	28.75	2.38178	7.66667	1.30098	7.66667	3.10642	7.66667	5.72276
7.75	0.244342	7.75	5.54622	7.75	1.41242	11.75	5.97794	11.1667	3.88433	9	3.74285	7.75	2.87177	8.58333	0.504126	7.75	1.30527	7.75	2.42715	7.83333	4.74606	8.66667	1.6915	7.75	2.99377	7.75	2.63996	7.75	5.11899	9.08333	2.10961	7.75	3.15322	8.33333	0.867973	8.25	3.04682	7.75	1.52406	7.75	5.51492	28.8333	2.40645	7.75	1.30413	7.75	3.20797	7.75	5.80359
7.83333	0.151578	7.83333	5.74849	7.83333	1.55885	11.8333	6.03318	11.25	3.99877	9.08333	3.67312	7.83333	2.86599	8.66667	0.50002	7.83333	1.35733	7.83333	2.48581	7.91667	4.82471	8.75	1.78135	7.83333	3.08496	7.83333	2.65435	7.83333	5.14684	9.16667	2.16969	7.83333	3.14559	8.41667	1.01457	8.33333	3.08392	7.83333	1.37175	7.83333	5.61614	28.9167	2.40882	7.83333	1.29262	7.83333	3.29731	7.83333	5.86085
7.91667	0.073078	7.91667	5.9181	7.91667	1.70614	11.9167	6.1001	11.3333	4.122	9.16667	3.63865	7.91667	2.86817	8.75	0.499979	7.91667	1.40539	7.91667	2.60496	8	4.88916	8.83333	1.83273	7.91667	3.15782	7.91667	2.68286	7.91667	5.21587	9.25	2.22735	7.91667	3.18512	8.5	0.993258	8.41667	3.11029	7.91667	1.33227	7.91667	5.73598	29	2.45025	7.91667	1.29331	7.91667	3.35673	7.91667	5.88982
8	0.039581	8	5.81783	8	1.81341	12	6.15206	11.4167	4.19135	9.25	3.65407	8	2.82505	8.83333	0.524463	8	1.44584	8	2.73636	8.08333	4.90409	8.91667	1.88221	8	3.11855	8	2.78815	8	5.23943	9.33333	2.29215	8	3.20652	8.58333	1.12934	8.5	3.12834	8	1.35048	8	5.76712	29.0833	2.50135	8	1.30283	8	3.4015	8	5.85949
8.08333	0.085486	8.08333	5.87025	8.08333	1.94487	12.0833	6.24165	11.5	4.24216	9.33333	3.6768	8.08333	2.82864	8.91667	0.543927	8.08333	1.40741	8.08333	2.86963	8.16667	4.85466	9	1.87482	8.08333	3.02303	8.08333	2.79002	8.08333	5.43188	9.41667	2.33349	8.08333	3.22918	8.66667	1.13214	8.58333	3.22425	8.08333	1.35988	8.08333	5.78544	29.1667	2.54361	8.08333	1.32346	8.08333	3.48923	8.08333	5.88329
8.16667	0.114108	8.16667	5.84484	8.16667	2.03313	12.1667	6.26644	11.5833	4.31454	9.41667	3.76348	8.16667	2.79881	9	0.549231	8.16667	1.41293	8.16667	2.93885	8.25	4.86191	9.08333	1.92368	8.16667	2.95943	8.16667	2.84295	8.16667	5.60865	9.5	2.41107	8.16667	3.20933	8.75	1.25232	8.66667	3.48218	8.16667	1.37999	8.16667	5.65212	29.25	2.56773	8.16667	1.31336	8.16667	3.5493	8.16667	5.87995
8.25	0.170744	8.25	5.9197	8.25	2.13584	12.25	6.26948	11.6667	4.39478	9.5	3.80191	8.25	2.79692	9.08333	0.590452	8.25	1.39623	8.25	3.00424	8.33333	4.85031	9.16667	1.92401	8.25	2.94332	8.25	2.79111	8.25	5.69212	9.58333	2.43823	8.25	3.16941	8.83333	1.32026	8.75	3.63624	8.25	1.36802	8.25	5.4725	29.3333	2.57762	8.25	1.31119	8.25	3.63371	8.25	5.91166
8.33333	0.277525	8.33333	5.94703	8.33333	2.19259	12.3333	6.23906	11.75	4.11699	9.58333	3.87634	8.33333	2.80881	9.16667	0.593651	8.33333	1.41801	8.33333	3.11969	8.41667	4.88578	9.25	1.96952	8.33333	2.96334	8.33333	2.83472	8.33333	5.79307	9.66667	2.54895	8.33333	3.1312	8.91667	1.41609	8.83333	3.70212	8.33333	1.42602	8.33333	5.16685	29.4167	2.59834	8.33333	1.29574	8.33333	3.72699	8.33333	5.91495
8.41667	0.386615	8.41667	5.98928	8.41667	2.25714	12.4167	6.27252	11.8333	3.8392	9.66667	3.93269	8.41667	2.83568	9.25	0.608618	8.41667	1.44745	8.41667	3.2723	8.5	4.91123	9.33333	1.98203	8.41667	2.99536	8.41667	2.85392	8.41667	5.78507	9.75	2.62218	8.41667	3.09423	9	1.36507	8.91667	3.73071	8.41667	1.49079	8.41667	5.03537	29.5	2.62836	8.41667	1.28616	8.41667	3.80718	8.41667	6.02762
8.5	0.511881	8.5	6.05388	8.5	2.30573	12.5	6.30107	11.9167	3.56141	9.75	3.91061	8.5	2.85639	9.33333	0.616774	8.5	1.5316	8.5	3.36602	8.58333	4.95596	9.41667	2.04303	8.5	3.04965	8.5	2.93621	8.5	5.80686	9.83333	2.71213	8.5	3.11083	9.08333	1.28427	9	3.79188	8.5	1.54849	8.5	5.01628	29.5833	2.65419	8.5	1.29712	8.5	3.85334	8.5	6.16645
8.58333	0.611033	8.58333	6.12682	8.58333	2.37349	12.5833	6.31284	12	3.28362	9.83333	3.89229	8.58333	2.90871	9.41667	0.668723	8.58333	1.60539	8.58333	3.46606	8.66667	5.01761	9.5	1.92477	8.58333	3.10685	8.58333	2.95499	8.58333	5.90282	9.91667	2.74954	8.58333	3.11171	9.16667	1.12511	9.08333	3.85149	8.58333	1.57284	8.58333	5.04759	29.6667	2.67807	8.58333	1.31184	8.58333	3.88796	8.58333	6.22606
8.66667	0.611324	8.66667	6.17188	8.66667	2.42064	12.6667	6.34039	12.0833	3.00582	9.91667	3.87777	8.66667	2.91679	9.5	0.684692	8.66667	1.65015	8.66667	3.54844	8.75	5.03716	9.58333	1.80651	8.66667	3.16201	8.66667	2.94614	8.66667	5.97119	10	2.80354	8.66667	3.17083	9.25	1.02061	9.16667	3.93626	8.66667	1.57125	8.66667	5.10296	29.75	2.69024	8.66667	1.32703	8.66667	3.95867	8.66667	6.29207
8.75	0.56883	8.75	6.15704	8.75	2.46635	12.75	6.35108	12.1667	2.92972	10	3.95025	8.75	2.94154	9.58333	0.728552	8.75	1.7235	8.75	3.62514	8.83333	5.05837	9.66667	1.68825	8.75	3.22741	8.75	2.92309	8.75	6.05383	10.0833	2.86426	8.75	3.21456	9.33333	1.03323	9.25	3.9207	8.75	1.56585	8.75	5.22378	29.8333	2.73308	8.75	1.33319	8.75	4.02639	8.75	6.3066
8.83333	0.581749	8.83333	6.22679	8.83333	2.54922	12.8333	6.37931	12.25	2.89312	10.0833	3.93866	8.83333	2.96386	9.66667	0.765028	8.83333	1.79382	8.83333	3.68701	8.91667	5.07192	9.75	1.56999	8.83333	3.28199	8.83333	2.92796	8.83333	6.04605	10.1667	2.90872	8.83333	3.27485	9.41667	1.0222	9.33333	4.00496	8.83333	1.56713	8.83333	5.29326	29.9167	2.75221	8.83333	1.33922	8.83333	4.10253	8.83333	6.3225
8.91667	0.557544	8.91667	6.27493	8.91667	2.65795	12.9167	6.35904	12.3333	2.94689	10.1667	3.89911	8.91667	2.99705	9.75	0.831193	8.91667	1.84647	8.91667	3.73862	9	5.12249	9.83333	1.59407	8.91667	3.24329	8.91667	2.92015	8.91667	6.08129	10.25	2.95277	8.91667	3.29607	9.5	1.04262	9.41667	4.11182	8.91667	1.62659	8.91667	5.35559	30	2.76445	8.91667	1.34755	8.91667	4.15194	8.91667	6.31643
9	0.555473	9	6.31822	9	2.76568	13	6.39674	12.4167	2.94417	10.25	3.83934	9	3.00914	9.83333	0.850939	9	1.84245	9	3.79088	9.08333	5.17266	9.91667	1.66364	9	3.1347	9	2.95117	9	6.07316	10.3333	3.00206	9	3.29772	9.58333	1.02769	9.5	4.15968	9	1.63656	9	5.45923	30.0833	2.76138	9	1.36299	9	4.1854	9	6.38701
9.08333	0.507024	9.08333	6.32897	9.08333	2.84664	13.0833	6.41783	12.5	2.95003	10.3333	3.86886	9.08333	2.99397	9.91667	0.839332	9.08333	1.81705	9.08333	3.84176	9.16667	5.19449	10	1.7053	9.08333	3.03997	9.08333	3.00685	9.08333	6.13571	10.4167	3.06448	9.08333	3.33073	9.66667	1.04836	9.58333	4.20527	9.08333	1.61343	9.08333	5.53699	30.1667	2.76569	9.08333	1.36629	9.08333	4.23575	9.08333	6.54358
9.16667	0.486674	9.16667	6.33138	9.16667	2.8649	13.1667	6.46831	12.5833	3.01688	10.4167	3.93747	9.16667	2.99294	10	0.747349	9.16667	1.78712	9.16667	3.91434	9.25	5.25805	10.0833	1.69151	9.16667	3.09338	9.16667	3.08844	9.16667	6.17446	10.5	3.15799	9.16667	3.37798	9.75	1.10131	9.66667	4.33003	9.16667	1.50164	9.16667	5.6195	30.25	2.78294	9.16667	1.35674	9.16667	4.29867	9.16667	6.66477
9.25	0.464857	9.25	6.38365	9.25	2.88234	13.25	6.50942	12.6667	3.14671	10.5	3.95499	9.25	2.99766	10.0833	0.681808	9.25	1.80089	9.25	3.99225	9.33333	5.34017	10.1667	1.68043	9.25	3.16945	9.25	3.11788	9.25	6.21838	10.5833	3.20294	9.25	3.41794	9.83333	1.09229	9.75	4.45936	9.25	1.39119	9.25	5.6575	30.3333	2.79859	9.25	1.33013	9.25	4.35682	9.25	6.68466
9.33333	0.476151	9.33333	6.46529	9.33333	2.90322	13.3333	6.52795	12.75	3.17408	10.5833	3.9363	9.33333	3.01037	10.1667	0.618883	9.33333	1.85559	9.33333	4.07047	9.41667	5.42687	10.25	1.73148	9.33333	3.2364	9.33333	3.13912	9.33333	6.23361	10.6667	3.26236	9.33333	3.45634	9.91667	1.11648	9.83333	4.51225	9.33333	1.31085	9.33333	5.72168	30.4167	2.79563	9.33333	1.32012	9.33333	4.43252	9.33333	6.74799
9.41667	0.544871	9.41667	6.53134	9.41667	2.88483	13.4167	6.57699	12.8333	3.175	10.6667	3.91313	9.41667	3.03183	10.25	0.612362	9.41667	1.88916	9.41667	4.10497	9.5	5.49096	10.3333	1.85442	9.41667	3.30386	9.41667	3.21918	9.41667	6.3141	10.75	3.27583	9.41667	3.49928	10	1.20998	9.91667	4.61213	9.41667	1.26501	9.41667	5.80146	30.5	2.81177	9.41667	1.34272	9.41667	4.47501	9.41667	6.77896
9.5	0.684978	9.5	6.58558	9.5	2.87895	13.5	6.74866	12.9167	3.09911	10.75	3.95117	9.5	3.04417	10.3333	0.635102	9.5	1.90094	9.5	4.11577	9.58333	5.52595	10.4167	1.93765	9.5	3.3531	9.5	3.30653	9.5	6.44438	10.8333	3.35779	9.5	3.54545	10.0833	1.29428	10	4.85258	9.5	1.27037	9.5	5.90593	30.5833	2.84182	9.5	1.39573	9.5	4.51816	9.5	6.82682
9.58333	0.780808	9.58333	6.66333	9.58333	2.88145	13.5833	6.84694	13	3.0551	10.8333	3.99019	9.58333	3.06292	10.4167	0.668138	9.58333	1.87167	9.58333	4.11535	9.66667	5.57975	10.5	2.0134	9.58333	3.42965	9.58333	3.39926	9.58333	6.53202	10.9167	3.37787	9.58333	3.58852	10.1667	1.29638	10.0833	4.98728	9.58333	1.26768	9.58333	6.01659	30.6667	2.88791	9.58333	1.43589	9.58333	4.57805	9.58333	6.81751
9.66667	0.906042	9.66667	6.74998	9.66667	2.92833	13.6667	6.88038	13.0833	3.02009	10.9167	4.03032	9.66667	3.01626	10.5	0.713052	9.66667	1.82523	9.66667	4.14098	9.75	5.59999	10.5833	2.07281	9.66667	3.47237	9.66667	3.47413	9.66667	6.60549	11	3.40524	9.66667	3.6442	10.25	1.32064	10.1667	5.08432	9.66667	1.29674	9.66667	6.1338	30.75	2.88275	9.66667	1.45082	9.66667	4.62252	9.66667	6.89197
9.75	1.04195	9.75	6.79046	9.75	2.94831	13.75	6.89227	13.1667	2.975	11	4.01876	9.75	2.9992	10.5833	0.813776	9.75	1.7995	9.75	4.17447	9.83333	5.65848	10.6667	2.14897	9.75	3.52267	9.75	3.52274	9.75	6.64428	11.0833	3.51197	9.75	3.73857	10.3333	1.40079	10.25	5.13515	9.75	1.30121	9.75	6.19651	30.8333	2.88913	9.75	1.46259	9.75	4.67021	9.75	6.9275
9.83333	1.15853	9.83333	6.82656	9.83333	3.01279	13.8333	6.98678	13.25	2.97794	11.0833	4.02128	9.83333	2.94288	10.6667	0.895682	9.83333	1.79075	9.83333	4.26742	9.91667	5.71063	10.75	2.20984	9.83333	3.5301	9.83333	3.57829	9.83333	7.23795	11.1667	3.63752	9.83333	3.80136	10.4167	1.48318	10.3333	5.17295	9.83333	1.33506	9.83333	6.24101	30.9167	2.8903	9.83333	1.50106	9.83333	4.69167	9.83333	7.01069
9.91667	1.19546	9.91667	6.88859	9.91667	3.04685	13.9167	7.06514	13.3333	3.01919	11.1667	4.06288	9.91667	2.89843	10.75	0.965655	9.91667	1.83179	9.91667	4.38896	10	5.78297	10.8333	2.23398	9.91667	3.55593	9.91667	3.61329	9.91667	7.83162	11.25	3.68473	9.91667	3.82048	10.5	1.56368	10.4167	5.18909	9.91667	1.36233	9.91667	6.32377	31	2.8891	9.91667	1.51123	9.91667	4.77833	9.91667	7.01369
10	1.22215	10	6.97331	10	3.17291	14	7.18025	13.4167	3.09921	11.25	4.13101	10	2.79799	10.8333	0.9818	10	1.84407	10	4.48645	10.0833	5.83649	10.9167	2.25128	10	3.55312	10	3.67388	10	8.4253	11.3333	3.71541	10	3.82856	10.5833	1.63257	10.5	5.21662	10	1.41852	10	6.44659	31.0833	2.86807	10	1.52876	10	4.85451	10	7.08483
10.0833	1.2078	10.0833	7.04426	10.0833	3.24905	14.0833	7.23027	13.5	3.18735	11.3333	4.14072	10.0833	2.68339	10.9167	0.970662	10.0833	1.85397	10.0833	4.54448	10.1667	5.87933	11	2.30218	10.0833	3.54692	10.0833	3.73465	10.0833	8.44794	11.4167	3.79083	10.0833	3.82997	10.6667	1.6763	10.5833	5.25758	10.0833	1.40144	10.0833	6.53696	31.1667	2.86888	10.0833	1.52596	10.0833	4.92601	10.0833	7.15671
10.1667	1.24443	10.1667	7.09552	10.1667	3.36548	14.1667	7.24582	13.5833	3.25894	11.4167	4.08896	10.1667	2.66555	11	0.949978	10.1667	1.8745	10.1667	4.56854	10.25	5.95443	11.0833	2.38398	10.1667	3.53823	10.1667	3.75023	10.1667	8.42254	11.5	3.86405	10.1667	3.8499	10.75	1.69481	10.6667	5.3484	10.1667	1.35167	10.1667	6.59427	31.25	2.87377	10.1667	1.54588	10.1667	4.95393	10.1667	7.30061
10.25	1.29026	10.25	7.1961	10.25	3.4791	14.25	7.2101	13.6667	3.33798	11.5	4.08634	10.25	2.65774	11.0833	0.931358	10.25	1.89453	10.25	4.59955	10.3333	5.98024	11.1667	2.4382	10.25	3.5702	10.25	3.74172	10.25	8.37938	11.5833	3.90524	10.25	3.87839	10.8333	1.69991	10.75	5.43114	10.25	1.31045	10.25	6.63598	31.3333	2.87326	10.25	1.54582	10.25	4.9699	10.25	7.36377
10.3333	1.35273	10.3333	7.2642	10.3333	3.55115	14.3333	7.17629	13.75	3.42196	11.5833	4.05696	10.3333	2.7395	11.1667	0.907677	10.3333	1.9165	10.3333	4.64757	10.4167	6.00885	11.25	2.44223	10.3333	3.65068	10.3333	3.75485	10.3333	8.33362	11.6667	3.90988	10.3333	3.91178	10.9167	1.68267	10.8333	5.48792	10.3333	1.2877	10.3333	6.66182	31.4167	2.8602	10.3333	1.55226	10.3333	4.99338	10.3333	7.44614
10.4167	1.4559	10.4167	7.32701	10.4167	3.62401	14.4167	7.15282	13.8333	3.45221	11.6667	4.09098	10.4167	2.77304	11.25	0.894489	10.4167	1.91537	10.4167	4.68798	10.5	5.99041	11.3333	2.45358	10.4167	3.66811	10.4167	3.8045	10.4167	8.34755	11.75	3.91652	10.4167	3.97818	11	1.71594	10.9167	5.55328	10.4167	1.33112	10.4167	6.75742	31.5	2.85343	10.4167	1.54944	10.4167	5.02014	10.4167	7.49129
10.5	1.57705	10.5	7.4481	10.5	3.68493	14.5	7.13623	13.9167	3.49078	11.75	4.03657	10.5	2.8094	11.3333	0.886595	10.5	1.94044	10.5	4.74243	10.5833	5.83247	11.4167	2.48182	10.5	3.68023	10.5	3.88689	10.5	8.37803	11.8333	3.94451	10.5	4.02134	11.0833	1.72888	11	5.64946	10.5	1.34683	10.5	6.84315	31.5833	2.86072	10.5	1.57227	10.5	5.0718	10.5	7.5115
10.5833	1.68541	10.5833	7.55601	10.5833	3.78752	14.5833	7.16163	14	3.51123	11.8333	4.0626	10.5833	2.80508	11.4167	0.888711	10.5833	1.94499	10.5833	4.80181	10.6667	5.67453	11.5	2.5425	10.5833	3.65376	10.5833	3.92013	10.5833	8.35806	11.9167	3.98067	10.5833	4.08404	11.1667	1.75556	11.0833	5.77974	10.5833	1.37137	10.5833	6.94108	31.6667	2.84145	10.5833	1.6082	10.5833	5.14525	10.5833	7.48957
10.6667	1.81191	10.6667	7.64449	10.6667	3.89638	14.6667	7.168	14.0833	3.57144	11.9167	4.05898	10.6667	2.83168	11.5	0.887332	10.6667	1.94719	10.6667	4.8633	10.75	5.51659	11.5833	2.63626	10.6667	3.6471	10.6667	3.89613	10.6667	8.34985	12	4.08922	10.6667	4.13228	11.25	1.78738	11.1667	5.91411	10.6667	1.39514	10.6667	6.9881	31.75	2.8563	10.6667	1.62081	10.6667	5.18897	10.6667	7.4429
10.75	1.91683	10.75	7.78917	10.75	3.96888	14.75	7.08942	14.1667	3.59236	12	4.12206	10.75	2.83362	11.5833	0.89154	10.75	1.90748	10.75	4.93109	10.8333	5.35865	11.6667	2.70035	10.75	3.54307	10.75	3.8243	10.75	8.33028	12.0833	4.14679	10.75	4.23894	11.3333	1.84532	11.25	5.93246	10.75	1.45684	10.75	7.0641	31.8333	2.87183	10.75	1.61573	10.75	5.23785	10.75	7.42929
10.8333	1.9431	10.8333	7.89228	10.8333	4.04091	14.8333	7.06779	14.25	3.58639	12.0833	4.1415	10.8333	2.82677	11.6667	0.954345	10.8333	1.92097	10.8333	4.98579	10.9167	5.20072	11.75	2.7088	10.8333	3.35524	10.8333	3.71002	10.8333	8.70248	12.1667	4.20282	10.8333	4.29439	11.4167	1.94096	11.3333	5.96386	10.8333	1.48628	10.8333	7.077	31.9167	2.91539	10.8333	1.59312	10.8333	5.27524	10.8333	7.45722
10.9167	1.98953	10.9167	7.965	10.9167	4.07306	14.9167	7.1145	14.3333	3.55439	12.1667	4.19564	10.9167	2.83346	11.75	1.01625	10.9167	1.96028	10.9167	5.02301	11	5.08111	11.8333	2.77271	10.9167	3.13217	10.9167	3.68832	10.9167	8.71637	12.25	4.19744	10.9167	4.33438	11.5	2.01934	11.4167	5.95642	10.9167	1.49183	10.9167	7.12297	32	2.92091	10.9167	1.6126	10.9167	5.35012	10.9167	7.4781
11	2.06971	11	7.9651	11	4.156	15	7.23659	14.4167	3.52431	12.25	4.20577	11	2.8321	11.8333	1.08403	11	1.97629	11	5.03302	11.0833	5.00357	11.9167	2.81578	11	3.11897	11	3.70543	11	8.71885	12.3333	4.21789	11	4.34077	11.5833	2.0815	11.5	5.97145	11	1.47477	11	7.18337	32.0833	2.91639	11	1.64543	11	5.38358	11	7.51231
11.0833	2.12632	11.0833	8.05318	11.0833	4.23274	15.0833	7.37085	14.5	3.58176	12.3333	4.2263	11.0833	2.85717	11.9167	1.08769	11.0833	1.91981	11.0833	5.03684	11.1667	4.96467	12	2.87623	11.0833	3.14057	11.0833	3.76512	11.0833	8.71838	12.4167	4.28741	11.0833	4.35562	11.6667	2.07617	11.5833	6.00695	11.0833	1.48267	11.0833	7.2379	32.1667	2.93735	11.0833	1.70878	11.0833	5.43945	11.0833	7.5017
11.1667	2.15342	11.1667	8.13841	11.1667	4.33267	15.1667	7.50188	14.5833	3.68037	12.4167	4.23492	11.1667	2.87715	12	0.975179	11.1667	1.85466	11.1667	5.05723	11.25	4.94884	12.0833	2.88208	11.1667	3.19046	11.1667	3.82828	11.1667	8.71538	12.5	4.29268	11.1667	4.40415	11.75	2.12356	11.6667	6.03606	11.1667	1.49529	11.1667	7.30771	32.25	2.95088	11.1667	1.73722	11.1667	5.50639	11.1667	7.4833
11.25	2.17538	11.25	8.23016	11.25	4.39937	15.25	7.57383	14.6667	3.8271	12.5	4.25624	11.25	2.93733	12.0833	0.88258	11.25	1.84177	11.25	5.08326	11.3333	4.92563	12.1667	2.95824	11.25	3.25113	11.25	3.86381	11.25	8.72789	12.5833	4.33115	11.25	4.44525	11.8333	2.21406	11.75	6.05855	11.25	1.4798	11.25	7.34894	32.3333	3.01823	11.25	1.75037	11.25	5.57272	11.25	7.46354
11.3333	2.23273	11.3333	8.35183	11.3333	4.45961	15.3333	7.57825	14.75	3.90311	12.5833	4.27399	11.3333	2.94273	12.1667	0.860375	11.3333	1.86834	11.3333	5.129	11.4167	4.91441	12.25	3.05256	11.3333	3.2686	11.3333	3.85951	11.3333	8.73401	12.6667	4.21858	11.3333	4.49834	11.9167	2.28585	11.8333	6.08254	11.3333	1.49879	11.3333	7.41396	32.4167	3.02973	11.3333	1.7665	11.3333	5.6253	11.3333	7.43973
11.4167	2.29298	11.4167	8.44112	11.4167	4.51367	15.4167	7.62989	14.8333	3.98971	12.6667	4.31713	11.4167	2.93879	12.25	0.871846	11.4167	1.90918	11.4167	5.15363	11.5	4.86145	12.3333	3.15171	11.4167	3.30582	11.4167	3.85961	11.4167	8.72434	12.75	4.25635	11.4167	4.57388	12	2.34956	11.9167	6.37279	11.4167	1.49253	11.4167	7.44017	32.5	3.06092	11.4167	1.79026	11.4167	5.69055	11.4167	7.47735
11.5	2.40485	11.5	8.46584	11.5	4.45867	15.5	7.68662	14.9167	3.9984	12.75	4.33795	11.5	2.89194	12.3333	0.88159	11.5	1.92981	11.5	5.18787	11.5833	4.81952	12.4167	3.20038	11.5	3.32154	11.5	3.87612	11.5	8.71308	12.8333	4.24594	11.5	4.69216	12.0833	2.39866	12	6.66305	11.5	1.57553	11.5	7.41971	32.5833	3.05511	11.5	1.79965	11.5	5.80084	11.5	7.47524
11.5833	2.50151	11.5833	8.44537	11.5833	4.16919	15.5833	7.62875	15	3.98444	12.8333	4.37306	11.5833	2.90976	12.4167	0.877905	11.5833	1.93567	11.5833	5.20712	11.6667	4.7641	12.5	3.23695	11.5833	3.40835	11.5833	3.93278	11.5833	8.72086	12.9167	4.33533	11.5833	4.82443	12.1667	2.56554	12.0833	6.83089	11.5833	1.61682	11.5833	7.32288	32.6667	3.06796	11.5833	1.78929	11.5833	5.92378	11.5833	7.45346
11.6667	2.63065	11.6667	8.51262	11.6667	3.8797	15.6667	7.40482	15.0833	3.95134	12.9167	4.35249	11.6667	2.9426	12.5	0.88083	11.6667	1.96757	11.6667	5.19464	11.75	4.72072	12.5833	3.25556	11.6667	3.49383	11.6667	3.93441	11.6667	8.72726	13	4.41693	11.6667	4.91981	12.25	2.63512	12.1667	6.87371	11.6667	1.68981	11.6667	7.18303	32.75	3.07787	11.6667	1.79214	11.6667	6.00278	11.6667	7.37
11.75	2.72876	11.75	8.57377	11.75	3.68755	15.75	7.22937	15.1667	3.99923	13	4.37692	11.75	3.00128	12.5833	0.932328	11.75	1.96536	11.75	5.15574	11.8333	4.72915	12.6667	3.35376	11.75	3.576	11.75	3.98036	11.75	8.76236	13.0833	4.4544	11.75	5.00198	12.3333	2.69696	12.25	6.92893	11.75	1.70036	11.75	7.09824	32.8333	3.04333	11.75	1.82844	11.75	6.08344	11.75	7.33904
11.8333	2.77737	11.8333	8.58574	11.8333	3.60085	15.8333	7.22774	15.25	4.01898	13.0833	4.37829	11.8333	3.0396	12.6667	0.998034	11.8333	1.98693	11.8333	5.12055	11.9167	4.81397	12.75	3.42876	11.8333	3.63392	11.8333	3.9711	11.8333	8.76042	13.1667	4.38467	11.8333	5.24289	12.4167	2.72622	12.3333	6.94681	11.8333	1.72589	11.8333	7.123	32.9167	3.03422	11.8333	1.87604	11.8333	6.17669	11.8333	7.34159
11.9167	2.75516	11.9167	8.66535	11.9167	3.6024	15.9167	7.21694	15.3333	4.05307	13.1667	4.40509	11.9167	3.07974	12.75	1.0166	11.9167	1.99575	11.9167	5.13439	12	4.90831	12.8333	3.47311	11.9167	3.62818	11.9167	3.94394	11.9167	8.77041	13.25	4.26227	11.9167	5.302	12.5	2.7738	12.4167	7.01193	11.9167	1.72921	11.9167	7.19897	33	3.03609	11.9167	1.91543	11.9167	6.24294	11.9167	7.37564
12	2.746	12	8.73493	12	3.64441	16	7.24453	15.4167	4.03835	13.25	4.47885	12	3.05799	12.8333	1.01086	12	2.00027	12	5.20096	12.0833	4.97778	12.9167	3.47652	12	3.56894	12	3.90659	12	8.76327	13.3333	4.14214	12	5.30666	12.5833	2.83575	12.5	7.09718	12	1.73442	12	7.27785	33.0833	3.08146	12	1.93271	12	6.32003	12	7.44273
12.0833	2.75918	12.0833	8.76758	12.0833	3.69715	16.0833	7.26475	15.5	4.13673	13.3333	4.52085	12.0833	3.03299	12.9167	0.999184	12.0833	1.99987	12.0833	5.26368	12.1667	4.98815	13	3.47976	12.0833	3.46981	12.0833	3.88183	12.0833	8.77887	13.4167	4.31721	12.0833	5.18297	12.6667	2.85544	12.5833	7.21442	12.0833	1.7657	12.0833	7.32192	33.1667	3.10978	12.0833	1.93412	12.0833	6.3873	12.0833	7.49006
12.1667	2.75498	12.1667	8.7231	12.1667	3.76407	16.1667	7.33237	15.5833	4.20926	13.4167	4.59594	12.1667	3.0056	13	0.997854	12.1667	1.96784	12.1667	5.36921	12.25	4.99889	13.0833	3.51789	12.1667	3.25793	12.1667	3.90548	12.1667	8.77461	13.5	4.31754	12.1667	5.18541	12.75	2.90564	12.6667	7.30642	12.1667	1.80523	12.1667	7.35644	33.25	3.11992	12.1667	1.9232	12.1667	6.4713	12.1667	7.51798
12.25	2.77222	12.25	8.66821	12.25	3.82107	16.25	7.36471	15.6667	4.32504	13.5	4.62267	12.25	3.02548	13.0833	1.05934	12.25	1.98925	12.25	5.46371	12.3333	5.00111	13.1667	3.51096	12.25	3.06715	12.25	3.90942	12.25	8.77083	13.5833	4.38616	12.25	5.26127	12.8333	2.91782	12.75	7.3492	12.25	1.86474	12.25	7.40465	33.3333	3.11702	12.25	1.92981	12.25	6.5224	12.25	7.51352
12.3333	2.84233	12.3333	8.63929	12.3333	3.90854	16.3333	7.37009	15.75	4.3391	13.5833	4.63093	12.3333	3.04284	13.1667	1.18041	12.3333	2.02059	12.3333	5.56764	12.4167	5.03095	13.25	3.54042	12.3333	3.03801	12.3333	3.92681	12.3333	8.76221	13.6667	4.32115	12.3333	5.32058	12.9167	2.87238	12.8333	7.40046	12.3333	1.89362	12.3333	7.43759	33.4167	3.12396	12.3333	1.92796	12.3333	6.58862	12.3333	7.51461
12.4167	2.94752	12.4167	8.73014	12.4167	3.9593	16.4167	7.37092	15.8333	4.33407	13.6667	4.62018	12.4167	3.04442	13.25	1.16472	12.4167	2.08812	12.4167	5.64044	12.5	5.01413	13.3333	3.55479	12.4167	3.09964	12.4167	3.94682	12.4167	8.79502	13.75	4.35084	12.4167	5.38043	13	2.77143	12.9167	7.41483	12.4167	1.9315	12.4167	7.47322	33.5	3.14351	12.4167	1.9472	12.4167	6.6753	12.4167	7.53423
12.5	3.05546	12.5	8.85368	12.5	4.05534	16.5	7.37675	15.9167	4.31737	13.75	4.67773	12.5	3.08762	13.3333	1.13182	12.5	2.09015	12.5	5.71543	12.5833	5.00129	13.4167	3.62802	12.5	3.1806	12.5	3.98803	12.5	8.80644	13.8333	4.35274	12.5	5.43297	13.0833	2.70233	13	7.50117	12.5	1.9301	12.5	7.48817	33.5833	3.19873	12.5	1.94823	12.5	6.75804	12.5	7.56923
12.5833	3.08537	12.5833	9.02998	12.5833	4.12826	16.5833	7.38207	16	4.29867	13.8333	4.78098	12.5833	3.12342	13.4167	1.12723	12.5833	2.08117	12.5833	5.81853	12.6667	5.00491	13.5	3.70319	12.5833	3.21993	12.5833	4.0355	12.5833	8.81658	13.9167	4.41337	12.5833	5.47829	13.1667	2.69292	13.0833	7.56391	12.5833	1.97256	12.5833	7.52139	33.6667	3.23479	12.5833	1.97805	12.5833	6.79606	12.5833	7.66086
12.6667	3.15422	12.6667	9.08359	12.6667	4.17927	16.6667	7.35583	16.0833	4.28948	13.9167	4.87081	12.6667	3.1657	13.5	1.14918	12.6667	1.99482	12.6667	5.88102	12.75	5.0232	13.5833	3.79108	12.6667	3.28337	12.6667	4.03168	12.6667	8.80342	14	4.46034	12.6667	5.51382	13.25	2.74805	13.1667	7.69306	12.6667	2.01738	12.6667	7.51399	33.75	3.23642	12.6667	1.99574	12.6667	6.84029	12.6667	7.77812
12.75	3.1607	12.75	9.27333	12.75	4.21863	16.75	7.34308	16.1667	4.28468	14	4.88036	12.75	3.18698	13.5833	1.17313	12.75	2.03452	12.75	5.94063	12.8333	5.03409	13.6667	3.85523	12.75	3.33651	12.75	4.09095	12.75	8.81027	14.0833	4.45292	12.75	5.54746	13.3333	2.78689	13.25	7.74403	12.75	2.10138	12.75	7.55472	33.8333	3.19904	12.75	2.00526	12.75	6.88809	12.75	7.88273
12.8333	3.28229	12.8333	9.39067	12.8333	4.26965	16.8333	7.34058	16.25	4.29648	14.0833	4.85725	12.8333	3.21904	13.6667	1.1757	12.8333	2.02713	12.8333	6.00888	12.9167	4.98648	13.75	3.95896	12.8333	3.37473	12.8333	4.1939	12.8333	8.81753	14.1667	4.49781	12.8333	5.59722	13.4167	2.82435	13.3333	7.78252	12.8333	2.18633	12.8333	7.59674	33.9167	3.15961	12.8333	2.00809	12.8333	6.98243	12.8333	7.94875
12.9167	3.40823	12.9167	9.50771	12.9167	4.34563	16.9167	7.3694	16.3333	4.3119	14.1667	4.86461	12.9167	3.25073	13.75	1.20026	12.9167	2.03377	12.9167	6.07402	13	4.99164	13.8333	4.01637	12.9167	3.39733	12.9167	4.38933	12.9167	8.83635	14.25	4.37972	12.9167	5.60922	13.5	2.85374	13.4167	7.82153	12.9167	2.24953	12.9167	7.60669	34	3.14316	12.9167	2.03641	12.9167	7.09153	12.9167	8.03232
13	3.50289	13	9.48665	13	4.42433	17	7.42647	16.4167	4.32501	14.25	4.88071	13	3.24422	13.8333	1.23785	13	1.96799	13	6.13468	13.0833	4.99983	13.9167	4.10659	13	3.46866	13	4.57691	13	8.83356	14.3333	4.31104	13	5.61541	13.5833	2.89975	13.5	7.9086	13	2.35026	13	7.782	34.0833	3.14323	13	2.03624	13	7.2174	13	8.07669
13.0833	3.54199	13.0833	9.55728	13.0833	4.49217	17.0833	7.44984	16.5	4.3249	14.3333	4.98945	13.0833	3.23825	13.9167	1.26556	13.0833	1.96035	13.0833	6.16492	13.1667	5.02599	14	4.13346	13.0833	3.50762	13.0833	4.54487	13.0833	8.84665	14.4167	4.33382	13.0833	5.62563	13.6667	2.93176	13.5833	8.22673	13.0833	2.41813	13.0833	8.06479	34.1667	3.14527	13.0833	2.04315	13.0833	7.28769	13.0833	8.11669
13.1667	3.55512	13.1667	9.65725	13.1667	4.53938	17.1667	7.45985	16.5833	4.3343	14.4167	5.05293	13.1667	3.24742	14	1.33864	13.1667	1.98681	13.1667	6.18511	13.25	5.01122	14.0833	4.1708	13.1667	3.59803	13.1667	4.46699	13.1667	8.83749	14.5	4.37113	13.1667	5.6547	13.75	2.99163	13.6667	8.35146	13.1667	2.49888	13.1667	8.34758	34.25	3.13101	13.1667	2.05516	13.1667	7.33955	13.1667	8.11169
13.25	3.61682	13.25	9.85612	13.25	4.60599	17.25	7.42942	16.6667	4.35945	14.5	5.07388	13.25	3.29981	14.0833	1.38411	13.25	1.99269	13.25	6.19884	13.3333	5.00116	14.1667	4.2024	13.25	3.51522	13.25	4.39784	13.25	8.83915	14.5833	4.97187	13.25	5.68499	13.8333	3.04043	13.75	8.38489	13.25	2.56026	13.25	8.63036	34.3333	3.16474	13.25	2.12586	13.25	7.44247	13.25	8.08948
13.3333	3.63605	13.3333	9.87541	13.3333	4.64032	17.3333	7.40539	16.75	4.36307	14.5833	5.09227	13.3333	3.35079	14.1667	1.40719	13.3333	1.98195	13.3333	6.11408	13.4167	5.00652	14.25	4.21794	13.3333	3.40135	13.3333	4.43746	13.3333	8.83083	14.6667	5.04751	13.3333	5.68272	13.9167	3.10432	13.8333	8.39994	13.3333	2.66126	13.3333	8.91315	34.4167	3.18445	13.3333	2.15469	13.3333	7.55991	13.3333	8.10069
13.4167	3.67085	13.4167	9.87291	13.4167	4.6862	17.4167	7.42173	16.8333	4.35811	14.6667	5.13965	13.4167	3.38386	14.25	1.34687	13.4167	1.94402	13.4167	5.91496	13.5	5.06386	14.3333	4.25314	13.4167	3.19445	13.4167	4.5311	13.4167	8.83034	14.75	5.11396	13.4167	5.65986	14	3.12255	13.9167	8.39205	13.4167	2.73718	13.4167	8.98962	34.5	3.19924	13.4167	2.16809	13.4167	7.691	13.4167	8.09649
13.5	3.70235	13.5	9.89836	13.5	4.73569	17.5	7.40904	16.9167	4.32351	14.75	5.28113	13.5	3.44354	14.3333	1.27933	13.5	1.95683	13.5	5.69874	13.5833	5.0838	14.4167	4.28092	13.5	3.14737	13.5	4.57007	13.5	8.83811	14.8333	5.13732	13.5	5.61993	14.0833	3.16051	14	8.50605	13.5	2.8377	13.5	8.99419	34.5833	3.17242	13.5	2.15181	13.5	7.74366	13.5	8.08838
13.5833	3.73804	13.5833	10.0027	13.5833	4.77692	17.5833	7.45454	17	4.31182	14.8333	5.36755	13.5833	3.48591	14.4167	1.20856	13.5833	1.94831	13.5833	5.52425	13.6667	5.1382	14.5	4.34721	13.5833	3.12406	13.5833	4.53363	13.5833	8.83365	14.9167	5.19058	13.5833	5.5845	14.1667	3.18775	14.0833	8.571	13.5833	2.91967	13.5833	8.9816	34.6667	3.19754	13.5833	2.16375	13.5833	7.80731	13.5833	8.06097
13.6667	3.80804	13.6667	10.0506	13.6667	4.7968	17.6667	7.47646	17.0833	4.29357	14.9167	5.36407	13.6667	3.56161	14.5	1.20149	13.6667	1.95279	13.6667	5.41186	13.75	5.18146	14.5833	4.42252	13.6667	3.14447	13.6667	4.56358	13.6667	8.83391	15	5.24527	13.6667	5.59312	14.25	3.19462	14.1667	8.64851	13.6667	2.94079	13.6667	8.94027	34.75	3.21327	13.6667	2.1432	13.6667	7.8469	13.6667	8.06766
13.75	3.88864	13.75	10.0401	13.75	4.8301	17.75	7.53288	17.1667	4.31487	15	5.38126	13.75	3.59072	14.5833	1.17925	13.75	1.95812	13.75	5.3716	13.8333	5.22583	14.6667	4.49455	13.75	3.15914	13.75	4.66955	13.75	8.82606	15.0833	5.29127	13.75	5.62362	14.3333	3.16507	14.25	8.63149	13.75	2.94111	13.75	8.83011	34.8333	3.23785	13.75	2.13254	13.75	7.89597	13.75	8.06625
13.8333	3.92473	13.8333	10.1481	13.8333	4.91769	17.8333	7.55753	17.25	4.32028	15.0833	5.3815	13.8333	3.64325	14.6667	1.22111	13.8333	2.01705	13.8333	5.40713	13.9167	5.32157	14.75	4.51776	13.8333	3.22652	13.8333	4.56858	13.8333	8.83033	15.1667	5.31897	13.8333	5.64383	14.4167	3.13312	14.3333	8.38277	13.8333	2.99413	13.8333	8.82916	34.9167	3.208	13.8333	2.13248	13.8333	7.89966	13.8333	8.08885
13.9167	3.95935	13.9167	10.2855	13.9167	4.94807	17.9167	7.57898	17.3333	4.32658	15.1667	5.37847	13.9167	3.70925	14.75	1.26655	13.9167	2.03729	13.9167	5.45019	14	5.39876	14.8333	4.57839	13.9167	3.26832	13.9167	4.40346	13.9167	8.84001	15.25	5.3181	13.9167	5.64078	14.5	3.16606	14.4167	8.13404	13.9167	3.02426	13.9167	8.82821	35	3.20403	13.9167	2.13541	13.9167	7.90517	13.9167	8.14038
14	3.96216	14	10.4721	14	5.0221	18	7.64429	17.4167	4.3635	15.25	5.33507	14	3.75867	14.8333	1.30329	14	2.039	14	5.54274	14.0833	5.49845	14.9167	4.58665	14	3.31809	14	4.33217	14	8.83986	15.3333	5.31362	14	5.61962	14.5833	3.23112	14.5	7.88532	14	3.13509	14	8.83061	35.0833	3.21093	14	2.14324	14	7.89004	14	8.25797
14.0833	4.02512	14.0833	10.4509	14.0833	5.04332	18.0833	7.72051	17.5	4.3781	15.3333	5.28246	14.0833	3.80445	14.9167	1.24936	14.0833	1.98632	14.0833	5.64136	14.1667	5.51492	15	4.57878	14.0833	3.33173	14.0833	4.30871	14.0833	8.84284	15.4167	5.29978	14.0833	5.60672	14.6667	3.29355	14.5833	7.6366	14.0833	3.16757	14.0833	8.86649	35.1667	3.22108	14.0833	2.13528	14.0833	7.83035	14.0833	8.30615
14.1667	4.07948	14.1667	10.4467	14.1667	5.07182	18.1667	7.78317	17.5833	4.39383	15.4167	5.32949	14.1667	3.82972	15	1.23314	14.1667	1.94009	14.1667	5.73034	14.25	5.49848	15.0833	4.57724	14.1667	3.33823	14.1667	4.31703	14.1667	8.85634	15.5	5.30244	14.1667	5.61221	14.75	3.34408	14.6667	7.53152	14.1667	3.24679	14.1667	8.86676	35.25	3.22235	14.1667	2.14383	14.1667	7.73307	14.1667	8.34957
14.25	4.13727	14.25	10.4294	14.25	5.05394	18.25	7.80283	17.6667	4.3477	15.5	5.33842	14.25	3.86243	15.0833	1.2276	14.25	1.92812	14.25	5.76339	14.3333	5.48439	15.1667	4.61801	14.25	3.32508	14.25	4.34997	14.25	8.85639	15.5833	5.30488	14.25	5.61027	14.8333	3.36114	14.75	7.50001	14.25	3.22617	14.25	8.89758	35.3333	3.21236	14.25	2.10148	14.25	7.63682	14.25	8.3265
14.3333	4.1633	14.3333	10.3745	14.3333	5.05366	18.3333	7.80332	17.75	4.37555	15.5833	5.33591	14.3333	3.88325	15.1667	1.3109	14.3333	1.9505	14.3333	5.79508	14.4167	5.4883	15.25	4.72083	14.3333	3.29606	14.3333	4.37062	14.3333	8.83761	15.6667	5.3213	14.3333	5.60042	14.9167	3.36271	14.8333	7.58092	14.3333	3.22755	14.3333	8.92888	35.4167	3.23899	14.3333	2.06621	14.3333	7.65231	14.3333	8.34149
14.4167	4.17107	14.4167	10.3409	14.4167	5.08875	18.4167	7.85441	17.8333	4.37872	15.6667	5.30656	14.4167	3.91715	15.25	1.33617	14.4167	1.98573	14.4167	5.8061	14.5	5.52281	15.3333	4.7686	14.4167	3.29291	14.4167	4.37101	14.4167	8.7989	15.75	5.3062	14.4167	5.54792	15	3.36372	14.9167	7.73732	14.4167	3.17561	14.4167	8.91075	35.5	3.25974	14.4167	2.05674	14.4167	7.72781	14.4167	8.32567
14.5	4.17797	14.5	10.3073	14.5	5.10913	18.5	7.89749	17.9167	4.39329	15.75	5.2985	14.5	3.93483	15.3333	1.43495	14.5	2.00575	14.5	5.78753	14.5833	5.55224	15.4167	4.87414	14.5	3.30396	14.5	4.38211	14.5	8.80005	15.8333	5.35115	14.5	5.53547	15.0833	3.3507	15	8.01202	14.5	3.31394	14.5	8.85316	35.5833	3.28722	14.5	2.06502	14.5	7.843	14.5	8.36426
14.5833	4.17711	14.5833	10.3219	14.5833	5.09821	18.5833	7.96509	18	4.3717	15.8333	5.31892	14.5833	3.96218	15.4167	1.41231	14.5833	1.97669	14.5833	5.79888	14.6667	5.5637	15.5	4.9327	14.5833	3.3097	14.5833	4.35719	14.5833	8.81675	15.9167	5.36238	14.5833	5.53071	15.1667	3.37185	15.0833	8.28672	14.5833	3.14639	14.5833	8.73319	35.6667	3.26837	14.5833	2.05795	14.5833	7.92874	14.5833	8.38818
14.6667	4.24374	14.6667	10.3353	14.6667	5.07665	18.6667	7.98247	18.0833	4.37588	15.9167	5.34001	14.6667	4.02591	15.5	1.42695	14.6667	1.94638	14.6667	5.81897	14.75	5.61193	15.5833	5.04874	14.6667	3.25451	14.6667	4.37824	14.6667	8.83862	16	5.42329	14.6667	5.54405	15.25	3.39518	15.1667	8.44179	14.6667	3.20935	14.6667	8.65336	35.75	3.26046	14.6667	2.06796	14.6667	7.94986	14.6667	8.42862
14.75	4.28494	14.75	10.374	14.75	5.0338	18.75	8.05993	18.1667	4.37066	16	5.3795	14.75	4.08856	15.5833	1.38425	14.75	1.92143	14.75	5.86877	14.8333	5.65234	15.6667	5.09251	14.75	3.18961	14.75	4.31034	14.75	8.83302	16.0833	5.47695	14.75	5.54807	15.3333	3.42816	15.25	8.43932	14.75	3.21294	14.75	8.38905	35.8333	3.22537	14.75	2.08798	14.75	7.9855	14.75	8.45402
14.8333	4.33701	14.8333	10.362	14.8333	5.05597	18.8333	8.0977	18.25	4.35777	16.0833	5.39667	14.8333	4.14452	15.6667	1.417	14.8333	1.92943	14.8333	5.90283	14.9167	5.69367	15.75	5.12985	14.8333	3.16886	14.8333	4.3305	14.8333	8.82253	16.1667	5.59582	14.8333	5.54454	15.4167	3.42521	15.3333	8.52142	14.8333	3.40252	14.8333	8.58047	35.9167	3.23112	14.8333	2.12873	14.8333	8.03828	14.8333	8.51747
14.9167	4.34685	14.9167	10.3384	14.9167	5.0668	18.9167	8.07878	18.3333	4.36934	16.1667	5.43689	14.9167	4.20228	15.75	1.52921	14.9167	1.9489	14.9167	5.96976	15	5.70841	15.8333	5.17938	14.9167	3.16991	14.9167	4.37026	14.9167	8.84903	16.25	5.72869	14.9167	5.53111	15.5	3.43094	15.4167	8.53286	14.9167	3.51664	14.9167	8.77189	36	3.26269	14.9167	2.14235	14.9167	8.13323	14.9167	8.58147
15	4.37092	15	10.2715	15	5.11885	19	8.05573	18.4167	4.35939	16.25	5.49439	15	4.20326	15.8333	1.60992	15	1.96672	15	6.05967	15.0833	5.7324	15.9167	5.27632	15	3.22591	15	4.40883	15	8.86166	16.3333	5.86426	15	5.52472	15.5833	3.43688	15.5	8.57767	15	3.65347	15	8.8203	36.0833	3.2614	15	2.17203	15	8.19945	15	8.64571
15.0833	4.38206	15.0833	10.327	15.0833	5.15798	19.0833	8.11049	18.5	4.34721	16.3333	5.5522	15.0833	4.20179	15.9167	1.69374	15.0833	1.97794	15.0833	6.14946	15.1667	5.80132	16	5.31071	15.0833	3.28147	15.0833	4.47953	15.0833	8.90981	16.4167	5.92226	15.0833	5.51962	15.6667	3.47427	15.5833	8.6147	15.0833	3.80442	15.0833	8.90966	36.1667	3.26016	15.0833	2.16791	15.0833	8.19732	15.0833	8.66486
15.1667	4.40445	15.1667	10.367	15.1667	5.17568	19.1667	8.12767	18.5833	4.32076	16.4167	5.56391	15.1667	4.22759	16	1.7954	15.1667	2.00918	15.1667	6.18077	15.25	5.86955	16.0833	5.32101	15.1667	3.29855	15.1667	4.4554	15.1667	8.913	16.5	5.93336	15.1667	5.54892	15.75	3.49914	15.6667	8.67201	15.1667	3.85651	15.1667	8.97265	36.25	3.2596	15.1667	2.1903	15.1667	8.21207	15.1667	8.65646
15.25	4.4406	15.25	10.4572	15.25	5.17479	19.25	8.17072	18.6667	4.31677	16.5	5.49309	15.25	4.29819	16.0833	1.88728	15.25	2.05113	15.25	6.18949	15.3333	5.98738	16.1667	5.3239	15.25	3.3392	15.25	4.50376	15.25	8.94884	16.5833	5.95135	15.25	5.57783	15.8333	3.51315	15.75	8.70968	15.25	3.87986	15.25	8.99019	36.3333	3.27302	15.25	2.21137	15.25	8.23042	15.25	8.64094
15.3333	4.49575	15.3333	10.4727	15.3333	5.162	19.3333	8.17399	18.75	4.29282	16.5833	5.46427	15.3333	4.41686	16.1667	1.95603	15.3333	2.08914	15.3333	6.21018	15.4167	6.11498	16.25	5.44515	15.3333	3.37189	15.3333	4.45484	15.3333	8.96742	16.6667	5.93363	15.3333	5.60732	15.9167	3.53606	15.8333	8.69073	15.3333	3.89671	15.3333	8.98887	36.4167	3.26575	15.3333	2.25958	15.3333	8.28016	15.3333	8.62621
15.4167	4.55559	15.4167	10.5293	15.4167	5.20081	19.4167	8.25534	18.8333	4.35331	16.6667	5.49458	15.4167	4.48941	16.25	1.95471	15.4167	2.13652	15.4167	6.32254	15.5	6.21242	16.3333	5.56641	15.4167	3.43894	15.4167	4.46479	15.4167	8.97995	16.75	5.93051	15.4167	5.55791	16	3.55336	15.9167	8.74033	15.4167	3.88484	15.4167	8.97257	36.5	3.25375	15.4167	2.27695	15.4167	8.33374	15.4167	8.63447
15.5	4.58975	15.5	10.5264	15.5	5.24664	19.5	8.24008	18.9167	4.31925	16.75	5.5141	15.5	4.55134	16.3333	2.07615	15.5	2.17432	15.5	6.39956	15.5833	6.34175	16.4167	5.55911	15.5	3.46957	15.5	4.43673	15.5	8.97904	16.8333	5.89724	15.5	5.51327	16.0833	3.5856	16	8.83595	15.5	3.83246	15.5	8.99046	36.5833	3.26621	15.5	2.31528	15.5	8.41404	15.5	8.60204
15.5833	4.58837	15.5833	10.64	15.5833	5.31482	19.5833	8.11585	19	4.33652	16.8333	5.55116	15.5833	4.58663	16.4167	2.22893	15.5833	2.18149	15.5833	6.45331	15.6667	6.41131	16.5	5.55087	15.5833	3.46476	15.5833	4.43604	15.5833	8.97261	16.9167	5.73697	15.5833	5.49186	16.1667	3.57765	16.0833	8.98475	15.5833	3.81536	15.5833	9.02468	36.6667	3.26762	15.5833	2.31447	15.5833	8.47109	15.5833	8.63445
15.6667	4.56703	15.6667	10.6888	15.6667	5.35351	19.6667	8.00749	19.0833	4.30704	16.9167	5.53239	15.6667	4.62152	16.5	2.21818	15.6667	2.23027	15.6667	6.44432	15.75	6.42705	16.5833	5.49644	15.6667	3.46696	15.6667	4.46251	15.6667	8.9877	17	5.65283	15.6667	5.50585	16.25	3.58803	16.1667	9.0688	15.6667	3.79482	15.6667	9.05424	36.75	3.25501	15.6667	2.30898	15.6667	8.50333	15.6667	8.64592
15.75	4.57871	15.75	10.8115	15.75	5.39795	19.75	7.9634	19.1667	4.38938	17	5.51882	15.75	4.70413	16.5833	2.12641	15.75	2.23776	15.75	6.44408	15.8333	6.44776	16.6667	5.43239	15.75	3.46237	15.75	4.48113	15.75	9.01195	17.0833	5.57299	15.75	5.52189	16.3333	3.61769	16.25	9.08504	15.75	3.87694	15.75	9.0232	36.8333	3.2476	15.75	2.30524	15.75	8.50435	15.75	8.70849
15.8333	4.62076	15.8333	10.8486	15.8333	5.44804	19.8333	7.92111	19.25	4.4679	17.0833	5.44768	15.8333	4.7692	16.6667	2.0959	15.8333	2.28174	15.8333	6.45343	15.9167	6.51012	16.75	5.41917	15.8333	3.4605	15.8333	4.49445	15.8333	9.02031	17.1667	5.69161	15.8333	5.53855	16.4167	3.68108	16.3333	9.03927	15.8333	3.93031	15.8333	9.00269	36.9167	3.27146	15.8333	2.29125	15.8333	8.52869	15.8333	8.78207
15.9167	4.65211	15.9167	10.9332	15.9167	5.457	19.9167	7.94591	19.3333	4.43201	17.1667	5.38867	15.9167	4.85859	16.75	2.03909	15.9167	2.24762	15.9167	6.46212	16	6.63338	16.8333	5.43973	15.9167	3.48791	15.9167	4.4879	15.9167	9.03506	17.25	5.76271	15.9167	5.56675	16.5	3.73599	16.4167	8.99729	15.9167	4.00661	15.9167	8.97666	37	3.30656	15.9167	2.29387	15.9167	8.59553	15.9167	8.84142
16	4.63516	16	10.9822	16	5.44742	20	7.9419	19.4167	4.41376	17.25	5.38093	16	4.86142	16.8333	2.10777	16	2.2689	16	6.46363	16.0833	6.73479	16.9167	5.47756	16	3.49639	16	4.48165	16	9.03448	17.3333	5.87988	16	5.59592	16.5833	3.72532	16.5	8.9494	16	4.10098	16	8.99392	37.0833	3.3045	16	2.29394	16	8.63986	16	8.92865
16.0833	4.60071	16.0833	11.0542	16.0833	5.38952	20.0833	7.94334	19.5	4.36704	17.3333	5.42672	16.0833	4.88142	16.9167	2.09468	16.0833	2.2588	16.0833	6.45269	16.1667	6.83403	17	5.45657	16.0833	3.55388	16.0833	4.49669	16.0833	9.02888	17.4167	5.91519	16.0833	5.63226	16.6667	3.71994	16.5833	9.05949	16.0833	4.14919	16.0833	8.96685	37.1667	3.31207	16.0833	2.3648	16.0833	8.654	16.0833	8.95995
16.1667	4.58286	16.1667	11.1037	16.1667	5.41191	20.1667	7.92636	19.5833	4.39692	17.4167	5.479	16.1667	4.93334	17	2.21265	16.1667	2.25533	16.1667	6.43839	16.25	6.88847	17.0833	5.36486	16.1667	3.60198	16.1667	4.50787	16.1667	9.00265	17.5	5.94992	16.1667	5.6199	16.75	3.69255	16.6667	9.095	16.1667	4.18015	16.1667	8.97265	37.25	3.29149	16.1667	2.38573	16.1667	8.63762	16.1667	8.99761
16.25	4.59225	16.25	11.1928	16.25	5.46015	20.25	7.98439	19.6667	4.40314	17.5	5.5128	16.25	4.9738	17.0833	2.15902	16.25	2.23788	16.25	6.42363	16.3333	6.93715	17.1667	5.2913	16.25	3.68111	16.25	4.54895	16.25	9.00372	17.5833	5.93721	16.25	5.61047	16.8333	3.7144	16.75	9.19538	16.25	4.16043	16.25	9.01016	37.3333	3.28337	16.25	2.42267	16.25	8.65206	16.25	9.0395
16.3333	4.5878	16.3333	11.2711	16.3333	5.5375	20.3333	7.99695	19.75	4.43836	17.5833	5.48001	16.3333	5.00244	17.1667	2.11111	16.3333	2.2502	16.3333	6.42426	16.4167	6.9965	17.25	5.30369	16.3333	3.76757	16.3333	4.58278	16.3333	9.01069	17.6667	5.93826	16.3333	5.57138	16.9167	3.7075	16.8333	9.15587	16.3333	4.14334	16.3333	9.04813	37.4167	3.26946	16.3333	2.41792	16.3333	8.68642	16.3333	9.06816
16.4167	4.55836	16.4167	11.3138	16.4167	5.55469	20.4167	8.03267	19.8333	4.49352	17.6667	5.50488	16.4167	5.01114	17.25	2.13109	16.4167	2.25759	16.4167	6.4429	16.5	7.05232	17.3333	5.30401	16.4167	3.78378	16.4167	4.54475	16.4167	9.01694	17.75	5.91929	16.4167	5.57139	17	3.72788	16.9167	9.29221	16.4167	4.15908	16.4167	9.03186	37.5	3.26467	16.4167	2.43179	16.4167	8.71523	16.4167	9.13229
16.5	4.56202	16.5	11.4433	16.5	5.57294	20.5	8.05457	19.9167	4.62172	17.75	5.52206	16.5	5.05545	17.3333	2.14431	16.5	2.28902	16.5	6.44356	16.5833	7.092	17.4167	5.36459	16.5	3.7253	16.5	4.50434	16.5	9.01466	17.8333	5.96887	16.5	5.6016	17.0833	3.71258	17	9.35984	16.5	4.12363	16.5	8.98692	37.5833	3.2736	16.5	2.43479	16.5	8.97398	16.5	9.14401
16.5833	4.59528	16.5833	11.4606	16.5833	5.60875	20.5833	8.14004	20	4.75377	17.8333	5.54047	16.5833	5.09572	17.4167	2.16397	16.5833	2.32006	16.5833	6.43417	16.6667	7.12326	17.5	5.41815	16.5833	3.60993	16.5833	4.41886	16.5833	9.02696	17.9167	5.99866	16.5833	5.62095	17.1667	3.74796	17.0833	9.42199	16.5833	4.15279	16.5833	8.99959	37.6667	3.27457	16.5833	2.4656	16.5833	9.23273	16.5833	9.21092
16.6667	4.64493	16.6667	11.5172	16.6667	5.68459	20.6667	8.16874	20.0833	4.81625	17.9167	5.6598	16.6667	5.14458	17.5	2.17899	16.6667	2.33343	16.6667	6.42895	16.75	7.11927	17.5833	5.49295	16.6667	3.55064	16.6667	4.39917	16.6667	9.03051	18	6.06017	16.6667	5.68282	17.25	3.8098	17.1667	9.40971	16.6667	4.11138	16.6667	9.00486	37.75	3.31396	16.6667	2.45757	16.6667	9.49148	16.6667	9.21686
16.75	4.6854	16.75	11.5435	16.75	5.70019	20.75	8.174	20.1667	4.79534	18	5.74467	16.75	5.1624	17.5833	2.20731	16.75	2.32528	16.75	6.42976	16.8333	7.19264	17.6667	5.61151	16.75	3.5586	16.75	4.36877	16.75	9.02548	18.0833	6.08144	16.75	5.6886	17.3333	3.90058	17.25	9.39584	16.75	4.15785	16.75	8.98038	37.8333	3.33815	16.75	2.46635	16.75	9.25028	16.75	9.25671
16.8333	4.71479	16.8333	11.5647	16.8333	5.71557	20.8333	8.23343	20.25	4.70518	18.0833	6.05793	16.8333	5.13019	17.6667	2.17009	16.8333	2.27151	16.8333	6.43739	16.9167	7.21083	17.75	5.63864	16.8333	3.60564	16.8333	4.36662	16.8333	9.0147	18.1667	6.12398	16.8333	5.69744	17.4167	3.94095	17.3333	9.41084	16.8333	4.16184	16.8333	8.91027	37.9167	3.35329	16.8333	2.44407	16.8333	9.00908	16.8333	9.24645
16.9167	4.68037	16.9167	11.5524	16.9167	5.70311	20.9167	8.33919	20.3333	4.68797	18.1667	6.01969	16.9167	5.10158	17.75	2.15872	16.9167	2.24667	16.9167	6.43872	17	7.36553	17.8333	5.69179	16.9167	3.58714	16.9167	4.39281	16.9167	9.01039	18.25	6.16602	16.9167	5.72324	17.5	3.92268	17.4167	9.46392	16.9167	4.20044	16.9167	8.8898	38	3.36734	16.9167	2.48305	16.9167	8.76788	16.9167	9.24838
17	4.62103	17	11.5081	17	5.7217	21	8.52464	20.4167	4.63847	18.25	6.05563	17	5.04957	17.8333	2.15115	17	2.23949	17	6.44126	17.0833	7.52023	17.9167	5.77955	17	3.58067	17	4.4049	17	9.03225	18.3333	6.16493	17	5.7246	17.5833	3.98033	17.5	9.4996	17	4.2068	17	8.97613	38.0833	3.38537	17	2.4846	17	8.74118	17	9.27854
17.0833	4.59296	17.0833	11.5207	17.0833	5.70671	21.0833	8.58788	20.5	4.64422	18.3333	5.99723	17.0833	5.06083	17.9167	2.20056	17.0833	2.2395	17.0833	6.42561	17.1667	7.67493	18	5.88785	17.0833	3.51851	17.0833	4.43395	17.0833	9.05285	18.4167	6.15166	17.0833	5.75077	17.6667	4.00537	17.5833	9.4957	17.0833	4.24149	17.0833	9.01004	38.1667	3.39979	17.0833	2.5167	17.0833	8.7815	17.0833	9.28802
17.1667	4.56154	17.1667	11.564	17.1667	5.70733	21.1667	8.56682	20.5833	4.63354	18.4167	6.07071	17.1667	5.07015	18	2.25257	17.1667	2.23533	17.1667	6.41048	17.25	7.72508	18.0833	5.89153	17.1667	3.49337	17.1667	4.44969	17.1667	9.06836	18.5	6.2002	17.1667	5.72457	17.75	3.97282	17.6667	9.48902	17.1667	4.25207	17.1667	9.05138	38.25	3.35876	17.1667	2.52568	17.1667	8.76607	17.1667	9.30107
17.25	4.57325	17.25	11.6545	17.25	5.70685	21.25	8.53509	20.6667	4.66869	18.5	6.06581	17.25	5.1415	18.0833	2.27812	17.25	2.22549	17.25	6.40672	17.3333	7.7991	18.1667	5.87157	17.25	3.50466	17.25	4.42909	17.25	9.0751	18.5833	6.22416	17.25	5.7167	17.8333	3.87204	17.75	9.48183	17.25	4.23799	17.25	9.02955	38.3333	3.35732	17.25	2.5387	17.25	8.78055	17.25	9.59472
17.3333	4.57592	17.3333	11.6938	17.3333	5.70586	21.3333	8.57085	20.75	4.73515	18.5833	6.08114	17.3333	5.18685	18.1667	2.28543	17.3333	2.24122	17.3333	6.41978	17.4167	7.76857	18.25	5.83776	17.3333	3.55203	17.3333	4.4328	17.3333	9.08293	18.6667	6.27326	17.3333	5.73579	17.9167	3.77503	17.8333	9.49483	17.3333	4.26155	17.3333	9.06139	38.4167	3.35713	17.3333	2.53952	17.3333	8.76476	17.3333	9.88837
17.4167	4.58748	17.4167	11.7167	17.4167	5.69292	21.4167	8.63683	20.8333	4.71771	18.6667	6.16313	17.4167	5.22196	18.25	2.33419	17.4167	2.25381	17.4167	6.42563	17.5	7.80142	18.3333	5.89679	17.4167	3.58567	17.4167	4.39664	17.4167	9.07974	18.75	6.21581	17.4167	5.78418	18	3.79088	17.9167	9.49444	17.4167	4.26263	17.4167	9.04259	38.5	3.35704	17.4167	2.5236	17.4167	8.79484	17.4167	10.182
17.5	4.59076	17.5	11.5909	17.5	5.72326	21.5	8.76027	20.9167	4.73069	18.75	6.1135	17.5	5.26234	18.3333	2.35855	17.5	2.2756	17.5	6.43562	17.5833	7.78175	18.4167	5.93311	17.5	3.5952	17.5	4.39302	17.5	9.07825	18.8333	6.193	17.5	5.82649	18.0833	3.80132	18	9.55139	17.5	4.31006	17.5	9.07075	38.5833	3.35353	17.5	2.51819	17.5	8.81451	17.5	10.4757
17.5833	4.56928	17.5833	11.5608	17.5833	5.7379	21.5833	8.84333	21	4.69672	18.8333	5.94808	17.5833	5.30729	18.4167	2.43591	17.5833	2.24382	17.5833	6.41908	17.6667	7.78343	18.5	5.99896	17.5833	3.57556	17.5833	4.35797	17.5833	9.0673	18.9167	6.12171	17.5833	5.84484	18.1667	3.80122	18.0833	9.57734	17.5833	4.29509	17.5833	9.01258	38.6667	3.37974	17.5833	2.5024	17.5833	8.87158	17.5833	10.7693
17.6667	4.65268	17.6667	11.5847	17.6667	5.75412	21.6667	8.94669	21.0833	4.80841	18.9167	5.87753	17.6667	5.38491	18.5	2.40386	17.6667	2.27269	17.6667	6.43671	17.75	7.78771	18.5833	6.06177	17.6667	3.60853	17.6667	4.3574	17.6667	9.07192	19	6.14646	17.6667	5.85453	18.25	3.81561	18.1667	9.6292	17.6667	4.29699	17.6667	8.9664	38.75	3.40656	17.6667	2.50555	17.6667	8.89528	17.6667	10.9187
17.75	4.6988	17.75	11.6819	17.75	5.74828	21.75	8.92171	21.1667	4.87734	19	5.95676	17.75	5.43597	18.5833	2.58932	17.75	2.2906	17.75	6.42823	17.8333	7.77581	18.6667	6.10119	17.75	3.64099	17.75	4.35334	17.75	9.05713	19.0833	6.22788	17.75	5.8675	18.3333	3.83064	18.25	9.63472	17.75	4.31625	17.75	8.97617	38.8333	3.44359	17.75	2.49576	17.75	8.91612	17.75	10.9318
17.8333	4.74543	17.8333	11.7052	17.8333	5.76825	21.8333	9.00456	21.25	4.9564	19.0833	5.9521	17.8333	5.50085	18.6667	2.66799	17.8333	2.31323	17.8333	6.44239	17.9167	7.7975	18.75	6.09496	17.8333	3.67714	17.8333	4.29236	17.8333	9.05311	19.1667	6.27911	17.8333	5.88147	18.4167	3.84205	18.3333	9.69914	17.8333	4.34351	17.8333	8.97969	38.9167	3.48093	17.8333	2.49763	17.8333	8.92556	17.8333	10.9473
17.9167	4.68827	17.9167	11.8032	17.9167	5.77053	21.9167	8.93617	21.3333	4.97703	19.1667	6.00597	17.9167	5.54068	18.75	2.7295	17.9167	2.29467	17.9167	6.42246	18	7.7842	18.8333	6.14326	17.9167	3.67978	17.9167	4.29488	17.9167	9.04249	19.25	6.30163	17.9167	5.88107	18.5	3.84027	18.4167	9.72347	17.9167	4.52177	17.9167	9.04519	39	3.50518	17.9167	2.50228	17.9167	8.95229	17.9167	10.9834
18	4.72541	18	11.9554	18	5.75926	22	9.09191	21.4167	4.98163	19.25	5.91966	18	5.56479	18.8333	2.65754	18	2.28531	18	6.45565	18.0833	7.89619	18.9167	6.16808	18	3.69093	18	4.29109	18	9.05085	19.3333	6.29764	18	5.9304	18.5833	3.82007	18.5	9.75067	18	4.66857	18	9.0802	39.0833	3.49289	18	2.51134	18	8.97562	18	10.9785
18.0833	4.81565	18.0833	12.0521	18.0833	5.73672	22.0833	9.15977	21.5	4.97781	19.3333	6.09468	18.0833	5.61104	18.9167	2.70197	18.0833	2.30502	18.0833	6.4549	18.1667	7.93112	19	6.27506	18.0833	3.72867	18.0833	4.34462	18.0833	9.06937	19.4167	6.31454	18.0833	5.93006	18.6667	3.85752	18.5833	9.73202	18.0833	4.74633	18.0833	9.14176	39.1667	3.44997	18.0833	2.5188	18.0833	9.01442	18.0833	10.9573
18.1667	4.8583	18.1667	12.0581	18.1667	5.74695	22.1667	9.23362	21.5833	4.98025	19.4167	6.03062	18.1667	5.63738	19	2.70785	18.1667	2.36036	18.1667	6.48989	18.25	8.0013	19.0833	6.29898	18.1667	3.76178	18.1667	4.29939	18.1667	9.07938	19.5	6.33938	18.1667	5.96991	18.75	3.87493	18.6667	9.73081	18.1667	4.93359	18.1667	9.17559	39.25	3.41948	18.1667	2.53282	18.1667	9.02644	18.1667	10.9795
18.25	4.8253	18.25	12.0783	18.25	5.8008	22.25	9.14408	21.6667	5.01059	19.5	6.23198	18.25	5.69541	19.0833	2.76459	18.25	2.37991	18.25	6.48072	18.3333	7.97389	19.1667	6.36893	18.25	3.79344	18.25	4.31851	18.25	9.10109	19.5833	6.34816	18.25	5.97662	18.8333	3.91306	18.75	9.73999	18.25	4.89588	18.25	9.20726	39.3333	3.40979	18.25	2.57102	18.25	9.03689	18.25	11.0347
18.3333	4.74729	18.3333	12.1143	18.3333	5.86693	22.3333	9.09633	21.75	5.0023	19.5833	6.18973	18.3333	5.74159	19.1667	2.75031	18.3333	2.42163	18.3333	6.48528	18.4167	7.97618	19.25	6.39693	18.3333	3.77982	18.3333	4.31034	18.3333	9.10541	19.6667	6.38215	18.3333	6.00698	18.9167	3.90915	18.8333	9.76407	18.3333	4.95758	18.3333	9.22404	39.4167	3.40068	18.3333	2.57141	18.3333	9.02019	18.3333	11.0689
18.4167	4.81977	18.4167	12.2662	18.4167	5.90796	22.4167	8.99486	21.8333	4.95798	19.6667	6.19073	18.4167	5.82371	19.25	2.79287	18.4167	2.40462	18.4167	6.46172	18.5	7.9088	19.3333	6.46373	18.4167	3.75522	18.4167	4.34205	18.4167	9.1091	19.75	6.37234	18.4167	5.99625	19	3.92229	18.9167	9.80646	18.4167	4.99579	18.4167	9.20178	39.5	3.44064	18.4167	2.57687	18.4167	9.037	18.4167	11.1027
18.5	4.8037	18.5	12.3635	18.5	5.94666	22.5	8.98607	21.9167	4.90604	19.75	6.16851	18.5	5.90066	19.3333	2.79864	18.5	2.40567	18.5	6.44459	18.5833	7.90883	19.4167	6.53538	18.5	3.75692	18.5	4.33722	18.5	9.08303	19.8333	6.45487	18.5	6.00762	19.0833	3.90924	19	9.83231	18.5	5.0235	18.5	9.15198	39.5833	3.45354	18.5	2.55503	18.5	9.02923	18.5	11.1358
18.5833	4.78275	18.5833	12.3437	18.5833	5.98425	22.5833	9.06497	22	4.8985	19.8333	6.21066	18.5833	5.95615	19.4167	2.82021	18.5833	2.37611	18.5833	6.43841	18.6667	7.91233	19.5	6.60257	18.5833	3.77421	18.5833	4.34125	18.5833	9.07809	19.9167	6.48359	18.5833	6.0453	19.1667	3.90711	19.0833	9.82798	18.5833	5.03622	18.5833	9.057	39.6667	3.47295	18.5833	2.55502	18.5833	9.0585	18.5833	11.2215
18.6667	4.7383	18.6667	12.3705	18.6667	6.00773	22.6667	9.17105	22.0833	4.96264	19.9167	6.15049	18.6667	5.96633	19.5	2.83932	18.6667	2.35277	18.6667	6.42658	18.75	7.97492	19.5833	6.68435	18.6667	3.79481	18.6667	4.3383	18.6667	9.08997	20	6.52655	18.6667	6.22009	19.25	3.88121	19.1667	9.83828	18.6667	5.03073	18.6667	8.93442	39.75	3.46204	18.6667	2.53534	18.6667	9.11031	18.6667	11.3038
18.75	4.67853	18.75	12.485	18.75	6.00659	22.75	9.19468	22.1667	5.01963	20	6.16013	18.75	5.96494	19.5833	2.875	18.75	2.32432	18.75	6.42986	18.8333	8.00013	19.6667	6.77924	18.75	3.79087	18.75	4.36174	18.75	9.10759	20.0833	6.49365	18.75	6.31567	19.3333	3.86144	19.25	9.86751	18.75	5.0989	18.75	8.87477	39.8333	3.45302	18.75	2.54928	18.75	9.17165	18.75	11.3271
18.8333	4.67338	18.8333	12.6136	18.8333	5.92048	22.8333	9.2358	22.25	5.12858	20.0833	6.15885	18.8333	5.97459	19.6667	2.85804	18.8333	2.39639	18.8333	6.43147	18.9167	8.00284	19.75	6.89204	18.8333	3.85124	18.8333	4.39026	18.8333	9.09599	20.1667	6.50066	18.8333	6.40357	19.4167	3.86552	19.3333	9.89658	18.8333	5.10074	18.8333	9.01347	39.9167	3.45358	18.8333	2.55797	18.8333	9.2115	18.8333	11.3091
18.9167	4.61846	18.9167	12.6987	18.9167	5.80628	22.9167	9.17245	22.3333	5.18294	20.1667	6.41369	18.9167	6.06044	19.75	2.84881	18.9167	2.42799	18.9167	6.42925	19	8.046	19.8333	6.93724	18.9167	3.89527	18.9167	4.39414	18.9167	9.08084	20.25	6.52651	18.9167	6.32801	19.5	3.91678	19.4167	9.87656	18.9167	5.13959	18.9167	9.11083	40	3.47498	18.9167	2.59185	18.9167	9.20366	18.9167	11.2894
19	4.65971	19	12.8017	19	5.73745	23	9.17842	22.4167	5.16132	20.25	6.66852	19	6.14438	19.8333	2.83417	19	2.47757	19	6.43305	19.0833	8.11341	19.9167	7.00793	19	3.93995	19	4.39806	19	9.06504	20.3333	6.5562	19	6.61618	19.5833	3.95384	19.5	9.85672	19	5.18655	19	9.17878	40.0833	3.46889	19	2.58596	19	9.21129	19	11.3258
19.0833	4.66185	19.0833	12.8385	19.0833	5.74795	23.0833	9.21884	22.5	5.14022	20.3333	6.65249	19.0833	6.21242	19.9167	2.83639	19.0833	2.44155	19.0833	6.42355	19.1667	8.24565	20	7.11822	19.0833	3.85753	19.0833	4.36117	19.0833	9.07047	20.4167	6.6188	19.0833	6.74667	19.6667	3.93995	19.5833	9.80846	19.0833	5.23619	19.0833	9.18928	40.1667	3.49352	19.0833	2.59608	19.0833	9.25476	19.0833	11.3588
19.1667	4.73951	19.1667	12.8774	19.1667	5.77026	23.1667	9.3174	22.5833	5.10785	20.4167	6.63646	19.1667	6.21676	20	2.85764	19.1667	2.51915	19.1667	6.4252	19.25	8.32158	20.0833	7.13456	19.1667	3.80635	19.1667	4.33577	19.1667	9.08138	20.5	6.64293	19.1667	6.89915	19.75	3.91172	19.6667	9.81027	19.1667	5.24906	19.1667	9.15223	40.25	3.49501	19.1667	2.57109	19.1667	9.33062	19.1667	11.3712
19.25	4.7695	19.25	12.7454	19.25	5.79966	23.25	9.3964	22.6667	5.09254	20.5	6.68517	19.25	6.2263	20.0833	2.85663	19.25	2.62809	19.25	6.41662	19.3333	8.40116	20.1667	7.17143	19.25	3.74443	19.25	4.31437	19.25	9.09579	20.5833	6.8721	19.25	6.96778	19.8333	3.98191	19.75	9.81714	19.25	5.22115	19.25	9.10265	40.3333	3.50269	19.25	2.56117	19.25	9.38642	19.25	11.3815
19.3333	4.81939	19.3333	12.5759	19.3333	5.84963	23.3333	9.42564	22.75	5.04366	20.5833	6.65293	19.3333	6.24437	20.1667	2.90726	19.3333	2.63324	19.3333	6.40801	19.4167	8.48246	20.25	7.21309	19.3333	3.72845	19.3333	4.30732	19.3333	9.11219	20.6667	7.02127	19.3333	7.12074	19.9167	4.03161	19.8333	9.85683	19.3333	5.15233	19.3333	9.10132	40.4167	3.50952	19.3333	2.55162	19.3333	9.42944	19.3333	11.3824
19.4167	4.78092	19.4167	12.5041	19.4167	5.91241	23.4167	9.44498	22.8333	5.05789	20.6667	6.46009	19.4167	6.29435	20.25	2.89776	19.4167	2.57626	19.4167	6.41618	19.5	8.49254	20.3333	7.27863	19.4167	3.72922	19.4167	4.2775	19.4167	9.11334	20.75	7.10828	19.4167	7.23191	20	4.01878	19.9167	9.89113	19.4167	5.05836	19.4167	9.11297	40.5	3.47654	19.4167	2.57736	19.4167	9.52172	19.4167	11.3992
19.5	4.79498	19.5	12.658	19.5	5.95926	23.5	9.37475	22.9167	5.07948	20.75	6.26725	19.5	6.3517	20.3333	2.90642	19.5	2.52495	19.5	6.41321	19.5833	8.46914	20.4167	7.35571	19.5	3.72135	19.5	4.27573	19.5	9.12348	20.8333	7.15772	19.5	7.27923	20.0833	3.97418	20	9.90227	19.5	5.00167	19.5	9.15424	40.5833	3.47235	19.5	2.61577	19.5	9.56363	19.5	11.3973
19.5833	4.83394	19.5833	12.7425	19.5833	6.01693	23.5833	9.37814	23	5.0898	20.8333	6.25111	19.5833	6.42805	20.4167	2.89613	19.5833	2.51343	19.5833	6.4237	19.6667	8.47645	20.5	7.47164	19.5833	3.75095	19.5833	4.32967	19.5833	9.11231	20.9167	7.16472	19.5833	7.29881	20.1667	3.97166	20.0833	9.92717	19.5833	5.02082	19.5833	9.15638	40.6667	3.46354	19.5833	2.64392	19.5833	9.64033	19.5833	11.3834
19.6667	4.91858	19.6667	12.8081	19.6667	6.05999	23.6667	9.34492	23.0833	5.0963	20.9167	6.48338	19.6667	6.43948	20.5	2.8973	19.6667	2.45285	19.6667	6.40626	19.75	8.51955	20.5833	7.58443	19.6667	3.76397	19.6667	4.36214	19.6667	9.12222	21	7.19873	19.6667	7.27966	20.25	4.00764	20.1667	9.90303	19.6667	5.01541	19.6667	9.17442	40.75	3.49397	19.6667	2.68028	19.6667	9.77688	19.6667	11.3811
19.75	4.9489	19.75	12.8677	19.75	6.08224	23.75	9.39215	23.1667	5.12298	21	6.71564	19.75	6.44865	20.5833	2.90449	19.75	2.39694	19.75	6.41678	19.8333	8.56464	20.6667	7.64984	19.75	3.77766	19.75	4.33888	19.75	9.12667	21.0833	7.20808	19.75	7.30961	20.3333	4.03966	20.25	9.9266	19.75	5.13709	19.75	9.16241	40.8333	3.5104	19.75	2.71078	19.75	9.85979	19.75	11.3888
19.8333	4.95823	19.8333	12.9095	19.8333	6.09567	23.8333	9.40231	23.25	5.13027	21.0833	6.7065	19.8333	6.43241	20.6667	2.91687	19.8333	2.38634	19.8333	6.42601	19.9167	8.60466	20.75	7.75539	19.8333	3.77304	19.8333	4.29651	19.8333	9.139	21.1667	7.23832	19.8333	7.24089	20.4167	4.05401	20.3333	9.95305	19.8333	5.13949	19.8333	9.16495	40.9167	3.48339	19.8333	2.71215	19.8333	9.89395	19.8333	11.4046
19.9167	4.98457	19.9167	12.9611	19.9167	6.11625	23.9167	9.41048	23.3333	5.12616	21.1667	6.65537	19.9167	6.48834	20.75	2.96767	19.9167	2.39247	19.9167	6.4388	20	8.60396	20.8333	7.76955	19.9167	3.73708	19.9167	4.26537	19.9167	9.12352	21.25	7.22209	19.9167	7.25344	20.5	4.06753	20.4167	10.0065	19.9167	5.15995	19.9167	9.16747	41	3.47563	19.9167	2.72296	19.9167	9.8165	19.9167	11.4048
20	4.97987	20	13.0183	20	6.16812	24	9.3949	23.4167	5.1344	21.25	6.65762	20	6.47191	20.8333	3.01964	20	2.42398	20	6.44333	20.0833	8.59666	20.9167	7.87158	20	3.76642	20	4.29915	20	9.10192	21.3333	7.20806	20	7.21162	20.5833	4.08326	20.5	10.0357	20	5.12087	20	9.19412	41.0833	3.46412	20	2.73315	20	9.77255	20	11.4293
20.0833	4.99404	20.0833	13.0935	20.0833	6.21114	24.0833	9.37929	23.5	5.1433	21.3333	6.62702	20.0833	6.49025	20.9167	3.06344	20.0833	2.46022	20.0833	6.43677	20.1667	8.60156			20.0833	3.79399	20.0833	4.28895	20.0833	9.07951	21.4167	7.28715	20.0833	7.36026	20.6667	4.12786	20.5833	10.0485	20.0833	5.12406	20.0833	9.1938	41.1667	3.49459	20.0833	2.71596	20.0833	9.67371	20.0833	11.4548
20.1667	4.9484	20.1667	13.1778	20.1667	6.25731	24.1667	9.40351	23.5833	5.17153	21.4167	6.61963	20.1667	6.46134	21	3.07882	20.1667	2.49925	20.1667	6.43652	20.25	8.61856			20.1667	3.83022	20.1667	4.33955	20.1667	9.07661	21.5	7.3711	20.1667	7.34151	20.75	4.16904	20.6667	10.0298	20.1667	5.08824	20.1667	9.20897	41.25	3.48494	20.1667	2.70197	20.1667	9.69432	20.1667	11.4715
20.25	4.94811	20.25	13.2973	20.25	6.29353	24.25	9.47274	23.6667	5.16982			20.25	6.4556	21.0833	3.07398	20.25	2.5404	20.25	6.41915	20.3333	8.63204			20.25	3.78192	20.25	4.35191	20.25	9.07331	21.5833	7.43694	20.25	7.30426	20.8333	4.20405	20.75	9.97893	20.25	5.1053	20.25	9.17205	41.3333	3.48968	20.25	2.70354	20.25	9.62452	20.25	11.4952
20.3333	4.89364	20.3333	13.3481	20.3333	6.3303	24.3333	9.48519	23.75	5.15474			20.3333	6.46586	21.1667	3.15057	20.3333	2.55868	20.3333	6.4009	20.4167	8.65775			20.3333	3.75198	20.3333	4.40105	20.3333	9.08344	21.6667	7.43553	20.3333	7.2395	20.9167	4.19503	20.8333	9.98348	20.3333	5.08371	20.3333	9.1694	41.4167	3.48882	20.3333	2.73213	20.3333	9.72599	20.3333	11.486
20.4167	4.87898	20.4167	13.5029	20.4167	6.34218	24.4167	9.48429	23.8333	5.17271			20.4167	6.48116	21.25	3.22654	20.4167	2.59719	20.4167	6.40279	20.5	8.70509			20.4167	3.75751	20.4167	4.38849	20.4167	9.08849	21.75	7.41156	20.4167	7.28877	21	4.1566	20.9167	10.032	20.4167	5.06557	20.4167	9.18141	41.5	3.50582	20.4167	2.74064	20.4167	9.84555	20.4167	11.4885
20.5	4.9049	20.5	13.5732	20.5	6.28879	24.5	9.42754	23.9167	5.16841			20.5	6.53909	21.3333	3.30034	20.5	2.63186	20.5	6.40399	20.5833	8.72055			20.5	3.79414	20.5	4.38203	20.5	9.09502	21.8333	7.50737	20.5	7.3858	21.0833	4.13158	21	10.0794	20.5	5.04249	20.5	9.21191	41.5833	3.49034	20.5	2.72811	20.5	9.9365	20.5	11.4682
20.5833	4.93267	20.5833	13.5557	20.5833	6.20564	24.5833	9.35861	24	5.20248			20.5833	6.54929	21.4167	3.30404	20.5833	2.66412	20.5833	6.41075	20.6667	8.71174			20.5833	3.79322	20.5833	4.39423	20.5833	9.09145	21.9167	7.54515	20.5833	7.42651	21.1667	4.09055	21.0833	10.0385	20.5833	5.01942	20.5833	9.21575	41.6667	3.4993	20.5833	2.7357	20.5833	9.97112	20.5833	11.5044
20.6667	4.94419	20.6667	13.5694	20.6667	6.09506	24.6667	9.31749	24.0833	5.20233			20.6667	6.62771	21.5	3.32896	20.6667	2.67477	20.6667	6.41464	20.75	8.70917			20.6667	3.76584	20.6667	4.39931	20.6667	9.08617	22	7.60065	20.6667	7.49091	21.25	4.10345	21.1667	10.0243	20.6667	5.1213	20.6667	9.20485	41.75	3.50714	20.6667	2.73578	20.6667	9.94756	20.6667	11.5218
20.75	4.90706	20.75	13.669	20.75	6.05817	24.75	9.33731	24.1667	5.23434			20.75	6.64466	21.5833	3.37209	20.75	2.66961	20.75	6.41826	20.8333	8.73533			20.75	3.75714	20.75	4.38804	20.75	9.08419	22.0833	7.60837	20.75	7.38584	21.3333	4.0858	21.25	10.0206	20.75	4.97516	20.75	9.22771	41.8333	3.51375	20.75	2.7472	20.75	9.94258	20.75	11.5253
20.8333	4.88989	20.8333	13.7992	20.8333	6.06316	24.8333	9.37138	24.25	5.2335			20.8333	6.64342	21.6667	3.41458	20.8333	2.66771	20.8333	6.43653	20.9167	8.77873			20.8333	3.75381	20.8333	4.28878	20.8333	9.09468	22.1667	7.64643	20.8333	7.36864	21.4167	4.09144	21.3333	10.074	20.8333	4.88566	20.8333	9.2559	41.9167	3.49784	20.8333	2.78665	20.8333	9.95127	20.8333	11.523
20.9167	4.87298	20.9167	13.7155	20.9167	6.05239	24.9167	9.36428	24.3333	5.21			20.9167	6.64849	21.75	3.44872	20.9167	2.65772	20.9167	6.44145	21	8.80707			20.9167	3.73805	20.9167	4.3043	20.9167	9.1242	22.25	7.64304	20.9167	7.30517	21.5	4.07492	21.4167	10.0679	20.9167	4.82837	20.9167	9.29998	42	3.48182	20.9167	2.82836	20.9167	9.94041	20.9167	11.5381
21	4.86548	21	13.7126	21	6.05831	25	9.35371	24.4167	5.1842			21	6.65471	21.8333	3.4032	21	2.66499	21	6.44905	21.0833	8.84487			21	3.70207	21	4.33852	21	9.1454	22.3333	7.61704	21	7.31575	21.5833	4.05661	21.5	10.0559	21	5.11368	21	9.37187	42.0833	3.50937	21	2.87118	21	9.85234	21	11.5555
21.0833	4.81911	21.0833	13.7009	21.0833	6.0788	25.0833	9.37688	24.5	5.20094			21.0833	6.66361	21.9167	3.40651	21.0833	2.68423	21.0833	6.4375	21.1667	8.87792			21.0833	3.69274	21.0833	4.32795	21.0833	9.14405	22.4167	7.61342	21.0833	7.31681	21.6667	4.0932	21.5833	10.0103	21.0833	5.34359	21.0833	9.40484	42.1667	3.50572	21.0833	2.88706	21.0833	9.71619	21.0833	11.5806
21.1667	4.82359	21.1667	13.7169	21.1667	6.11661	25.1667	9.41767	24.5833	5.22538			21.1667	6.66355	22	3.44044	21.1667	2.67828	21.1667	6.42235	21.25	8.89142			21.1667	3.71978	21.1667	4.30882	21.1667	9.16172	22.5	7.62516	21.1667	7.39913	21.75	4.1113	21.6667	10.02	21.1667	5.30069	21.1667	9.41674	42.25	3.50032	21.1667	2.91795	21.1667	9.68933	21.1667	11.6196
21.25	4.82398	21.25	13.7169	21.25	6.14059	25.25	9.45383	24.6667	5.26379			21.25	6.68173	22.0833	3.52772	21.25	2.68645	21.25	6.41282	21.3333	8.85782			21.25	3.7207	21.25	4.28206	21.25	9.14721	22.5833	7.64582	21.25	7.63541	21.8333	4.15432	21.75	10.0545	21.25	5.10454	21.25	9.41425	42.3333	3.45503	21.25	2.94044	21.25	9.76284	21.25	11.583
21.3333	4.80473	21.3333	13.7724	21.3333	6.18138	25.3333	9.4499	24.75	5.25726			21.3333	6.7624	22.1667	3.61287	21.3333	2.70905	21.3333	6.40838	21.4167	8.82045			21.3333	3.74451	21.3333	4.30128	21.3333	9.13462	22.6667	7.64342	21.3333	7.70903	21.9167	4.19559	21.8333	10.0631	21.3333	5.12371	21.3333	9.439	42.4167	3.46222	21.3333	2.96466	21.3333	9.78034	21.3333	11.5366
21.4167	4.77053	21.4167	13.8567	21.4167	6.23484	25.4167	9.43564	24.8333	5.23619			21.4167	6.78189	22.25	3.68788	21.4167	2.83376	21.4167	6.4067	21.5	8.86133			21.4167	3.73481	21.4167	4.38208	21.4167	9.10684	22.75	7.64043	21.4167	7.78236	22	4.21238	21.9167	10.0788	21.4167	5.14289	21.4167	9.4233	42.5	3.44953	21.4167	2.97264	21.4167	9.85024	21.4167	11.535
21.5	4.69117	21.5	13.9175	21.5	6.34718	25.5	9.43763	24.9167	5.23643			21.5	6.8282	22.3333	3.74733	21.5	2.9028	21.5	6.4053	21.5833	8.90357			21.5	3.7742	21.5	4.4336	21.5	9.13671	22.8333	7.6417	21.5	7.89996	22.0833	4.22499	22	10.0823	21.5	5.37435	21.5	9.40395	42.5833	3.45719	21.5	2.99366	21.5	9.84028	21.5	11.549
21.5833	4.75391	21.5833	14.0041	21.5833	6.43515	25.5833	9.45752	25	5.21187			21.5833	6.84403	22.4167	3.7267	21.5833	2.94906	21.5833	6.40399	21.6667	8.93954			21.5833	3.77682	21.5833	4.38093	21.5833	9.18617	22.9167	7.6331	21.5833	8.09042	22.1667	4.15014	22.0833	10.1029	21.5833	5.60582	21.5833	9.40252	42.6667	3.46376	21.5833	3.01439	21.5833	9.88209	21.5833	11.5512
21.6667	4.77131	21.6667	14.0469	21.6667	6.48169	25.6667	9.47475	25.0833	5.21055			21.6667	6.89399	22.5	3.76305	21.6667	2.87524	21.6667	6.41383	21.75	8.92629			21.6667	3.80501	21.6667	4.31077	21.6667	9.18484	23	7.64496	21.6667	8.20447	22.25	4.13068	22.1667	10.1196	21.6667	5.83729	21.6667	9.42413	42.75	3.4523	21.6667	3.03013	21.6667	9.89393	21.6667	11.5884
21.75	4.81628	21.75	14.117	21.75	6.49724	25.75	9.43727	25.1667	5.16233			21.75	6.92504	22.5833	3.77569	21.75	2.86033	21.75	6.42824	21.8333	8.91638			21.75	3.80155	21.75	4.26154	21.75	9.21453	23.0833	7.63354	21.75	8.30931	22.3333	4.09147	22.25	10.1342	21.75	5.83819	21.75	9.43078	42.8333	3.4321	21.75	3.00331	21.75	10.0027	21.75	11.6648
21.8333	4.74017	21.8333	14.1528	21.8333	6.52853	25.8333	9.47999	25.25	5.17965			21.8333	6.94367	22.6667	3.84074	21.8333	2.83141	21.8333	6.45041	21.9167	8.90632			21.8333	3.80965	21.8333	4.23407	21.8333	9.19427	23.1667	7.63876	21.8333	8.36036	22.4167	4.09877	22.3333	10.2212	21.8333	5.83636	21.8333	9.44307	42.9167	3.4043	21.8333	2.99754	21.8333	10.0668	21.8333	11.7448
21.9167	4.74987	21.9167	14.1788	21.9167	6.56486	25.9167	9.47833	25.3333	5.2096			21.9167	6.98884	22.75	3.84366	21.9167	2.86716	21.9167	6.44461	22	8.91632			21.9167	3.7903	21.9167	4.24075	21.9167	9.24116	23.25	7.65181	21.9167	8.39202	22.5	4.10928	22.4167	10.2696	21.9167	5.84113	21.9167	9.46824	43	3.44265	21.9167	3.00446	21.9167	10.1309	21.9167	11.7854
22	4.76871	22	14.1961	22	6.60643	26	9.53708	25.4167	5.27465			22	6.97452	22.8333	3.84305	22	2.82921	22	6.42895	22.0833	8.95557			22	3.81165	22	4.25192	22	9.23112	23.3333	7.67434	22	8.42243	22.5833	4.1433	22.5	10.2909	22	5.92882	22	9.52204	43.0833	3.47127	22	3.02225	22	10.1606	22	11.7645
22.0833	4.77051	22.0833	14.2474	22.0833	6.64938	26.0833	9.54314	25.5	5.29969			22.0833	6.97665	22.9167	3.84127	22.0833	2.80977	22.0833	6.39776	22.1667	8.95725			22.0833	3.81278	22.0833	4.28479	22.0833	9.24715	23.4167	7.67865	22.0833	8.42989	22.6667	4.1742	22.5833	10.263	22.0833	5.90109	22.0833	9.54983	43.1667	3.50204	22.0833	3.0191	22.0833	10.0357	22.0833	11.7748
22.1667	4.72374	22.1667	14.351	22.1667	6.67717	26.1667	9.51478	25.5833	5.32729			22.1667	6.95042	23	3.85903	22.1667	2.81319	22.1667	6.39206	22.25	8.9918			22.1667	3.82887	22.1667	4.30815	22.1667	9.23257	23.5	7.64339	22.1667	8.47562	22.75	4.17593	22.6667	10.3244	22.1667	5.91706	22.1667	9.55586	43.25	3.49893	22.1667	3.02492	22.1667	9.94152	22.1667	11.7421
22.25	4.67068	22.25	14.2883	22.25	6.70226	26.25	9.5168	25.6667	5.37176			22.25	6.94566	23.0833	3.92546	22.25	2.86104	22.25	6.38214	22.3333	9.03938			22.25	3.79579	22.25	4.33743	22.25	9.23531	23.5833	7.6484	22.25	8.50948	22.8333	4.18829	22.75	10.346	22.25	5.89211	22.25	9.53897	43.3333	3.50629	22.25	3.06873	22.25	9.91264	22.25	11.7597
22.3333	4.70558	22.3333	14.2602	22.3333	6.67036	26.3333	9.50491	25.75	5.42343			22.3333	6.94015	23.1667	3.96877	22.3333	2.9153	22.3333	6.40158	22.4167	9.19038			22.3333	3.82178	22.3333	4.34201	22.3333	9.26089	23.6667	7.64513	22.3333	8.52546	22.9167	4.22284	22.8333	10.352	22.3333	5.9094	22.3333	9.55466	43.4167	3.55979	22.3333	3.10716	22.3333	10.0345	22.3333	11.7166
22.4167	4.6858	22.4167	14.2951	22.4167	6.69399	26.4167	9.57866	25.8333	5.44143			22.4167	6.98338	23.25	3.98526	22.4167	2.93769	22.4167	6.38869	22.5	9.22193			22.4167	3.87921	22.4167	4.34985	22.4167	9.30184	23.75	7.66893	22.4167	8.50236	23	4.22557	22.9167	10.3132	22.4167	5.91034	22.4167	9.55786	43.5	3.55423	22.4167	3.14348	22.4167	10.0738	22.4167	11.7392
22.5	4.73158	22.5	14.3869	22.5	6.72107	26.5	9.58227	25.9167	5.41429			22.5	7.08711	23.3333	3.98663	22.5	2.97824	22.5	6.39455	22.5833	9.35834			22.5	3.90563	22.5	4.3642	22.5	9.33858	23.8333	7.65347	22.5	8.43888	23.0833	4.23237	23	10.356	22.5	5.88226	22.5	9.62618	43.5833	3.5514	22.5	3.14957	22.5	10.0933	22.5	11.7648
22.5833	4.72527	22.5833	14.4773	22.5833	6.80632	26.5833	9.62429	26	5.3983			22.5833	7.11482	23.4167	3.99358	22.5833	3.05258	22.5833	6.39462	22.6667	9.50864			22.5833	3.86327	22.5833	4.37537	22.5833	9.36741	23.9167	7.6538	22.5833	8.35383	23.1667	4.20095	23.0833	10.3949	22.5833	5.80162	22.5833	9.64253	43.6667	3.49074	22.5833	3.17962	22.5833	10.0992	22.5833	11.7833
22.6667	4.83891	22.6667	14.6009	22.6667	6.87051	26.6667	9.62214	26.0833	5.41261			22.6667	7.1034	23.5	4.00798	22.6667	3.0375	22.6667	6.39518	22.75	9.53042			22.6667	3.76323	22.6667	4.33082	22.6667	9.39819	24	7.64954	22.6667	8.33912	23.25	4.21764	23.1667	10.4855	22.6667	5.69415	22.6667	9.64417	43.75	3.48475	22.6667	3.19884	22.6667	10.1433	22.6667	11.7665
22.75	4.87164	22.75	14.8641	22.75	6.91659	26.75	9.60676	26.1667	5.46962			22.75	7.04286	23.5833	4.02892	22.75	3.07951	22.75	6.42195	22.8333	9.49514			22.75	3.7318	22.75	4.27041	22.75	9.35386	24.0833	7.67643	22.75	8.34499	23.3333	4.22018	23.25	10.499	22.75	5.58667	22.75	9.58814	43.8333	3.50327	22.75	3.20931	22.75	10.1923	22.75	11.7534
22.8333	4.90912	22.8333	14.942	22.8333	6.93106	26.8333	9.56126	26.25	5.52009			22.8333	7.01699	23.6667	4.0611	22.8333	3.32893	22.8333	6.43612	22.9167	9.49019			22.8333	3.74059	22.8333	4.26273	22.8333	9.34749	24.1667	7.72093	22.8333	8.3855	23.4167	4.24899	23.3333	10.5153	22.8333	5.76426	22.8333	9.53508	43.9167	3.50474	22.8333	3.21829	22.8333	10.2563	22.8333	11.8486
22.9167	4.91868	22.9167	14.8894	22.9167	6.95408	26.9167	9.58287	26.3333	5.5084			22.9167	7.03223	23.75	4.07948	22.9167	3.64373	22.9167	6.45856	23	9.52472			22.9167	3.76176	22.9167	4.30484	22.9167	9.39098	24.25	7.72855	22.9167	8.39519	23.5	4.21455	23.4167	10.507	22.9167	5.93941	22.9167	9.53218	44	3.52027	22.9167	3.2102	22.9167	10.3466	22.9167	11.865
23	4.91498	23	14.883	23	6.97457	27	9.60112	26.4167	5.52305			23	7.06274	23.8333	4.10149	23	3.76084	23	6.45007	23.0833	9.63241			23	3.77434	23	4.31797	23	9.36505	24.3333	7.72239	23	8.48079	23.5833	4.20682	23.5	10.5127	23	5.96573	23	9.55422	44.0833	3.52398	23	3.23124	23	10.3788	23	11.8926
23.0833	4.8712	23.0833	14.8098	23.0833	7.01154	27.0833	9.63777	26.5	5.50642			23.0833	7.1036	23.9167	4.11224	23.0833	3.7448	23.0833	6.44972	23.1667	9.54113			23.0833	3.75824	23.0833	4.32121	23.0833	9.37337	24.4167	7.69325	23.0833	8.55604	23.6667	4.15926	23.5833	10.5303	23.0833	5.70685	23.0833	9.58395	44.1667	3.53144	23.0833	3.21155	23.0833	10.3988	23.0833	11.8852
23.1667	4.78437	23.1667	14.854	23.1667	7.04081	27.1667	9.64022	26.5833	5.51857			23.1667	7.13835	24	4.15288	23.1667	3.72588	23.1667	6.43077	23.25	9.5722			23.1667	3.75439	23.1667	4.34023	23.1667	9.37685	24.5	7.68335	23.1667	8.61001	23.75	4.1616	23.6667	10.5419	23.1667	5.44797	23.1667	9.62292	44.25	3.53961	23.1667	3.20479	23.1667	10.4012	23.1667	11.8978
23.25	4.77271	23.25	14.8889	23.25	7.05256	27.25	9.65571	26.6667	5.50038			23.25	7.16296	24.0833	4.14154	23.25	3.72783	23.25	6.43502	23.3333	9.60467			23.25	3.7557	23.25	4.33666	23.25	9.4977	24.5833	7.68984	23.25	8.5833	23.8333	4.14266	23.75	10.5635	23.25	5.18909	23.25	9.61933	44.3333	3.54093	23.25	3.17599	23.25	10.4462	23.25	12.0129
23.3333	4.77012	23.3333	14.9897	23.3333	7.09546	27.3333	9.67025	26.75	5.55426			23.3333	7.18932	24.1667	4.20418	23.3333	3.76486	23.3333	6.42172	23.4167	9.69824			23.3333	3.76876	23.3333	4.35178	23.3333	9.42467	24.6667	7.69438	23.3333	8.61698	23.9167	4.14965	23.8333	10.6167	23.3333	5.44189	23.3333	9.60461	44.4167	3.52717	23.3333	3.22217	23.3333	10.4733	23.3333	12.0088
23.4167	4.77194	23.4167	14.9523	23.4167	7.14881	27.4167	9.65851	26.8333	5.61912			23.4167	7.1889	24.25	4.21002	23.4167	3.80517	23.4167	6.43124	23.5	9.6484			23.4167	3.78025	23.4167	4.35599	23.4167	9.39794	24.75	7.69053	23.4167	8.65798	24	4.14365	23.9167	10.6341	23.4167	5.49257	23.4167	9.56645	44.5	3.49191	23.4167	3.24113	23.4167	10.5024	23.4167	12.0008
23.5	4.75106	23.5	14.9844	23.5	7.2416	27.5	9.66625	26.9167	5.67677			23.5	7.21045	24.3333	4.22834	23.5	3.82871	23.5	6.43774	23.5833	9.59855			23.5	3.80621	23.5	4.33812	23.5	9.2931	24.8333	7.67393	23.5	8.74499	24.0833	4.10644	24	10.6561	23.5	5.73055	23.5	9.86382	44.5833	3.46061	23.5	3.25541	23.5	10.5118	23.5	11.9425
23.5833	4.69906	23.5833	14.9863	23.5833	7.32002	27.5833	9.64622	27	5.66746			23.5833	7.22256	24.4167	4.21457	23.5833	3.81569	23.5833	6.45693	23.6667	9.59324			23.5833	3.8049	23.5833	4.30752	23.5833	9.25387	24.9167	7.66281	23.5833	8.77777	24.1667	4.05589	24.0833	10.6511	23.5833	5.82534	23.5833	10.1612	44.6667	3.5017	23.5833	3.23945	23.5833	10.5558	23.5833	11.936
23.6667	4.6744	23.6667	15.0391	23.6667	7.40423	27.6667	9.62674	27.0833	5.67221			23.6667	7.23374	24.5	4.19961	23.6667	3.80577	23.6667	6.46716	23.75	9.71519			23.6667	3.7638	23.6667	4.25753	23.6667	9.28938	25	7.67157	23.6667	8.84056	24.25	4.05817	24.1667	10.6914	23.6667	5.87543	23.6667	10.4586	44.75	3.56233	23.6667	3.21888	23.6667	10.5529	23.6667	11.946
23.75	4.63843	23.75	15.0962	23.75	7.48058	27.75	9.6138	27.1667	5.65511			23.75	7.21501	24.5833	4.21466	23.75	3.79949	23.75	6.47095	23.8333	9.83714			23.75	3.71128	23.75	4.25597	23.75	9.33243	25.0833	7.70915	23.75	8.95995	24.3333	4.11313	24.25	10.6963	23.75	5.87302	23.75	10.1826	44.8333	3.62207	23.75	3.25126	23.75	10.5963	23.75	11.8808
23.8333	4.68389	23.8333	15.1253	23.8333	7.53927	27.8333	9.61667	27.25	5.68951			23.8333	7.24777	24.6667	4.14516	23.8333	3.82276	23.8333	6.46239	23.9167	9.97099			23.8333	3.70947	23.8333	4.26395	23.8333	9.46548	25.1667	7.72035			24.4167	4.1567	24.3333	10.7115	23.8333	5.77251	23.8333	10.1823	44.9167	3.61492	23.8333	3.26427	23.8333	10.5954	23.8333	11.9031
23.9167	4.74236	23.9167	15.1995	23.9167	7.61472	27.9167	9.60152	27.3333	5.73579			23.9167	7.27422	24.75	4.12976	23.9167	3.85762	23.9167	6.46155	24	9.98632			23.9167	3.75255	23.9167	4.27006	23.9167	9.67522	25.25	7.72745			24.5	4.15958	24.4167	10.727	23.9167	5.76571	23.9167	10.1738	45	3.63119	23.9167	3.30495	23.9167	10.6186	23.9167	11.9235
24	4.81369	24	15.266	24	7.67517	28	9.60995	27.4167	5.77068			24	7.29368	24.8333	4.09494	24	3.85468	24	6.46006	24.0833	9.93207			24	3.78033	24	4.30022	24	10.0647	25.3333	7.73303			24.5833	4.18597	24.5	10.75	24	5.78124	24	10.1677	45.0833	3.63498	24	3.32049	24	10.6375	24	12.0065
24.0833	4.8649	24.0833	15.3154	24.0833	7.74468	28.0833	9.59398	27.5	5.81296			24.0833	7.27966	24.9167	4.19749	24.0833	3.82412	24.0833	6.45927	24.1667	9.90166			24.0833	3.80403	24.0833	4.29902	24.0833	10.0998	25.4167	7.74835			24.6667	4.2129	24.5833	10.7652	24.0833	5.83372	24.0833	10.1528	45.1667	3.64916	24.0833	3.32815	24.0833	10.6621	24.0833	12.0258
24.1667	4.85697	24.1667	15.3235	24.1667	7.80241	28.1667	9.63256	27.5833	5.79838			24.1667	7.27993	25	4.24175	24.1667	3.81699	24.1667	6.44241	24.25	9.92972			24.1667	3.84148	24.1667	4.29516	24.1667	10.0042	25.5	7.7501			24.75	4.24177	24.6667	10.7722	24.1667	5.75725	24.1667	10.1418	45.25	3.63534	24.1667	3.33961	24.1667	10.6711	24.1667	12.0634
24.25	4.84167	24.25	15.3199	24.25	7.85002	28.25	9.62085	27.6667	5.78927			24.25	7.2927	25.0833	4.22988	24.25	3.90921	24.25	6.44011	24.3333	9.95713			24.25	3.87797	24.25	4.25672	24.25	9.68442	25.5833	7.71287			24.8333	4.23152	24.75	10.7883	24.25	5.79565	24.25	10.1423	45.3333	3.61867	24.25	3.34224	24.25	10.6509	24.25	12.1246
24.3333	4.79949	24.3333	15.2945	24.3333	7.9231	28.3333	9.65376	27.75	5.73255			24.3333	7.27782	25.1667	4.21185	24.3333	3.96596	24.3333	6.4333	24.4167	10.006			24.3333	3.9044	24.3333	4.2597	24.3333	9.72735	25.6667	7.71694			24.9167	4.25145	24.8333	10.7747	24.3333	5.73893	24.3333	10.1381	45.4167	3.61174	24.3333	3.34941	24.3333	10.6319	24.3333	12.1613
24.4167	4.76303	24.4167	15.323	24.4167	8.01249	28.4167	9.67691	27.8333	5.70658			24.4167	7.27353	25.25	4.19397	24.4167	4.02351	24.4167	6.43918	24.5	10.0907			24.4167	3.87864	24.4167	4.23022	24.4167	9.84482	25.75	7.71977			25	4.25129	24.9167	10.7743	24.4167	5.88008	24.4167	10.1307	45.5	3.60596	24.4167	3.35618	24.4167	10.6387	24.4167	12.2012
24.5	4.75166	24.5	15.4047	24.5	8.09949	28.5	9.67361	27.9167	5.73237			24.5	7.28178	25.3333	4.17525	24.5	4.05003	24.5	6.43689	24.5833	10.1161			24.5	3.91815	24.5	4.18204	24.5	9.92538	25.8333	7.73795			25.0833	4.26194	25	10.8032	24.5	5.89032	24.5	9.93333	45.5833	3.62081	24.5	3.41014	24.5	10.6569	24.5	12.1984
24.5833	4.75375	24.5833	15.43	24.5833	8.15452	28.5833	9.60434	28	5.8139			24.5833	7.28908	25.4167	4.17337	24.5833	4.12234	24.5833	6.43191	24.6667	10.1521			24.5833	3.93906	24.5833	4.18735	24.5833	9.70595	25.9167	7.72609			25.1667	4.2467	25.0833	10.8556	24.5833	5.91437	24.5833	9.73596	45.6667	3.63017	24.5833	3.44247	24.5833	10.6375	24.5833	12.2399
24.6667	4.84735	24.6667	15.45	24.6667	8.17311	28.6667	9.5643	28.0833	5.85288			24.6667	7.30075	25.5	4.16469	24.6667	4.0856	24.6667	6.42458	24.75	10.197			24.6667	4.01761	24.6667	4.22693	24.6667	9.72043	26	7.73355			25.25	4.26012	25.1667	10.8775	24.6667	5.84328	24.6667	9.68369	45.75	3.65291	24.6667	3.46484	24.6667	10.6193	24.6667	12.2219
24.75	4.88596	24.75	15.4895	24.75	8.26479	28.75	9.63101	28.1667	5.86817			24.75	7.30568	25.5833	4.15786	24.75	4.0212	24.75	6.41254	24.8333	10.0901			24.75	3.98357	24.75	4.22485	24.75	9.66639	26.0833	7.7383			25.3333	4.25161	25.25	10.8747	24.75	5.83412	24.75	9.61055	45.8333	3.65892	24.75	3.45453	24.75	10.6075	24.75	12.269
24.8333	4.8846	24.8333	15.4925	24.8333	8.29357	28.8333	9.66502	28.25	5.88117			24.8333	7.34226	25.6667	4.15164	24.8333	3.95524	24.8333	6.42154	24.9167	10.1316			24.8333	3.97019	24.8333	4.20188	24.8333	9.5124	26.1667	7.75083			25.4167	4.27456	25.3333	10.8861	24.8333	5.91516	24.8333	9.57845	45.9167	3.63631	24.8333	3.44276	24.8333	10.6098	24.8333	12.2632
24.9167	4.86153	24.9167	15.5364	24.9167	8.33442	28.9167	9.65894	28.3333	5.92276			24.9167	7.41406	25.75	4.12618	24.9167	3.91458	24.9167	6.43417	25	10.0655			24.9167	3.95498	24.9167	4.17908	24.9167	9.63865	26.25	7.75026			25.5	4.28778	25.4167	10.9207	24.9167	6.01306	24.9167	9.60165	46	3.61686	24.9167	3.44421	24.9167	10.6217	24.9167	12.3712
25	4.76163	25	15.5218	25	8.35661	29	9.59985	28.4167	5.97707			25	7.41105	25.8333	4.16791	25	3.8785	25	6.44695	25.0833	10.0871			25	3.95919	25	4.24402	25	9.62653	26.3333	7.74248			25.5833	4.32983	25.5	10.9173	25	6.04988	25	9.65313	46.0833	3.59535	25	3.39637	25	10.6185	25	12.3837
25.0833	4.75693	25.0833	15.5697	25.0833	8.418	29.0833	9.6112	28.5	6.02893			25.0833	7.42794	25.9167	4.17026	25.0833	3.84216	25.0833	6.44207	25.1667	10.0085			25.0833	3.98719	25.0833	4.28111	25.0833	9.80312	26.4167	7.72463			25.6667	4.35288	25.5833	10.906	25.0833	6.00237	25.0833	9.6426	46.1667	3.60808	25.0833	3.37614	25.0833	10.6349	25.0833	12.4211
25.1667	4.80662	25.1667	15.6054	25.1667	8.48244	29.1667	9.61205	28.5833	6.10056			25.1667	7.37006	26	4.2591	25.1667	3.86469	25.1667	6.43886	25.25	10.0795			25.1667	3.99196	25.1667	4.29333	25.1667	9.62166	26.5	7.71667			25.75	4.36897	25.6667	10.8971	25.1667	5.98081	25.1667	9.61519	46.25	3.59627	25.1667	3.36903	25.1667	10.6192	25.1667	12.4254
25.25	4.88929	25.25	15.6711	25.25	8.52146	29.25	9.56982	28.6667	6.08289			25.25	7.40262	26.0833	4.25609	25.25	3.875	25.25	6.43589	25.3333	10.0858			25.25	4.03273	25.25	4.25595	25.25	9.68163	26.5833	7.71892			25.8333	4.36791	25.75	10.9091	25.25	6.01444	25.25	9.59277	46.3333	3.60185	25.25	3.40885	25.25	10.6328	25.25	12.4896
25.3333	4.93188	25.3333	15.6627	25.3333	8.5535	29.3333	9.5663	28.75	6.10698			25.3333	7.39584	26.1667	4.24614	25.3333	3.94278	25.3333	6.44477	25.4167	10.2217			25.3333	4.05655	25.3333	4.22391	25.3333	9.69948	26.6667	7.70709			25.9167	4.37908	25.8333	10.957	25.3333	6.02696	25.3333	9.61133	46.4167	3.59413	25.3333	3.45117	25.3333	10.6465	25.3333	12.5263
25.4167	4.90712	25.4167	15.7456	25.4167	8.63334	29.4167	9.60517	28.8333	6.08168			25.4167	7.40436	26.25	4.28012	25.4167	3.95944	25.4167	6.44857	25.5	10.3577			25.4167	4.109	25.4167	4.19518	25.4167	9.74023	26.75	7.69438			26	4.34347	25.9167	10.9898	25.4167	6.03962	25.4167	9.5947	46.5	3.61179	25.4167	3.46912	25.4167	10.6917	25.4167	12.585
25.5	4.88923	25.5	15.8032	25.5	8.65521	29.5	9.6643	28.9167	6.16634			25.5	7.40202	26.3333	4.29158	25.5	3.97973	25.5	6.44184	25.5833	10.4937			25.5	4.13333	25.5	4.17699	25.5	9.75437	26.8333	7.67887			26.0833	4.3592	26	11.2086	25.5	6.02416	25.5	9.5746	46.5833	3.60233	25.5	3.51762	25.5	10.7072	25.5	12.6116
25.5833	4.88904	25.5833	15.8457	25.5833	8.70362	29.5833	9.65888	29	6.20769			25.5833	7.37101	26.4167	4.30728	25.5833	4.04113	25.5833	6.43722	25.6667	10.6297			25.5833	4.23064	25.5833	4.18411	25.5833	9.57271	26.9167	7.71253			26.1667	4.35503	26.0833	11.1932	25.5833	6.08085	25.5833	9.58228	46.6667	3.59124	25.5833	3.54246	25.5833	10.7075	25.5833	12.612
25.6667	4.9198	25.6667	15.9061	25.6667	8.7005	29.6667	9.64271	29.0833	6.24859			25.6667	7.353	26.5	4.26101	25.6667	4.08031	25.6667	6.44023	25.75	10.7657			25.6667	4.2736	25.6667	4.21152	25.6667	9.5561	27	7.73549			26.25	4.37697	26.1667	11.3385	25.6667	6.10873	25.6667	9.57987	46.75	3.57574	25.6667	3.5548	25.6667	10.685	25.6667	12.6335
25.75	4.91163	25.75	16.0024	25.75	8.71057	29.75	9.59177	29.1667	6.22693			25.75	7.37812	26.5833	4.27621	25.75	4.12757	25.75	6.44623	25.8333	10.722			25.75	4.34557	25.75	4.20007	25.75	9.49763	27.0833	7.74004			26.3333	4.37098	26.25	11.3635	25.75	6.08148	25.75	9.59027	46.8333	3.57859	25.75	3.5532	25.75	10.6801	25.75	12.6669
25.8333	4.88474	25.8333	16.0924	25.8333	8.75335	29.8333	9.5447	29.25	6.15589			25.8333	7.44764	26.6667	4.26064	25.8333	4.08048	25.8333	6.46005	25.9167	10.644			25.8333	4.37495	25.8333	4.21347	25.8333	9.4036	27.1667	7.73929			26.4167	4.38483	26.3333	11.4927	25.8333	6.11433	25.8333	9.58271	46.9167	3.60012	25.8333	3.54919	25.8333	10.7169	25.8333	12.7593
25.9167	4.84324	25.9167	16.1185	25.9167	8.75451	29.9167	9.53066	29.3333	6.09159			25.9167	7.48602	26.75	4.23015	25.9167	4.1098	25.9167	6.46613	26	10.6096			25.9167	4.39117	25.9167	4.2108	25.9167	9.38201	27.25	7.74543			26.5	4.39291	26.4167	11.5148	25.9167	6.11995	25.9167	9.63088	47	3.61669	25.9167	3.55574	25.9167	10.7806	25.9167	12.788
26	4.80433	26	16.1016	26	8.83252	30	9.69449	29.4167	6.04876			26	7.4801	26.8333	4.20209	26	4.03607	26	6.46269	26.0833	10.5191			26	4.41469	26	4.24356	26	9.41847	27.3333	7.767			26.5833	4.38647	26.5	11.5166	26	6.23497	26	9.65793	47.0833	3.59808	26	3.51831	26	10.802	26	12.8239
26.0833	4.81402	26.0833	16.0892	26.0833	8.85423	30.0833	9.76072	29.5	6.02175			26.0833	7.47377	26.9167	4.22316	26.0833	4.03263	26.0833	6.44158	26.1667	10.36			26.0833	4.42319	26.0833	4.25895	26.0833	9.55502	27.4167	7.74936			26.6667	4.37264	26.5833	11.5144	26.0833	6.29444	26.0833	9.72284	47.1667	3.57933	26.0833	3.49102	26.0833	10.7616	26.0833	12.8047
26.1667	4.85155	26.1667	16.0665	26.1667	8.89627	30.1667	9.80923	29.5833	6.04229			26.1667	7.48508	27	4.31642	26.1667	3.98645	26.1667	6.4299	26.25	10.2979			26.1667	4.41957	26.1667	4.31498	26.1667	9.63833	27.5	7.73796			26.75	4.37908	26.6667	11.5165	26.1667	6.37137	26.1667	9.75988	47.25	3.55428	26.1667	3.46038	26.1667	10.6897	26.1667	12.8122
26.25	4.87541	26.25	16.0771	26.25	8.90551	30.25	9.85923	29.6667	6.04638			26.25	7.50546	27.0833	4.39522	26.25	4.05657	26.25	6.4205	26.3333	10.3693			26.25	4.44814	26.25	4.3327	26.25	9.89976	27.5833	7.79158			26.8333	4.37196	26.75	11.5526	26.25	6.45697	26.25	9.74294	47.3333	3.57413	26.25	3.44655	26.25	10.6795	26.25	12.7741
26.3333	4.86934	26.3333	16.0943	26.3333	8.92594	30.3333	9.86631	29.75	6.08138			26.3333	7.49568	27.1667	4.37113	26.3333	4.10988	26.3333	6.42396	26.4167	10.4957			26.3333	4.49577	26.3333	4.35729	26.3333	10.0829	27.6667	7.84328			26.9167	4.36302	26.8333	11.5672	26.3333	6.47523	26.3333	9.71392	47.4167	3.58512	26.3333	3.45661	26.3333	10.6793	26.3333	12.8434
26.4167	4.83662	26.4167	16.0932	26.4167	8.99338	30.4167	9.80521	29.8333	6.05714			26.4167	7.5328	27.25	4.38345	26.4167	4.13592	26.4167	6.42926	26.5	10.622			26.4167	4.50996	26.4167	4.34467	26.4167	10.1914	27.75	7.85014			27	4.33562	26.9167	11.5809	26.4167	6.51397	26.4167	9.64854	47.5	3.60357	26.4167	3.46681	26.4167	10.7045	26.4167	12.9159
26.5	4.85638	26.5	16.1021	26.5	9.0665	30.5	9.78083	29.9167	6.09016			26.5	7.51748	27.3333	4.3268	26.5	4.12038	26.5	6.44318	26.5833	10.6408			26.5	4.45217	26.5	4.28632	26.5	10.2755	27.8333	7.81234			27.0833	4.34668	27	11.6276	26.5	6.54604	26.5	9.66305	47.5833	3.6185	26.5	3.65081	26.5	10.683	26.5	13.0188
26.5833	4.97558	26.5833	16.1269	26.5833	9.18696	30.5833	9.99313	30	6.07497			26.5833	7.51554	27.4167	4.34953	26.5833	4.09885	26.5833	6.45699	26.6667	10.79			26.5833	4.36966	26.5833	4.28833	26.5833	10.2504	27.9167	7.80242			27.1667	4.33549	27.0833	11.644	26.5833	6.60065	26.5833	9.65805	47.6667	3.59322	26.5833	3.70293	26.5833	10.6834	26.5833	13.0814
26.6667	5.04415	26.6667	16.2314	26.6667	9.25519	30.6667	10.2054	30.0833	6.07999			26.6667	7.49811	27.5	4.32623	26.6667	4.11556	26.6667	6.4639	26.75	10.9392			26.6667	4.3271	26.6667	4.29689	26.6667	10.2338	28	7.84309			27.25	4.32862	27.1667	11.6294	26.6667	6.62013	26.6667	9.63483	47.75	3.58335	26.6667	3.73174	26.6667	10.6704	26.6667	13.1537
26.75	5.09686	26.75	16.2861	26.75	9.33134	30.75	10.3071	30.1667	6.04408			26.75	7.52082	27.5833	4.38606	26.75	4.16628	26.75	6.46941	26.8333	11.0884			26.75	4.31415	26.75	4.33284	26.75	10.1634	28.0833	7.83115			27.3333	4.30783	27.25	11.6074	26.75	6.59516	26.75	9.63251	47.8333	3.56323	26.75	3.61041	26.75	10.6713	26.75	13.2182
26.8333	5.11612	26.8333	16.3468	26.8333	9.3265	30.8333	10.4088	30.25	6.07263			26.8333	7.55316	27.6667	4.3849	26.8333	4.23374	26.8333	6.47059	26.9167	11.2375			26.8333	4.35385	26.8333	4.30178	26.8333	10.2563	28.1667	7.84173			27.4167	4.29823	27.3333	11.6067	26.8333	6.57906	26.8333	9.89569	47.9167	3.57481	26.8333	3.60206	26.8333	10.6925	26.8333	13.2449
26.9167	5.12766	26.9167	16.3757	26.9167	9.23125	30.9167	10.4441	30.3333	6.15315			26.9167	7.5577	27.75	4.34617	26.9167	4.27812	26.9167	6.47553	27	11.3867			26.9167	4.33586	26.9167	4.3821	26.9167	10.2738	28.25	7.81715			27.5	4.30666	27.4167	11.6627	26.9167	6.56805	26.9167	10.1589	48	3.56428	26.9167	3.62029	26.9167	10.7162	26.9167	13.322
27	5.11779	27	16.3452	27	9.19498	31	10.4773	30.4167	6.2577			27	7.59577	27.8333	4.29271	27	4.29116	27	6.46668	27.0833	11.5359			27	4.32793	27	4.47308	27	10.2525	28.3333	7.83631			27.5833	4.32358	27.5	11.6744	27	6.63216	27	10.4221	48.0833	3.57116	27	3.63626	27	10.7265	27	13.358
27.0833	5.06782	27.0833	16.3362	27.0833	9.10801	31.0833	10.399	30.5	6.29158			27.0833	7.58851	27.9167	4.29974	27.0833	4.28345	27.0833	6.467	27.1667	11.5648			27.0833	4.29658	27.0833	4.61569	27.0833	10.2459	28.4167	7.80391			27.6667	4.3466	27.5833	11.6737	27.0833	6.6831	27.0833	10.4304	48.1667	3.55694	27.0833	3.70405	27.0833	10.7148	27.0833	13.4303
27.1667	5.01526	27.1667	16.3248	27.1667	9.10191	31.1667	10.4245	30.5833	6.32144			27.1667	7.5778	28	4.27571	27.1667	4.26385	27.1667	6.45681	27.25	11.5541			27.1667	4.26028	27.1667	4.56271	27.1667	10.2423	28.5	7.82007			27.75	4.35048	27.6667	11.6477	27.1667	6.73398	27.1667	10.4388	48.25	3.57403	27.1667	3.89347	27.1667	10.6933	27.1667	13.4403
27.25	4.97086	27.25	16.3771	27.25	9.09232	31.25	10.4143	30.6667	6.33421			27.25	7.54743	28.0833	4.28552	27.25	4.32093	27.25	6.45038	27.3333	11.5403			27.25	4.2559	27.25	4.51807	27.25	10.2743	28.5833	7.78235			27.8333	4.32941	27.75	11.6122	27.25	6.75405	27.25	10.4049	48.3333	3.57952	27.25	4.08289	27.25	10.6778	27.25	13.4509
27.3333	4.96476	27.3333	16.4329	27.3333	9.119	31.3333	10.2168	30.75	6.34116			27.3333	7.5354	28.1667	4.26281	27.3333	4.4034	27.3333	6.43516	27.4167	11.468			27.3333	4.24372	27.3333	4.49315	27.3333	10.247	28.6667	7.75568			27.9167	4.32608	27.8333	11.6285	27.3333	6.73114	27.3333	10.4581	48.4167	3.59425	27.3333	4.07771	27.3333	10.6733	27.3333	13.4453
27.4167	4.96381	27.4167	16.4337	27.4167	9.12714	31.4167	10.0193	30.8333	6.33332			27.4167	7.50459	28.25	4.32905	27.4167	4.45388	27.4167	6.42993	27.5	11.4791			27.4167	4.2478	27.4167	4.4036	27.4167	10.2642	28.75	7.73823			28	4.34048	27.9167	11.617	27.4167	6.73118	27.4167	10.4594	48.5	3.59079	27.4167	4.11041	27.4167	10.6922	27.4167	13.4814
27.5	4.95952	27.5	16.4043	27.5	9.14164	31.5	10.2516	30.9167	6.32546			27.5	7.47965	28.3333	4.26079	27.5	4.45299	27.5	6.42821	27.5833	11.4674			27.5	4.26115	27.5	4.46459	27.5	10.3173	28.8333	7.73227			28.0833	4.34307	28	11.6318	27.5	6.68432	27.5	10.4958	48.5833	3.58527	27.5	4.11529	27.5	10.7251	27.5	13.5319
27.5833	4.99386	27.5833	16.3769	27.5833	9.24556	31.5833	10.3303	31	6.33038			27.5833	7.47482	28.4167	4.27592	27.5833	4.46386	27.5833	6.42982	27.6667	11.3755			27.5833	4.28963	27.5833	4.4587	27.5833	10.3274	28.9167	7.73828			28.1667	4.33218	28.0833	11.6287	27.5833	6.70201	27.5833	10.1943	48.6667	3.58096	27.5833	4.13393	27.5833	10.7504	27.5833	13.5598
27.6667	4.99388	27.6667	16.3171	27.6667	9.28238	31.6667	10.4091	31.0833	6.3139			27.6667	7.49416	28.5	4.25647	27.6667	4.47874	27.6667	6.42374	27.75	11.2837			27.6667	4.28885	27.6667	4.48812	27.6667	10.328	29	7.72775			28.25	4.31603	28.1667	11.622	27.6667	6.59119	27.6667	9.89277	48.75	3.58894	27.6667	4.08787	27.6667	10.7901	27.6667	13.5461
27.75	4.99389	27.75	16.326	27.75	9.28773	31.75	10.4696	31.1667	6.31348			27.75	7.51436	28.5833	4.26417	27.75	4.48278	27.75	6.39947	27.8333	11.1918			27.75	4.27489	27.75	4.41643	27.75	10.331	29.0833	7.71837			28.3333	4.32085	28.25	11.5835	27.75	6.58211	27.75	9.92241	48.8333	3.59427	27.75	4.06973	27.75	10.8299	27.75	13.5206
27.8333	4.97039	27.8333	16.3103	27.8333	9.09485	31.8333	10.5027	31.25	6.30575			27.8333	7.5464	28.6667	4.28592	27.8333	4.46901	27.8333	6.36061	27.9167	11.1546			27.8333	4.24361	27.8333	4.3652	27.8333	10.3598	29.1667	7.72481			28.4167	4.31904	28.3333	11.5775	27.8333	6.5328	27.8333	10.1634	48.9167	3.59776	27.8333	4.01065	27.8333	10.8462	27.8333	13.5447
27.9167	5.00247	27.9167	16.3683	27.9167	9.02269	31.9167	10.5526	31.3333	6.33278			27.9167	7.5843	28.75	4.33025	27.9167	4.47329	27.9167	6.35519	28	11.1765			27.9167	4.25232	27.9167	4.30957	27.9167	10.3489	29.25	7.71163			28.5	4.33194	28.4167	11.605	27.9167	6.58691	27.9167	10.4044	49	3.59653	27.9167	4.05047	27.9167	10.8275	27.9167	13.546
28	5.02367	28	16.3839	28	9.00517	32	10.5792	31.4167	6.34144			28	7.56569	28.8333	4.38812	28	4.48981	28	6.3646	28.0833	11.3276			28	4.2547	28	4.30283	28	10.3383	29.3333	7.72753			28.5833	4.33923	28.5	11.6219	28	6.6076	28	10.4079	49.0833	3.56847	28	4.08111	28	10.8449	28	13.5847
28.0833	5.03497	28.0833	16.4241	28.0833	9.06361	32.0833	10.6439	31.5	6.36608			28.0833	7.53714	28.9167	4.35109	28.0833	4.50276	28.0833	6.37857	28.1667	11.3183			28.0833	4.27023	28.0833	4.27652	28.0833	10.339	29.4167	7.73073			28.6667	4.3379	28.5833	11.6288	28.0833	6.62071	28.0833	10.4115	49.1667	3.56555	28.0833	4.17245	28.0833	10.8617	28.0833	13.5856
28.1667	5.02087	28.1667	16.4524	28.1667	9.21099	32.1667	10.6401	31.5833	6.39167			28.1667	7.52737	29	4.32672	28.1667	4.5174	28.1667	6.3545	28.25	11.227			28.1667	4.26664	28.1667	4.31215	28.1667	10.3768	29.5	7.74703			28.75	4.31205	28.6667	11.6351	28.1667	6.73352	28.1667	10.418	49.25	3.55565	28.1667	4.17917	28.1667	10.8829	28.1667	13.6257
28.25	5.05411	28.25	16.516	28.25	9.44693	32.25	10.6325	31.6667	6.43438			28.25	7.56116	29.0833	4.26794	28.25	4.5302	28.25	6.35419	28.3333	11.0825			28.25	4.28484	28.25	4.26209	28.25	10.327	29.5833	7.74126			28.8333	4.30045	28.75	11.6595	28.25	6.76142	28.25	10.46	49.3333	3.58695	28.25	4.23527	28.25	10.865	28.25	13.6303
28.3333	5.08997	28.3333	16.5468	28.3333	9.50712	32.3333	10.5504	31.75	6.46063			28.3333	7.58554	29.1667	4.28606	28.3333	4.51971	28.3333	6.36203	28.4167	11.1295			28.3333	4.25606	28.3333	4.27753	28.3333	10.289	29.6667	7.74481			28.9167	4.30716	28.8333	11.6707	28.3333	6.79243	28.3333	10.4773	49.4167	3.58618	28.3333	4.23033	28.3333	10.8503	28.3333	13.652
28.4167	5.10579	28.4167	16.5519	28.4167	9.46137	32.4167	10.533	31.8333	6.44975			28.4167	7.58247	29.25	4.30537	28.4167	4.50829	28.4167	6.37327	28.5	11.268			28.4167	4.25109	28.4167	4.27115	28.4167	10.163	29.75	7.72625			29	4.32548	28.9167	11.6694	28.4167	6.70558	28.4167	10.5003	49.5	3.60289	28.4167	4.26354	28.4167	10.8513	28.4167	13.6571
28.5	5.09929	28.5	16.5501	28.5	9.23707	32.5	10.5442	31.9167	6.38398			28.5	7.58059	29.3333	4.31822	28.5	4.52923	28.5	6.36019	28.5833	11.4066			28.5	4.25058	28.5	4.33979	28.5	10.2873	29.8333	7.7204			29.0833	4.35086	29	11.6418	28.5	6.66053	28.5	10.4911	49.5833	3.59169	28.5	4.26732	28.5	10.8833	28.5	13.6602
28.5833	5.07393	28.5833	16.6017	28.5833	9.14895	32.5833	10.6259	32	6.39507			28.5833	7.58152	29.4167	4.26572	28.5833	4.57231	28.5833	6.35457	28.6667	11.466			28.5833	4.30751	28.5833	4.41262	28.5833	10.2694	29.9167	7.70127			29.1667	4.3663	29.0833	11.6373	28.5833	6.68161	28.5833	10.4857	49.6667	3.60445	28.5833	4.27442	28.5833	10.9117	28.5833	13.672
28.6667	5.04875	28.6667	16.6858	28.6667	9.40817	32.6667	10.6798	32.0833	6.38007			28.6667	7.61833	29.5	4.24982	28.6667	4.64816	28.6667	6.34766	28.75	11.5176			28.6667	4.35959	28.6667	4.40605	28.6667	10.3716	30	7.71332			29.25	4.38456	29.1667	11.6514	28.6667	6.69955	28.6667	10.4791	49.75	3.59945	28.6667	4.30129	28.6667	10.9627	28.6667	13.6988
28.75	5.00715	28.75	16.7719	28.75	9.52208	32.75	10.7023	32.1667	6.40938			28.75	7.6045	29.5833	4.21703	28.75	4.72709	28.75	6.36508	28.8333	11.4802			28.75	4.38681	28.75	4.40659	28.75	10.3992	30.0833	7.71414			29.3333	4.38268	29.25	11.6615	28.75	6.69206	28.75	10.224	49.8333	3.58871	28.75	4.28142	28.75	10.9741	28.75	13.7154
28.8333	4.94886	28.8333	16.8346	28.8333	9.67282	32.8333	10.7607	32.25	6.36846			28.8333	7.61176	29.6667	4.21186	28.8333	4.74478	28.8333	6.36299	28.9167	11.4331			28.8333	4.37543	28.8333	4.40873	28.8333	10.4749	30.1667	7.7125			29.4167	4.35448	29.3333	11.6188	28.8333	6.64769	28.8333	9.96886	49.9167	3.58369	28.8333	4.2429	28.8333	10.9978	28.8333	13.7139
28.9167	4.9122	28.9167	16.8699	28.9167	9.6664	32.9167	10.7723	32.3333	6.34271			28.9167	7.56882	29.75	4.19322	28.9167	4.685	28.9167	6.33012	29	11.5021			28.9167	4.36508	28.9167	4.46102	28.9167	10.4767	30.25	7.69188			29.5	4.35901	29.4167	11.5838	28.9167	6.66593	28.9167	9.89699	50	3.57477	28.9167	4.18049	28.9167	10.9988	28.9167	13.7178
29	4.95737	29	16.9193	29	9.64907	33	10.786	32.4167	6.33099			29	7.58471	29.8333	4.2088	29	4.71696	29	6.30902	29.0833	11.5322			29	4.3413	29	4.49128	29	10.4678	30.3333	7.6869			29.5833	4.34981	29.5	11.5581	29	6.89919	29	9.81561	50.0833	3.57701	29	4.25364	29	11.0424	29	13.7889
29.0833	4.98483	29.0833	16.9507	29.0833	9.73903	33.0833	10.7564	32.5	6.32826			29.0833	7.55959	29.9167	4.21744	29.0833	4.75028	29.0833	6.3026	29.1667	11.5398			29.0833	4.40131	29.0833	4.47183	29.0833	10.4599	30.4167	7.66656			29.6667	4.38523	29.5833	11.5923	29.0833	6.91069	29.0833	9.82925	50.1667	3.57398	29.0833	4.31314	29.0833	11.096	29.0833	13.8826
29.1667	5.0239	29.1667	17.0098	29.1667	9.82899	33.1667	10.7811	32.5833	6.35301			29.1667	7.57793	30	4.23091	29.1667	4.79779	29.1667	6.3447	29.25	11.5299			29.1667	4.42602	29.1667	4.46302	29.1667	10.4566	30.5	7.67784			29.75	4.37123	29.6667	11.603	29.1667	6.93403	29.1667	9.82862	50.25	3.57715	29.1667	4.32876	29.1667	11.1135	29.1667	13.9399
29.25	4.98176	29.25	17.063	29.25	9.95606	33.25	10.7906	32.6667	6.3515			29.25	7.58174	30.0833	4.2394	29.25	4.8335	29.25	6.36043	29.3333	11.5426			29.25	4.45484	29.25	4.41648	29.25	10.4657	30.5833	7.66647			29.8333	4.36072	29.75	11.6368	29.25	6.73899	29.25	9.81586	50.3333	3.58931	29.25	4.32725	29.25	11.1071	29.25	13.9246
29.3333	4.99135	29.3333	17.1135	29.3333	9.94203	33.3333	10.7708	32.75	6.36984			29.3333	7.59291	30.1667	4.2429	29.3333	4.78358	29.3333	6.39404	29.4167	11.5714			29.3333	4.49365	29.3333	4.36743	29.3333	10.4589	30.6667	7.69426			29.9167	4.35435	29.8333	11.6172	29.3333	6.78506	29.3333	9.84832	50.4167	3.60167	29.3333	4.29124	29.3333	11.0764	29.3333	13.9005
29.4167	4.95497	29.4167	17.1611	29.4167	9.91944	33.4167	10.6752	32.8333	6.33477			29.4167	7.60753	30.25	4.24062	29.4167	4.76764	29.4167	6.41507	29.5	11.5789			29.4167	4.51737	29.4167	4.33181	29.4167	10.4706	30.75	7.71822			30	4.34642	29.9167	11.5834	29.4167	6.81942	29.4167	9.83107	50.5	3.60341	29.4167	4.25706	29.4167	11.0871	29.4167	13.9354
29.5	4.94737	29.5	17.1785	29.5	9.89685	33.5	10.6457	32.9167	6.3568			29.5	7.60897	30.3333	4.2729	29.5	4.67112	29.5	6.43307	29.5833	11.5797			29.5	4.54068	29.5	4.30897	29.5	10.4703	30.8333	7.74285			30.0833	4.34815	30	11.5385	29.5	6.85743	29.5	9.92449	50.5833	3.59796	29.5	4.23299	29.5	11.0902	29.5	14.0196
29.5833	4.95355	29.5833	17.2459	29.5833	9.89993	33.5833	10.6045	33	6.36852			29.5833	7.59454	30.4167	4.2919	29.5833	4.70143	29.5833	6.44484	29.6667	11.5957			29.5833	4.52912	29.5833	4.30833	29.5833	10.5045	30.9167	7.74255			30.1667	4.35316	30.0833	11.5339	29.5833	6.87019	29.5833	9.89482	50.6667	3.59053	29.5833	4.31291	29.5833	11.1172	29.5833	14.0581
29.6667	4.95916	29.6667	17.3146	29.6667	10.0348	33.6667	10.6916	33.0833	6.40781			29.6667	7.55154	30.5	4.2925	29.6667	4.73485	29.6667	6.43336	29.75	11.5896			29.6667	4.49448	29.6667	4.33147	29.6667	10.5121	31	7.7267			30.25	4.33196	30.1667	11.5464	29.6667	6.9186	29.6667	9.99844	50.75	3.59056	29.6667	4.38282	29.6667	11.1369	29.6667	14.0858
29.75	4.94415	29.75	17.3682	29.75	10.1052	33.75	10.7595	33.1667	6.36703			29.75	7.53769	30.5833	4.23973	29.75	4.79806	29.75	6.42628	29.8333	11.6097			29.75	4.461	29.75	4.35411	29.75	10.5258	31.0833	7.70513			30.3333	4.33327	30.25	11.5752	29.75	6.89903	29.75	10.1415	50.8333	3.5796	29.75	4.3756	29.75	11.1792	29.75	14.0506
29.8333	4.94843	29.8333	17.4308	29.8333	10.0827	33.8333	10.7855	33.25	6.3835			29.8333	7.57565	30.6667	4.221	29.8333	4.83227	29.8333	6.41379	29.9167	11.6381			29.8333	4.41431	29.8333	4.44729	29.8333	10.5186	31.1667	7.71635			30.4167	4.36187	30.3333	11.5664	29.8333	6.93863	29.8333	10.2846	50.9167	3.58473	29.8333	4.33947	29.8333	11.2142	29.8333	14.0387
29.9167	4.9733	29.9167	17.451	29.9167	10.1015	33.9167	10.7456	33.3333	6.39218			29.9167	7.58618	30.75	4.21017	29.9167	4.88402	29.9167	6.43107	30	11.6629			29.9167	4.50078	29.9167	4.42685	29.9167	10.5302	31.25	7.71766			30.5	4.38655	30.4167	11.5907	29.9167	6.89249	29.9167	10.3362	51	3.59999	29.9167	4.33768	29.9167	11.2593	29.9167	14.0249
30	4.97436	30	17.5404	30	10.0207	34	10.6553	33.4167	6.42485			30	7.59814	30.8333	4.25202	30	4.9492	30	6.41769	30.0833	11.6533			30	4.51238	30	4.37593	30	10.5185	31.3333	7.70785			30.5833	4.38673	30.5	11.5924	30	6.93821	30	10.3827	51.0833	3.61904	30	4.38557	30	11.2769	30	14.0767
30.0833	4.94479	30.0833	17.5984	30.0833	10.1417	34.0833	10.6784	33.5	6.38476			30.0833	7.61324	30.9167	4.25193	30.0833	4.92884	30.0833	6.3976	30.1667	11.6298			30.0833	4.55244	30.0833	4.32671	30.0833	10.4986	31.4167	7.70799			30.6667	4.36768	30.5833	11.6033	30.0833	6.89091	30.0833	10.3952	51.1667	3.61983	30.0833	4.42865	30.0833	11.2304	30.0833	14.1096
30.1667	4.89097	30.1667	17.6718	30.1667	10.0829	34.1667	10.6592	33.5833	6.37776			30.1667	7.60916	31	4.23928	30.1667	5.01096	30.1667	6.36215	30.25	11.6161			30.1667	4.54176	30.1667	4.32098	30.1667	10.4669	31.5	7.71978			30.75	4.35839	30.6667	11.6033	30.1667	6.92352	30.1667	10.4556	51.25	3.58912	30.1667	4.44586	30.1667	11.1795	30.1667	14.173
30.25	4.93646	30.25	17.6825	30.25	10.1529	34.25	10.6565	33.6667	6.39325			30.25	7.58846	31.0833	4.23649	30.25	4.97791	30.25	6.35799	30.3333	11.6096			30.25	4.55219	30.25	4.28926	30.25	10.4599	31.5833	7.73814			30.8333	4.36688	30.75	11.6226	30.25	6.94192	30.25	10.442	51.3333	3.60872	30.25	4.43313	30.25	11.1188	30.25	14.2282
30.3333	4.96626	30.3333	17.69	30.3333	10.1527	34.3333	10.6281	33.75	6.48123			30.3333	7.56341	31.1667	4.27223	30.3333	5.07512	30.3333	6.35145	30.4167	11.6087			30.3333	4.54094	30.3333	4.29705	30.3333	10.4645	31.6667	7.74652			30.9167	4.3806	30.8333	11.652	30.3333	7.01855	30.3333	10.4108	51.4167	3.62139	30.3333	4.41236	30.3333	11.1317	30.3333	14.2991
30.4167	4.9851	30.4167	17.687	30.4167	10.2248	34.4167	10.6432	33.8333	6.61629			30.4167	7.56399	31.25	4.31864	30.4167	5.08321	30.4167	6.36065	30.5	11.605			30.4167	4.51319	30.4167	4.3266	30.4167	10.4559	31.75	7.75626			31	4.38611	30.9167	11.7034	30.4167	7.05498	30.4167	10.2859	51.5	3.64235	30.4167	4.41109	30.4167	11.1852	30.4167	14.3372
30.5	5.01224	30.5	17.716	30.5	10.2252	34.5	10.7221	33.9167	6.73825			30.5	7.59949	31.3333	4.30057	30.5	5.07947	30.5	6.34674	30.5833	11.613			30.5	4.53352	30.5	4.34248	30.5	10.4749	31.8333	7.77742			31.0833	4.38464	31	11.6932	30.5	7.02599	30.5	10.3306	51.5833	3.61064	30.5	4.43277	30.5	11.2226	30.5	14.3731
30.5833	5.02499	30.5833	17.7518	30.5833	10.3615	34.5833	10.7275	34	6.79353			30.5833	7.61045	31.4167	4.30286	30.5833	5.05873	30.5833	6.32906	30.6667	11.6123			30.5833	4.55436	30.5833	4.43664	30.5833	10.4662	31.9167	7.82154			31.1667	4.34822	31.0833	11.6963	30.5833	7.09155	30.5833	10.3386	51.6667	3.60662	30.5833	4.4583	30.5833	11.2415	30.5833	14.3749
30.6667	5.03475	30.6667	17.7806	30.6667	10.2755	34.6667	10.8295	34.0833	6.78366			30.6667	7.65726	31.5	4.25967	30.6667	5.04237	30.6667	6.31351	30.75	11.5999			30.6667	4.55598	30.6667	4.36629	30.6667	10.4729	32	7.84404			31.25	4.32661	31.1667	11.7104	30.6667	7.0648	30.6667	10.1398	51.75	3.61647	30.6667	4.41935	30.6667	11.1944	30.6667	14.4115
30.75	5.02069	30.75	17.7727	30.75	10.3869	34.75	10.8179	34.1667	6.73186			30.75	7.66457	31.5833	4.268	30.75	5.10096	30.75	6.3359	30.8333	11.6081			30.75	4.53886	30.75	4.34514	30.75	10.4608	32.0833	7.85876			31.3333	4.32355	31.25	11.7231	30.75	7.05437	30.75	9.94098	51.8333	3.63219	30.75	4.40049	30.75	11.1962	30.75	14.4174
30.8333	4.99425	30.8333	17.747	30.8333	10.2879	34.8333	10.8085	34.25	6.72881			30.8333	7.73113	31.6667	4.27968	30.8333	5.16486	30.8333	6.35363	30.9167	11.5813			30.8333	4.5474	30.8333	4.28023	30.8333	10.4606	32.1667	7.89237			31.4167	4.3322	31.3333	11.7352	30.8333	7.05943	30.8333	9.89985	51.9167	3.61172	30.8333	4.36689	30.8333	11.2181	30.8333	14.4729
30.9167	5.00986	30.9167	17.7383	30.9167	10.2934	34.9167	10.7795	34.3333	6.75796			30.9167	7.7142	31.75	4.30315	30.9167	5.23751	30.9167	6.3707	31	11.5807			30.9167	4.56655	30.9167	4.2611	30.9167	10.4827	32.25	7.92356			31.5	4.34786	31.4167	11.6969	30.9167	7.08898	30.9167	9.87476	52	3.59209	30.9167	4.40013	30.9167	11.2529	30.9167	14.5206
31	5.08186	31	17.7426	31	10.422	35	10.7908	34.4167	6.78891			31	7.69611	31.8333	4.35284	31	5.2901	31	6.36733	31.0833	11.5802			31	4.58193	31	4.2515	31	10.4972	32.3333	7.94422			31.5833	4.36913	31.5	11.7194	31	7.16126	31	9.89689	52.0833	3.57606	31	4.41597	31	11.2401	31	14.5654
31.0833	5.15663	31.0833	17.7835	31.0833	10.4101	35.0833	10.9555	34.5	6.7613			31.0833	7.63755	31.9167	4.34894	31.0833	5.30053	31.0833	6.38256	31.1667	11.6264			31.0833	4.56682	31.0833	4.29281	31.0833	10.5171	32.4167	7.92953			31.6667	4.36295	31.5833	11.757	31.0833	7.1286	31.0833	9.91134	52.1667	3.59844	31.0833	4.40858	31.0833	11.1598	31.0833	14.6185
31.1667	5.17009	31.1667	17.8476	31.1667	10.3981	35.1667	10.923	34.5833	6.71087			31.1667	7.65599	32	4.41751	31.1667	5.36359	31.1667	6.37924	31.25	11.6515			31.1667	4.56845	31.1667	4.28886	31.1667	10.505	32.5	7.94739			31.75	4.39559	31.6667	11.7785	31.1667	7.09961	31.1667	9.91951	52.25	3.60079	31.1667	4.39402	31.1667	11.1036	31.1667	14.6976
31.25	5.1574	31.25	17.9397	31.25	10.3861	35.25	11.0434	34.6667	6.66269			31.25	7.64504	32.0833	4.43498	31.25	5.34576	31.25	6.38502	31.3333	11.6398			31.25	4.56429	31.25	4.34958	31.25	10.4938	32.5833	7.95525			31.8333	4.39598	31.75	11.7561	31.25	7.10218	31.25	9.91113	52.3333	3.60466	31.25	4.37574	31.25	11.1298	31.25	14.7438
31.3333	5.1213	31.3333	18.0085	31.3333	10.14	35.3333	10.9935	34.75	6.64641			31.3333	7.63239	32.1667	4.48724	31.3333	5.37242	31.3333	6.38465	31.4167	11.6302			31.3333	4.58231	31.3333	4.29147	31.3333	10.4869	32.6667	7.94259			31.9167	4.42208	31.8333	11.7164	31.3333	7.23792	31.3333	9.93834	52.4167	3.58238	31.3333	4.44603	31.3333	11.1885	31.3333	14.8065
31.4167	5.17695	31.4167	18.0977	31.4167	10.0581	35.4167	11.2348	34.8333	6.65988			31.4167	7.6296	32.25	4.51768	31.4167	5.34252	31.4167	6.39169	31.5	11.6447			31.4167	4.57511	31.4167	4.38759	31.4167	10.4907	32.75	7.94136			32	4.41416	31.9167	11.7182	31.4167	7.30823	31.4167	9.9399	52.5	3.57902	31.4167	4.54897	31.4167	11.197	31.4167	14.858
31.5	5.22263	31.5	18.1697	31.5	10.0864	35.5	11.476	34.9167	6.65551			31.5	7.66325	32.3333	4.56049	31.5	5.35212	31.5	6.40259	31.5833	11.6987			31.5	4.61111	31.5	4.37714	31.5	10.4967	32.8333	7.96523			32.0833	4.42219	32	11.7143	31.5	7.41294	31.5	9.94268	52.5833	3.58282	31.5	4.60124	31.5	11.1661	31.5	14.8969
31.5833	5.2596	31.5833	18.2459	31.5833	10.124	35.5833	11.532	35	6.68586			31.5833	7.69085	32.4167	4.52711	31.5833	5.36578	31.5833	6.41213	31.6667	11.7164			31.5833	4.61308	31.5833	4.42298	31.5833	10.4956	32.9167	7.97355			32.1667	4.43324	32.0833	11.7416	31.5833	7.42659	31.5833	9.94317	52.6667	3.60083	31.5833	4.63116	31.5833	11.1848	31.5833	14.9225
31.6667	5.2608	31.6667	18.2748	31.6667	10.0368	35.6667	11.5445	35.0833	6.68802			31.6667	7.6811	32.5	4.51555	31.6667	5.39729	31.6667	6.4322	31.75	11.7184			31.6667	4.62541	31.6667	4.41034	31.6667	10.5021	33	7.99494			32.25	4.43004	32.1667	11.7753	31.6667	7.50586	31.6667	9.92055	52.75	3.61275	31.6667	4.64775	31.6667	11.211	31.6667	14.9294
31.75	5.25036	31.75	18.2856	31.75	10.046	35.75	11.5693	35.1667	6.68534			31.75	7.68895	32.5833	4.47326	31.75	5.42047	31.75	6.42862	31.8333	11.6632			31.75	4.60639	31.75	4.48736	31.75	10.5086	33.0833	8.01666			32.3333	4.40176	32.25	11.9013	31.75	7.56066	31.75	9.8915	52.8333	3.62661	31.75	4.68129	31.75	11.254	31.75	14.9205
31.8333	5.23957	31.8333	18.3173	31.8333	10.0562	35.8333	11.5638	35.25	6.69971			31.8333	7.68308	32.6667	4.46618	31.8333	5.37455	31.8333	6.42177	31.9167	11.6413			31.8333	4.58408	31.8333	4.48589	31.8333	10.5328	33.1667	8.07518			32.4167	4.37426	32.3333	11.9088	31.8333	7.65147	31.8333	9.85153	52.9167	3.65716	31.8333	4.6818	31.8333	11.2337	31.8333	14.979
31.9167	5.2226	31.9167	18.3243	31.9167	10.135	35.9167	11.577	35.3333	6.68059			31.9167	7.73474	32.75	4.38809	31.9167	5.3154	31.9167	6.41264	32	11.6547			31.9167	4.51267	31.9167	4.43661	31.9167	10.5435	33.25	8.06761			32.5	4.35398	32.4167	11.9163	31.9167	7.72056	31.9167	9.86646	53	3.68224	31.9167	4.71778	31.9167	11.226	31.9167	15.0278
32	5.21859	32	18.3599	32	10.0748	36	11.5928	35.4167	6.72675			32	7.73488	32.8333	4.40601	32	5.28489	32	6.41335	32.0833	11.678			32	4.47987	32	4.37922	32	10.5437	33.3333	8.05457			32.5833	4.36678	32.5	11.9092	32	7.78615	32	9.94462	53.0833	3.68579	32	4.73319	32	11.2376	32	15.0803
32.0833	5.20251	32.0833	18.3722	32.0833	9.98627	36.0833	11.6474	35.5	6.70613			32.0833	7.84063	32.9167	4.41045	32.0833	5.28802	32.0833	6.39067	32.1667	11.7147			32.0833	4.4878	32.0833	4.39246	32.0833	10.5449	33.4167	8.0374			32.6667	4.35211	32.5833	11.8407	32.0833	7.73111	32.0833	9.93864	53.1667	3.66817	32.0833	4.7473	32.0833	11.2334	32.0833	15.1115
32.1667	5.17305	32.1667	18.3942	32.1667	9.95417	36.1667	11.6407	35.5833	6.77989			32.1667	7.90205	33	4.43719	32.1667	5.35551	32.1667	6.39814	32.25	11.6771			32.1667	4.54125	32.1667	4.40457	32.1667	10.5385	33.5	8.06318			32.75	4.35938	32.6667	11.8516	32.1667	7.77546	32.1667	9.99821	53.25	3.65191	32.1667	4.7448	32.1667	11.218	32.1667	15.1591
32.25	5.17603	32.25	18.4212	32.25	10.0958	36.25	11.6458	35.6667	6.79506			32.25	7.94576	33.0833	4.44527	32.25	5.37925	32.25	6.38009	32.3333	11.6717			32.25	4.5661	32.25	4.46061	32.25	10.541	33.5833	8.07419			32.8333	4.35304	32.75	11.8285	32.25	7.76824	32.25	9.95825	53.3333	3.65378	32.25	4.74515	32.25	11.1864	32.25	15.2051
32.3333	5.18921	32.3333	18.4829	32.3333	10.4026	36.3333	11.6165	35.75	6.79378			32.3333	7.96503	33.1667	4.51387	32.3333	5.39555	32.3333	6.39684	32.4167	11.6457			32.3333	4.58447	32.3333	4.42874	32.3333	10.5217	33.6667	8.05373			32.9167	4.38181	32.8333	11.8721	32.3333	7.78976	32.3333	9.96414	53.4167	3.66223	32.3333	4.75717	32.3333	11.209	32.3333	15.2407
32.4167	5.21342	32.4167	18.5665	32.4167	10.2402	36.4167	11.6041	35.8333	6.79002			32.4167	7.98279	33.25	4.55337	32.4167	5.32792	32.4167	6.4144	32.5	11.6663			32.4167	4.66659	32.4167	4.4064	32.4167	10.4963	33.75	8.05443			33	4.39109	32.9167	11.8959	32.4167	7.78355	32.4167	9.96751	53.5	3.70533	32.4167	4.7468	32.4167	11.2463	32.4167	15.2517
32.5	5.208	32.5	18.6016	32.5	10.2558	36.5	11.6928	35.9167	6.77955			32.5	7.99262	33.3333	4.57419	32.5	5.33457	32.5	6.43675	32.5833	11.6759			32.5	4.62136	32.5	4.39471	32.5	10.4696	33.8333	8.03363			33.0833	4.37091	33	11.9705	32.5	7.86448	32.5	9.97778	53.5833	3.69421	32.5	4.74447	32.5	11.2428	32.5	15.2172
32.5833	5.20517	32.5833	18.6128	32.5833	10.2384	36.5833	11.7013	36	6.77113			32.5833	8.00519	33.4167	4.54715	32.5833	5.31797	32.5833	6.43142	32.6667	11.6935			32.5833	4.62452	32.5833	4.36994	32.5833	10.4312	33.9167	8.07822			33.1667	4.36171	33.0833	12.0451	32.5833	7.9409	32.5833	10.006	53.6667	3.67713	32.5833	4.76555	32.5833	11.2094	32.5833	15.1688
32.6667	5.19624	32.6667	18.607	32.6667	10.3773	36.6667	11.6785	36.0833	6.78082			32.6667	7.99209	33.5	4.50832	32.6667	5.26667	32.6667	6.40807	32.75	11.7098			32.6667	4.53456	32.6667	4.37664	32.6667	10.4121	34	8.09236			33.25	4.34356	33.1667	11.9848	32.6667	7.94616	32.6667	9.97042	53.75	3.61839	32.6667	4.77826	32.6667	11.1872	32.6667	15.1675
32.75	5.20749	32.75	18.6265	32.75	10.3495	36.75	11.564	36.1667	6.8165			32.75	7.97606	33.5833	4.4936	32.75	5.26175	32.75	6.4157	32.8333	11.7058			32.75	4.58052	32.75	4.33382	32.75	10.4088	34.0833	8.16204			33.3333	4.35974	33.25	11.8725	32.75	7.86818	32.75	9.95985	53.8333	3.62608	32.75	4.80012	32.75	11.1915	32.75	15.168
32.8333	5.19897	32.8333	18.6379	32.8333	10.363	36.8333	11.5526	36.25	6.89952			32.8333	7.96261	33.6667	4.56684	32.8333	5.25867	32.8333	6.43183	32.9167	11.689			32.8333	4.53393	32.8333	4.30654	32.8333	10.3759	34.1667	8.16007			33.4167	4.3783	33.3333	11.8391	32.8333	7.8423	32.8333	9.95646	53.9167	3.64795	32.8333	4.79236	32.8333	11.1939	32.8333	15.1957
32.9167	5.19433	32.9167	18.6529	32.9167	10.2768	36.9167	11.6348	36.3333	6.88698			32.9167	8.04543	33.75	4.60059	32.9167	5.31143	32.9167	6.43095	33	11.6588			32.9167	4.54878	32.9167	4.33499	32.9167	10.3981	34.25	8.12826			33.5	4.39861	33.4167	11.8545	32.9167	7.80787	32.9167	9.9731	54	3.67326	32.9167	4.82207	32.9167	11.1741	32.9167	15.1778
33	5.18928	33	18.6895	33	10.3855	37	11.659	36.4167	6.83361			33	8.07332	33.8333	4.58785	33	5.41495	33	6.43101	33.0833	11.6663			33	4.53666	33	4.3411	33	10.4013	34.3333	8.02859			33.5833	4.42526	33.5	11.9181	33	7.78446	33	10.035	54.0833	3.67966	33	4.84138	33	11.1648	33	15.227
33.0833	5.19545	33.0833	18.7601	33.0833	10.4383	37.0833	11.685	36.5	6.69941			33.0833	8.11744	33.9167	4.53125	33.0833	5.46074	33.0833	6.41887	33.1667	11.7151			33.0833	4.54285	33.0833	4.39686	33.0833	10.442	34.4167	7.98396			33.6667	4.41372	33.5833	11.9078	33.0833	7.76285	33.0833	10.0832	54.1667	3.66486	33.0833	4.94604	33.0833	11.1515	33.0833	15.2471
33.1667	5.213	33.1667	18.8194	33.1667	10.5765	37.1667	11.7018	36.5833	6.66415			33.1667	8.12036	34	4.51682	33.1667	5.48371	33.1667	6.43744	33.25	11.764			33.1667	4.54255	33.1667	4.37525	33.1667	10.465	34.5	7.98654			33.75	4.42134	33.6667	11.9289	33.1667	7.73378	33.1667	10.085	54.25	3.64663	33.1667	4.991	33.1667	11.1941	33.1667	15.2833
33.25	5.22809	33.25	18.8255	33.25	10.6153	37.25	11.7113	36.6667	6.68085			33.25	8.18267	34.0833	4.54917	33.25	5.48451	33.25	6.416	33.3333	11.8063			33.25	4.50915	33.25	4.36382	33.25	10.4612	34.5833	8.0363			33.8333	4.43223	33.75	11.8921	33.25	7.72601	33.25	10.0343	54.3333	3.66839	33.25	5.0005	33.25	11.1903	33.25	15.3122
33.3333	5.23269	33.3333	18.8278	33.3333	10.6572	37.3333	11.6992	36.75	6.6809			33.3333	8.2601	34.1667	4.50693	33.3333	5.53671	33.3333	6.43159	33.4167	11.8158			33.3333	4.49986	33.3333	4.33867	33.3333	10.4633	34.6667	8.13517			33.9167	4.4358	33.8333	11.9398	33.3333	7.79053	33.3333	10.0224	54.4167	3.64427	33.3333	4.96172	33.3333	11.2242	33.3333	15.3468
33.4167	5.21405	33.4167	18.832	33.4167	10.6183	37.4167	11.6764	36.8333	6.71014			33.4167	8.2025	34.25	4.51182	33.4167	5.59375	33.4167	6.41119	33.5	11.7893			33.4167	4.47684	33.4167	4.2827	33.4167	10.465	34.75	8.21071			34	4.43033	33.9167	11.8363	33.4167	7.89993	33.4167	10.0637	54.5	3.62285	33.4167	4.95387	33.4167	11.2086	33.4167	15.3853
33.5	5.193	33.5	18.878	33.5	10.5881	37.5	11.6741	36.9167	6.69974			33.5	8.12467	34.3333	4.52827	33.5	5.61028	33.5	6.4248	33.5833	11.7955			33.5	4.47734	33.5	4.33411	33.5	10.4807	34.8333	8.2341			34.0833	4.40685	34	11.9154	33.5	7.9864	33.5	10.1107	54.5833	3.61608	33.5	4.97337	33.5	11.2254	33.5	15.3971
33.5833	5.18972	33.5833	18.9193	33.5833	10.5806	37.5833	11.7231	37	6.71062			33.5833	8.065	34.4167	4.56971	33.5833	5.6556	33.5833	6.42583	33.6667	11.8114			33.5833	4.45979	33.5833	4.39295	33.5833	10.5051	34.9167	8.22076			34.1667	4.4033	34.0833	11.9315	33.5833	8.01012	33.5833	10.0825	54.6667	3.62981	33.5833	4.98704	33.5833	11.2181	33.5833	15.4506
33.6667	5.20476	33.6667	18.9477	33.6667	10.5529	37.6667	11.8503	37.0833	6.71483			33.6667	8.11878	34.5	4.58026	33.6667	5.73825	33.6667	6.43185	33.75	11.8302			33.6667	4.45968	33.6667	4.44106	33.6667	10.511	35	8.16715			34.25	4.40307			33.6667	8.0602	33.6667	10.051	54.75	3.66655	33.6667	4.98018	33.6667	11.2105	33.6667	15.4799
33.75	5.22076	33.75	18.9543	33.75	10.5571	37.75	11.8655	37.1667	6.73945			33.75	8.25093	34.5833	4.553	33.75	5.73425	33.75	6.41652	33.8333	11.825			33.75	4.49012	33.75	4.43457	33.75	10.5202	35.0833	8.15159			34.3333	4.41263			33.75	8.05491	33.75	9.97678	54.8333	3.64782	33.75	4.98305	33.75	11.1974	33.75	15.5217
33.8333	5.2221	33.8333	18.9843	33.8333	10.4302	37.8333	11.8664	37.25	6.74768			33.8333	8.25898	34.6667	4.51384	33.8333	5.66898	33.8333	6.42314	33.9167	11.8136			33.8333	4.48763	33.8333	4.44297	33.8333	10.5183	35.1667	8.1229			34.4167	4.41716			33.8333	8.08712	33.8333	9.99169	54.9167	3.65146	33.8333	4.97628	33.8333	11.2446	33.8333	15.5274
33.9167	5.21296	33.9167	19.0183	33.9167	10.4402	37.9167	11.9308	37.3333	6.73366			33.9167	8.26703	34.75	4.47801	33.9167	5.58299	33.9167	6.43119	34	11.8248			33.9167	4.45184	33.9167	4.43687	33.9167	10.5294	35.25	8.12223			34.5	4.42154			33.9167	8.05744	33.9167	9.99208	55	3.64269	33.9167	4.9923	33.9167	11.2805	33.9167	15.5127
34	5.1839	34	19.0529	34	10.4457			37.4167	6.74802			34	8.27508	34.8333	4.52588	34	5.58974	34	6.44914	34.0833	11.8003			34	4.41852	34	4.46998	34	10.5211	35.3333	8.12826			34.5833	4.42145			34	8.09242	34	10.0044	55.0833	3.6505	34	5.00986	34	11.3127	34	15.4908
34.0833	5.18728	34.0833	19.0571	34.0833	10.6123			37.5	6.78075			34.0833	8.23406	34.9167	4.54755	34.0833	5.57194	34.0833	6.43678	34.1667	11.8053			34.0833	4.36337	34.0833	4.41113	34.0833	10.5186	35.4167	8.10174			34.6667	4.40089			34.0833	8.10113	34.0833	10.0437	55.1667	3.6449	34.0833	5.02006	34.0833	11.2949	34.0833	15.4608
34.1667	5.19025	34.1667	19.0244	34.1667	10.6486			37.5833	6.8648			34.1667	8.17608	35	4.58491	34.1667	5.58087	34.1667	6.41433	34.25	11.8176			34.1667	4.41512	34.1667	4.37507	34.1667	10.4942	35.5	8.11564			34.75	4.39251			34.1667	8.15031	34.1667	10.021	55.25	3.64623	34.1667	4.98415	34.1667	11.2604	34.1667	15.4728
34.25	5.23635	34.25	19.0985	34.25	10.762			37.6667	6.93961			34.25	8.21335	35.0833	4.56013	34.25	5.63694	34.25	6.46169	34.3333	11.8745			34.25	4.39104	34.25	4.33324	34.25	10.5075	35.5833	8.13102			34.8333	4.40984			34.25	8.11742	34.25	10.042	55.3333	3.66538	34.25	4.93662	34.25	11.2537	34.25	15.4983
34.3333	5.23303	34.3333	19.057	34.3333	10.7543			37.75	7.0451			34.3333	8.2105	35.1667	4.57138	34.3333	5.68716	34.3333	6.45016	34.4167	11.8295			34.3333	4.45818	34.3333	4.41035	34.3333	10.4977	35.6667	8.17072			34.9167	4.43983			34.3333	8.13052	34.3333	10.0303	55.4167	3.65709	34.3333	4.90736	34.3333	11.2913	34.3333	15.5179
34.4167	5.22793	34.4167	19.0456	34.4167	10.7348			37.8333	7.06881			34.4167	8.2189	35.25	4.57569	34.4167	5.70754	34.4167	6.45658	34.5	11.8029			34.4167	4.50196	34.4167	4.42504	34.4167	10.5157	35.75	8.18574			35	4.43703			34.4167	8.08922	34.4167	10.0544	55.5	3.66163	34.4167	4.89831	34.4167	11.3301	34.4167	15.5511
34.5	5.20598	34.5	18.9195	34.5	10.7161			37.9167	7.07863			34.5	8.16939	35.3333	4.59218	34.5	5.73097	34.5	6.41968	34.5833	11.7838			34.5	4.55054	34.5	4.38954	34.5	10.4968	35.8333	8.15756			35.0833	4.41612			34.5	8.15731	34.5	10.0265	55.5833	3.65558	34.5	4.89259	34.5	11.3632	34.5	15.5479
34.5833	5.21258	34.5833	18.9152	34.5833	10.7428			38	7.06561			34.5833	8.19212	35.4167	4.61337	34.5833	5.73029	34.5833	6.43689	34.6667	11.8067			34.5833	4.529	34.5833	4.30319	34.5833	10.5061	35.9167	8.13422			35.1667	4.39521			34.5833	8.18863	34.5833	9.9801	55.6667	3.68121	34.5833	4.9311	34.5833	11.3737	34.5833	15.591
34.6667	5.21117	34.6667	18.9184	34.6667	10.7748			38.0833	7.09082			34.6667	8.17591	35.5	4.62895	34.6667	5.7514	34.6667	6.43397	34.75	11.8205			34.6667	4.53034	34.6667	4.31515	34.6667	10.5023	36	8.07136			35.25	4.38111			34.6667	8.18215	34.6667	9.9672	55.75	3.68626	34.6667	4.95802	34.6667	11.384	34.6667	15.6003
34.75	5.19659	34.75	18.9246	34.75	10.7885			38.1667	7.08821			34.75	8.24449	35.5833	4.61615	34.75	5.77255	34.75	6.42869	34.8333	11.8368			34.75	4.50351	34.75	4.32451	34.75	10.5081	36.0833	8.0863			35.3333	4.3742			34.75	8.15822	34.75	9.97767	55.8333	3.71832	34.75	4.9532	34.75	11.3834	34.75	15.6537
34.8333	5.20527	34.8333	18.9329	34.8333	10.7959			38.25	7.14288			34.8333	8.24572	35.6667	4.57238	34.8333	5.83973	34.8333	6.41242	34.9167	11.849			34.8333	4.60349	34.8333	4.32257	34.8333	10.5009	36.1667	8.0835			35.4167	4.37241			34.8333	8.12014	34.8333	9.98573	55.9167	3.71704	34.8333	5.02136	34.8333	11.4027	34.8333	15.7235
34.9167	5.2099	34.9167	18.9107	34.9167	10.7792			38.3333	7.18004			34.9167	8.42611	35.75	4.53965	34.9167	5.89219	34.9167	6.43374	35	11.8217			34.9167	4.61625	34.9167	4.2841	34.9167	10.5009	36.25	8.09582			35.5	4.38254			34.9167	8.21415	34.9167	9.98474	56	3.7255	34.9167	5.11615	34.9167	11.4278	34.9167	15.7752
35	5.20722	35	18.9061	35	10.7832			38.4167	7.23151			35	8.6065	35.8333	4.56959	35	5.95405	35	6.41303	35.0833	11.8358			35	4.55505	35	4.32839	35	10.5148	36.3333	8.07214			35.5833	4.36885			35	8.32138	35	10.0026	56.0833	3.69307	35	5.32838	35	11.426	35	15.8239
35.0833	5.17154	35.0833	18.8941	35.0833	10.7982			38.5	7.2514			35.0833	8.44247	35.9167	4.59456	35.0833	5.97037	35.0833	6.42574	35.1667	11.8171			35.0833	4.54402	35.0833	4.36109	35.0833	10.5103	36.4167	8.07647			35.6667	4.35762			35.0833	8.3509	35.0833	10.0245	56.1667	3.67793	35.0833	5.35041	35.0833	11.4341	35.0833	15.8295
35.1667	5.15993	35.1667	18.9147	35.1667	10.8424			38.5833	7.27976			35.1667	8.27843	36	4.59026	35.1667	6.00566	35.1667	6.40195	35.25	11.8227			35.1667	4.50583	35.1667	4.42231	35.1667	10.505	36.5	8.09914			35.75	4.36151			35.1667	8.3414	35.1667	10.0274	56.25	3.64362	35.1667	5.38937	35.1667	11.4243	35.1667	15.8588
35.25	5.15927	35.25	18.9236	35.25	10.8071			38.6667	7.32303			35.25	8.23735	36.0833	4.57695	35.25	5.92592	35.25	6.42089	35.3333	11.8163			35.25	4.59398	35.25	4.41783	35.25	10.5125	36.5833	8.09563			35.8333	4.36465			35.25	8.35377	35.25	10.0153	56.3333	3.64187	35.25	5.33598	35.25	11.4504	35.25	15.8344
35.3333	5.15892	35.3333	18.9458	35.3333	10.786			38.75	7.3308			35.3333	8.12062	36.1667	4.54877	35.3333	5.96579	35.3333	6.41792	35.4167	11.8217			35.3333	4.61437	35.3333	4.3876	35.3333	10.5154	36.6667	8.11977			35.9167	4.39712			35.3333	8.36318	35.3333	9.99682	56.4167	3.64972	35.3333	5.3081	35.3333	11.4559	35.3333	15.8756
35.4167	5.1702	35.4167	18.9816	35.4167	10.772			38.8333	7.30395			35.4167	8.21123	36.25	4.51862	35.4167	5.89668	35.4167	6.43457	35.5	11.8431			35.4167	4.67271	35.4167	4.40223	35.4167	10.5194	36.75	8.12432			36	4.39874			35.4167	8.40348	35.4167	10.01	56.5	3.66494	35.4167	5.32109	35.4167	11.4803	35.4167	15.8991
35.5	5.1779	35.5	19.0375	35.5	10.7514			38.9167	7.30879			35.5	8.23062	36.3333	4.51769	35.5	5.93532	35.5	6.41767	35.5833	11.8303			35.5	4.62203	35.5	4.39486	35.5	10.5343	36.8333	8.22433			36.0833	4.40416			35.5	8.41285	35.5	9.98909	56.5833	3.67398	35.5	5.36702	35.5	11.4708	35.5	15.9375
35.5833	5.1978	35.5833	19.0864	35.5833	10.7104			39	7.28909			35.5833	8.27812	36.4167	4.52805	35.5833	5.90356	35.5833	6.42517	35.6667	11.8691			35.5833	4.60416	35.5833	4.41701	35.5833	10.5617	36.9167	8.24617			36.1667	4.38879			35.5833	8.41198	35.5833	10.045	56.6667	3.69307	35.5833	5.39488	35.5833	11.4511	35.5833	15.9334
35.6667	5.19072	35.6667	19.1059	35.6667	10.7618			39.0833	7.36399			35.6667	8.32562	36.5	4.58477	35.6667	5.96457	35.6667	6.44007	35.75	11.894			35.6667	4.63674	35.6667	4.36649	35.6667	10.5703	37	8.23547			36.25	4.38966			35.6667	8.39952	35.6667	10.0647	56.75	3.69485	35.6667	5.36139	35.6667	11.4105	35.6667	15.9333
35.75	5.18659	35.75	19.1472	35.75	10.7606			39.1667	7.40193					36.5833	4.57186	35.75	5.95437	35.75	6.4486	35.8333	12.047			35.75	4.68253	35.75	4.39802	35.75	10.5486	37.0833	8.17294			36.3333	4.39211			35.75	8.38528	35.75	10.1624	56.8333	3.69611	35.75	5.33995	35.75	11.447	35.75	15.8994
35.8333	5.18339	35.8333	19.1887	35.8333	10.7947			39.25	7.44683					36.6667	4.57252	35.8333	5.99796	35.8333	6.46072	35.9167	12.1444			35.8333	4.69787	35.8333	4.40627	35.8333	10.5312	37.1667	8.19724			36.4167	4.37829			35.8333	8.37049	35.8333	10.0776	56.9167	3.68504	35.8333	5.34099	35.8333	11.4516	35.8333	15.908
35.9167	5.21334	35.9167	19.2838	35.9167	10.9303			39.3333	7.47217					36.75	4.5287	35.9167	6.032	35.9167	6.44167	36	12.2417			35.9167	4.63116	35.9167	4.49174	35.9167	10.5341	37.25	8.17824			36.5	4.38118			35.9167	8.37169	35.9167	10.0636	57	3.69934	35.9167	5.38394	35.9167	11.4648	35.9167	15.9578
36	5.22294	36	19.347	36	11.0351			39.4167	7.49577					36.8333	4.53207	36	6.04683	36	6.45688	36.0833	12.3361			36	4.68443	36	4.48684	36	10.5326	37.3333	8.14323			36.5833	4.40168			36	8.39918	36	10.0953	57.0833	3.69845	36	5.41276	36	11.4153	36	16.019
36.0833	5.22175	36.0833	19.3983	36.0833	11.0505			39.5	7.54016					36.9167	4.54022	36.0833	6.08404	36.0833	6.42831	36.1667	12.2146			36.0833	4.68033	36.0833	4.50301	36.0833	10.5529	37.4167	8.08708			36.6667	4.43894			36.0833	8.46781	36.0833	10.1002	57.1667	3.68858	36.0833	5.41517	36.0833	11.3924	36.0833	16.0621
36.1667	5.2003	36.1667	19.4149	36.1667	11.1092			39.5833	7.56001					37	4.55183	36.1667	6.09304	36.1667	6.41712	36.25	12.0931			36.1667	4.6839	36.1667	4.44503	36.1667	10.5343	37.5	8.09579			36.75	4.45138			36.1667	8.5425	36.1667	10.1109	57.25	3.68907	36.1667	5.39719	36.1667	11.4131	36.1667	16.1033
36.25	5.20536	36.25	19.3776	36.25	11.0777			39.6667	7.67779					37.0833	4.57323	36.25	6.16109	36.25	6.41354	36.3333	11.9715			36.25	4.62155	36.25	4.33626	36.25	10.5584	37.5833	8.17119			36.8333	4.44477			36.25	8.55517	36.25	10.071	57.3333	3.70286	36.25	5.3611	36.25	11.4089	36.25	16.1489
36.3333	5.21539	36.3333	19.2519	36.3333	11.0637			39.75	7.69736					37.1667	4.58986	36.3333	6.15899	36.3333	6.42795	36.4167	11.9127			36.3333	4.55775	36.3333	4.30357	36.3333	10.5613	37.6667	8.21047			36.9167	4.42795			36.3333	8.52585	36.3333	10.1275	57.4167	3.72517	36.3333	5.29494	36.3333	11.4035	36.3333	16.1744
36.4167	5.22426	36.4167	19.2073	36.4167	10.8618			39.8333	7.72862					37.25	4.60268	36.4167	6.18683	36.4167	6.44394	36.5	11.8779			36.4167	4.57902	36.4167	4.33599	36.4167	10.5967	37.75	8.25019			37	4.43098			36.4167	8.51108	36.4167	10.1301	57.5	3.72742	36.4167	5.16715	36.4167	11.3784	36.4167	16.1539
36.5	5.22915	36.5	19.1872	36.5	10.8441			39.9167	7.68304					37.3333	4.59336	36.5	6.20957	36.5	6.44579	36.5833	11.8753			36.5	4.53861	36.5	4.40066	36.5	10.6062	37.8333	8.25417			37.0833	4.43154			36.5	8.49463	36.5	10.1134	57.5833	3.71609	36.5	5.06387	36.5	11.3957	36.5	16.1413
36.5833	5.21416	36.5833	19.2088	36.5833	10.7699			40	7.70731					37.4167	4.63006	36.5833	6.24277	36.5833	6.44663	36.6667	11.9657			36.5833	4.57988	36.5833	4.39503	36.5833	10.5951	37.9167	8.29337			37.1667	4.43279			36.5833	8.51515	36.5833	10.0531	57.6667	3.68421	36.5833	5.02354	36.5833	11.4256	36.5833	16.1481
36.6667	5.20521	36.6667	19.2429	36.6667	10.8379			40.0833	7.75918					37.5	4.57568	36.6667	6.24231	36.6667	6.44672	36.75	12.0561			36.6667	4.57775	36.6667	4.38431	36.6667	10.6016	38	8.31006			37.25	4.43369			36.6667	8.49211	36.6667	10.058	57.75	3.67195	36.6667	5.02539	36.6667	11.4471	36.6667	16.1747
36.75	5.19514	36.75	19.3308	36.75	10.7626			40.1667	7.77523					37.5833	4.6006	36.75	6.32801	36.75	6.4543	36.8333	12.087			36.75	4.63939	36.75	4.38153	36.75	10.6011	38.0833	8.32642			37.3333	4.4234			36.75	8.48778	36.75	10.0632	57.8333	3.67218	36.75	5.04018	36.75	11.4419	36.75	16.1821
36.8333	5.21319	36.8333	19.3868	36.8333	10.8494			40.25	7.76242					37.6667	4.60015	36.8333	6.33733	36.8333	6.45259	36.9167	12.1317			36.8333	4.60937	36.8333	4.42841	36.8333	10.5927	38.1667	8.3237			37.4167	4.42401			36.8333	8.45876	36.8333	10.0511	57.9167	3.7035	36.8333	5.05865	36.8333	11.4467	36.8333	16.1777
36.9167	5.2188	36.9167	19.4118	36.9167	10.8116			40.3333	7.71155					37.75	4.61545	36.9167	6.38375	36.9167	6.46317	37	12.1359			36.9167	4.57183	36.9167	4.4069	36.9167	10.5578	38.25	8.33086			37.5	4.42735			36.9167	8.44313	36.9167	10.0397	58	3.69037	36.9167	5.06413	36.9167	11.4376	36.9167	16.1823
37	5.21869	37	19.4353	37	10.9083			40.4167	7.69771					37.8333	4.62666	37	6.35871	37	6.45361	37.0833	12.1425			37	4.45469	37	4.37565	37	10.5461	38.3333	8.33054			37.5833	4.441			37	8.46589	37	10.0888	58.0833	3.70509	37	5.09209	37	11.4417	37	16.2222
37.0833	5.21417	37.0833	19.4437	37.0833	10.8939			40.5	7.72643					37.9167	4.61366	37.0833	6.40811	37.0833	6.48319	37.1667	12.1893			37.0833	4.39905	37.0833	4.33228	37.0833	10.5622	38.4167	8.36547			37.6667	4.47509			37.0833	8.49032	37.0833	10.118	58.1667	3.69232	37.0833	5.10376	37.0833	11.4374	37.0833	16.2795
37.1667	5.20874	37.1667	19.4692	37.1667	10.8975			40.5833	7.77487					38	4.6498	37.1667	6.39551	37.1667	6.47978	37.25	12.1241			37.1667	4.33761	37.1667	4.33134	37.1667	10.562	38.5	8.34788			37.75	4.49219			37.1667	8.5021	37.1667	10.2008	58.25	3.7117	37.1667	5.06508	37.1667	11.4269	37.1667	16.2801
37.25	5.2187	37.25	19.4533	37.25	10.8777			40.6667	7.78733					38.0833	4.66609	37.25	6.45417	37.25	6.47551	37.3333	12.019			37.25	4.39292	37.25	4.29844	37.25	10.5383	38.5833	8.32465			37.8333	4.54626			37.25	8.49772	37.25	10.174	58.3333	3.70506	37.25	5.0037	37.25	11.4536	37.25	16.2683
37.3333	5.2274	37.3333	19.464	37.3333	10.8331			40.75	7.79653					38.1667	4.64459	37.3333	6.46751	37.3333	6.45115	37.4167	12.1326			37.3333	4.42236	37.3333	4.31	37.3333	10.5516	38.6667	8.27076			37.9167	4.54536			37.3333	8.54922	37.3333	10.2202	58.4167	3.68837	37.3333	5.01314	37.3333	11.4551	37.3333	16.2747
37.4167	5.2417	37.4167	19.4521	37.4167	10.7822			40.8333	7.8095					38.25	4.62833	37.4167	6.47444	37.4167	6.46322	37.5	12.2462			37.4167	4.41107	37.4167	4.29337	37.4167	10.5572	38.75	8.30543			38	4.51134			37.4167	8.60929	37.4167	10.1792	58.5	3.67267	37.4167	5.07588	37.4167	11.4656	37.4167	16.2958
37.5	5.24743	37.5	19.4671	37.5	10.8127			40.9167	7.77382					38.3333	4.5931	37.5	6.49888	37.5	6.48085	37.5833	12.3598			37.5	4.44207	37.5	4.36938	37.5	10.6005	38.8333	8.42185			38.0833	4.49228			37.5	8.63776	37.5	10.1974	58.5833	3.65867	37.5	5.14496	37.5	11.4543	37.5	16.3317
37.5833	5.25324	37.5833	19.4641	37.5833	10.8284			41	7.80571					38.4167	4.61991	37.5833	6.50825	37.5833	6.48468	37.6667	12.3331			37.5833	4.38709	37.5833	4.3582	37.5833	10.5929	38.9167	8.45962			38.1667	4.47237			37.5833	8.61026	37.5833	10.2265	58.6667	3.68069	37.5833	5.1484	37.5833	11.49	37.5833	16.3306
37.6667	5.26405	37.6667	19.4497	37.6667	11.0699			41.0833	7.76906					38.5	4.64092	37.6667	6.57582	37.6667	6.48597	37.75	12.3428			37.6667	4.45505	37.6667	4.36582	37.6667	10.5869	39	8.48052			38.25	4.47728			37.6667	8.59997	37.6667	10.2478	58.75	3.70526	37.6667	5.1222	37.6667	11.5269	37.6667	16.3524
37.75	5.26576	37.75	19.4847	37.75	11.1682			41.1667	7.88397					38.5833	4.62377	37.75	6.56709	37.75	6.47865	37.8333	12.28			37.75	4.42903	37.75	4.35399	37.75	10.5877	39.0833	8.48691			38.3333	4.45793			37.75	8.65623	37.75	10.2827	58.8333	3.72149	37.75	5.08218	37.75	11.5223	37.75	16.3526
37.8333	5.27255	37.8333	19.5658	37.8333	11.1882			41.25	7.99065					38.6667	4.64931	37.8333	6.60487	37.8333	6.48921	37.9167	12.289			37.8333	4.50386	37.8333	4.33127	37.8333	10.5932	39.1667	8.51303			38.4167	4.44492			37.8333	8.64934	37.8333	10.3004	58.9167	3.71826	37.8333	5.08428	37.8333	11.5084	37.8333	16.356
37.9167	5.26664	37.9167	19.6533	37.9167	11.1868			41.3333	8.05471					38.75	4.64993	37.9167	6.91594	37.9167	6.47324	38	12.2691			37.9167	4.4705	37.9167	4.3252	37.9167	10.6321	39.25	8.50407			38.5	4.47031			37.9167	8.646	37.9167	10.2967	59	3.733	37.9167	5.11145	37.9167	11.4913	37.9167	16.3348
38	5.26434	38	19.6766	38	11.2219			41.4167	8.16505					38.8333	4.66129	38	7.22701	38	6.49238					38	4.50368	38	4.32023	38	10.6025	39.3333	8.50494			38.5833	4.44466			38	8.62157	38	10.3447	59.0833	3.7281	38	5.16562	38	11.5121	38	16.3156
38.0833	5.23416	38.0833	19.6859					41.5	8.0141					38.9167	4.64646	38.0833	7.11596	38.0833	6.49678					38.0833	4.52059	38.0833	4.34387	38.0833	10.6084	39.4167	8.44499			38.6667	4.46254			38.0833	8.64874	38.0833	10.3559	59.1667	3.72694	38.0833	5.20533	38.0833	11.5208	38.0833	16.3323
38.1667	5.21793	38.1667	19.7012					41.5833	8.09066					39	4.64034	38.1667	6.82939	38.1667	6.52494					38.1667	4.62205	38.1667	4.39617	38.1667	10.5955	39.5	8.43427			38.75	4.44206			38.1667	8.66509	38.1667	10.3193	59.25	3.68887	38.1667	5.24445	38.1667	11.4964	38.1667	16.3628
38.25	5.20846	38.25	19.7441					41.6667	8.08824					39.0833	4.67779	38.25	6.63891	38.25	6.52174					38.25	4.71379	38.25	4.36412	38.25	10.5876	39.5833	8.37173			38.8333	4.47739			38.25	8.67742	38.25	10.2843	59.3333	3.70372	38.25	5.23004	38.25	11.4746	38.25	16.4064
38.3333	5.22933	38.3333	19.7621					41.75	8.07677					39.1667	4.67893	38.3333	6.5612	38.3333	6.52334					38.3333	4.80283	38.3333	4.36309	38.3333	10.5713	39.6667	8.42999			38.9167	4.50434			38.3333	8.69656	38.3333	10.2273	59.4167	3.69554	38.3333	5.16304	38.3333	11.5023	38.3333	16.433
38.4167	5.23546	38.4167	19.783					41.8333	8.052					39.25	4.67095	38.4167	6.59869	38.4167	6.51863					38.4167	4.80484	38.4167	4.31665	38.4167	10.5614	39.75	8.47511			39	4.50054			38.4167	8.72165	38.4167	10.2984	59.5	3.72609	38.4167	5.11633	38.4167	11.5674	38.4167	16.4166
38.5	5.2306	38.5	19.796					41.9167	8.0164					39.3333	4.63263	38.5	6.6379	38.5	6.53798					38.5	4.79587	38.5	4.33646	38.5	10.5881	39.8333	8.48267			39.0833	4.5257			38.5	8.74857	38.5	10.3067	59.5833	3.70433	38.5	5.12604	38.5	11.6136	38.5	16.3976
38.5833	5.22189	38.5833	19.8239					42	8.01927					39.4167	4.63164	38.5833	6.70913	38.5833	6.55003					38.5833	4.75565	38.5833	4.32136	38.5833	10.6167	39.9167	8.46717			39.1667	4.50018			38.5833	8.78846	38.5833	10.3443	59.6667	3.70414	38.5833	5.15144	38.5833	11.635	38.5833	16.352
38.6667	5.22835	38.6667	19.8271					42.0833	8.00622					39.5	4.62188	38.6667	6.73006	38.6667	6.55786					38.6667	4.77423	38.6667	4.32713	38.6667	10.6298	40	8.46032			39.25	4.52247			38.6667	8.82316	38.6667	10.3435	59.75	3.68031	38.6667	5.20335	38.6667	11.6206	38.6667	16.3948
38.75	5.23999	38.75	19.7971					42.1667	7.87553					39.5833	4.63498	38.75	6.7183	38.75	6.54684					38.75	4.79535	38.75	4.35821	38.75	10.6265	40.0833	8.46339			39.3333	4.51326			38.75	8.86615	38.75	10.347	59.8333	3.68321	38.75	5.18043	38.75	11.6627	38.75	16.3685
38.8333	5.25025	38.8333	19.7893					42.25	7.84176					39.6667	4.63842	38.8333	6.72618	38.8333	6.54261					38.8333	4.8187	38.8333	4.38385	38.8333	10.6502	40.1667	8.42531			39.4167	4.53923			38.8333	8.87848	38.8333	10.3549	59.9167	3.68799	38.8333	5.21976	38.8333	11.6505	38.8333	16.3279
38.9167	5.24079	38.9167	19.7954					42.3333	7.88562					39.75	4.65417	38.9167	6.78097	38.9167	6.53107					38.9167	4.814	38.9167	4.39832	38.9167	10.6613	40.25	8.42751			39.5	4.54362			38.9167	8.94432	38.9167	10.3969	60	3.68084	38.9167	5.18236	38.9167	11.6519	38.9167	16.2919
39	5.22448	39	19.8476					42.4167	7.91128					39.8333	4.64668	39	6.81459	39	6.53558					39	4.80459	39	4.30239	39	10.676	40.3333	8.4049			39.5833	4.56899			39	8.94918	39	10.349			39	5.18949	39	11.6322	39	16.291
39.0833	5.21272	39.0833	19.8669					42.5	7.92577					39.9167	4.65461	39.0833	6.81409	39.0833	6.52389					39.0833	4.77609	39.0833	4.27381	39.0833	10.6355	40.4167	8.44632			39.6667	4.57039			39.0833	8.90663	39.0833	10.3887			39.0833	5.16491	39.0833	11.6291	39.0833	16.3105
39.1667	5.21671	39.1667	19.8987					42.5833	7.936					40	4.67191	39.1667	6.7993	39.1667	6.50759					39.1667	4.76871	39.1667	4.24877	39.1667	10.6236	40.5	8.44632			39.75	4.58645			39.1667	8.81683	39.1667	10.3286			39.1667	5.17441	39.1667	11.6257	39.1667	16.3315
39.25	5.22923	39.25	19.9317					42.6667	8.04713					40.0833	4.69697	39.25	6.84753	39.25	6.4918					39.25	4.7758	39.25	4.37979	39.25	10.5939	40.5833	8.47762			39.8333	4.55329			39.25	8.80957	39.25	10.3561			39.25	5.15266	39.25	11.621	39.25	16.3629
39.3333	5.22416	39.3333	19.9579					42.75	8.08321					40.1667	4.69805	39.3333	6.84668	39.3333	6.49799					39.3333	4.7752	39.3333	4.37467	39.3333	10.5821	40.6667	8.49716			39.9167	4.57408			39.3333	8.86619	39.3333	10.3301			39.3333	5.12852	39.3333	11.6559	39.3333	16.3936
39.4167	5.22163	39.4167	19.9825					42.8333	8.00557					40.25	4.71909	39.4167	6.86947	39.4167	6.48705					39.4167	4.79087	39.4167	4.39766	39.4167	10.611	40.75	8.51745			40	4.57775			39.4167	8.90693	39.4167	10.2824			39.4167	5.13753	39.4167	11.6769	39.4167	16.4247
39.5	5.22662	39.5	20.044					42.9167	7.91757					40.3333	4.72136	39.5	6.89132	39.5	6.48122					39.5	4.77987	39.5	4.34891	39.5	10.6467	40.8333	8.50225			40.0833	4.66973			39.5	8.89237	39.5	10.277			39.5	5.13607	39.5	11.6992	39.5	16.4519
39.5833	5.23272	39.5833	20.1153					43	7.96605					40.4167	4.72879	39.5833	6.94231	39.5833	6.471					39.5833	4.80526	39.5833	4.39895	39.5833	10.6614	40.9167	8.47708			40.1667	4.71166			39.5833	8.89806	39.5833	10.2575			39.5833	5.18709	39.5833	11.6903	39.5833	16.5011
39.6667	5.24725	39.6667	20.1864					43.0833	8.01431					40.5	4.70318	39.6667	6.98743	39.6667	6.49668					39.6667	4.78947	39.6667	4.37685	39.6667	10.6412	41	8.464			40.25	4.72532			39.6667	8.90614	39.6667	10.2495			39.6667	5.2114	39.6667	11.6668	39.6667	16.5693
39.75	5.2466	39.75	20.2526					43.1667	8.04067					40.5833	4.7128	39.75	6.99629	39.75	6.50625					39.75	4.79107	39.75	4.36707	39.75	10.666	41.0833	8.4981			40.3333	4.6546			39.75	8.94825	39.75	10.2347			39.75	5.25975	39.75	11.6478	39.75	16.6038
39.8333	5.24829	39.8333	20.3108					43.25	7.98772					40.6667	4.72406	39.8333	7.05121	39.8333	6.53827					39.8333	4.79889	39.8333	4.33316	39.8333	10.6866	41.1667	8.49692			40.4167	4.60091			39.8333	8.94387	39.8333	10.2171			39.8333	5.23683	39.8333	11.6383	39.8333	16.6215
39.9167	5.22861	39.9167	20.3395					43.3333	8.06237					40.75	4.7014	39.9167	7.08811	39.9167	6.53623					39.9167	4.81513	39.9167	4.33856	39.9167	10.7141	41.25	8.50463			40.5	4.51873			39.9167	8.94626	39.9167	10.2839			39.9167	5.19872	39.9167	11.6594	39.9167	16.5867
40	5.22339	40	20.3506					43.4167	8.07395					40.8333	4.70018	40	7.07901	40	6.5241					40	4.8124	40	4.35366	40	10.6845	41.3333	8.49864			40.5833	4.52486			40	8.96446	40	10.3755			40	5.21849	40	11.6825	40	16.6323
40.0833	5.2178	40.0833	20.4019					43.5	8.1179					40.9167	4.67713	40.0833	7.17313	40.0833	6.5042					40.0833	4.79338	40.0833	4.32299	40.0833	10.6673	41.4167	8.49189			40.6667	4.49925			40.0833	8.98974	40.0833	10.3794			40.0833	5.24245	40.0833	11.6731	40.0833	16.692
40.1667	5.22335	40.1667	20.4335					43.5833	8.12766					41	4.72895	40.1667	7.13735	40.1667	6.48544					40.1667	4.80953	40.1667	4.3257	40.1667	10.6466	41.5	8.44567			40.75	4.52259			40.1667	8.9602	40.1667	10.4233			40.1667	5.2807	40.1667	11.6453	40.1667	16.7362
40.25	5.22441	40.25	20.4476					43.6667	8.22838					41.0833	4.73251	40.25	7.08678	40.25	6.49962					40.25	4.83427	40.25	4.3203	40.25	10.6484	41.5833	8.41037			40.8333	4.50537			40.25	8.92173	40.25	10.3693			40.25	5.26452	40.25	11.5995	40.25	16.7482
40.3333	5.23459	40.3333	20.4361					43.75	8.31569					41.1667	4.73002	40.3333	6.98515	40.3333	6.49317					40.3333	4.84281	40.3333	4.35596	40.3333	10.6499	41.6667	8.37157			40.9167	4.49068			40.3333	8.88791	40.3333	10.4325			40.3333	5.2578	40.3333	11.6241	40.3333	16.7179
40.4167	5.23804	40.4167	20.4883					43.8333	8.3336					41.25	4.70657	40.4167	7.04398	40.4167	6.50795					40.4167	4.84913	40.4167	4.33494	40.4167	10.6626	41.75	8.37297			41	4.50268			40.4167	8.90587	40.4167	10.4852			40.4167	5.28113	40.4167	11.6475	40.4167	16.7383
40.5	5.22791	40.5	20.5637					43.9167	8.34745					41.3333	4.71056	40.5	7.20707	40.5	6.52496					40.5	4.84965	40.5	4.31467	40.5	10.6735	41.8333	8.40767			41.0833	4.53242			40.5	8.94938	40.5	10.6259			40.5	5.29792	40.5	11.6946	40.5	16.7562
40.5833	5.21128	40.5833	20.6064					44	8.31333					41.4167	4.71388	40.5833	7.2596	40.5833	6.54135					40.5833	4.8634	40.5833	4.33937	40.5833	10.6732	41.9167	8.41975			41.1667	4.57053			40.5833	9.01439	40.5833	10.7017			40.5833	5.31121	40.5833	11.7005	40.5833	16.7995
40.6667	5.2068	40.6667	20.6334					44.0833	8.28803					41.5	4.71471	40.6667	7.23011	40.6667	6.57149					40.6667	4.85592	40.6667	4.33433	40.6667	10.6663	42	8.41622			41.25	4.59973			40.6667	9.06803	40.6667	10.6663			40.6667	5.29964	40.6667	11.7115	40.6667	16.8509
40.75	5.22138	40.75	20.6938					44.1667	8.22369					41.5833	4.72894	40.75	7.22093	40.75	6.56112					40.75	4.84051	40.75	4.33264	40.75	10.6812	42.0833	8.41699			41.3333	4.57046			40.75	9.15628	40.75	10.6267			40.75	5.30494	40.75	11.7041	40.75	16.8683
40.8333	5.23565	40.8333	20.7893					44.25	8.2661					41.6667	4.75019	40.8333	7.26315	40.8333	6.5561					40.8333	4.8171	40.8333	4.34282	40.8333	10.6914	42.1667	8.4603			41.4167	4.56273			40.8333	9.14088	40.8333	10.5928			40.8333	5.31981	40.8333	11.7103	40.8333	16.8912
40.9167	5.2458	40.9167	20.8219					44.3333	8.27796					41.75	4.76405	40.9167	7.2479	40.9167	6.53454					40.9167	4.81815	40.9167	4.33871	40.9167	10.6984	42.25	8.45119			41.5	4.54995			40.9167	9.06113	40.9167	10.6008			40.9167	5.32867	40.9167	11.7077	40.9167	16.8893
41	5.23579	41	20.8288					44.4167	8.28807					41.8333	4.75742	41	7.24661	41	6.53883					41	4.82749	41	4.34332	41	10.7022	42.3333	8.44943			41.5833	4.5643			41	9.00578	41	10.5788			41	5.32499	41	11.7175	41	16.887
41.0833	5.2297	41.0833	20.8046					44.5	8.24039					41.9167	4.77042	41.0833	7.23787	41.0833	6.53753					41.0833	4.82503	41.0833	4.3598	41.0833	10.7086	42.4167	8.41954			41.6667	4.56803			41.0833	8.94433	41.0833	10.4873			41.0833	5.35103	41.0833	11.7206	41.0833	16.892
41.1667	5.2208	41.1667	20.8223					44.5833	8.2095					42	4.78839	41.1667	7.28711	41.1667	6.54061					41.1667	4.79031	41.1667	4.38336	41.1667	10.7072	42.5	8.47245			41.75	4.60941			41.1667	8.9903	41.1667	10.3844			41.1667	5.34025	41.1667	11.708	41.1667	16.9041
41.25	5.2411	41.25	20.85					44.6667	8.17761					42.0833	4.81673	41.25	7.31459	41.25	6.54388					41.25	4.78244	41.25	4.3805	41.25	10.676	42.5833	8.49493			41.8333	4.64594			41.25	8.96266	41.25	10.4875			41.25	5.33774	41.25	11.6959	41.25	16.8927
41.3333	5.25292	41.3333	20.8822					44.75	8.18669					42.1667	4.81733	41.3333	7.33722	41.3333	6.5631					41.3333	4.76251	41.3333	4.31982	41.3333	10.68	42.6667	8.49489			41.9167	4.62383			41.3333	8.9931	41.3333	10.5349			41.3333	5.33831	41.3333	11.7123	41.3333	16.8869
41.4167	5.25874	41.4167	20.8895					44.8333	8.15933					42.25	4.79665	41.4167	7.3592	41.4167	6.58504					41.4167	4.78819	41.4167	4.31399	41.4167	10.6931	42.75	8.47034			42	4.58596			41.4167	8.96932	41.4167	10.5642			41.4167	5.37312	41.4167	11.7229	41.4167	16.8556
41.5	5.25346	41.5	20.8537					44.9167	8.15611					42.3333	4.78455	41.5	7.40045	41.5	6.59628					41.5	4.79156	41.5	4.31889	41.5	10.7179	42.8333	8.43074			42.0833	4.54737			41.5	9.04274	41.5	10.4593			41.5	5.4061	41.5	11.7354	41.5	16.8593
41.5833	5.23674	41.5833	20.8299					45	8.19073					42.4167	4.78231	41.5833	7.46825	41.5833	6.59126					41.5833	4.7872	41.5833	4.32436	41.5833	10.7105	42.9167	8.43925			42.1667	4.58873			41.5833	9.02918	41.5833	10.387			41.5833	5.39787	41.5833	11.6988	41.5833	16.836
41.6667	5.24209	41.6667	20.835					45.0833	8.20322					42.5	4.79608	41.6667	7.59599	41.6667	6.56016					41.6667	4.77512	41.6667	4.29609	41.6667	10.7523	43	8.46924			42.25	4.56717			41.6667	9.07688	41.6667	10.282			41.6667	5.39148	41.6667	11.7133	41.6667	16.8558
41.75	5.24493	41.75	20.8767					45.1667	8.28822					42.5833	4.80904	41.75	7.67957	41.75	6.57171					41.75	4.78598	41.75	4.32211	41.75	10.7717	43.0833	8.49685			42.3333	4.58904			41.75	9.08064	41.75	10.2425			41.75	5.36077	41.75	11.7051	41.75	16.8583
41.8333	5.25138	41.8333	20.915					45.25	8.27083					42.6667	4.79967	41.8333	7.68452	41.8333	6.58417					41.8333	4.85488	41.8333	4.34124	41.8333	10.7832	43.1667	8.52284			42.4167	4.51326			41.8333	9.22213	41.8333	10.3163			41.8333	5.34181	41.8333	11.7566	41.8333	16.8958
41.9167	5.25106	41.9167	20.9257					45.3333	8.21011					42.75	4.77753	41.9167	7.64518	41.9167	6.5933					41.9167	4.84322	41.9167	4.35628	41.9167	10.7541	43.25	8.49516			42.5	4.52655			41.9167	9.33707	41.9167	10.4349			41.9167	5.32576	41.9167	11.7539	41.9167	16.9423
42	5.24525	42	20.9104					45.4167	8.18257					42.8333	4.75798	42	7.66315	42	6.59103					42	4.83278	42	4.36154	42	10.7234	43.3333	8.46101			42.5833	4.51217			42	9.41084	42	10.4805			42	5.3155	42	11.7258	42	17.0186
42.0833	5.25504	42.0833	20.8954					45.5	8.18466					42.9167	4.76428	42.0833	7.72817	42.0833	6.55933					42.0833	4.84424	42.0833	4.35442	42.0833	10.7126	43.4167	8.41798			42.6667	4.59135			42.0833	9.39475	42.0833	10.4618			42.0833	5.33382	42.0833	11.6743	42.0833	17.0537
42.1667	5.24753	42.1667	20.8911					45.5833	8.22431					43	4.77722	42.1667	7.73376	42.1667	6.56333					42.1667	4.86568	42.1667	4.37842	42.1667	10.7329	43.5	8.42531			42.75	4.61621			42.1667	9.40419	42.1667	10.4544			42.1667	5.37153	42.1667	11.6469	42.1667	17.0604
42.25	5.24357	42.25	20.9327					45.6667	8.26051					43.0833	4.76819	42.25	7.78304	42.25	6.56225					42.25	4.88185	42.25	4.38654	42.25	10.7433	43.5833	8.46318			42.8333	4.67363			42.25	9.40004	42.25	10.4626			42.25	5.39706	42.25	11.6589	42.25	17.0564
42.3333	5.23182	42.3333	20.9631					45.75	8.28478					43.1667	4.75857	42.3333	7.84936	42.3333	6.59909					42.3333	4.86915	42.3333	4.3892	42.3333	10.751	43.6667	8.46539			42.9167	4.7794			42.3333	9.43627	42.3333	10.4866			42.3333	5.4104	42.3333	11.6839	42.3333	17.0841
42.4167	5.23671	42.4167	20.9786					45.8333	8.29262					43.25	4.74609	42.4167	7.94458	42.4167	6.59336					42.4167	4.86038	42.4167	4.37556	42.4167	10.7413	43.75	8.48908			43	4.81912			42.4167	9.42143	42.4167	10.4253			42.4167	5.40438	42.4167	11.6868	42.4167	17.162
42.5	5.25019	42.5	20.9681					45.9167	8.30896					43.3333	4.74331	42.5	7.95084	42.5	6.60127					42.5	4.85133	42.5	4.31898	42.5	10.7537	43.8333	8.48167			43.0833	4.76561			42.5	9.40171	42.5	10.4314			42.5	5.41733	42.5	11.6946	42.5	17.1954
42.5833	5.27086	42.5833	20.9738					46	8.26414					43.4167	4.73175	42.5833	7.94725	42.5833	6.60309					42.5833	4.82961	42.5833	4.37082	42.5833	10.7393	43.9167	8.44533			43.1667	4.66795			42.5833	9.40399	42.5833	10.3597			42.5833	5.41964	42.5833	11.7057	42.5833	17.2361
42.6667	5.28186	42.6667	20.9893					46.0833	8.32879					43.5	4.70264	42.6667	7.9606	42.6667	6.61825					42.6667	4.83604	42.6667	4.43119	42.6667	10.7355	44	8.43916			43.25	4.65481			42.6667	9.44322	42.6667	10.4393			42.6667	5.42681	42.6667	11.7032	42.6667	17.1848
42.75	5.28329	42.75	21.0195					46.1667	8.34151					43.5833	4.71834	42.75	8.01551	42.75	6.59701					42.75	4.83411	42.75	4.45416	42.75	10.7289	44.0833	8.45007			43.3333	4.74445			42.75	9.4613	42.75	10.4527			42.75	5.42891	42.75	11.7124	42.75	17.1794
42.8333	5.27009	42.8333	21.0245					46.25	8.34408					43.6667	4.70972	42.8333	8.05147	42.8333	6.59051					42.8333	4.86971	42.8333	4.37241	42.8333	10.7659	44.1667	8.53727			43.4167	4.68037			42.8333	9.48943	42.8333	10.4955			42.8333	5.4409	42.8333	11.6787	42.8333	17.1704
42.9167	5.2571	42.9167	21.0306					46.3333	8.31259					43.75	4.73355	42.9167	8.07793	42.9167	6.57824					42.9167	4.88034	42.9167	4.30914	42.9167	10.7664	44.25	8.50492			43.5	4.75716			42.9167	9.45789	42.9167	10.3712			42.9167	5.46836	42.9167	11.6713	42.9167	17.1779
43	5.25426	43	20.987					46.4167	8.27388					43.8333	4.72265	43	8.06691	43	6.58382					43	4.88564	43	4.34577	43	10.788	44.3333	8.48589			43.5833	4.75223			43	9.53143	43	10.3804			43	5.46847	43	11.6501	43	17.1718
43.0833	5.23875	43.0833	20.9826					46.5	8.24728					43.9167	4.7358	43.0833	8.11839	43.0833	6.56764					43.0833	4.87744	43.0833	4.36763	43.0833	10.7663	44.4167	8.46907			43.6667	5.03914			43.0833	9.48928	43.0833	10.3865			43.0833	5.48981	43.0833	11.652	43.0833	17.1509
43.1667	5.23981	43.1667	20.9576					46.5833	8.33591					44	4.75955	43.1667	8.16939	43.1667	6.57741					43.1667	4.87427	43.1667	4.38032	43.1667	10.7695	44.5	8.50233			43.75	4.90684			43.1667	9.534	43.1667	10.4947			43.1667	5.44752	43.1667	11.6612	43.1667	17.1736
43.25	5.23669	43.25	21.0014					46.6667	8.26531					44.0833	4.77319	43.25	8.21937	43.25	6.57811					43.25	4.88569	43.25	4.35951	43.25	10.7465	44.5833	8.50565			43.8333	5.10101			43.25	9.50448	43.25	10.5044			43.25	5.43048	43.25	11.649	43.25	17.212
43.3333	5.24765	43.3333	21.0209					46.75	8.29092					44.1667	4.78886	43.3333	8.29042	43.3333	6.59527					43.3333	4.89029	43.3333	4.35456	43.3333	10.7566	44.6667	8.48658			43.9167	5.05063			43.3333	9.51489	43.3333	10.5305			43.3333	5.40686	43.3333	11.6633	43.3333	17.2545
43.4167	5.24005	43.4167	21.022					46.8333	8.24855					44.25	4.80518	43.4167	8.31305	43.4167	6.59271					43.4167	4.90518	43.4167	4.33705	43.4167	10.7749	44.75	8.4749			44	4.91136			43.4167	9.48311	43.4167	10.5422			43.4167	5.43421	43.4167	11.6504	43.4167	17.2713
43.5	5.2403	43.5	20.9912					46.9167	8.26338					44.3333	4.80717	43.5	8.37818	43.5	6.59953					43.5	4.88698	43.5	4.35489	43.5	10.7887	44.8333	8.46905			44.0833	4.77209			43.5	9.45053	43.5	10.5043			43.5	5.46297	43.5	11.6899	43.5	17.2515
43.5833	5.25051	43.5833	20.9806					47	8.30073					44.4167	4.79429	43.5833	8.30496	43.5833	6.59279					43.5833	4.8847	43.5833	4.35729	43.5833	10.7934	44.9167	8.49034			44.1667	4.7107			43.5833	9.42128	43.5833	10.5162			43.5833	5.45746	43.5833	11.6904	43.5833	17.2076
43.6667	5.2587	43.6667	21.0009					47.0833	8.34836					44.5	4.75416	43.6667	8.27728	43.6667	6.60384					43.6667	4.8893	43.6667	4.41597	43.6667	10.7836	45	8.56299			44.25	4.70792			43.6667	9.4159	43.6667	10.5376			43.6667	5.43022	43.6667	11.6997	43.6667	17.2274
43.75	5.26277	43.75	21.008					47.1667	8.36621					44.5833	4.77542	43.75	8.30163	43.75	6.62239					43.75	4.89668	43.75	4.40385	43.75	10.7695	45.0833	8.60976			44.3333	4.73079			43.75	9.42703	43.75	10.5135			43.75	5.46443	43.75	11.6926	43.75	17.2432
43.8333	5.25148	43.8333	20.9826					47.25	8.32781					44.6667	4.78983	43.8333	8.3954	43.8333	6.6336					43.8333	4.89084	43.8333	4.402	43.8333	10.7546	45.1667	8.62696			44.4167	4.88291			43.8333	9.44085	43.8333	10.4532			43.8333	5.49361	43.8333	11.6963	43.8333	17.3057
43.9167	5.25646	43.9167	20.9852					47.3333	8.27671					44.75	4.81929	43.9167	8.51929	43.9167	6.64094					43.9167	4.89009	43.9167	4.35298	43.9167	10.7689	45.25	8.64423			44.5	4.88941			43.9167	9.46696	43.9167	10.3533			43.9167	5.51447	43.9167	11.7147	43.9167	17.3242
44	5.25515	44	21.0057					47.4167	8.3415					44.8333	4.81208	44	8.63497	44	6.61298					44	4.88623	44	4.37049	44	10.7913	45.3333	8.64238			44.5833	5.19811			44	9.47899	44	10.4058			44	5.51001	44	11.6978	44	17.3954
44.0833	5.24749	44.0833	21.0061					47.5	8.36302					44.9167	4.80334	44.0833	8.63754	44.0833	6.60589					44.0833	4.88662	44.0833	4.36569	44.0833	10.7847	45.4167	8.62093			44.6667	5.21979			44.0833	9.48476	44.0833	10.4423			44.0833	5.52188	44.0833	11.6939	44.0833	17.4075
44.1667	5.22649	44.1667	20.9857					47.5833	8.43035					45	4.82002	44.1667	8.55777	44.1667	6.59814					44.1667	4.85292	44.1667	4.40761	44.1667	10.7843	45.5	8.62216			44.75	5.18515			44.1667	9.51755	44.1667	10.5115			44.1667	5.55527	44.1667	11.6774	44.1667	17.4056
44.25	5.22809	44.25	20.9736					47.6667	8.37048					45.0833	4.82306	44.25	8.51828	44.25	6.59851					44.25	4.84344	44.25	4.37575	44.25	10.7729	45.5833	8.61061			44.8333	5.15403			44.25	9.50224	44.25	10.469			44.25	5.53997	44.25	11.6595	44.25	17.353
44.3333	5.23702	44.3333	20.9964					47.75	8.41366					45.1667	4.83896	44.3333	8.6477	44.3333	6.60289					44.3333	4.82152	44.3333	4.39464	44.3333	10.7934	45.6667	8.60681			44.9167	5.15185			44.3333	9.49662	44.3333	10.4924			44.3333	5.53815	44.3333	11.6051	44.3333	17.3044
44.4167	5.24841	44.4167	20.9979					47.8333	8.35368					45.25	4.82633	44.4167	8.7814	44.4167	6.61642					44.4167	4.82379	44.4167	4.39118	44.4167	10.7761	45.75	8.54836			45	5.12764			44.4167	9.43006	44.4167	10.4922			44.4167	5.53176	44.4167	11.5654	44.4167	17.2739
44.5	5.26376	44.5	20.9935					47.9167	8.37231					45.3333	4.82202	44.5	8.85131	44.5	6.62106					44.5	4.80301	44.5	4.42892	44.5	10.8175	45.8333	8.5058			45.0833	5.11659			44.5	9.45831	44.5	10.5202			44.5	5.5311	44.5	11.596	44.5	17.3002
44.5833	5.27052	44.5833	21.0167					48	8.3815					45.4167	4.83386	44.5833	8.79452	44.5833	6.6302					44.5833	4.80405	44.5833	4.39314	44.5833	10.8844	45.9167	8.52062			45.1667	5.09368			44.5833	9.48824	44.5833	10.5176			44.5833	5.537	44.5833	11.6217	44.5833	17.3595
44.6667	5.28606	44.6667	21.0309					48.0833	8.31951					45.5	4.8255	44.6667	8.77089	44.6667	6.62203					44.6667	4.83559	44.6667	4.37859	44.6667	11.3549	46	8.52209			45.25	5.09578			44.6667	9.51123	44.6667	10.493			44.6667	5.5401	44.6667	11.6447	44.6667	17.3976
44.75	5.29476	44.75	21.0436					48.1667	8.29767					45.5833	4.8466	44.75	8.75285	44.75	6.65649					44.75	4.87697	44.75	4.36192	44.75	10.9787	46.0833	8.59726			45.3333	4.91544			44.75	9.55707	44.75	10.5389			44.75	5.51457	44.75	11.5999	44.75	17.4218
44.8333	5.28801	44.8333	21.006					48.25	8.3082					45.6667	4.82207	44.8333	8.77784	44.8333	6.65648					44.8333	4.90414	44.8333	4.37824	44.8333	11.0067	46.1667	8.55389			45.4167	5.05368			44.8333	9.55828	44.8333	10.5487			44.8333	5.49538	44.8333	11.6222	44.8333	17.4706
44.9167	5.28052	44.9167	20.9687					48.3333	8.23724					45.75	4.82639	44.9167	8.814	44.9167	6.65754					44.9167	4.89591	44.9167	4.3555	44.9167	10.8605	46.25	8.57584			45.5	5.09276			44.9167	9.56401	44.9167	10.599			44.9167	5.4754	44.9167	11.5955	44.9167	17.5077
45	5.25067	45	21.0065					48.4167	8.24057					45.8333	4.78969	45	8.7938	45	6.65677					45	4.8792	45	4.35824	45	10.8686	46.3333	8.49076			45.5833	5.08455			45	9.62044	45	10.6528			45	5.49339	45	11.6141	45	17.5694
45.0833	5.23925	45.0833	21.0226					48.5	8.19718					45.9167	4.78141	45.0833	8.84972	45.0833	6.64478					45.0833	4.83708	45.0833	4.34281	45.0833	10.8644	46.4167	8.50647			45.6667	5.13712			45.0833	9.62854	45.0833	10.6713			45.0833	5.53248	45.0833	11.5925	45.0833	17.5891
45.1667	5.2344	45.1667	21.0473					48.5833	8.2809					46	4.7905	45.1667	8.74665	45.1667	6.61844					45.1667	4.83956	45.1667	4.35726	45.1667	10.8959	46.5	8.53072			45.75	4.8875			45.1667	9.62767	45.1667	10.6783			45.1667	5.54209	45.1667	11.5947	45.1667	17.6445
45.25	5.22174	45.25	21.0279					48.6667	8.19863					46.0833	4.82447	45.25	8.72642	45.25	6.61446					45.25	4.82031	45.25	4.33905	45.25	10.9695	46.5833	8.56029			45.8333	5.13893			45.25	9.54922	45.25	10.6578			45.25	5.56468	45.25	11.574	45.25	17.6862
45.3333	5.22501	45.3333	21.0161					48.75	8.28838					46.1667	4.86048	45.3333	8.74389	45.3333	6.61256					45.3333	4.84489	45.3333	4.34745	45.3333	10.9714	46.6667	8.58271			45.9167	5.16388			45.3333	9.5926	45.3333	10.5984			45.3333	5.5705	45.3333	11.5702	45.3333	17.7074
45.4167	5.21404	45.4167	20.9932					48.8333	8.30875					46.25	4.86411	45.4167	8.82066	45.4167	6.63192					45.4167	4.83845	45.4167	4.36927	45.4167	10.9577	46.75	8.56413			46	5.21178			45.4167	9.61227	45.4167	10.565			45.4167	5.61711	45.4167	11.5837	45.4167	17.7069
45.5	5.21671	45.5	20.9781					48.9167	8.37289					46.3333	4.88749	45.5	8.86846	45.5	6.62857					45.5	4.85387	45.5	4.41243	45.5	10.9488	46.8333	8.56377			46.0833	5.21503			45.5	9.70301	45.5	10.5922			45.5	5.62243	45.5	11.5977	45.5	17.7321
45.5833	5.2232	45.5833	20.9751					49	8.30883					46.4167	4.88943	45.5833	8.84292	45.5833	6.63215					45.5833	4.86847	45.5833	4.42462	45.5833	10.9285	46.9167	8.56683			46.1667	5.19655			45.5833	9.67714	45.5833	10.6969			45.5833	5.61138	45.5833	11.609	45.5833	17.7748
45.6667	5.22631	45.6667	20.9624					49.0833	8.23151					46.5	4.89403	45.6667	8.82516	45.6667	6.62987					45.6667	4.8775	45.6667	4.41342	45.6667	10.9194	47	8.57139			46.25	5.12411			45.6667	9.68809	45.6667	10.7435			45.6667	5.61428	45.6667	11.6303	45.6667	17.8028
45.75	5.23269	45.75	20.9425					49.1667	8.24394					46.5833	4.87563	45.75	8.84519	45.75	6.63186					45.75	4.87701	45.75	4.39617	45.75	10.9314	47.0833	8.54966			46.3333	5.16031			45.75	9.69622	45.75	10.7169			45.75	5.60256	45.75	11.6736	45.75	17.8423
45.8333	5.22022	45.8333	20.9643					49.25	8.23023					46.6667	4.88051	45.8333	8.90219	45.8333	6.62732					45.8333	4.87814	45.8333	4.4046	45.8333	10.9588	47.1667	8.528			46.4167	5.15111			45.8333	9.7638	45.8333	10.7098			45.8333	5.61206	45.8333	11.6835	45.8333	17.8302
45.9167	5.2239	45.9167	21.03					49.3333	8.34513					46.75	4.87762	45.9167	8.92556	45.9167	6.62859					45.9167	4.87727	45.9167	4.40123	45.9167	10.9679	47.25	8.45896			46.5	5.2326			45.9167	9.80665	45.9167	10.7554			45.9167	5.61038	45.9167	11.6963	45.9167	17.8348
46	5.22798	46	21.0329					49.4167	8.4063					46.8333	4.86874	46	8.89741	46	6.59347					46	4.87754	46	4.38391	46	10.9756	47.3333	8.46875			46.5833	5.26728			46	9.86386	46	10.841			46	5.64767	46	11.6785	46	17.8137
46.0833	5.23149	46.0833	21.055					49.5	8.45716					46.9167	4.85805	46.0833	8.87513	46.0833	6.59622					46.0833	4.88649	46.0833	4.39811	46.0833	10.9638	47.4167	8.4593			46.6667	5.29788			46.0833	9.82876	46.0833	10.8793			46.0833	5.65311	46.0833	11.6413	46.0833	17.8536
46.1667	5.22785	46.1667	21.0402					49.5833	8.38009					47	4.8983	46.1667	8.82284	46.1667	6.57792					46.1667	4.89144	46.1667	4.4057	46.1667	11.5508	47.5	8.50776			46.75	5.31347			46.1667	9.79844	46.1667	10.9097			46.1667	5.61541	46.1667	11.5856	46.1667	17.8796
46.25	5.22027	46.25	21.0883					49.6667	8.37881					47.0833	4.91165	46.25	8.85096	46.25	6.60681					46.25	4.90267	46.25	4.4167	46.25	11.5895	47.5833	8.53849			46.8333	5.28169			46.25	9.71006	46.25	10.8281			46.25	5.57448	46.25	11.59	46.25	17.9269
46.3333	5.2172	46.3333	21.0673					49.75	8.33024					47.1667	4.93015	46.3333	8.83919	46.3333	6.60629					46.3333	4.90499	46.3333	4.3984	46.3333	11.592	47.6667	8.59593			46.9167	5.33165			46.3333	9.68578	46.3333	10.8467			46.3333	5.55244	46.3333	11.6143	46.3333	17.9716
46.4167	5.21365	46.4167	21.0527					49.8333	8.35221					47.25	4.91681	46.4167	8.88188	46.4167	6.61371					46.4167	4.90901	46.4167	4.39824	46.4167	11.6222	47.75	8.60857			47	5.3797			46.4167	9.75244	46.4167	10.8272			46.4167	5.59277	46.4167	11.6435	46.4167	18.0675
46.5	5.21031	46.5	21.0254					49.9167	8.32909					47.3333	4.93033	46.5	8.9265	46.5	6.61555					46.5	4.91543	46.5	4.41226	46.5	11.6157	47.8333	8.599			47.0833	5.46255			46.5	9.7839	46.5	10.8165			46.5	5.59111	46.5	11.6429	46.5	18.1163
46.5833	5.2226	46.5833	21.0323					50	8.28848					47.4167	4.93013	46.5833	8.92774	46.5833	6.63723					46.5833	4.94112	46.5833	4.41393	46.5833	11.6415	47.9167	8.58501			47.1667	5.434			46.5833	9.77777	46.5833	10.7487			46.5833	5.59883	46.5833	11.7037	46.5833	18.1837
46.6667	5.23628	46.6667	21.0488					50.0833	8.31776					47.5	4.94611	46.6667	8.90246	46.6667	6.65471					46.6667	4.97073	46.6667	4.37512	46.6667	11.6	48	8.57825			47.25	5.37942			46.6667	9.76411	46.6667	10.5824			46.6667	5.58342	46.6667	11.6929	46.6667	18.1863
46.75	5.24977	46.75	21.0525					50.1667	8.31049					47.5833	4.94624	46.75	8.92147	46.75	6.6556					46.75	5.00693	46.75	4.3378	46.75	11.5866	48.0833	8.5719			47.3333	5.31644			46.75	9.75456	46.75	10.611			46.75	5.57154	46.75	11.6933	46.75	18.2091
46.8333	5.247	46.8333	21.0839					50.25	8.37975					47.6667	4.95098	46.8333	8.94304	46.8333	6.64303					46.8333	4.98057	46.8333	4.33212	46.8333	11.5662	48.1667	8.55803			47.4167	5.31984			46.8333	9.75566	46.8333	10.6086			46.8333	5.55636	46.8333	11.6671	46.8333	18.2184
46.9167	5.24327	46.9167	21.0992					50.3333	8.38622					47.75	4.92641	46.9167	8.97952	46.9167	6.64487					46.9167	4.97136	46.9167	4.35869	46.9167	11.6238	48.25	8.5796			47.5	5.34507			46.9167	9.7392	46.9167	10.5734			46.9167	5.51824	46.9167	11.7036	46.9167	18.2512
47	5.22004	47	21.0803					50.4167	8.37634					47.8333	4.93198	47	8.96454	47	6.63167					47	4.94137	47	4.37722	47	11.6429	48.3333	8.58234			47.5833	5.36108			47	9.70838	47	10.5687			47	5.514	47	11.6791	47	18.2728
47.0833	5.22548	47.0833	21.0346					50.5	8.30362					47.9167	4.9477	47.0833	9.07237	47.0833	6.63875					47.0833	4.94748	47.0833	4.38802	47.0833	11.6595	48.4167	8.55908			47.6667	5.35572			47.0833	9.78244	47.0833	10.5835			47.0833	5.52967	47.0833	11.6133	47.0833	18.3178
47.1667	5.22653	47.1667	21.0109					50.5833	8.16258					48	4.94934	47.1667	9.13939	47.1667	6.61229					47.1667	4.94369	47.1667	4.40596	47.1667	11.651	48.5	8.51475			47.75	5.37716			47.1667	9.79401	47.1667	10.67			47.1667	5.53923	47.1667	11.5522	47.1667	18.3651
47.25	5.2449	47.25	21.0111					50.6667	8.24097					48.0833	4.93932	47.25	9.12419	47.25	6.62106					47.25	4.95448	47.25	4.41224	47.25	11.6595	48.5833	8.48501			47.8333	5.34924			47.25	9.80258	47.25	10.5642			47.25	5.5278	47.25	11.5845	47.25	18.3938
47.3333	5.23782	47.3333	20.9865					50.75	8.346					48.1667	4.92373	47.3333	9.06372	47.3333	6.60804					47.3333	4.93834	47.3333	4.40575	47.3333	11.6623	48.6667	8.45267			47.9167	5.37863			47.3333	9.7619	47.3333	10.5748			47.3333	5.54383	47.3333	11.6556	47.3333	18.4274
47.4167	5.23039	47.4167	20.9893					50.8333	8.40455					48.25	4.93797	47.4167	9.0137	47.4167	6.61625					47.4167	4.91159	47.4167	4.40536	47.4167	11.6356	48.75	8.45239			48	5.3953			47.4167	9.77326	47.4167	10.5719			47.4167	5.55482	47.4167	11.6993	47.4167	18.4887
47.5	5.20547	47.5	20.9843					50.9167	8.33621					48.3333	4.93028	47.5	8.94779	47.5	6.60217					47.5	4.90613	47.5	4.40745	47.5	11.6312	48.8333	8.46474			48.0833	5.44443			47.5	9.78783	47.5	10.5945			47.5	5.56022	47.5	11.6791	47.5	18.5388
47.5833	5.18345	47.5833	20.9908					51	8.26648					48.4167	4.94831	47.5833	8.92806	47.5833	6.58464					47.5833	4.91018	47.5833	4.4288	47.5833	11.5997	48.9167	8.50596			48.1667	5.43974			47.5833	9.86059	47.5833	10.5929			47.5833	5.55164	47.5833	11.6574	47.5833	18.6147
47.6667	5.16801	47.6667	20.9686					51.0833	8.17916					48.5	4.94761	47.6667	8.91021	47.6667	6.6064					47.6667	4.93574	47.6667	4.45021	47.6667	11.616	49	8.53132			48.25	5.43059			47.6667	9.85604	47.6667	10.6208			47.6667	5.548	47.6667	11.6577	47.6667	18.6023
47.75	5.18371	47.75	20.9571					51.1667	8.26091					48.5833	4.9721	47.75	9.02231	47.75	6.63118					47.75	4.91739	47.75	4.48503	47.75	11.5958	49.0833	8.50379			48.3333	5.38429			47.75	9.92792	47.75	10.7087			47.75	5.55324	47.75	11.6842	47.75	18.6583
47.8333	5.19481	47.8333	20.9737					51.25	8.33162					48.6667	4.94642	47.8333	8.96415	47.8333	6.64178					47.8333	4.89201	47.8333	4.46556	47.8333	11.639	49.1667	8.45826			48.4167	5.35053			47.8333	9.93767	47.8333	10.6678			47.8333	5.541	47.8333	11.7149	47.8333	18.6836
47.9167	5.19623	47.9167	20.9716					51.3333	8.43693					48.75	4.93932	47.9167	9.07797	47.9167	6.61167					47.9167	4.8769	47.9167	4.45053	47.9167	11.627	49.25	8.5065			48.5	5.34126			47.9167	9.97994	47.9167	10.594			47.9167	5.54934	47.9167	11.7323	47.9167	18.7306
48	5.19298	48	20.9723					51.4167	8.43553					48.8333	4.92197	48	9.1054	48	6.59785					48	4.90775	48	4.41028	48	11.6602	49.3333	8.51724			48.5833	5.34891			48	9.98368	48	10.5819			48	5.56715	48	11.7832	48	18.7661
48.0833	5.20016	48.0833	20.9601					51.5	8.4154					48.9167	4.92231	48.0833	9.31894	48.0833	6.60337					48.0833	4.92468	48.0833	4.42834	48.0833	11.6739	49.4167	8.55829			48.6667	5.34728			48.0833	9.97316	48.0833	10.6187			48.0833	5.56668	48.0833	11.7887	48.0833	18.7859
48.1667	5.19791	48.1667	20.9779					51.5833	8.42611					49	4.90213	48.1667	9.31577	48.1667	6.60138					48.1667	4.91178	48.1667	4.44879	48.1667	11.6627	49.5	8.50788			48.75	5.30025			48.1667	9.91976	48.1667	10.7161			48.1667	5.56695	48.1667	11.7616	48.1667	18.8703
48.25	5.19935	48.25	21.0006					51.6667	8.44759					49.0833	4.88687	48.25	9.40455	48.25	6.60989					48.25	4.90627	48.25	4.45639	48.25	11.6599	49.5833	8.52137			48.8333	5.29365			48.25	9.89384	48.25	10.741			48.25	5.57278	48.25	11.7216	48.25	18.8953
48.3333	5.18757	48.3333	20.9956					51.75	8.4544					49.1667	4.91457	48.3333	9.25803	48.3333	6.63582					48.3333	4.93202	48.3333	4.43465	48.3333	11.6296	49.6667	8.49437			48.9167	5.38042			48.3333	9.88212	48.3333	10.8259			48.3333	5.58389	48.3333	11.6972	48.3333	18.9347
48.4167	5.19159	48.4167	20.9833					51.8333	8.46121					49.25	4.93124	48.4167	9.19416	48.4167	6.65122					48.4167	4.95722	48.4167	4.40138	48.4167	11.6515	49.75	8.4474			49	5.45645			48.4167	9.94714	48.4167	10.7902			48.4167	5.59972	48.4167	11.703	48.4167	18.9327
48.5	5.19535	48.5	20.9146					51.9167	8.44444					49.3333	4.97368	48.5	9.07166	48.5	6.65206					48.5	4.95444	48.5	4.39429	48.5	11.6495	49.8333	8.47295			49.0833	5.49555			48.5	9.98536	48.5	10.7623			48.5	5.57307	48.5	11.6944	48.5	18.9435
48.5833	5.2103	48.5833	20.9526					52	8.44233					49.4167	4.94901	48.5833	9.06024	48.5833	6.63578					48.5833	4.97705	48.5833	4.38756	48.5833	11.6604	49.9167	8.48107			49.1667	5.44637			48.5833	9.98757	48.5833	10.7081			48.5833	5.56208	48.5833	11.7216	48.5833	18.9317
48.6667	5.21125	48.6667	20.923					52.0833	8.43262					49.5	4.94122	48.6667	9.00733	48.6667	6.63402					48.6667	4.98838	48.6667	4.39323	48.6667	11.648	50	8.52459			49.25	5.40512			48.6667	9.98968	48.6667	10.7921			48.6667	5.57108	48.6667	11.7184	48.6667	18.9634
48.75	5.21904	48.75	20.9501					52.1667	8.42292					49.5833	4.93033	48.75	8.99741	48.75	6.63069					48.75	4.9895	48.75	4.40866	48.75	11.6392	50.0833	8.49596			49.3333	5.38613			48.75	9.93241	48.75	10.8197			48.75	5.58593	48.75	11.7536	48.75	18.9997
48.8333	5.21761	48.8333	20.8672					52.25	8.41322					49.6667	4.95118	48.8333	9.15061	48.8333	6.6293					48.8333	4.99541	48.8333	4.43087	48.8333	11.629	50.1667	8.53459			49.4167	5.43159			48.8333	9.92081	48.8333	10.8357			48.8333	5.6202	48.8333	11.755	48.8333	19.0457
48.9167	5.22152	48.9167	20.9356					52.3333	8.40351					49.75	4.95946	48.9167	9.38869	48.9167	6.6179					48.9167	4.99002	48.9167	4.43687	48.9167	11.6199	50.25	8.53095			49.5	5.48945			48.9167	9.85811	48.9167	10.8353			48.9167	5.61833	48.9167	11.7491	48.9167	19.0433
49	5.20802	49	20.9389					52.4167	8.39381					49.8333	4.94238	49	9.63082	49	6.61313					49	5.00142	49	4.44917	49	11.6095	50.3333	8.55536			49.5833	5.52981			49	9.81419	49	10.8389			49	5.68469	49	11.7073	49	19.0465
49.0833	5.20387	49.0833	20.9788					52.5	8.3841					49.9167	4.92658	49.0833	9.65826	49.0833	6.60611					49.0833	4.94722	49.0833	4.45887	49.0833	11.6116	50.4167	8.52992			49.6667	5.57576			49.0833	9.80949	49.0833	10.9282			49.0833	5.63888	49.0833	11.6864	49.0833	19.0205
49.1667	5.19119	49.1667	20.9404					52.5833	8.41522					50	4.92172	49.1667	9.67552	49.1667	6.61757					49.1667	4.95187	49.1667	4.45415	49.1667	11.6279	50.5	8.50824			49.75	5.52233			49.1667	9.8245	49.1667	10.8754			49.1667	5.605	49.1667	11.6726	49.1667	19.0024
49.25	5.20262	49.25	20.8988					52.6667	8.40562					50.0833	4.93169	49.25	9.66594	49.25	6.62193					49.25	4.93281	49.25	4.42947	49.25	11.6189	50.5833	8.50172			49.8333	5.42768			49.25	9.83703	49.25	10.8941			49.25	5.56905	49.25	11.6727	49.25	18.9862
49.3333	5.20616	49.3333	20.8216					52.75	8.41308					50.1667	4.91681	49.3333	9.62581	49.3333	6.62419					49.3333	4.91647	49.3333	4.36467	49.3333	11.6061	50.6667	8.49576			49.9167	5.32418			49.3333	9.82946	49.3333	10.8374			49.3333	5.58943	49.3333	11.6881	49.3333	19.0421
49.4167	5.21641	49.4167	20.8457					52.8333	8.42053					50.25	4.93156	49.4167	9.57243	49.4167	6.61682					49.4167	4.88605	49.4167	4.34641	49.4167	11.5967	50.75	8.50113			50	5.40259			49.4167	9.87309	49.4167	10.8597			49.4167	5.60102	49.4167	11.667	49.4167	19.0783
49.5	5.21135	49.5	20.8658					52.9167	8.42798					50.3333	4.94188	49.5	9.52099	49.5	6.61287					49.5	4.89131	49.5	4.30631	49.5	11.6109	50.8333	8.4548			50.0833	5.48113			49.5	9.85381	49.5	10.8087			49.5	5.58992	49.5	11.6494	49.5	19.1331
49.5833	5.2116	49.5833	20.9014					53	8.43544					50.4167	4.95014	49.5833	9.57794	49.5833	6.60816					49.5833	4.90844	49.5833	4.34962	49.5833	11.6148	50.9167	8.45142			50.1667	5.49791			49.5833	9.86949	49.5833	10.825			49.5833	5.53966	49.5833	11.6271	49.5833	19.1196
49.6667	5.20962	49.6667	20.9016					53.0833	8.44289					50.5	4.94219	49.6667	9.63924	49.6667	6.61804					49.6667	4.92527	49.6667	4.3416	49.6667	11.6005	51	8.47523			50.25	5.52712			49.6667	9.82713	49.6667	10.8415			49.6667	5.53339	49.6667	11.6616	49.6667	19.1669
49.75	5.22473	49.75	20.9377											50.5833	4.9196	49.75	9.54184	49.75	6.62921					49.75	4.94482	49.75	4.37664	49.75	11.6034	51.0833	8.54867			50.3333	5.49464			49.75	9.84799	49.75	10.8702			49.75	5.54705	49.75	11.6649	49.75	19.2001
49.8333	5.23792	49.8333	20.9461											50.6667	4.92159	49.8333	9.46269	49.8333	6.63729					49.8333	4.95235	49.8333	4.35758	49.8333	11.6267	51.1667	8.57619			50.4167	5.41392			49.8333	9.83922	49.8333	10.9212			49.8333	5.57431	49.8333	11.6858	49.8333	19.2684
49.9167	5.2466	49.9167	20.9802											50.75	4.90378	49.9167	9.67921	49.9167	6.64544					49.9167	4.95303	49.9167	4.36237	49.9167	11.6416	51.25	8.56312			50.5	5.18114			49.9167	9.85964	49.9167	10.9542			49.9167	5.57308	49.9167	11.6667	49.9167	19.3009
50	5.23646	50	20.9806											50.8333	4.92174	50	9.89572	50	6.65823					50	4.93895	50	4.37283	50	11.6054	51.3333	8.54636			50.5833	5.15477			50	9.98842	50	10.9925			50	5.54986	50	11.7079	50	19.2764
50.0833	5.22387	50.0833	20.9798											50.9167	4.91127	50.0833	10.0606	50.0833	6.66748					50.0833	4.96601	50.0833	4.36669	50.0833	11.5684	51.4167	8.54175			50.6667	5.27653			50.0833	10.0401	50.0833	10.9466			50.0833	5.55511	50.0833	11.7171	50.0833	19.2235
50.1667	5.21875	50.1667	20.9449											51	4.94687	50.1667	10.1528	50.1667	6.64686					50.1667	4.95905	50.1667	4.3882	50.1667	11.556	51.5	8.5583			50.75	5.43355			50.1667	10.049	50.1667	10.9005			50.1667	5.54599	50.1667	11.7496	50.1667	19.1758
50.25	5.21518	50.25	20.9202											51.0833	4.94193	50.25	9.98775	50.25	6.61708					50.25	4.94779	50.25	4.36458	50.25	11.6157	51.5833	8.56932			50.8333	5.39743			50.25	9.82992	50.25	10.8981			50.25	5.54921	50.25	11.7363	50.25	19.1576
50.3333	5.22127	50.3333	20.913											51.1667	4.94847	50.3333	9.72449	50.3333	6.59291					50.3333	4.92892	50.3333	4.375	50.3333	11.6234	51.6667	8.6076			50.9167	5.37516			50.3333	9.82144	50.3333	10.8351			50.3333	5.54528	50.3333	11.6988	50.3333	19.1538
50.4167	5.20576	50.4167	20.9387											51.25	4.93244	50.4167	9.56722	50.4167	6.61883					50.4167	4.92257	50.4167	4.37603	50.4167	11.6613	51.75	8.60448			51	5.36799			50.4167	9.80868	50.4167	10.8093			50.4167	5.56309	50.4167	11.6731	50.4167	19.1957
50.5	5.21769	50.5	20.9511											51.3333	4.94963	50.5	9.50584	50.5	6.61986					50.5	4.94609	50.5	4.42151	50.5	11.6661	51.8333	8.56739			51.0833	5.46913			50.5	9.87481	50.5	10.7465			50.5	5.57662	50.5	11.6393	50.5	19.226
50.5833	5.21409	50.5833	20.9919											51.4167	4.96888	50.5833	9.53145	50.5833	6.62326					50.5833	4.94686	50.5833	4.4926	50.5833	11.7215	51.9167	8.517			51.1667	5.47742			50.5833	9.92432	50.5833	10.7458			50.5833	5.55737	50.5833	11.6471	50.5833	19.2729
50.6667	5.21562	50.6667	20.9757											51.5	4.96998	50.6667	9.58984	50.6667	6.62837					50.6667	4.95745	50.6667	4.50331	50.6667	11.7196	52	8.49184			51.25	5.46815			50.6667	9.87155	50.6667	10.803			50.6667	5.54791	50.6667	11.6562	50.6667	19.3169
50.75	5.20455	50.75	20.9708											51.5833	4.94322	50.75	9.71331	50.75	6.64893					50.75	4.95925	50.75	4.5168	50.75	11.707	52.0833	8.51296			51.3333	5.42241			50.75	9.89394	50.75	10.8699			50.75	5.51075	50.75	11.695	50.75	19.3855
50.8333	5.20129	50.8333	20.9402											51.6667	4.93359	50.8333	9.60998	50.8333	6.65619					50.8333	4.95918	50.8333	4.52623	50.8333	11.682	52.1667	8.5341			51.4167	5.44024			50.8333	9.84358	50.8333	10.8407			50.8333	5.51998	50.8333	11.7181	50.8333	19.4022
50.9167	5.20736	50.9167	20.8896											51.75	4.91195	50.9167	9.52841	50.9167	6.65806					50.9167	4.96046	50.9167	4.57286	50.9167	11.6896	52.25	8.54596			51.5	5.46397			50.9167	9.9356	50.9167	10.7739			50.9167	5.51593	50.9167	11.738	50.9167	19.4201
51	5.21322	51	20.8676											51.8333	4.92486	51	9.39291	51	6.65945					51	4.95316	51	4.58969	51	11.6889	52.3333	8.54682			51.5833	5.47737			51	10.0376	51	10.7855			51	5.55204	51	11.7265	51	19.439
51.0833	5.19628	51.0833	20.8474											51.9167	4.91629	51.0833	9.56887	51.0833	6.65335					51.0833	4.9361	51.0833	4.57773	51.0833	11.6824	52.4167	8.52792			51.6667	5.44229			51.0833	10.0439	51.0833	10.8501			51.0833	5.57167	51.0833	11.7178	51.0833	19.4757
51.1667	5.18823	51.1667	20.8898											52	4.96656	51.1667	9.5215	51.1667	6.64945					51.1667	4.94704	51.1667	4.56549	51.1667	11.6957	52.5	8.52469			51.75	5.39686			51.1667	10.0229	51.1667	11.0959			51.1667	5.5928	51.1667	11.671	51.1667	19.4985
51.25	5.16728	51.25	20.8759											52.0833	4.98602	51.25	9.57131	51.25	6.65247					51.25	4.94639	51.25	4.60184	51.25	11.7006	52.5833	8.53927			51.8333	5.29613			51.25	10.0018	51.25	11.0142			51.25	5.57603	51.25	11.6453	51.25	19.5019
51.3333	5.17065	51.3333	20.9214											52.1667	4.99139	51.3333	9.67846	51.3333	6.66239					51.3333	4.95118	51.3333	4.6359	51.3333	11.7177	52.6667	8.54475			51.9167	5.26579			51.3333	9.98696	51.3333	11.0573			51.3333	5.55526	51.3333	11.6288	51.3333	19.5301
51.4167	5.17551	51.4167	20.8989											52.25	4.95715	51.4167	9.85413	51.4167	6.6617					51.4167	4.93017	51.4167	4.66858	51.4167	11.7218	52.75	8.56997			52	5.23969			51.4167	9.91232	51.4167	10.8992			51.4167	5.51781	51.4167	11.6318	51.4167	19.5311
51.5	5.20417	51.5	20.9671											52.3333	4.93453	51.5	10.1455	51.5	6.6525					51.5	4.93969	51.5	4.61263	51.5	11.7332	52.8333	8.53807			52.0833	5.35046			51.5	9.93059	51.5	10.983			51.5	5.55777	51.5	11.6527	51.5	19.5408
51.5833	5.21605	51.5833	20.8901											52.4167	4.90995	51.5833	9.92611	51.5833	6.66305					51.5833	4.94854	51.5833	4.52286	51.5833	11.7379	52.9167	8.48082			52.1667	5.45761			51.5833	9.95635	51.5833	10.9325			51.5833	5.57223	51.5833	11.6935	51.5833	19.5015
51.6667	5.22637	51.6667	20.9198											52.5	4.88892	51.6667	9.98334	51.6667	6.67298					51.6667	4.97727	51.6667	4.52836	51.6667	11.713	53	8.3834			52.25	5.46857			51.6667	9.93539	51.6667	10.9286			51.6667	5.59467	51.6667	11.7235	51.6667	19.5324
51.75	5.23194	51.75	20.8085											52.5833	4.89828	51.75	9.84291	51.75	6.68108					51.75	4.97151	51.75	4.52194	51.75	11.7257	53.0833	8.4085			52.3333	5.49601			51.75	9.91501	51.75	10.9261			51.75	5.59473	51.75	11.7421	51.75	19.5465
51.8333	5.23319	51.8333	20.815											52.6667	4.89456	51.8333	9.86751	51.8333	6.70507					51.8333	4.98926	51.8333	4.55032	51.8333	11.7242	53.1667	8.43601			52.4167	5.52818			51.8333	10.0726	51.8333	10.9739			51.8333	5.59598	51.8333	11.7415	51.8333	19.5793
51.9167	5.22825	51.9167	20.8215											52.75	4.92797	51.9167	9.88357	51.9167	6.72195					51.9167	4.98026	51.9167	4.52191	51.9167	11.7652	53.25	8.47783			52.5	5.57571			51.9167	9.98493	51.9167	11.0118			51.9167	5.58173	51.9167	11.7718	51.9167	19.6186
52	5.22316	52	20.828											52.8333	4.92957	52	10.0858	52	6.74376					52	4.97468	52	4.59384	52	11.764	53.3333	8.4784			52.5833	5.60396			52	10.0202	52	11.0194			52	5.56243	52	11.79	52	19.6195
52.0833	5.21797	52.0833	20.891											52.9167	4.93402	52.0833	10.2881	52.0833	6.73129					52.0833	4.95727	52.0833	4.69846	52.0833	11.7549	53.4167	8.48919			52.6667	5.60785			52.0833	9.95149	52.0833	11.0299			52.0833	5.57696	52.0833	11.7896	52.0833	19.6592
52.1667	5.22255	52.1667	20.9719											53	4.93057	52.1667	10.4903	52.1667	6.7132					52.1667	4.92805	52.1667	4.75722	52.1667	11.719	53.5	8.47108			52.75	5.6294			52.1667	9.97793	52.1667	10.9948			52.1667	5.57437	52.1667	11.7575	52.1667	19.6285
52.25	5.22539	52.25	21.0323											53.0833	4.94022	52.25	10.6926	52.25	6.70165					52.25	4.92596	52.25	4.72656	52.25	11.7185	53.5833	8.45105			52.8333	5.60557			52.25	9.94285	52.25	11.0421			52.25	5.56791	52.25	11.7707	52.25	19.647
52.3333	5.23794	52.3333	21.0534											53.1667	4.94202	52.3333	10.7945	52.3333	6.69365					52.3333	4.92489	52.3333	4.65333	52.3333	11.7126	53.6667	8.36794			52.9167	5.58611			52.3333	9.91609	52.3333	10.9983			52.3333	5.55033	52.3333	11.7912	52.3333	19.6152
52.4167	5.23455	52.4167	20.9954											53.25	4.93337	52.4167	10.8498	52.4167	6.6931					52.4167	4.93719	52.4167	4.66631	52.4167	11.7314	53.75	8.39984			53	5.52844			52.4167	9.98353	52.4167	11.03			52.4167	5.55401	52.4167	11.8182	52.4167	19.6438
52.5	5.23327	52.5	20.9563											53.3333	4.91089	52.5	10.8701	52.5	6.71623					52.5	4.94045	52.5	4.65766	52.5	11.6987	53.8333	8.48442			53.0833	5.49207			52.5	10.0263	52.5	10.9362			52.5	5.56491	52.5	11.806	52.5	19.6048
52.5833	5.23189	52.5833	20.9251											53.4167	4.92745	52.5833	10.8885	52.5833	6.71281					52.5833	4.93772	52.5833	4.65477	52.5833	11.7147	53.9167	8.50875			53.1667	5.49612			52.5833	10.0748	52.5833	10.9773			52.5833	5.59096	52.5833	11.799	52.5833	19.6561
52.6667	5.23987	52.6667	20.9564											53.5	4.94059	52.6667	10.859	52.6667	6.71897					52.6667	4.94882	52.6667	4.59761	52.6667	11.6999	54	8.50676			53.25	5.48622			52.6667	10.0771	52.6667	10.9572			52.6667	5.60306	52.6667	11.7985	52.6667	19.6326
52.75	5.23301	52.75	20.9772											53.5833	4.94073	52.75	10.8589	52.75	6.69983					52.75	4.94916	52.75	4.59477	52.75	11.7228	54.0833	8.48537			53.3333	5.53504			52.75	10.1086	52.75	10.9639			52.75	5.60382	52.75	11.7992	52.75	19.6618
52.8333	5.23933	52.8333	20.999											53.6667	4.92282	52.8333	10.8654	52.8333	6.71082					52.8333	4.96262	52.8333	4.6026	52.8333	11.7236	54.1667	8.56651			53.4167	5.54738			52.8333	9.99267	52.8333	10.8605			52.8333	5.55996	52.8333	11.8044	52.8333	19.6565
52.9167	5.24286	52.9167	20.9835											53.75	4.9032	52.9167	10.8677	52.9167	6.69559					52.9167	4.98204	52.9167	4.6365	52.9167	11.7302	54.25	8.54452			53.5	5.58631			52.9167	10.0778	52.9167	10.861			52.9167	5.54635	52.9167	11.7937	52.9167	19.7002
53	5.2528	53	20.915											53.8333	4.90212	53	10.8722	53	6.69695					53	4.97542	53	4.60176	53	11.7312	54.3333	8.52873			53.5833	5.54813			53	10.0239	53	10.9445			53	5.5564	53	11.7979	53	19.7979
53.0833	5.23244	53.0833	20.8179											53.9167	4.90539	53.0833	10.8321	53.0833	6.69624					53.0833	4.95425	53.0833	4.66569	53.0833	11.7415	54.4167	8.48242			53.6667	5.577			53.0833	10.1153	53.0833	11.0791			53.0833	5.56814	53.0833	11.7877	53.0833	19.8343
53.1667	5.22569	53.1667	20.822											54	4.91805	53.1667	10.8007	53.1667	6.70208					53.1667	4.93648	53.1667	4.74427	53.1667	11.7611	54.5	8.47758			53.75	5.57131			53.1667	10.0106	53.1667	11.0467			53.1667	5.56917	53.1667	11.7971	53.1667	19.8771
53.25	5.22616	53.25	20.826											54.0833	4.90715	53.25	10.762	53.25	6.72033					53.25	4.93264	53.25	4.85344	53.25	11.7686	54.5833	8.50307			53.8333	5.58669			53.25	10.0332	53.25	10.9397			53.25	5.55816	53.25	11.8113	53.25	19.8742
53.3333	5.24984	53.3333	20.8434											54.1667	4.92906	53.3333	10.731	53.3333	6.70291					53.3333	4.95604	53.3333	4.8366	53.3333	11.7623	54.6667	8.51911			53.9167	5.54541			53.3333	9.90977	53.3333	10.9713			53.3333	5.57249	53.3333	11.831	53.3333	19.919
53.4167	5.25651													54.25	4.92286	53.4167	10.8011	53.4167	6.72129					53.4167	4.96048	53.4167	4.76109	53.4167	11.76	54.75	8.51478			54	5.5332			53.4167	9.84435	53.4167	11.0153			53.4167	5.57662	53.4167	11.8249	53.4167	19.9534
53.5	5.25176													54.3333	4.94409	53.5	10.8356	53.5	6.69737					53.5	4.97557	53.5	4.75796	53.5	11.7523	54.8333	8.48608			54.0833	5.53521			53.5	9.80412	53.5	11.0768			53.5	5.5528	53.5	11.8122	53.5	20.0073
53.5833	5.24164													54.4167	4.93357	53.5833	10.8504	53.5833	6.71824					53.5833	4.9949	53.5833	4.83703	53.5833	11.753	54.9167	8.50665			54.1667	5.56673			53.5833	9.83478	53.5833	11.0228			53.5833	5.57453	53.5833	11.8064	53.5833	20.0214
53.6667	5.22926													54.5	4.93244	53.6667	10.8234	53.6667	6.70943					53.6667	5.01047	53.6667	4.88524	53.6667	11.7702	55	8.52973			54.25	5.56852			53.6667	10.0104	53.6667	11.0133			53.6667	5.57294	53.6667	11.8294	53.6667	20.0271
53.75	5.21773													54.5833	4.92276	53.75	10.7724	53.75	6.71097					53.75	5.02949	53.75	4.84758	53.75	11.7927	55.0833	8.55203			54.3333	5.57999			53.75	10.1495	53.75	11.056			53.75	5.60673	53.75	11.8425	53.75	19.9964
53.8333	5.22563													54.6667	4.91644	53.8333	10.7952	53.8333	6.68965					53.8333	5.00474	53.8333	4.7986	53.8333	11.7958	55.1667	8.56785			54.4167	5.59066			53.8333	10.1462	53.8333	11.1093			53.8333	5.58517	53.8333	11.8185	53.8333	19.9986
53.9167	5.2356													54.75	4.92481	53.9167	10.8159	53.9167	6.69053					53.9167	4.99387	53.9167	4.75987	53.9167	11.7839	55.25	8.56427			54.5	5.60435			53.9167	10.1447	53.9167	11.1739			53.9167	5.60953	53.9167	11.815	53.9167	19.9722
54	5.23908													54.8333	4.93895	54	10.8202	54	6.70176					54	4.94997	54	4.79115	54	11.7788	55.3333	8.52187			54.5833	5.61505			54	9.96398	54	11.1625			54	5.6142	54	11.8084	54	20.0004
54.0833	5.22973													54.9167	4.95185	54.0833	10.8122	54.0833	6.71491					54.0833	4.98377	54.0833	4.75247	54.0833	11.7777	55.4167	8.49812			54.6667	5.59432			54.0833	9.93355	54.0833	11.2022			54.0833	5.62192	54.0833	11.8044	54.0833	20.0097
54.1667	5.2265													55	4.92515	54.1667	10.8514	54.1667	6.71181					54.1667	4.99881	54.1667	4.68721	54.1667	11.7902	55.5	8.47554			54.75	5.59196			54.1667	9.91267	54.1667	11.1742			54.1667	5.63848	54.1667	11.7537	54.1667	20.0318
54.25	5.23156													55.0833	4.90671	54.25	10.866	54.25	6.71592					54.25	5.02878	54.25	4.66674	54.25	11.7757	55.5833	8.45627			54.8333	5.5498			54.25	9.92019	54.25	11.2021			54.25	5.63813	54.25	11.7268	54.25	20.0542
54.3333	5.23027													55.1667	4.90739	54.3333	10.8767	54.3333	6.70359					54.3333	5.0149	54.3333	4.68547	54.3333	11.7793	55.6667	8.43686			54.9167	5.53551			54.3333	10.0435	54.3333	11.178			54.3333	5.65078	54.3333	11.7296	54.3333	20.0801
54.4167	5.22647													55.25	4.94422	54.4167	10.8516	54.4167	6.6981					54.4167	5.02215	54.4167	4.681	54.4167	11.7731	55.75	8.47963			55	5.53878			54.4167	10.1292	54.4167	11.1705			54.4167	5.63882	54.4167	11.7591	54.4167	20.0942
54.5	5.235													55.3333	4.9673	54.5	10.8578	54.5	6.69346					54.5	5.02728	54.5	4.66925	54.5	11.7868	55.8333	8.5333			55.0833	5.5393			54.5	10.1735	54.5	11.0534			54.5	5.68549	54.5	11.7769	54.5	20.0808
54.5833	5.24462													55.4167	4.95708	54.5833	10.889	54.5833	6.69236					54.5833	5.0344	54.5833	4.64917	54.5833	11.815	55.9167	8.55188			55.1667	5.57828			54.5833	10.0057	54.5833	11.051			54.5833	5.72302	54.5833	11.802	54.5833	20.0433
54.6667	5.25579													55.5	4.93003	54.6667	10.927	54.6667	6.69467					54.6667	5.00986	54.6667	4.63169	54.6667	11.8119	56	8.56054			55.25	5.61581			54.6667	9.93219	54.6667	11.093			54.6667	5.77225	54.6667	11.7943	54.6667	20.0342
54.75	5.25924													55.5833	4.91104	54.75	10.9607	54.75	6.70113					54.75	4.95397	54.75	4.58882	54.75	11.8154	56.0833	8.57984			55.3333	5.73319			54.75	10.1481	54.75	11.1504			54.75	5.74419	54.75	11.8014	54.75	20.0499
54.8333	5.26426													55.6667	4.90744	54.8333	10.9692	54.8333	6.71779					54.8333	4.94671	54.8333	4.61279	54.8333	11.7973	56.1667	8.58416			55.4167	5.75936			54.8333	10.364	54.8333	11.1758			54.8333	5.72993	54.8333	11.7789	54.8333	20.0875
54.9167	5.25981													55.75	4.91544	54.9167	10.9579	54.9167	6.73544					54.9167	4.95941	54.9167	4.63013	54.9167	11.8081	56.25	8.56458			55.5	5.78006			54.9167	10.2541	54.9167	11.1721			54.9167	5.70224	54.9167	11.8123	54.9167	20.1242
55	5.25109													55.8333	4.91601	55	10.9593	55	6.73176					55	4.99212	55	4.61153	55	11.8133	56.3333	8.55082			55.5833	5.72965			55	10.1442	55	11.167			55	5.69602	55	11.8096	55	20.1441
55.0833	5.24823													55.9167	4.93409	55.0833	10.9278	55.0833	6.7005					55.0833	4.99267	55.0833	4.60533	55.0833	11.8236	56.4167	8.56112			55.6667	5.738			55.0833	10.0865	55.0833	11.16			55.0833	5.64568	55.0833	11.8298	55.0833	20.1833
55.1667	5.2494													56	4.92638	55.1667	10.9121	55.1667	6.68852					55.1667	5.00152	55.1667	4.58828	55.1667	11.8066	56.5	8.57677			55.75	5.74326			55.1667	10.1081	55.1667	11.1698			55.1667	5.61929	55.1667	11.7867	55.1667	20.223
55.25	5.25552													56.0833	4.9406	55.25	10.9121	55.25	6.66235					55.25	4.99996	55.25	4.6655	55.25	11.7984	56.5833	8.61008			55.8333	5.7236			55.25	10.1006	55.25	11.1894			55.25	5.61823	55.25	11.7563	55.25	20.2084
55.3333	5.24716													56.1667	4.92982	55.3333	10.8991	55.3333	6.68713					55.3333	4.99562	55.3333	4.66079	55.3333	11.7959	56.6667	8.60485			55.9167	5.73034			55.3333	10.1319	55.3333	11.1589			55.3333	5.64154	55.3333	11.7573	55.3333	20.206
55.4167	5.24641													56.25	4.95306	55.4167	10.9068	55.4167	6.69324					55.4167	4.97494	55.4167	4.64561	55.4167	11.7801	56.75	8.6116			56	5.69466			55.4167	10.0092	55.4167	11.1652			55.4167	5.65374	55.4167	11.7935	55.4167	20.1712
55.5	5.25042													56.3333	4.953	55.5	10.9347	55.5	6.71406					55.5	4.98168	55.5	4.59618	55.5	11.8013	56.8333	8.64331			56.0833	5.69058			55.5	9.95725	55.5	11.1499			55.5	5.64491	55.5	11.8297	55.5	20.1805
55.5833	5.2514													56.4167	4.97129	55.5833	10.9904	55.5833	6.71688					55.5833	4.99858	55.5833	4.56207	55.5833	11.7931	56.9167	8.66305			56.1667	5.67068			55.5833	9.92734	55.5833	11.1348			55.5833	5.62305	55.5833	11.8124	55.5833	20.1476
55.6667	5.24986													56.5	4.95625	55.6667	11.011	55.6667	6.71091					55.6667	5.00429	55.6667	4.59	55.6667	11.806	57	8.69409			56.25	5.68872			55.6667	9.92049	55.6667	11.1348			55.6667	5.61002	55.6667	11.822	55.6667	20.1575
55.75	5.24348													56.5833	4.96541	55.75	11.0134	55.75	6.69918					55.75	5.01042	55.75	4.61025	55.75	11.8152	57.0833	8.67799			56.3333	5.73773			55.75	9.96417	55.75	11.1313			55.75	5.61763	55.75	11.8279	55.75	20.1988
55.8333	5.24419													56.6667	4.95861	55.8333	11.0071	55.8333	6.70377					55.8333	5.00842	55.8333	4.6549	55.8333	11.8242	57.1667	8.7018			56.4167	5.69853			55.8333	9.91837	55.8333	11.1672			55.8333	5.64604	55.8333	11.8365	55.8333	20.2437
55.9167	5.23784													56.75	4.96025	55.9167	11.0082	55.9167	6.71141					55.9167	5.01153	55.9167	4.60233	55.9167	11.8266	57.25	8.70975			56.5	5.66156			55.9167	9.90542	55.9167	11.1789			55.9167	5.67011	55.9167	11.82	55.9167	20.2342
56	5.2302													56.8333	4.93409	56	10.9947	56	6.70791					56	4.99259	56	4.5724	56	11.7932	57.3333	8.70426			56.5833	5.60518			56	9.91158	56	11.2			56	5.69828	56	11.8437	56	20.2128
56.0833	5.22886													56.9167	4.94238	56.0833	10.9743	56.0833	6.69107					56.0833	4.99345	56.0833	4.51334	56.0833	11.7657	57.4167	8.71113			56.6667	5.60795			56.0833	9.89373	56.0833	11.2048			56.0833	5.68184	56.0833	11.8657	56.0833	20.196
56.1667	5.22201													57	4.96114	56.1667	10.9184	56.1667	6.67371					56.1667	4.97891	56.1667	4.57871	56.1667	11.7622	57.5	8.71502			56.75	5.63237			56.1667	9.95364	56.1667	11.1914			56.1667	5.69985	56.1667	11.874	56.1667	20.265
56.25	5.23906													57.0833	4.97215	56.25	10.9304	56.25	6.6733					56.25	4.99368	56.25	4.60857	56.25	11.7864	57.5833	8.7041			56.8333	5.65858			56.25	9.86639	56.25	11.1988			56.25	5.69887	56.25	11.8362	56.25	20.2821
56.3333	5.24055													57.1667	4.96979	56.3333	10.9345	56.3333	6.69454					56.3333	5.00498	56.3333	4.67888	56.3333	11.8011	57.6667	8.70051			56.9167	5.61726			56.3333	9.84125	56.3333	11.1939			56.3333	5.68683	56.3333	11.8368	56.3333	20.2677
56.4167	5.24627													57.25	4.94921	56.4167	10.9681	56.4167	6.71191					56.4167	5.00476	56.4167	4.70484	56.4167	11.8079	57.75	8.68096			57	5.59514			56.4167	9.84029	56.4167	11.2078			56.4167	5.69218	56.4167	11.824	56.4167	20.2267
56.5	5.22897													57.3333	4.95167	56.5	10.9491	56.5	6.74194					56.5	4.99944	56.5	4.78739	56.5	11.7941	57.8333	8.70835			57.0833	5.56265			56.5	9.93644	56.5	11.1827			56.5	5.67155	56.5	11.8452	56.5	20.2412
56.5833	5.22875													57.4167	4.93072	56.5833	10.9533	56.5833	6.72731					56.5833	4.99187	56.5833	4.75277	56.5833	11.8082	57.9167	8.71675			57.1667	5.56522			56.5833	10.0196	56.5833	11.2203			56.5833	5.68033	56.5833	11.8276	56.5833	20.2772
56.6667	5.23432													57.5	4.94082	56.6667	10.9658	56.6667	6.73173					56.6667	5.00636	56.6667	4.79037	56.6667	11.8286	58	8.71601			57.25	5.57461			56.6667	9.9944	56.6667	11.1776			56.6667	5.68045	56.6667	11.8494	56.6667	20.3107
56.75	5.24706													57.5833	4.9443	56.75	10.9803	56.75	6.73424					56.75	5.00697	56.75	4.74789	56.75	11.8377	58.0833	8.68829			57.3333	5.57977			56.75	9.9773	56.75	11.1926			56.75	5.68135	56.75	11.8685	56.75	20.3332
56.8333	5.25351													57.6667	4.97264	56.8333	10.9882	56.8333	6.75187					56.8333	4.97728	56.8333	4.78404	56.8333	11.8123	58.1667	8.67515			57.4167	5.595			56.8333	10.054	56.8333	11.0997			56.8333	5.67616	56.8333	11.91	56.8333	20.362
56.9167	5.24807													57.75	4.93609	56.9167	10.9721	56.9167	6.74523					56.9167	4.95542	56.9167	4.83957	56.9167	11.7733	58.25	8.6707			57.5	5.5503			56.9167	10.2342	56.9167	11.0917			56.9167	5.66913	56.9167	11.8845	56.9167	20.3556
57	5.2454													57.8333	4.92283	57	10.9474	57	6.73404					57	4.96652	57	4.8515	57	11.7559	58.3333	8.64211			57.5833	5.52907			57	10.3341	57	11.0601			57	5.6576	57	11.8667	57	20.3365
57.0833	5.22875													57.9167	4.89902	57.0833	10.9144	57.0833	6.72794					57.0833	4.9763	57.0833	4.9042	57.0833	11.76	58.4167	8.60859			57.6667	5.54149			57.0833	10.2559	57.0833	11.0411			57.0833	5.67491	57.0833	11.8473	57.0833	20.3202
57.1667	5.23392													58	4.94575	57.1667	10.8978	57.1667	6.71391					57.1667	4.95535	57.1667	4.93011	57.1667	11.7947	58.5	8.60305			57.75	5.58933			57.1667	10.0423	57.1667	11.066			57.1667	5.65453	57.1667	11.8702	57.1667	20.3223
57.25	5.22581													58.0833	4.95089	57.25	10.9034	57.25	6.71068					57.25	4.92513	57.25	4.92429	57.25	11.7924	58.5833	8.62026			57.8333	5.60681			57.25	10.0592	57.25	11.0923			57.25	5.68184	57.25	11.8825	57.25	20.3958
57.3333	5.23774													58.1667	4.98213	57.3333	10.9106	57.3333	6.70019					57.3333	4.95166	57.3333	4.91054	57.3333	11.8233	58.6667	8.62791			57.9167	5.60468			57.3333	10.0505	57.3333	11.1296			57.3333	5.70322	57.3333	11.9192	57.3333	20.4159
57.4167	5.24789													58.25	4.95173	57.4167	10.9128	57.4167	6.72379					57.4167	4.95358	57.4167	4.86189	57.4167	11.8261	58.75	8.63637			58	5.59207			57.4167	10.1513	57.4167	11.0946			57.4167	5.67502	57.4167	11.919	57.4167	20.4554
57.5	5.26018													58.3333	4.96628	57.5	10.8788	57.5	6.73718					57.5	4.96369	57.5	4.89577	57.5	11.8271	58.8333	8.64569			58.0833	5.60685			57.5	10.0719	57.5	11.0943			57.5	5.65411	57.5	11.9139	57.5	20.4069
57.5833	5.24812													58.4167	4.95348	57.5833	10.886	57.5833	6.75601					57.5833	4.90999	57.5833	4.8779	57.5833	11.8113	58.9167	8.68818			58.1667	5.6045			57.5833	10.0681	57.5833	11.1161			57.5833	5.60796	57.5833	11.9163	57.5833	20.4178
57.6667	5.23602													58.5	4.982	57.6667	10.8947	57.6667	6.73227					57.6667	4.92006	57.6667	4.8625	57.6667	11.8007	59	8.68833			58.25	5.65122			57.6667	9.90103	57.6667	11.1223			57.6667	5.66454	57.6667	11.9023	57.6667	20.4152
57.75	5.22692													58.5833	4.9815	57.75	10.8738	57.75	6.7209					57.75	4.8964	57.75	4.83474	57.75	11.8159	59.0833	8.69993			58.3333	5.62181			57.75	9.90136	57.75	11.0907			57.75	5.67648	57.75	11.9489	57.75	20.4277
57.8333	5.23945													58.6667	4.98682	57.8333	10.8641	57.8333	6.717					57.8333	4.89189	57.8333	4.85437	57.8333	11.8316	59.1667	8.68059			58.4167	5.69746			57.8333	9.87149	57.8333	11.0645			57.8333	5.6973	57.8333	11.9337	57.8333	20.3606
57.9167	5.24169													58.75	4.99606	57.9167	10.8616	57.9167	6.75404					57.9167	4.89624	57.9167	4.8583	57.9167	11.8516	59.25	8.65558			58.5	5.68842			57.9167	9.89967	57.9167	11.0508			57.9167	5.67768	57.9167	12.0187	57.9167	20.3593
58	5.22932													58.8333	4.99246	58	10.9087	58	6.75675					58	4.92651	58	4.85501	58	11.8479	59.3333	8.67019			58.5833	5.72526			58	9.85821	58	11.0356			58	5.69929	58	11.9816	58	20.2981
58.0833	5.20186													58.9167	5.00118	58.0833	10.8894	58.0833	6.74535					58.0833	4.92737	58.0833	4.87302	58.0833	11.8449	59.4167	8.71453			58.6667	5.64375			58.0833	9.85939	58.0833	11.024			58.0833	5.72634	58.0833	11.9786	58.0833	20.3012
58.1667	5.18582													59	4.99748	58.1667	10.8588	58.1667	6.71326					58.1667	4.93707	58.1667	4.83763	58.1667	11.8308	59.5	8.7828			58.75	5.62488			58.1667	9.85071	58.1667	10.9847			58.1667	5.74369	58.1667	11.9244	58.1667	20.2744
58.25	5.17661													59.0833	5.00059	58.25	10.8341	58.25	6.7049					58.25	4.93022	58.25	4.91395	58.25	11.8155	59.5833	8.77142			58.8333	5.63512			58.25	9.84946	58.25	11.0289			58.25	5.75972	58.25	11.9273	58.25	20.2315
58.3333	5.18938													59.1667	4.99127	58.3333	10.8377	58.3333	6.70812					58.3333	4.91965	58.3333	4.89563	58.3333	11.8053					58.9167	5.65925			58.3333	9.9079	58.3333	10.9734			58.3333	5.74897	58.3333	11.9764	58.3333	20.23
58.4167	5.19173													59.25	5.00606	58.4167	10.8851	58.4167	6.70855					58.4167	4.91839	58.4167	4.90217	58.4167	11.8097					59	5.64908			58.4167	9.84356	58.4167	11.0904			58.4167	5.7381	58.4167	12.0241	58.4167	20.2417
58.5	5.21065													59.3333	5.00636	58.5	10.8857	58.5	6.7124					58.5	4.85845	58.5	4.72605	58.5	11.8087					59.0833	5.61611			58.5	9.81884	58.5	11.0779			58.5	5.70344	58.5	12.0195	58.5	20.2778
58.5833	5.21311													59.4167	5.00651	58.5833	10.8957	58.5833	6.70653					58.5833	4.90087	58.5833	4.67523	58.5833	11.7889					59.1667	5.60506			58.5833	9.73814	58.5833	11.0793			58.5833	5.67053	58.5833	11.9868	58.5833	20.2828
58.6667	5.20914													59.5	4.99837	58.6667	10.8889	58.6667	6.69948					58.6667	4.89169	58.6667	4.6904	58.6667	11.7812					59.25	5.61531			58.6667	9.87819	58.6667	11.0097			58.6667	5.64324	58.6667	11.9585	58.6667	20.3079
58.75	5.18755													59.5833	4.99694	58.75	10.9102	58.75	6.70099					58.75	4.94074	58.75	4.7023	58.75	11.7782					59.3333	5.62344			58.75	9.88517	58.75	11.0731			58.75	5.63658	58.75	11.9697	58.75	20.3596
58.8333	5.18618													59.6667	4.9941	58.8333	10.8974	58.8333	6.70186					58.8333	4.92698	58.8333	4.73439	58.8333	11.7945					59.4167	5.63432			58.8333	9.88269	58.8333	11.1741			58.8333	5.65943	58.8333	11.9466	58.8333	20.4376
58.9167	5.19412													59.75	4.98198	58.9167	10.8877	58.9167	6.70444					58.9167	4.90597	58.9167	4.86753	58.9167	11.7913					59.5	5.59983			58.9167	9.74761	58.9167	11.203			58.9167	5.66478	58.9167	11.9271	58.9167	20.4068
59	5.21275													59.8333	4.96394	59	10.8794	59	6.6995					59	4.88752	59	4.9138	59	11.7955					59.5833	5.62019			59	9.84864	59	11.2094			59	5.72647	59	11.9214	59	20.3831
59.0833	5.20819													59.9167	4.96124	59.0833	10.895	59.0833	6.70752					59.0833	4.88496	59.0833	4.93915	59.0833	11.7968					59.6667	5.63882			59.0833	9.89522	59.0833	11.2224			59.0833	5.74588	59.0833	11.9086	59.0833	20.3569
59.1667	5.2003															59.1667	10.9133	59.1667	6.70827					59.1667	4.90115	59.1667	4.87774	59.1667	11.7903									59.1667	9.9131	59.1667	11.2368			59.1667	5.75358	59.1667	11.9299	59.1667	20.3182
59.25	5.19144															59.25	10.9491	59.25	6.71844					59.25	4.91392	59.25	4.87295	59.25	11.7773									59.25	9.82051	59.25	11.2076			59.25	5.70251	59.25	11.9415	59.25	20.3279
59.3333	5.20195															59.3333	10.9248	59.3333	6.70228					59.3333	4.9516	59.3333	4.88478	59.3333	11.7839									59.3333	9.80452	59.3333	11.1597			59.3333	5.65427	59.3333	12	59.3333	20.2869
59.4167	5.20227															59.4167	10.9196	59.4167	6.69637					59.4167	4.9696	59.4167	4.88482	59.4167	11.7941									59.4167	9.81349	59.4167	11.1421			59.4167	5.68375	59.4167	11.9784	59.4167	20.2761
59.5	5.19768															59.5	10.8695	59.5	6.68208					59.5	4.96764	59.5	4.90799	59.5	11.8091									59.5	9.83751	59.5	11.122			59.5	5.67548	59.5	11.9639	59.5	20.2725
59.5833	5.1923															59.5833	10.8891	59.5833	6.69412					59.5833	4.95247	59.5833	4.91564	59.5833	11.8091									59.5833	9.82524	59.5833	11.0996			59.5833	5.66761	59.5833	11.9236	59.5833	20.2749
59.6667	5.20538															59.6667	10.8816	59.6667	6.69765					59.6667	4.91969	59.6667	4.84699											59.6667	9.81089	59.6667	11.0561			59.6667	5.63852	59.6667	11.9323	59.6667	20.304
59.75	5.21364															59.75	10.9073	59.75	6.71031					59.75	4.89588	59.75	4.80845											59.75	9.8001	59.75	11.0789					59.75	11.9349	59.75	20.3114
59.8333	5.21665															59.8333	10.8977	59.8333	6.716					59.8333	4.86734	59.8333	4.79516											59.8333	9.89959	59.8333	11.1169					59.8333	11.9551	59.8333	20.3393
																59.9167	10.9009							59.9167	4.88449	59.9167	4.85552											59.9167	9.86494	59.9167	11.1682					59.9167	11.9819	59.9167	20.4102
																60	10.9056							60	4.91329	60	4.87887											60	9.89655	60	11.2243					60	11.9936	60	20.4422
[truncated: 2 more columns]

## Sheet: 2C
time (min)	3	5	7	9	11	13	15	17	19	21	23	25	27	29	31	33	35	37	39	41	43	45	47	49	51	53	55	57	59
velocity (nm/s)	0.753407	-1.84758	-1.83491	-1.51978	-1.1116	-0.396783	-0.394478	-1.91626	-0.45794	-2.05699	-1.592	-0.425409	-2.05272	-1.11247	-1.23018	-1.2704	-1.2704	-2.01513	-0.441029	-1.15804	-0.826654	-0.329944	-2.33271	-0.834926	-1.0944	-0.869705	-1.7141	-1.39197	-0.099089
	1.48824	2.0535	-0.770004	1.20941	0.313041	-0.059821	0.592033	-0.239818	-0.324354	-0.789325	-0.79013	-0.128936	-0.536418	-1.054	0.28973	-0.100976	-0.100976	-1.63928	-0.381364	-0.359586	-0.227685	-0.079365	-0.982864	-0.782678	-0.577758	-0.294481	-0.881644	-1.1744	-0.030953
	2.26748	2.41866	0.899753	1.38599	0.666593	0.169766	1.57574	-0.051381	-0.218543	0.053757	-0.396517	0.158877	-0.530432	-0.713684	0.301895	0.135398	0.135398	-0.823558	-0.207237	-0.349988	-0.00578	0.083259	-0.531485	-0.778601	0.003701	-0.076408	-0.870295	-0.948859	-0.020884
	2.90376	2.49697	1.32877	1.78722	1.69059	0.580594	2.00169	0.098697	0.319268	0.071835	-0.196393	0.36689	0.343401	-0.28511	0.325232	0.162177	0.162177	-0.746429	0.06661	-0.268495	0.000387	0.101206	-0.3493	-0.540447	0.120099	0.069444	-0.238154	-0.815526	0.0039
	3.24924	3.19618	1.48597	2.14379	2.05745	1.63227	2.10294	0.389931	0.354999	1.10063	0.308161	0.642151	0.78177	-0.266479	0.580313	0.17213	0.17213	0.265724	0.080245	0.051987	0.095034	0.132141	-0.220612	-0.484856	0.218013	0.216038	-0.073343	-0.406336	0.354968
	3.85709	3.30658	2.65889	2.50642	3.15303	2.35981	2.24903	0.563869	1.08212	1.11201	0.310315	0.703159	0.919457	0.155937	0.688779	0.225603	0.225603	0.550326	0.157751	0.063947	0.155922	0.186075	-0.093913	-0.455386	0.282327	0.275107	-0.037546	-0.168521	0.412577
	7.58442	3.65775	5.11502	4.21309	3.32138	2.39106	2.4314	0.702813	1.29908	1.34871	0.721062	0.935678	0.936753	0.431106	0.908546	0.287457	0.287457	0.589975	0.158817	0.113598	0.272992	0.264333	0.004946	-0.176179	0.316547	0.368083	-0.026104	-0.147269	0.754351
	8.95317	3.71265	5.49899	4.26669	3.51799	3.61661	2.46279	0.7794	1.44408	2.20276	0.989342	1.21054	1.10424	0.691701	0.909256	0.331573	0.331573	0.652927	0.808276	0.276125	0.373967	0.285289	0.094247	-0.143172	0.337398	0.570252	-0.010587	0.043484	1.23871
	9.23635	6.31927	6.18425	4.31931	3.72064	3.74135	3.14725	0.791275	1.53978	2.45296	1.94208	1.6462	1.141	0.73317	0.911011	0.625406	0.625406	0.832706	0.930185	0.514772	0.407389	0.943942	0.508413	-0.001275	0.466507	0.659747	0.083937	0.31462	1.31149
	10.6161	6.35694	8.16926	4.86544	4.16115	3.94482	3.16279	0.906151	1.58136	2.70663	2.30805	1.77359	1.14898	1.32199	1.02209	0.69989	0.69989	1.07238	1.04096	0.814696	0.454805	0.991875	0.773625	0.089532	0.742677	0.664591	0.09516	0.318549
	10.9512	7.30422	8.43759	5.25324	4.3012	4.43475	3.55441	1.11903	1.92426	2.98742	2.85156	1.86389	1.54381	1.42048	1.09067	0.748169	0.748169	1.09318	1.16617	0.829945	0.479053	1.27966	0.802177	0.116206	0.826542	0.805065	0.232054	0.38757
	12.6052	7.88002	8.68199	6.41962	5.91301	5.97732	3.65017	1.71207	1.95917	3.07792	2.95268	2.56628	1.95374	2.3028	1.90478	1.12204	1.12204	1.14874	1.40397	0.929081	0.482872	1.29444	0.897168	0.30446	1.28065	1.10425	0.479509	0.438749
	12.7999	8.53312	9.01211	7.63722	6.32899	6.1896	4.09494	2.16917	2.2138	3.12206	3.31939	3.17737	2.68298	2.31977	2.69879	1.77594	1.77594	1.37233	1.51832	0.946885	0.597898	2.23435	1.65949	0.733225	1.32272	1.49941	0.63249	1.15581
	13.9187	9.51906	9.44666	7.88028	8.54761	6.30206	4.5807	2.1738	2.22968	3.40887	3.72675	3.41802	2.98303	2.52823	2.71448	2.22439	2.22439	1.55966	2.09452	1.80169	0.957577	2.73387	1.70641	0.883759	1.35102	1.6013	1.39512	1.48059
	15.9572	10.4301	9.58149	8.48487	10.1294	6.56617	4.7069	2.28158	2.36532	3.44967	4.57165	4.90783	3.22812	3.25635	3.19399	2.30751	2.30751	2.11016	2.46485	2.37414	2.05442	2.76645	1.74551	1.88712	1.55547	4.31295	1.8375	1.5477
	17.7495	10.918	11.6384	8.53807	10.2516	6.63754	5.48713	2.77709	3.08635	4.78062	4.60298	5.14382	3.7379	3.63022	3.9604	2.57014	2.57014	2.14442	2.99307	3.68592	3.77702	2.91678	1.96748	3.54994	1.88236	12.6889	1.86194	2.51927
		12.3117	12.066	9.53	10.8779	7.69294	5.69135	2.91864	3.77979	5.95278	5.96073	6.65899	4.36562	3.9114	6.00336	2.84974	2.84974	2.40526	5.54589	4.66864	4.20443	5.30963	7.72437	4.94792	4.2074
		13.2469	12.3381	9.71804	11.3633	9.6271	7.63066	2.97589	5.27587	7.63611	6.35853	6.66711	4.65285	4.24497	6.39505	3.30562	3.30562	2.81279	5.56404	5.27513	6.71932	8.97456	8.76347	5.05242	11.2353
		13.8581	12.4504	9.80885	12.3586	11.3313	8.02932	3.00351	7.14171	8.37742	6.49158	6.74383	6.71345	4.72822	6.88876	3.49146	3.49146	6.53982
		14.8064	12.5397	11.1357	12.4223	11.4211	8.66257	3.25357	7.77126	9.5616	7.78676	7.39951	6.71373	4.77208	6.91653	3.74639	3.74639
		16.728	13.1872	11.4072	12.7773	12.7795	8.6965	4.99219	7.89619	9.76332	8.65113	9.30906	7.44588	8.51655	8.30914	4.26502	4.26502
		17.0202	14.6011	11.8461	12.8173	14.7981	9.55932	5.43501	7.89914	10.3782	8.76943		7.56014	9.83352		5.66816	5.66816
			15.7045	13.0191	14.3091	15.2616	9.6904	5.48196	8.34699	10.6747	10.9258		9.69695
				15.6555	15.1896	15.8616	9.98473	10.396	10.941
				16.7488		17.7765	10.5948	20.2532	14.9228
median velocity (nm/s)	9.09476	7.59212	8.68199	7.63722	6.121	6.1896	4.09494	2.16917	2.2138	3.07792	2.95268	1.86389	1.95374	1.86164	1.05638	1.12204	1.01469	1.08278	0.985571	0.664734	0.431097	0.967909	0.641019	0.044129	0.604592	0.614999	0.036675	0.179052	0.354968

## Sheet: 2D
time (min)	3	5	7	9	11	13	15	17	19	21	23	25	27	29	31	33	35	37	39	41	43	45	47	49	51	53	55	57	59
intensity (a.u.)	-0.08091	-0.118124	-0.0444621	0.0571737	-0.26	-0.181006	0.180834	-0.0412456	0.188283	0.2354	0.0932414	0.45661	0.098184	0.212893	-0.0063748	-0.178057	-0.178057	-0.19815	0.587034	0.502047	0.449266	0.535748	0.395136	0.230513	0.298701	0.370576	0.388899	0.536229	0.495926
	0.0277461	-0.0351233	0.0039176	0.0709302	-0.00743142	0.20262	0.207455	0.289055	0.229126	0.370486	0.333538	0.469654	0.520285	0.243969	0.173515	-0.137742	-0.137742	0.726179	0.649428	0.528208	0.79399	0.800424	0.737872	0.459533	0.524439	0.585766	0.518026	0.580186	0.77835
	0.0295479	0.0624782	0.077174	0.104166	0.0678975	0.218271	0.236534	0.346426	0.351922	0.546818	0.460756	0.475304	0.609974	0.543314	0.567914	0.601327	0.601327	0.742824	1.32311	0.879515	0.864597	0.824595	0.756241	0.639018	0.675153	0.89125	1.33727	1.32449	1.25641
	0.0340015	0.0742684	0.110268	0.12636	0.116157	0.222974	0.24199	0.361051	0.550958	0.581272	0.604348	0.695859	0.630446	0.7514	0.794902	0.759424	0.759424	1.31324	1.39276	1.21085	0.915882	1.04987	0.855741	0.811172	0.857309	1.80047	2.05328	1.89424	2.25344
	0.145398	0.114266	0.149777	0.164613	0.125241	0.231611	0.266501	0.381417	0.583966	0.741417	0.767224	0.719891	0.741715	0.887744	0.883681	0.883799	0.883799	1.42497	1.54213	1.24595	1.48722	1.47636	1.44824	0.831866	0.911204	1.91943	2.09257	1.91283	2.46332
	0.197297	0.162241	0.177524	0.173505	0.139696	0.25851	0.267412	0.422013	0.592813	0.793727	0.777921	0.735621	0.867931	0.894178	0.902279	0.990538	0.990538	1.58032	1.58156	1.54063	1.79448	1.78165	1.71301	1.51761	1.73076	2.16474	2.15164	2.20503	2.67276
	0.22133	0.163601	0.197828	0.204189	0.141365	0.269641	0.363852	0.449928	0.652745	0.8128	0.902192	0.813711	0.914363	1.01673	1.12427	1.10095	1.10095	1.6963	1.6248	1.62538	1.82048	1.89806	1.79449	1.79485	1.88513	2.34573	2.40179	2.23099	2.9883
	0.28973	0.204406	0.252467	0.216327	0.178238	0.272234	0.397008	0.457118	0.729227	0.853499	0.946838	0.922274	0.952458	1.16113	1.15087	1.11416	1.11416	1.73388	1.86821	1.65957	1.96021	1.99381	1.81806	1.85574	1.90778	2.43693	2.48694	2.33532	3.63142
	0.294578	0.208733	0.26535	0.217097	0.227366	0.309976	0.409175	0.496327	0.784293	0.898706	1.00112	1.30518	0.981291	1.17878	1.21586	1.93865	1.93865	2.07352	1.91328	1.99233	1.97161	2.13938	1.98935	2.02112	2.2927	2.61996	2.65557	2.41149	3.75988
	0.417087	0.236899	0.276794	0.237157	0.234533	0.337938	0.430906	0.541859	0.806684	0.965619	1.04771	1.30742	1.34593	1.43061	2.11441	2.24424	2.24424	2.40253	2.68036	2.44141	2.46233	2.30811	2.12607	2.09377	2.33781	2.81131	2.90062	2.79991
	0.471245	0.237967	0.300004	0.276191	0.292274	0.339728	0.45883	0.654683	0.824083	1.02364	1.0666	1.39826	1.42951	1.4734	2.32856	2.59939	2.59939	2.95877	3.01872	2.73746	2.56891	2.61161	2.42156	2.45858	2.55938	3.0216	3.01813	2.97652
	0.487631	0.274055	0.327443	0.281289	0.365871	0.435632	0.482633	0.688496	0.875307	1.07064	1.09969	1.69367	1.51704	1.69327	2.47893	2.72059	2.72059	3.01269	3.1206	2.93344	2.58253	2.66812	2.42597	2.69406	2.70281	3.16471	3.24997	3.02646
	0.494569	0.294154	0.329998	0.282176	0.381266	0.456161	0.552985	0.831494	1.04279	1.17921	1.31432	1.75284	1.73097	1.95102	2.52854	2.73477	2.73477	3.3324	3.25117	3.20454	3.53875	3.39365	2.87519	3.17565	3.38297	3.42406	3.80947	3.53446
	0.509792	0.332752	0.350655	0.288264	0.434351	0.565888	0.610128	0.945986	1.05164	1.28215	1.40367	1.92982	1.95418	2.20129	2.6487	2.80771	2.80771	3.59958	3.30716	3.43835	4.13648	4.55851	3.83357	3.71254	3.82447	3.83878	3.87591	3.86405
	0.733976	0.364931	0.354287	0.302832	0.578107	0.568984	0.643822	0.990464	1.08582	1.45786	1.50041	2.11517	1.96179	2.61598	2.66413	3.027	3.027	3.71414	3.95138	4.37047	4.51184	4.98105	4.70905	3.98431	3.90889	4.4975	4.86994	4.50361
	1.00995	0.440087	0.412195	0.317905	0.59187	0.573097	0.673989	1.09607	1.1402	1.50281	1.53259	2.44595	2.01775	2.6866	2.98266	3.03864	3.03864	3.71593	4.24603	4.43666	4.99408	5.24585	4.89501	4.88465	4.59796	7.09669	7.53835	8.10528
		0.452038	0.419063	0.330158	0.665945	0.619438	0.688777	1.16442	1.15586	1.56503	1.53936	2.64287	2.1092	3.16921	3.13683	3.04999	3.04999	3.92989	4.86923	5.04591	5.41171	5.96926	5.01886	5.56695	5.30452
		0.465777	0.430532	0.393327	0.736719	0.670928	0.692772	1.16553	1.4945	1.61976	1.86624	2.98971	3.20783	3.38118	3.51299	3.07111	3.07111	4.66658	6.18154	6.68209	7.24513	6.67558	6.36476	5.67142	6.3745
		0.516414	0.47655	0.645232	0.803215	0.672722	0.838539	1.23298	1.49797	1.72648	2.48346	3.00996	3.26229	3.53588	3.84436	3.11592	3.11592	5.45956
		0.558416	0.476633	0.66804	0.85379	0.751486	0.979988	1.29963	1.5648	1.82415	2.50823	3.12809	3.45246	3.85168	4.73176	3.12351	3.12351
		0.667143	0.908189	0.702053	1.07528	1.09003	1.18946	1.42315	1.56632	2.53563	2.66265	4.06326	3.46292	4.04274	4.96453	3.96317	3.96317
		0.985992	1.20711	0.847215	1.23939	1.14234	1.19785	1.50509	1.62873	2.58708	2.85829		3.65517	4.57837		5.14852	5.14852
			1.52751	1.11645	1.59446	1.20078	1.51853	1.56224	1.9781	2.87497	3.20554		3.88255
				1.36906	1.70984	1.4968	1.55677	1.82694	2.12796
				1.8354		1.83707	1.77113	2.30177	2.56632
median intensity (a.u.)	0.292154	0.256011	0.327443	0.282176	0.373568	0.456161	0.552985	0.831494	1.04279	1.07064	1.09969	1.39826	1.51704	1.58334	2.32856	2.65999	2.65999	2.40253	2.29682	2.21687	2.21697	2.22375	2.05771	2.05744	2.31526	2.52845	2.57126	2.37341	2.46332

## Sheet: 2E
velocity (nm/s)	ntensity (a.u.)
-2.33271	1.98935
-2.05699	0.793727
-2.05272	0.981291
-2.01513	1.31324
-1.91626	0.457118
-1.84758	0.204406
-1.83491	0.419063
-1.7141	0.388899
-1.63928	2.40253
-1.592	1.31432
-1.51978	0.0709302
-1.39197	2.23099
-1.2704	1.11416
-1.23018	-0.0063748
-1.1744	3.02646
-1.15804	2.73746
-1.11247	2.61598
-1.1116	0.59187
-1.0944	0.298701
-1.054	3.85168
-0.982864	0.756241
-0.948859	2.79991
-0.881644	0.518026
-0.870295	3.87591
-0.869705	2.61996
-0.834926	0.811172
-0.826654	4.51184
-0.823558	0.742824
-0.815526	2.33532
-0.79013	0.777921
-0.789325	0.8128
-0.782678	5.67142
-0.778601	4.88465
-0.770004	0.412195
-0.746429	4.66658
-0.713684	2.6866
-0.577758	3.90889
-0.540447	2.69406
-0.536418	0.741715
-0.531485	1.71301
-0.530432	3.88255
-0.484856	1.85574
-0.45794	0.875307
-0.455386	0.459533
-0.441029	0.649428
-0.425409	0.922274
-0.406336	0.536229
-0.400406	5.04535
-0.396783	1.20078
-0.396517	0.767224
-0.394478	0.552985
-0.381364	3.1206
-0.359586	2.44141
-0.349988	6.68209
-0.3493	5.01886
-0.329944	5.24585
-0.324354	0.806684
-0.294481	3.83878
-0.28511	0.212893
-0.268495	1.62538
-0.266479	1.4734
-0.239818	0.831494
-0.238154	2.15164
-0.227685	0.449266
-0.224744	3.37349
-0.220612	2.87519
-0.218543	0.784293
-0.207237	1.86821
-0.196393	1.04771
-0.176179	1.51761
-0.168521	3.86405
-0.147269	1.89424
-0.143172	2.45858
-0.128936	1.92982
-0.100976	0.601327
-0.099089	3.75988
-0.093913	2.42597
-0.079365	0.824595
-0.076408	2.43693
-0.073343	3.01813
-0.059821	0.670928
-0.051381	0.688496
-0.037546	2.65557
-0.030953	2.67276
-0.026104	2.40179
-0.020884	3.63142
-0.010587	3.80947
-0.00578	5.41171
-0.001275	3.71254
0.000387	4.99408
0.003701	6.3745
0.0039	0.77835
0.004946	2.12607
0.042909	1.33899
0.043484	8.10528
0.051987	0.528208
0.053757	0.741417
0.063947	5.04591
0.06661	4.86923
0.069444	7.09669
0.071835	0.898706
0.080245	3.95138
0.083259	5.96926
0.083937	2.48694
0.089532	2.02112
0.094247	2.42156
0.095034	2.58253
0.09516	7.53835
0.098697	1.23298
0.101206	1.99381
0.113598	1.24595
0.116206	3.17565
0.120099	3.82447
0.132141	4.98105
0.135398	2.80771
0.155922	4.13648
0.155937	3.53588
0.157751	4.24603
0.158817	1.91328
0.158877	0.695859
0.162177	2.59939
0.169766	0.672722
0.17213	3.027
0.186075	0.800424
0.216038	2.16474
0.218013	2.55938
0.225603	5.14852
0.232054	2.05328
0.264333	4.55851
0.265724	3.01269
0.272992	2.46233
0.275107	0.585766
0.276125	4.43666
0.282327	5.30452
0.285289	2.13938
0.287457	1.10095
0.28973	1.21586
0.301895	2.47893
0.30446	5.56695
0.308161	1.86624
0.310315	2.66265
0.313041	1.23939
0.31462	3.53446
0.316547	1.90778
0.318549	0.580186
0.319268	0.824083
0.32353	0.623209
0.325232	4.96453
0.331573	2.72059
0.336849	1.88841
0.337398	3.38297
0.343401	3.45246
0.354968	2.46332
0.354999	1.5648
0.36689	2.64287
0.368083	4.4975
0.373967	1.97161
0.383079	3.79805
0.38757	2.20503
0.389931	0.422013
0.407389	1.96021
0.410299	2.92579
0.412577	2.9883
0.431106	4.57837
0.438749	1.91283
0.454805	3.53875
0.466507	2.70281
0.479053	1.82048
0.479509	3.24997
0.482872	0.915882
0.508413	6.36476
0.514772	4.37047
0.548757	3.26906
0.550326	3.59958
0.563869	1.42315
0.570252	2.81131
0.580313	2.32856
0.580594	0.619438
0.589975	1.58032
0.592033	0.482633
0.597898	0.79399
0.625406	-0.137742
0.63249	4.86994
0.642151	1.30518
0.644273	3.45667
0.652927	1.73388
0.659747	1.91943
0.664591	3.0216
0.666593	1.07528
0.688779	1.12427
0.691701	1.69327
0.696177	3.77213
0.69989	3.07111
0.702813	1.82694
0.703159	1.39826
0.721062	0.946838
0.73317	0.887744
0.733225	3.98431
0.742677	2.2927
0.748169	3.12351
0.753407	1.00995
0.754351	1.25641
0.773625	4.89501
0.7794	0.496327
0.78177	2.01775
0.791275	1.16442
0.802177	0.855741
0.805065	3.42406
0.808276	3.01872
0.814696	3.43835
0.826542	0.675153
0.829945	1.99233
0.832706	3.92989
0.883759	0.831866
0.897168	3.83357
0.899753	0.430532
0.906151	0.990464
0.908546	3.13683
0.909256	0.902279
0.911011	4.73176
0.919457	1.73097
0.929081	3.20454
0.930185	1.54213
0.935678	1.69367
0.936753	3.20783
0.943942	2.66812
0.946885	1.65957
0.957577	1.79448
0.989342	3.20554
0.991875	1.78165
1.01469	1.31056
1.02209	3.51299
1.04096	1.58156
1.07238	3.71414
1.08212	1.04279
1.09067	2.52854
1.09318	5.45956
1.10063	2.87497
1.10424	1.34593
1.10425	2.34573
1.11201	2.58708
1.11903	1.56224
1.12204	2.24424
1.141	1.96179
1.14874	-0.19815
1.14898	2.1092
1.15581	4.50361
1.16617	6.18154
1.20941	0.216327
1.21054	2.44595
1.23871	2.25344
1.27966	3.39365
1.28065	1.88513
1.29444	1.89806
1.29908	1.05164
1.31149	0.495926
1.32199	4.04274
1.32272	1.73076
1.32877	0.276794
1.34871	1.61976
1.35102	0.911204
1.37233	1.42497
1.38599	0.217097
1.39512	2.09257
1.40397	3.30716
1.42048	3.16921
1.44408	0.583966
1.47926	-0.199991
1.48059	1.32449
1.48597	1.52751
1.48824	0.0277461
1.49941	1.80047
1.51832	2.68036
1.53978	1.62873
1.54381	0.520285
1.5477	2.41149
1.55547	2.33781
1.55966	3.71593
1.57574	0.430906
1.58136	2.56632
1.6013	3.16471
1.60833	2.89859
1.63227	0.231611
1.6462	2.98971
1.65949	0.737872
1.69059	0.0678975
1.70641	1.79449
1.71207	1.16553
1.74551	1.81806
1.77359	4.06326
1.77594	3.96317
1.7784	0.85267
1.78722	1.8354
1.80169	2.93344
1.8375	1.33727
1.86194	2.90062
1.86389	3.12809
1.88236	4.59796
1.88712	2.09377
1.90478	0.173515
1.92426	1.9781
1.94208	2.50823
1.95374	0.867931
1.95917	1.1402
1.96748	4.70905
2.00169	0.692772
2.0535	0.558416
2.05442	2.56891
2.05745	0.736719
2.09452	3.25117
2.10294	0.838539
2.11016	2.07352
2.14379	1.11645
2.14442	3.3324
2.16917	0.449928
2.1738	0.346426
2.20276	1.02364
2.2138	0.592813
2.22439	0.990538
2.22968	2.12796
2.23435	1.47636
2.24903	0.180834
2.26748	0.494569
2.28158	1.29963
2.3028	1.95102
2.30751	3.03864
2.30805	0.902192
2.31977	1.17878
2.34559	1.2012
2.35981	0.573097
2.36532	0.351922
2.37414	1.21085
2.39106	1.4968
2.40526	2.95877
2.41866	0.0624782
2.4314	1.55677
2.45296	1.45786
2.46279	0.267412
2.46485	1.39276
2.49697	0.985992
2.50642	0.276191
2.51927	2.97652
2.52823	1.16113
2.56628	3.00996
2.57014	0.759424
2.65889	0.300004
2.68298	0.098184
2.69879	2.6487
2.70663	0.2354
2.71448	3.84436
2.73387	2.61161
2.76645	6.67558
2.77709	0.381417
2.81279	0.726179
2.84974	3.04999
2.85156	1.50041
2.90376	0.197297
2.91678	1.04987
2.91864	0.541859
2.95268	2.48346
2.97589	0.654683
2.98303	0.914363
2.98742	2.53563
2.99307	1.32311
3.00351	2.30177
3.07792	1.28215
3.08635	1.4945
3.12206	0.965619
3.13754	0.945567
3.14725	1.18946
3.15303	0.125241
3.16279	1.19785
3.17737	2.11517
3.19399	2.66413
3.19618	0.364931
3.22812	3.46292
3.24924	0.733976
3.25357	0.361051
3.25635	3.38118
3.30562	3.11592
3.30658	0.162241
3.31939	1.09969
3.32138	0.803215
3.40887	1.82415
3.41802	1.75284
3.44967	1.17921
3.49146	1.93865
3.51799	1.59446
3.54994	0.639018
3.55441	1.77113
3.61661	0.456161
3.63022	2.20129
3.65017	0.409175
3.65775	-0.0351233
3.68592	0.879515
3.71265	0.0742684
3.72064	0.365871
3.72675	0.604348
3.7379	0.630446
3.74135	1.14234
3.74639	2.73477
3.77702	0.864597
3.77979	1.08582
3.79134	2.1101
3.85709	0.509792
3.9114	1.43061
3.94482	1.09003
3.9604	2.98266
4.09494	0.688777
4.16115	0.234533
4.20443	7.24513
4.2074	0.857309
4.21309	0.393327
4.24497	0.7514
4.26502	-0.178057
4.26669	0.847215
4.3012	0.292274
4.31295	0.89125
4.31931	0.645232
4.36562	1.51704
4.43475	0.568984
4.57165	2.85829
4.5807	0.24199
4.60298	1.53259
4.65285	3.26229
4.66864	0.502047
4.7069	1.51853
4.72822	0.543314
4.77208	0.894178
4.78062	1.72648
4.86544	0.302832
4.90783	0.813711
4.94792	0.230513
4.94811	2.84641
4.99219	1.50509
5.05242	1.79485
5.11502	0.0039176
5.12194	2.01596
5.14382	0.475304
5.25324	0.66804
5.27513	1.54063
5.27587	1.56632
5.30963	2.30811
5.43501	-0.0412456
5.48196	1.09607
5.48713	0.266501
5.49899	1.20711
5.54589	1.6248
5.56404	0.587034
5.66816	0.883799
5.69135	0.236534
5.91301	0.665945
5.95278	1.50281
5.96073	0.460756
5.97732	0.751486
6.00336	0.567914
6.18425	0.327443
6.1896	0.339728
6.30206	0.25851
6.31927	0.114266
6.32899	-0.26
6.35694	0.274055
6.35853	1.53936
6.39505	2.11441
6.41962	1.36906
6.49158	1.40367
6.53982	1.6963
6.56617	1.83707
6.63754	0.272234
6.65899	0.719891
6.66711	1.30742
6.71345	1.95418
6.71373	3.65517
6.71932	1.48722
6.74383	0.735621
6.88876	1.15087
6.91653	0.794902
7.14171	0.652745
7.30422	0.332752
7.39951	0.469654
7.44588	0.609974
7.56014	0.952458
7.58442	0.294578
7.63066	0.979988
7.63611	1.07064
7.63722	0.173505
7.69294	0.269641
7.72437	1.44824
7.77126	0.229126
7.78676	1.00112
7.88002	0.237967
7.88028	0.12636
7.89619	0.550958
7.89914	1.15586
8.02932	0.643822
8.16926	0.908189
8.30914	0.883681
8.34699	1.49797
8.37742	0.370486
8.43759	0.110268
8.48487	0.330158
8.51655	0.243969
8.53312	0.440087
8.53807	0.104166
8.54761	1.70984
8.65113	0.0932414
8.66257	0.45883
8.68199	0.26535
8.6965	0.673989
8.76347	0.395136
8.76943	0.333538
8.95317	0.417087
8.97456	0.535748
9.01211	0.197828
9.23635	0.471245
9.30906	0.45661
9.44666	0.47655
9.51906	0.452038
9.53	0.0571737
9.55932	0.207455
9.5616	0.546818
9.58149	0.354287
9.6271	0.218271
9.6904	0.610128
9.69695	1.42951
9.71804	0.282176
9.76332	1.56503
9.78059	2.13963
9.80885	0.164613
9.83352	1.01673
9.98473	0.363852
10.1294	0.139696
10.2516	0.381266
10.3782	0.853499
10.396	0.289055
10.4301	0.516414
10.5948	0.397008
10.6161	0.22133
10.6747	0.581272
10.8779	0.227366
10.918	0.208733
10.9258	1.0666
10.941	0.188283
10.9512	0.28973
11.1357	0.702053
11.2353	0.524439
11.3313	0.337938
11.3633	-0.00743142
11.4072	0.317905
11.4211	0.309976
11.6384	0.476633
11.8461	0.281289
12.066	0.252467
12.3117	-0.118124
12.3381	0.329998
12.3586	0.178238
12.4223	0.85379
12.4504	0.149777
12.5397	0.177524
12.6052	0.145398
12.6889	0.370576
12.7773	0.578107
12.7795	0.435632
12.7999	0.487631
12.8173	0.434351
13.0191	0.204189
13.1872	0.350655
13.2469	0.465777
13.8581	0.236899
13.9187	0.0295479
14.3091	0.116157
14.6011	0.077174
14.7981	0.565888
14.8064	0.163601
14.9228	0.729227
15.1896	0.141365
15.2616	0.20262
15.6555	0.237157
15.7045	-0.0444621
15.8616	0.222974
15.9572	-0.08091
16.728	0.667143
16.7488	0.288264
17.0202	0.294154
17.7495	0.0340015
17.7765	-0.181006
20.2532	0.945986

## Sheet: 2S1B
ky1		ky3		ky4		ky6		ky7		ky8		ky9		ky10		ky15		ky17		ky19		ky21		ky22		ky23		ky24		ky26		ky29		ky33		ky34		ky35		ky36		ky37		ky38		ky41		ky42
time (min)	position (µm)	time (min)	position (µm)	time (min)	position (µm)	time (min)	position (µm)	time (min)	position (µm)	time (min)	position (µm)	time (min)	position (µm)	time (min)	position (µm)	time (min)	position (µm)	time (min)	position (µm)	time (min)	position (µm)	time (min)	position (µm)	time (min)	position (µm)	time (min)	position (µm)	time (min)	position (µm)	time (min)	position (µm)	time (min)	position (µm)	time (min)	position (µm)	time (min)	position (µm)	time (min)	position (µm)	time (min)	position (µm)	time (min)	position (µm)	time (min)	position (µm)	time (min)	position (µm)	time (min)	position (µm)
0.75	0	0.25	0	0.666667	0	0.166667	0	0.916667	0	0.166667	0	2.66667	0	0.166667	0	0.166667	0	0.583333	0	0.166667	0	0.666667	0	0.666667	0	2.16667	0	1.83333	0	0.166667	0	0.166667	0	1.08333	0	1	0	0.583333	0	2.58333	0	0.166667	0	1.33333	0	4.25	0	0.166667	0
0.833333	0.094704	0.333333	0.099128	0.75	0.112606	0.25	0.090575	1	0.001933	0.25	0.022691	2.75	0.077023	0.25	0.007497	0.25	0.037154	0.666667	0.055714	0.25	0.071952	0.75	0.062	0.75	0.123436	2.25	0.095552	1.91667	0.126267	0.25	0.101294	0.25	0.036927	1.16667	0.145757	1.08333	0.083906	0.666667	0.05505	2.66667	0.086069	0.25	0.038757	1.41667	0.02836	4.33333	0.086837	0.25	0.084072
0.916667	0.151649	0.416667	0.117289	0.833333	0.193818	0.333333	0.245785	1.08333	0.003866	0.333333	0.057505	2.83333	0.164583	0.333333	0.041061	0.333333	0.08389	0.75	0.207258	0.333333	0.161954	0.833333	0.124875	0.833333	0.2129	2.33333	0.15156	2	0.190542	0.333333	0.20107	0.333333	0.082772	1.25	0.260887	1.16667	0.012029	0.75	0.017962	2.75	0.211017	0.333333	0.013358	1.5	0.024066	4.41667	0.090587	0.333333	0.168902
1	0.240218	0.5	0.114304	0.916667	0.245355	0.416667	0.233614	1.16667	0.005799	0.416667	0.101243	2.91667	0.278461	0.416667	0.109641	0.416667	0.097658	0.833333	0.360612	0.416667	0.21539	0.916667	0.19321	0.916667	0.26358	2.41667	0.187934	2.08333	0.298809	0.416667	0.248955	0.416667	0.032025	1.33333	0.39906	1.25	0.139549	0.833333	0.051973	2.83333	0.217293	0.416667	0.052335	1.58333	0.019772	4.5	0.071464	0.416667	0.27646
1.08333	0.282968	0.583333	0.118593	1	0.328086	0.5	0.365685	1.25	0.007732	0.5	0.140825	3	0.290729	0.5	0.121466	0.5	0.126877	0.916667	0.513965	0.5	0.261243	1	0.194715	1	0.30971	2.5	0.282299	2.16667	0.406142	0.5	0.27634	0.5	0.096069	1.41667	0.46657	1.33333	0.267069	0.916667	0.194742	2.91667	0.303469	0.5	0.020618	1.66667	0.049989	4.58333	0.10453	0.5	0.3806
1.16667	0.323696	0.666667	0.185097	1.08333	0.371512	0.583333	0.485552	1.33333	0.009665	0.583333	0.191569	3.08333	0.269702	0.583333	0.126217	0.583333	0.150468	1	0.552071	0.583333	0.310458	1.08333	0.239517	1.08333	0.361304	2.58333	0.361409	2.25	0.503761	0.583333	0.285828	0.583333	0.128346	1.5	0.581566	1.41667	0.39459	1	0.268623	3	0.339413	0.583333	0.178399	1.75	0.091094	4.66667	0.127582	0.583333	0.448236
1.25	0.346572	0.75	0.226661	1.16667	0.416541	0.666667	0.605418	1.41667	0.119556	0.666667	0.17487	3.16667	0.237004	0.666667	0.110733	0.666667	0.187219	1.08333	0.586326	0.666667	0.435927	1.16667	0.274739	1.16667	0.389549	2.66667	0.429129	2.33333	0.553867	0.666667	0.336736	0.666667	0.223304	1.58333	0.609719	1.5	0.52211	1.08333	0.397043	3.08333	0.452751	0.666667	0.336181	1.83333	0.122037	4.75	0.127251	0.666667	0.497652
1.33333	0.429394	0.833333	0.249132	1.25	0.437897	0.75	0.68394	1.5	0.179438	0.75	0.214328	3.25	0.24864	0.75	0.125087	0.75	0.213454	1.16667	0.598569	0.75	0.567743	1.25	0.339958	1.25	0.437594	2.75	0.463788	2.41667	0.585568	0.75	0.40703	0.75	0.276857	1.66667	0.643018	1.58333	0.645118	1.16667	0.397855	3.16667	0.488779	0.75	0.248014	1.91667	0.112567	4.83333	0.133295	0.75	0.562084
1.41667	0.543989	0.916667	0.259098	1.33333	0.516406	0.833333	0.792056	1.58333	0.255649	0.833333	0.151868	3.33333	0.298818	0.833333	0.133132	0.833333	0.286564	1.25	0.74389	0.833333	0.69956	1.33333	0.384235	1.33333	0.440411	2.83333	0.468528	2.5	0.704203	0.833333	0.463951	0.833333	0.280238	1.75	0.627238	1.66667	0.74413	1.25	0.453523	3.25	0.581258	0.833333	0.334901	2	0.094935	4.91667	0.11308	0.833333	0.615693
1.5	0.637719	1	0.308479	1.41667	0.628041	0.916667	0.859528	1.66667	0.282483	0.916667	0.138864	3.41667	0.275983	0.916667	0.124303	0.916667	0.390779	1.33333	0.788436	0.916667	0.834718	1.41667	0.411637	1.41667	0.516289	2.91667	0.452188	2.58333	0.743509	0.916667	0.512915	0.916667	0.28472	1.83333	0.668527	1.75	0.853997	1.33333	0.449848	3.33333	0.60728	0.916667	0.356491	2.08333	0.077303	5	0.170224	0.916667	0.685862
1.58333	0.714388	1.08333	0.350024	1.5	0.720964	1	0.939598	1.75	0.433978	1	0.035683	3.5	0.306458	1	0.157847	1	0.432809	1.41667	0.879839	1	0.930298	1.5	0.448614	1.5	0.561687	3	0.425851	2.66667	0.808504	1	0.562137	1	0.317602	1.91667	0.808603	1.83333	0.851069	1.41667	0.518751	3.41667	0.665414	1	0.378712	2.16667	0.059671	5.08333	0.184629	1	0.742484
1.66667	0.745325	1.16667	0.383145	1.58333	0.79309	1.08333	1.03059	1.83333	0.585474	1.08333	0.040242	3.58333	0.284952	1.08333	0.185904	1.08333	0.478352	1.5	0.929716	1.08333	1.0456	1.58333	0.471009	1.58333	0.622351	3.08333	0.4326	2.75	0.87996	1.08333	0.63211	1.08333	0.359881	2	0.948678	1.91667	0.98283	1.5	0.589582	3.5	0.707162	1.08333	0.327184	2.25	0.042039	5.16667	0.304334	1.08333	0.733805
1.75	0.79898	1.25	0.366138	1.66667	0.821494	1.16667	1.09656	1.91667	0.736969	1.16667	0.058222	3.66667	0.292009	1.16667	0.250001	1.16667	0.464577	1.58333	1.00225	1.16667	1.09722	1.66667	0.516619	1.66667	0.637085	3.16667	0.479866	2.83333	0.948171	1.16667	0.664691	1.16667	0.408549	2.08333	1.08875	2	1.04458	1.58333	0.661783	3.58333	0.809482	1.16667	0.295718	2.33333	0.024407	5.25	0.424987	1.16667	0.774372
1.83333	0.86913	1.33333	0.357447	1.75	0.878281	1.25	1.23253	2	0.785861	1.25	0.107931	3.75	0.293098	1.25	0.268699	1.25	0.389344	1.66667	1.04387	1.25	1.16511	1.75	0.59029	1.75	0.679177	3.25	0.59316	2.91667	1.00609	1.25	0.698933	1.25	0.400122	2.16667	1.22883	2.08333	1.17831	1.66667	0.799586	3.66667	0.84833	1.25	0.314782	2.41667	0.006775	5.33333	0.514227	1.25	0.753279
1.91667	0.912083	1.41667	0.352415	1.83333	0.945324	1.33333	1.32892	2.08333	0.835663	1.33333	0.179273	3.83333	0.281411	1.33333	0.341648	1.33333	0.302072	1.75	1.1006	1.33333	1.18131	1.83333	0.668347	1.83333	0.762219	3.33333	0.689372	3	0.978614	1.33333	0.72206	1.33333	0.455282	2.25	1.26549	2.16667	1.24693	1.75	0.818285	3.75	0.869883	1.33333	0.350998	2.5	0.083391	5.41667	0.547948	1.33333	0.60403
2	1.00384	1.5	0.38994	1.91667	0.988825	1.41667	1.38727	2.16667	0.856352	1.41667	0.224058	3.91667	0.279577	1.41667	0.360376	1.41667	0.183816	1.83333	1.15032	1.41667	1.25983	1.91667	0.704708	1.91667	0.863194	3.41667	0.763159	3.08333	0.963205	1.41667	0.768469	1.41667	0.460442	2.33333	1.31682	2.25	1.39338	1.83333	0.852286	3.83333	1.01076	1.41667	0.376731	2.58333	0.090389	5.5	0.578684	1.41667	0.454782
2.08333	1.06688	1.58333	0.42371	2	1.08005	1.5	1.43001	2.25	0.864032	1.5	0.298976	4	0.267015	1.5	0.403365	1.5	0.113591	1.91667	1.25626	1.5	1.30293	2	0.661191	2	0.904731	3.5	0.812173	3.16667	0.963886	1.5	0.879225	1.5	0.489571	2.41667	1.35143	2.33333	1.53984	1.91667	0.851742	3.91667	1.15164	1.5	0.469444	2.66667	0.086862	5.58333	0.570837	1.5	0.305533
2.16667	1.18105	1.66667	0.498008	2.08333	1.14189	1.58333	1.49308	2.33333	0.881401	1.58333	0.307885	4.08333	0.325721	1.58333	0.416599	1.58333	0.073031	2	1.3622	1.58333	1.41209	2.08333	0.606798	2.08333	0.918707	3.58333	0.892742	3.25	0.972078	1.58333	0.993597	1.58333	0.51476	2.5	1.42462	2.41667	1.69395	2	0.853371	4	1.29252	1.58333	0.479684	2.75	0.124315	5.66667	0.568331	1.58333	0.156285
2.25	1.24881	1.75	0.624973	2.16667	1.25427	1.66667	1.61867	2.41667	0.943684	1.66667	0.392767	4.16667	0.359272	1.66667	0.447201	1.66667	0.094502	2.08333	1.3704	1.66667	1.54132	2.16667	0.577604	2.16667	0.928472	3.66667	0.939022	3.33333	1.03503	1.66667	1.07274	1.66667	0.540739	2.58333	1.49766	2.5	1.79493	2.08333	0.858518	4.08333	1.4334	1.66667	0.471722	2.83333	0.171072	5.75	0.505677	1.66667	0.044025
2.33333	1.27898	1.83333	0.751938	2.25	1.32357	1.75	1.74427	2.5	0.979541	1.75	0.418708	4.25	0.379233	1.75	0.462221	1.75	0.115367	2.16667	1.44799	1.75	1.67724	2.25	0.622307	2.25	0.988077	3.75	0.972604	3.41667	1.03042	1.75	1.11719	1.75	0.59155	2.66667	1.57221	2.58333	1.83015	2.16667	0.878027	4.16667	1.51811	1.75	0.391675	2.91667	0.223946	5.83333	0.542024	1.75	0.0321
2.41667	1.30057	1.91667	0.878903	2.33333	1.35588	1.83333	1.88904	2.58333	1.00872	1.83333	0.443536	4.33333	0.35351	1.83333	0.496092	1.83333	0.119282	2.25	1.49225	1.83333	1.75847	2.33333	0.655856	2.33333	1.04742	3.83333	1.04107	3.5	1.07403	1.83333	1.12087	1.83333	0.664232	2.75	1.60609	2.66667	1.88376	2.25	0.917388	4.25	1.44217	1.83333	0.348227	3	0.1896	5.91667	0.641666	1.83333	0.032172
2.5	1.37312	2	1.00587	2.41667	1.37881	1.91667	2.04344	2.66667	0.991521	1.91667	0.483386	4.41667	0.358562	1.91667	0.50806	1.91667	0.100594	2.33333	1.54621	1.91667	1.87005	2.41667	0.655162	2.41667	1.07567	3.91667	1.14229	3.58333	1.08186	1.91667	1.14399	1.91667	0.705384	2.83333	1.59077	2.75	1.98572	2.33333	0.983889	4.33333	1.35269	1.91667	0.340492	3.08333	0.18487	6	0.752412	1.91667	0.031745
2.58333	1.38626	2.08333	0.972955	2.5	1.44503	2	2.08876	2.75	1.06173	2	0.577497	4.5	0.353431	2	0.584757	2	0.066321	2.41667	1.58806	2	1.9035	2.5	0.694932	2.5	1.12049	4	1.19475	3.66667	1.14125	2	1.20286	2	0.673325	2.91667	1.58383	2.83333	2.03545	2.41667	0.968986	4.41667	1.34549	2	0.275705	3.16667	0.193971	6.08333	0.809683	2	0.136096
2.66667	1.38106	2.16667	1.12633	2.58333	1.45682	2.08333	2.17015	2.83333	1.11343	2.08333	0.637824	4.58333	0.373046	2.08333	0.703754	2.08333	0.029012	2.5	1.59415	2.08333	1.92435	2.58333	0.673681	2.58333	1.15907	4.08333	1.2211	3.75	1.16578	2.08333	1.29918	2.08333	0.641266	3	1.62866	2.91667	2.1601	2.5	0.983483	4.5	1.48382	2.08333	0.19478	3.25	0.239497	6.16667	0.832036	2.08333	0.195501
2.75	1.34926	2.25	1.27971	2.66667	1.45104	2.16667	2.27716	2.91667	1.14766	2.16667	0.693023	4.66667	0.395124	2.16667	0.827438	2.16667	0.000384	2.58333	1.66752	2.16667	1.91916	2.66667	0.636287	2.66667	1.19781	4.16667	1.25572	3.83333	1.21283	2.16667	1.37697	2.16667	0.605119	3.08333	1.67069	3	2.05187	2.58333	0.932966	4.58333	1.63038	2.16667	0.199243	3.33333	0.33905	6.25	0.832672	2.16667	0.249533
2.83333	1.38125	2.33333	1.43308	2.75	1.42407	2.25	2.32707	3	1.17713	2.25	0.636766	4.75	0.401363	2.25	0.876966	2.25	0.02302	2.66667	1.64988	2.25	2.00732	2.75	0.753973	2.75	1.25008	4.25	1.31047	3.91667	1.22412	2.25	1.42685	2.25	0.66331	3.16667	1.70764	3.08333	2.1374	2.66667	0.945504	4.66667	1.75199	2.25	0.294826	3.41667	0.415632	6.33333	0.851193	2.25	0.3028
2.91667	1.39126	2.41667	1.5037	2.83333	1.45656	2.33333	2.36254	3.08333	1.1724	2.33333	0.692453	4.83333	0.40016	2.33333	0.902073	2.33333	0.032019	2.75	1.66915	2.33333	2.10871	2.83333	0.871659	2.83333	1.26277	4.33333	1.37494	4	1.24537	2.33333	1.44624	2.33333	0.756096	3.25	1.72792	3.16667	2.17986	2.75	1.02384	4.75	1.81554	2.33333	0.325879	3.5	0.470632	6.41667	0.857289	2.33333	0.398838
3	1.42996	2.5	1.59335	2.91667	1.46488	2.41667	2.39731	3.16667	1.17817	2.41667	0.735666	4.91667	0.425482	2.41667	0.902623	2.41667	0.016706	2.83333	1.63816	2.41667	2.25751	2.91667	0.989345	2.91667	1.2862	4.41667	1.39431	4.08333	1.26795	2.41667	1.53087	2.41667	0.815996	3.33333	1.76024	3.25	2.23897	2.83333	1.08441	4.83333	1.88684	2.41667	0.3515	3.58333	0.537621	6.5	0.922522	2.41667	0.480736
3.08333	1.44427	2.58333	1.56908	3	1.50625	2.5	2.43871	3.25	1.10359	2.5	0.864903	5	0.484999	2.5	0.933717	2.5	0.036453	2.91667	1.70835	2.5	2.27707	3	1.04657	3	1.28862	4.5	1.38493	4.16667	1.28729	2.5	1.64745	2.5	0.839021	3.41667	1.81995	3.33333	2.24695	2.91667	1.12844	4.91667	1.94881	2.5	0.391933	3.66667	0.565645	6.58333	0.992726	2.5	0.612833
3.16667	1.52227	2.66667	1.6267	3.08333	1.52071	2.58333	2.48632	3.33333	0.987089	2.58333	0.938014	5.08333	0.568026	2.58333	0.949612	2.58333	0.095814	3	1.71541	2.58333	2.36596	3.08333	1.0935	3.08333	1.32265	4.58333	1.38111	4.25	1.37005	2.58333	1.73011	2.58333	0.817646	3.5	1.85458	3.41667	2.29377	3	1.13214	5	2.07431	2.58333	0.42953	3.75	0.557286	6.66667	1.06029	2.58333	0.740055
3.25	1.54606	2.75	1.73103	3.16667	1.59326	2.66667	2.50396	3.41667	0.931213	2.66667	1.02155	5.16667	0.618683	2.66667	1.01552	2.66667	0.154967	3.08333	1.73011	2.66667	2.44038	3.16667	1.06934	3.16667	1.31848	4.66667	1.40605	4.33333	1.37378	2.66667	1.76572	2.66667	0.77933	3.58333	1.91352	3.5	2.31244	3.08333	1.03054	5.08333	2.13544	2.66667	0.436127	3.83333	0.564892	6.75	1.09173	2.66667	0.806052
3.33333	1.59356	2.83333	1.83536	3.25	1.61722	2.75	2.62975	3.5	0.935347	2.75	1.07975	5.25	0.67505	2.75	1.00584	2.75	0.20774	3.16667	1.74508	2.75	2.55377	3.25	1.15616	3.25	1.29054	4.75	1.49798	4.41667	1.46145	2.75	1.684	2.75	0.700935	3.66667	1.99214	3.58333	2.37831	3.16667	0.969832	5.16667	2.17883	2.75	0.486796	3.91667	0.50478	6.83333	1.14333	2.75	0.874983
3.41667	1.64509	2.91667	1.95765	3.33333	1.66575	2.83333	2.75555	3.58333	1.03653	2.83333	1.12945	5.33333	0.72151	2.83333	1.00646	2.83333	0.3003	3.25	1.78499	2.83333	2.63365	3.33333	1.2189	3.33333	1.27639	4.83333	1.65648	4.5	1.50155	2.83333	1.691	2.83333	0.683218	3.75	2.0398	3.66667	2.39441	3.25	0.935484	5.25	2.20679	2.83333	0.536773	4	0.444672	6.91667	1.16008	2.83333	0.883571
3.5	1.76313	3	2.08639	3.41667	1.71761	2.91667	2.79997	3.66667	1.09249	2.91667	1.18386	5.41667	0.751759	2.91667	1.00181	2.91667	0.328657	3.33333	1.80136	2.91667	2.69977	3.41667	1.27361	3.41667	1.28691	4.91667	1.70471	4.58333	1.59182	2.91667	1.81149	2.91667	0.745658	3.83333	2.05638	3.75	2.46069	3.33333	0.938878	5.33333	2.22112	2.91667	0.484263	4.08333	0.321536	7	1.17979	2.91667	0.925755
3.58333	1.86417	3.08333	2.12711	3.5	1.83779	3	2.87231	3.75	1.16667	3	1.27728	5.5	0.798733	3	1.04148	3	0.354916	3.41667	1.8259	3	2.76714	3.5	1.34601	3.5	1.31541	5	1.73824	4.66667	1.60598	3	1.93661	3	0.780229	3.91667	2.09687	3.83333	2.49963	3.41667	0.967978	5.41667	2.28626	3	0.467484	4.16667	0.39545	7.08333	1.18072	3	0.981978
3.66667	1.9476	3.16667	2.19132	3.58333	1.93225	3.08333	2.81567	3.83333	1.22017	3.08333	1.33579	5.58333	0.85036	3.08333	1.08997	3.08333	0.363295	3.5	1.87865	3.08333	2.85531	3.58333	1.39664	3.58333	1.36798	5.08333	1.77845	4.75	1.61782	3.08333	2.09055	3.08333	0.769723	4	2.14805	3.91667	2.48565	3.5	1.00686	5.5	2.26825	3.08333	0.395877	4.25	0.512689	7.16667	1.19103	3.08333	1.04763
3.75	1.97239	3.25	2.17859	3.66667	2.01861	3.16667	2.85061	3.91667	1.28009	3.16667	1.36817	5.66667	0.885968	3.16667	1.13544	3.16667	0.38772	3.58333	1.92238	3.16667	2.95957	3.66667	1.42866	3.66667	1.36327	5.16667	1.79899	4.83333	1.65278	3.16667	2.24449	3.16667	0.739796	4.08333	2.22741	4	2.48238	3.58333	1.11182	5.58333	2.33603	3.16667	0.429098	4.33333	0.515298	7.25	1.21358	3.16667	1.15331
3.83333	1.99256	3.33333	2.19241	3.75	2.04051	3.25	2.77106	4	1.36142	3.25	1.35049	5.75	0.939277	3.25	1.12496	3.25	0.489178	3.66667	1.96696	3.25	3.02175	3.75	1.43548	3.75	1.43407	5.25	1.83774	4.91667	1.68719	3.25	2.32866	3.25	0.706066	4.16667	2.29143	4.08333	2.45538	3.66667	1.1442	5.66667	2.2852	3.25	0.36585	4.41667	0.508636	7.33333	1.2417	3.25	1.30078
3.91667	2.06832	3.41667	2.16505	3.83333	2.06156	3.33333	2.82387	4.08333	1.44967	3.33333	1.44697	5.83333	0.986928	3.33333	1.13574	3.33333	0.587799	3.75	1.97528	3.33333	3.09956	3.83333	1.4541	3.83333	1.44435	5.33333	1.86252	5	1.69395	3.33333	2.34631	3.33333	0.708612	4.25	2.40313	4.16667	2.5065	3.75	1.17137	5.75	2.28577	3.33333	0.305133	4.5	0.46108	7.41667	1.25193	3.33333	1.44825
4	2.18612	3.5	2.20568	3.91667	2.14065	3.41667	2.95702	4.16667	1.49716	3.41667	1.51423	5.91667	1.04698	3.41667	1.11138	3.41667	0.643723	3.83333	1.97926	3.41667	3.14223	3.91667	1.51136	3.91667	1.54092	5.41667	1.91741	5.08333	1.73426	3.41667	2.37833	3.41667	0.682467	4.33333	2.47496	4.25	2.47354	3.83333	1.16687	5.83333	2.3275	3.41667	0.281087	4.58333	0.435599	7.5	1.23253	3.41667	1.54791
4.08333	2.24922	3.58333	2.19297	4	2.25056	3.5	3.09017	4.25	1.50479	3.5	1.64076	6	1.06616	3.5	1.13583	3.5	0.647067	3.91667	1.9953	3.5	3.21223	4	1.66278	4	1.54845	5.5	1.99297	5.16667	1.74991	3.5	2.42379	3.5	0.707085	4.41667	2.59451	4.33333	2.53894	3.91667	1.20795	5.91667	2.37115	3.5	0.29002	4.66667	0.438036	7.58333	1.21748	3.5	1.57706
4.16667	2.26136	3.66667	2.18622	4.08333	2.32867	3.58333	3.22332	4.33333	1.44163	3.58333	1.70493	6.08333	1.06327	3.58333	1.15309	3.58333	0.643034	4	1.97446	3.58333	3.3049	4.08333	1.81419	4.08333	1.57411	5.58333	2.025	5.25	1.76932	3.58333	2.45214	3.58333	0.761048	4.5	2.66758	4.41667	2.5198	4	1.2282	6	2.49588	3.58333	0.333973	4.75	0.450409	7.66667	1.22635	3.58333	1.59202
4.25	2.25036	3.75	2.17443	4.16667	2.3448	3.66667	3.27901	4.41667	1.49239	3.66667	1.79165	6.16667	1.06094	3.66667	1.2614	3.66667	0.677115	4.08333	1.97204	3.66667	3.35835	4.16667	1.96561	4.16667	1.71934	5.66667	2.05224	5.33333	1.75343	3.66667	2.49585	3.66667	0.796606	4.58333	2.76715	4.5	2.58391	4.08333	1.23279	6.08333	2.52812	3.66667	0.438414	4.83333	0.458399	7.75	1.21471	3.66667	1.66493
4.33333	2.2581	3.83333	2.22112	4.25	2.3334	3.75	3.16688	4.5	1.51158	3.75	1.88057	6.25	1.09046	3.75	1.29311	3.75	0.687728	4.16667	1.96833	3.75	3.42211	4.25	2.11702	4.25	1.78666	5.75	2.04443	5.41667	1.78652	3.75	2.48967	3.75	0.822265	4.66667	2.84032	4.58333	2.58982	4.16667	1.31611	6.16667	2.56968	3.75	0.385923	4.91667	0.423254	7.83333	1.21272	3.75	1.77717
4.41667	2.28906	3.91667	2.25247	4.33333	2.34003	3.83333	3.05474	4.58333	1.55856	3.83333	1.99606	6.33333	1.17517	3.83333	1.2838	3.83333	0.709439	4.25	1.98442	3.83333	3.44532	4.33333	2.15411	4.33333	1.88862	5.83333	2.17602	5.5	1.80777	3.83333	2.49645	3.83333	0.797563	4.75	2.93178	4.66667	2.6501	4.25	1.35859	6.25	2.52412	3.83333	0.420775	5	0.411053	7.91667	1.24771	3.83333	1.88454
4.5	2.30585	4	2.31077	4.41667	2.36238	3.91667	2.9426	4.66667	1.56127	3.91667	2.09831	6.41667	1.22235	3.91667	1.22402	3.91667	0.726604	4.33333	1.98526	3.91667	3.49444	4.41667	2.01471	4.41667	1.82426	5.91667	2.30761	5.58333	1.83022	3.91667	2.46897	3.91667	0.830133	4.83333	3.04532	4.75	2.65093	4.33333	1.42317	6.33333	2.50108	3.91667	0.320364	5.08333	0.46233	8	1.26931	3.91667	1.95516
4.58333	2.32879	4.08333	2.38021	4.5	2.37062	4	2.83046	4.75	1.62829	4	2.16658	6.5	1.24029	4	1.17219	4	0.778797	4.41667	1.98067	4	3.56333	4.5	1.87531	4.5	1.78796	6	2.3977	5.66667	1.83106	4	2.53271	4	0.893961	4.91667	3.11585	4.83333	2.58377	4.41667	1.41488	6.41667	2.56408	4	0.393131	5.16667	0.461812	8.08333	1.28537	4	2.03771
4.66667	2.31391	4.16667	2.39933	4.58333	2.38952	4.08333	2.83287	4.83333	1.78527	4.08333	2.19349	6.58333	1.36443	4.08333	1.18393	4.08333	0.792448	4.5	1.97345	4.08333	3.70854	4.58333	1.73638	4.58333	1.75149	6.08333	2.44558	5.75	1.85616	4.08333	2.5668	4.08333	0.926315	5	3.1405	4.91667	2.50919	4.5	1.42679	6.5	2.59866	4.08333	0.460389	5.25	0.483599	8.16667	1.30628	4.08333	2.11731
4.75	2.30206	4.25	2.43401	4.66667	2.3824	4.16667	2.91016	4.91667	1.92093	4.16667	2.23249	6.66667	1.48856	4.16667	1.13988	4.16667	0.829936	4.58333	2.00497	4.16667	3.85375	4.66667	1.65915	4.66667	1.88292	6.16667	2.49673	5.83333	1.9014	4.16667	2.63295	4.16667	0.907933	5.08333	3.1553	5	2.56232	4.58333	1.47089	6.58333	2.63113	4.16667	0.505056	5.33333	0.482482	8.25	1.37399	4.16667	2.17961
4.83333	2.3267	4.33333	2.48281	4.75	2.36914	4.25	2.97039	5	1.99124	4.25	2.27581	6.75	1.6127	4.25	1.15602	4.25	0.842405	4.66667	2.02162	4.25	3.92362	4.75	1.71655	4.75	2.01436	6.25	2.52997	5.91667	1.91569	4.25	2.68622	4.25	0.921494	5.16667	3.14657	5.08333	2.66196	4.66667	1.53724	6.66667	2.58726	4.25	0.502479	5.41667	0.494361	8.33333	1.49146	4.25	2.21763
4.91667	2.35588	4.41667	2.50753	4.83333	2.38758	4.33333	3.09145	5.08333	2.03006	4.33333	2.30668	6.83333	1.70601	4.33333	1.13713	4.33333	0.869462	4.75	2.06158	4.33333	3.97797	4.83333	1.76064	4.83333	2.14579	6.33333	2.56636	6	1.93445	4.33333	2.80048	4.33333	0.933505	5.25	3.22962	5.16667	2.75215	4.75	1.59519	6.75	2.61905	4.33333	0.45717	5.5	0.467454	8.41667	1.55848	4.33333	2.21157
5	2.38017	4.5	2.52149	4.91667	2.41169	4.41667	3.13761	5.16667	2.08884	4.41667	2.29731	6.91667	1.76015	4.41667	1.19283	4.41667	0.894697	4.83333	2.06582	4.41667	4.04851	4.91667	1.75918	4.91667	2.28512	6.41667	2.60326	6.08333	1.91451	4.41667	2.90682	4.41667	0.958882	5.33333	3.30823	5.25	2.84109	4.83333	1.6462	6.83333	2.68166	4.41667	0.48425	5.58333	0.40945	8.5	1.60607	4.41667	2.26823
5.08333	2.38604	4.58333	2.48084	5	2.44156	4.5	3.17089	5.25	2.09753	4.5	2.25097	7	1.79386	4.5	1.29729	4.5	0.932943	4.91667	2.08914	4.5	4.1534	5	1.84479	5	2.29547	6.5	2.64074	6.16667	1.94659	4.5	2.96185	4.5	0.962257	5.41667	3.40282	5.33333	2.90405	4.91667	1.66205	6.91667	2.75327	4.5	0.548615	5.66667	0.392139	8.58333	1.57416	4.5	2.30532
5.16667	2.41564	4.66667	2.56812	5.08333	2.448	4.58333	3.12508	5.33333	2.1301	4.58333	2.20951	7.08333	1.85456	4.58333	1.42588	4.58333	0.962919	5	2.14228	4.58333	4.25736	5.08333	1.87289	5.08333	2.34656	6.58333	2.6366	6.25	1.93227	4.58333	3.01361	4.58333	0.962233	5.5	3.43457	5.41667	2.99098	5	1.7131	7	2.76474	4.58333	0.597948	5.75	0.457516	8.66667	1.59913	4.58333	2.3708
5.25	2.47233	4.75	2.6113	5.16667	2.47177	4.66667	3.13	5.41667	2.1459	4.66667	2.20825	7.16667	1.95583	4.66667	1.55448	4.66667	0.937643	5.08333	2.19175	4.66667	4.31625	5.16667	2.03007	5.16667	2.37461	6.66667	2.64594	6.33333	1.94292	4.66667	3.04757	4.66667	0.958562	5.58333	3.46916	5.5	3.05992	5.08333	1.78966	7.08333	2.71863	4.66667	0.59916	5.83333	0.534542	8.75	1.58095	4.66667	2.3885
5.33333	2.48209	4.83333	2.75215	5.25	2.52936	4.75	3.12446	5.5	2.14854	4.75	2.26004	7.25	1.98627	4.75	1.64783	4.75	0.918786	5.16667	2.22186	4.75	4.38015	5.25	2.1009	5.25	2.42521	6.75	2.64271	6.41667	1.93789	4.75	3.13207	4.75	0.93104	5.66667	3.5124	5.58333	3.13131	5.16667	1.82034	7.16667	2.69925	4.75	0.596831	5.91667	0.612295	8.83333	1.63523	4.75	2.43218
5.41667	2.49314	4.91667	2.84137	5.33333	2.5359	4.83333	3.1831	5.58333	2.14748	4.83333	2.32439	7.33333	2.02603	4.83333	1.74454	4.83333	0.886584	5.25	2.21027	4.83333	4.387	5.33333	2.12489	5.33333	2.4702	6.83333	2.67167	6.5	1.94307	4.83333	3.19695	4.83333	0.955484	5.75	3.5735	5.66667	3.17926	5.25	1.83704	7.25	2.74744	4.83333	0.583897	6	0.674247	8.91667	1.65918	4.83333	2.42909
5.5	2.52072	5	2.89715	5.41667	2.55297	4.91667	3.2277	5.66667	2.13282	4.91667	2.39105	7.41667	2.03913	4.91667	1.69979	4.91667	0.915201	5.33333	2.27913	4.91667	4.42508	5.41667	2.2758	5.41667	2.53497	6.91667	2.68622	6.58333	1.97764	4.91667	3.28682	4.91667	0.935015	5.83333	3.59979	5.75	3.18601	5.33333	1.86451	7.33333	2.86156	4.91667	0.625349	6.08333	0.740169	9	1.69725	4.91667	2.46568
5.58333	2.525	5.08333	2.91033	5.5	2.58233	5	3.29827	5.75	2.15732	5	2.47861	7.5	2.08395	5	1.67084	5	0.954754	5.41667	2.41354	5	4.44422	5.5	2.42671	5.5	2.57768	7	2.6794	6.66667	2.0008	5	3.30754	5	0.947075	5.91667	3.64209	5.83333	3.16607	5.41667	1.93891	7.41667	2.91256	5	0.728636	6.16667	0.757606	9.08333	1.68704	5	2.46908
5.66667	2.57994	5.16667	2.95043	5.58333	2.5914	5.08333	3.42699	5.83333	2.13784	5.08333	2.5205	7.58333	2.12848	5.08333	1.56132	5.08333	1.00267	5.5	2.51775	5.08333	4.54072	5.58333	2.57761	5.58333	2.62265	7.08333	2.68964	6.75	2.03697	5.08333	3.35068	5.08333	0.953702	6	3.71077	5.91667	3.13951	5.5	2.08245	7.5	2.87147	5.08333	0.765783	6.25	0.791983	9.16667	1.66808	5.08333	2.51732
5.75	2.60658	5.25	2.97973	5.66667	2.65108	5.16667	3.51659	5.91667	2.13232	5.16667	2.59452	7.66667	2.24685	5.16667	1.52404	5.16667	1.02264	5.58333	2.56961	5.16667	4.63312	5.66667	2.72852	5.66667	2.63152	7.16667	2.67797	6.83333	2.04526	5.16667	3.40124	5.16667	1.0014	6.08333	3.80942	6	3.12648	5.58333	2.14414	7.58333	2.84271	5.16667	0.891164	6.33333	0.800386	9.25	1.69562	5.16667	2.47106
5.83333	2.71296	5.33333	2.95455	5.75	2.68121	5.25	3.60789	6	2.12671	5.25	2.64858	7.75	2.25745	5.25	1.45066	5.25	1.02869	5.66667	2.62578	5.25	4.73177	5.75	2.87943	5.75	2.64562	7.25	2.68472	6.91667	2.06311	5.25	3.51914	5.25	1.00695	6.16667	3.87432	6.08333	3.11399	5.66667	2.21944	7.66667	2.88858	5.25	0.892858	6.41667	0.880407	9.33333	1.73523	5.25	2.40716
5.91667	2.66674	5.41667	2.94681	5.83333	2.79092	5.33333	3.61019	6.08333	2.15405	5.33333	2.69586	7.83333	2.28245	5.33333	1.48846	5.33333	1.05382	5.75	2.71504	5.33333	4.79981	5.83333	2.8608	5.83333	2.67434	7.33333	2.68247	7	2.04368	5.33333	3.61161	5.33333	0.984917	6.25	3.89796	6.16667	3.16115	5.75	2.19909	7.75	2.97509	5.33333	0.982549	6.5	0.910299	9.41667	1.79554	5.33333	2.31076
6	2.71041	5.5	2.92878	5.91667	2.74413	5.41667	3.70657	6.16667	2.18074	5.41667	2.77858	7.91667	2.27966	5.41667	1.54227	5.41667	1.04887	5.83333	2.81178	5.41667	4.85575	5.91667	2.84217	5.91667	2.70254	7.41667	2.70462	7.08333	1.992	5.41667	3.75984	5.41667	1.01668	6.33333	3.92476	6.25	3.21834	5.83333	2.31051	7.83333	3.03191	5.41667	1.05459	6.58333	0.945567	9.5	1.78037	5.41667	2.3501
6.08333	2.70272	5.58333	2.91062	6	2.77627	5.5	3.72419	6.25	2.18857	5.5	2.83332	8	2.32375	5.5	1.60157	5.5	1.08532	5.91667	2.94684	5.5	4.90498	6	2.82355	6	2.7679	7.5	2.70622	7.16667	1.97483	5.5	3.86682	5.5	1.01675	6.41667	3.98696	6.33333	3.29337	5.91667	2.34022	7.91667	2.97843	5.5	1.19501	6.66667	0.960015	9.58333	1.80821	5.5	2.36655
6.16667	2.75034	5.66667	2.86098	6.08333	2.76694	5.58333	3.82962	6.33333	2.1929	5.58333	2.95657	8.08333	2.35359	5.58333	1.65878	5.58333	1.06069	6	3.08191	5.58333	4.9011	6.08333	2.84176	6.08333	2.83481	7.58333	2.73041	7.25	2.01695	5.58333	3.91819	5.58333	1.06808	6.5	4.07376	6.41667	3.31929	6	2.38716	8	2.95426	5.58333	1.21931	6.75	0.975063	9.66667	1.83108	5.58333	2.38172
6.25	2.75092	5.75	2.86374	6.16667	2.8054	5.66667	3.88177	6.41667	2.1788	5.66667	3.06085	8.16667	2.38066	5.66667	1.63309	5.66667	1.11755	6.08333	3.09036	5.66667	4.93296	6.16667	2.85933	6.16667	2.90038	7.66667	2.7112	7.33333	2.05172	5.66667	3.97157	5.66667	1.03831	6.58333	4.06691	6.5	3.37522	6.08333	2.35716	8.08333	2.92363	5.66667	1.23621	6.83333	0.991488	9.75	1.91549	5.66667	2.39162
6.33333	2.7667	5.83333	2.84714	6.25	2.81498	5.75	4.01622	6.5	2.20345	5.75	3.15802	8.25	2.43273	5.75	1.6393	5.75	1.14244	6.16667	3.16621	5.75	4.9006	6.25	2.87427	6.25	2.97977	7.75	2.7211	7.41667	2.11485	5.75	3.97746	5.75	1.06895	6.66667	4.06095	6.58333	3.42991	6.16667	2.34511	8.16667	2.9902	5.75	1.23264	6.91667	0.997496	9.83333	1.95218	5.75	2.45358
6.41667	2.78413	5.91667	2.82765	6.33333	2.82231	5.83333	4.07401	6.58333	2.21958	5.83333	3.1885	8.33333	2.55343	5.83333	1.65355	5.83333	1.19402	6.25	3.21617	5.83333	4.96149	6.33333	2.92919	6.33333	3.0206	7.83333	2.67879	7.5	2.02311	5.83333	4.00743	5.83333	1.02823	6.75	4.08341	6.66667	3.48863	6.25	2.3829	8.25	3.02928	5.83333	1.18824	7	1.05949	9.91667	1.98659	5.83333	2.50808
6.5	2.76026	6	2.85611	6.41667	2.84182	5.91667	4.18082	6.66667	2.2773	5.91667	3.20479	8.41667	2.66738	5.91667	1.66527	5.91667	1.19539	6.33333	3.28208	5.91667	4.99358	6.41667	2.90706	6.41667	3.03064	7.91667	2.65647	7.58333	2.0448	5.91667	4.07285	5.91667	1.04948	6.83333	4.15919	6.75	3.49073	6.33333	2.38756	8.33333	3.06622	5.91667	1.20378	7.08333	1.18169	10	2.00733	5.91667	2.6075
6.58333	2.76814	6.08333	2.8792	6.5	2.81776	6	4.22621	6.75	2.30067	6	3.23534	8.5	2.81136	6	1.7025	6	1.19712	6.41667	3.37417	6	5.07	6.5	2.854	6.5	3.01396	8	2.62936	7.66667	2.02214	6	4.17769	6	1.04201	6.91667	4.21087	6.83333	3.49671	6.41667	2.41218	8.41667	3.08467	6	1.17661	7.16667	1.24469	10.0833	2.03502	6	2.6892
6.66667	2.76432	6.16667	2.86746	6.58333	2.83132	6.08333	4.37087	6.83333	2.31327	6.08333	3.24096	8.58333	2.93803	6.08333	1.71802	6.08333	1.2059	6.5	3.48551	6.08333	5.10711	6.58333	2.8387	6.58333	2.99494	8.08333	2.65034	7.75	2.07846	6.08333	4.32407	6.08333	1.06664	7	4.27412	6.91667	3.49499	6.5	2.42836	8.5	3.10418	6.08333	1.23268	7.25	1.33425	10.1667	2.06859	6.08333	2.73869
6.75	2.81271	6.25	2.81052	6.66667	2.83414	6.16667	4.51553	6.91667	2.33719	6.16667	3.28935	8.66667	3.06932	6.16667	1.7176	6.16667	1.16695	6.58333	3.6154	6.16667	5.17873	6.66667	2.84042	6.66667	3.03268	8.16667	2.69315	7.83333	2.09446	6.16667	4.36863	6.16667	1.10195	7.08333	4.31462	7	3.51637	6.58333	2.42361	8.58333	3.12756	6.16667	1.23812	7.33333	1.45392	10.25	2.1009	6.16667	2.72862
6.83333	2.86509	6.33333	2.80242	6.75	2.88128	6.25	4.66018	7	2.32214	6.25	3.3121	8.75	3.1502	6.25	1.65278	6.25	1.12051	6.66667	3.7483	6.25	5.20465	6.75	2.89398	6.75	3.07854	8.25	2.71617	7.91667	2.13128	6.25	4.40018	6.25	1.09338	7.16667	4.36565	7.08333	3.52424	6.66667	2.43237	8.66667	3.21896	6.25	1.27041	7.41667	1.5519	10.3333	2.14604	6.25	2.77401
6.91667	2.85914	6.41667	2.83367	6.83333	2.94209	6.33333	4.80484	7.08333	2.33712	6.33333	3.39501	8.83333	3.18661	6.33333	1.63	6.33333	1.07669	6.75	3.87958	6.33333	5.2123	6.83333	2.88329	6.83333	3.15957	8.33333	2.71396	8	2.14444	6.33333	4.39785	6.33333	1.11124	7.25	4.35042	7.16667	3.54732	6.75	2.45281	8.75	3.26257	6.33333	1.30802	7.5	1.62043	10.4167	2.14296	6.33333	2.8493
7	2.84942	6.5	2.85524	6.91667	2.93388	6.41667	4.84202	7.16667	2.30791	6.41667	3.45156	8.91667	3.22202	6.41667	1.67019	6.41667	1.0927	6.83333	4.00641	6.41667	5.18828	6.91667	2.90971	6.91667	3.26019	8.41667	2.70373	8.08333	2.15762	6.41667	4.43681	6.41667	1.12362	7.33333	4.43633	7.25	3.56251	6.83333	2.53296	8.83333	3.36357	6.41667	1.37927	7.58333	1.63754	10.5	2.1138	6.41667	3.00103
7.08333	2.88245	6.58333	2.875	7	2.91035	6.5	4.84176	7.25	2.33071	6.5	3.50493	9	3.26582	6.5	1.67013	6.5	1.12573	6.91667	4.02475	6.5	5.16947	7	2.91857	7	3.29401	8.5	2.75158	8.16667	2.15077	6.5	4.50763	6.5	1.16411	7.41667	4.47835	7.33333	3.61257	6.91667	2.60058	8.91667	3.37988	6.5	1.37988	7.66667	1.67867	10.5833	2.0683	6.5	3.12987
7.16667	2.94975	6.66667	2.88017	7.08333	2.94308	6.58333	4.85684	7.33333	2.33575	6.58333	3.55687	9.08333	3.30939	6.58333	1.64771	6.58333	1.13487	7	4.02967	6.58333	5.1442	7.08333	2.94032	7.08333	3.28839	8.58333	2.79202	8.25	2.18414	6.58333	4.57326	6.58333	1.19319	7.5	4.56812	7.41667	3.63061	7	2.63721	9	3.38052	6.58333	1.34715	7.75	1.72078	10.6667	2.05687	6.58333	3.20203
7.25	2.94927	6.75	2.94513	7.16667	2.99979	6.66667	4.85644	7.41667	2.35854	6.66667	3.60313	9.16667	3.34509	6.66667	1.61908	6.66667	1.13508	7.08333	4.01138	6.66667	5.20275	7.16667	3.01178	7.16667	3.26929	8.66667	2.79168	8.33333	2.21753	6.66667	4.71528	6.66667	1.21224	7.58333	4.60912	7.5	3.66869	7.08333	2.63055	9.08333	3.36486	6.66667	1.36789	7.83333	1.76972	10.75	2.07341	6.66667	3.26246
7.33333	2.84002	6.83333	2.95419	7.25	2.99967	6.75	4.89351	7.5	2.34681	6.75	3.63611	9.25	3.46921	6.75	1.64159	6.75	1.1246	7.16667	4.05221	6.75	5.23193	7.25	3.01395	7.25	3.30099	8.75	2.78874	8.41667	2.20023	6.75	4.84904	6.75	1.24936	7.66667	4.66556	7.58333	3.7168	7.16667	2.6292	9.16667	3.4938	6.75	1.33272	7.91667	1.80358	10.8333	2.05915	6.75	3.33434
7.41667	2.77633	6.91667	2.95382	7.33333	2.88553	6.83333	4.93184	7.58333	2.32845	6.83333	3.70412	9.33333	3.59333	6.83333	1.64412	6.83333	1.13187	7.25	4.0986	6.83333	5.24873	7.33333	3.01918	7.33333	3.34987	8.83333	2.75588	8.5	2.15609	6.83333	4.93544	6.83333	1.30774	7.75	4.72385	7.66667	3.73973	7.25	2.63783	9.25	3.62274	6.83333	1.35403	8	1.8292	10.9167	2.07522	6.83333	3.38807
7.5	2.82413	7	2.98386	7.41667	2.82296	6.91667	4.94381	7.66667	2.4333	6.91667	3.7627	9.41667	3.69531	6.91667	1.6216	6.91667	1.15492	7.33333	4.16208	6.91667	5.24239	7.41667	3.0825	7.41667	3.36867	8.91667	2.77651	8.58333	2.14192	6.91667	5.00617	6.91667	1.35523	7.83333	4.7686	7.75	3.75781	7.33333	2.67972	9.33333	3.68524	6.91667	1.33634	8.08333	1.84088	11	2.1038	6.91667	3.43184
7.58333	2.85358	7.08333	3.05006	7.5	2.86833	7	4.93145	7.75	2.44839	7	3.84294	9.5	3.75543	7	1.64835	7	1.16551	7.41667	4.30558	7	5.24342	7.5	3.16671	7.5	3.35114	9	2.72672	8.66667	2.18358	7	5.13485	7	1.37456	7.91667	4.78519	7.83333	3.70391	7.41667	2.76482	9.41667	3.70685	7	1.38923	8.16667	1.83571	11.0833	2.12163	7	3.50678
7.66667	2.92941	7.16667	3.18877	7.58333	2.90613	7.08333	4.94334	7.83333	2.50153	7.08333	3.90892	9.58333	3.84503	7.08333	1.68472	7.08333	1.16107	7.5	4.38657	7.08333	5.2609	7.58333	3.2051	7.58333	3.35382	9.08333	2.74093	8.75	2.22421	7.08333	5.22955	7.08333	1.39023	8	4.8429	7.91667	3.69208	7.5	2.80382	9.5	3.66908	7.08333	1.35817	8.25	1.79818	11.1667	2.09075	7.08333	3.63819
7.75	2.78351	7.25	3.21674	7.66667	2.98361	7.16667	4.92098	7.91667	2.43184	7.16667	4.00533	9.66667	3.95544	7.16667	1.72118	7.16667	1.14755	7.58333	4.47625	7.16667	5.25203	7.66667	3.07792	7.66667	3.37786	9.16667	2.71955	8.83333	2.1887	7.16667	5.31018	7.16667	1.38354	8.08333	4.83692	8	3.65077	7.58333	2.85841	9.58333	3.55215	7.16667	1.38669	8.33333	1.79552	11.25	2.07697	7.16667	3.73199
7.83333	2.72449	7.33333	3.22053	7.75	2.85129	7.25	4.94929	8	2.46042	7.25	4.12822	9.75	4.09606	7.25	1.73987	7.25	1.12868	7.66667	4.54164	7.25	5.24465	7.75	3.03066	7.75	3.44934	9.25	2.756	8.91667	2.1609	7.25	5.36879	7.25	1.3839	8.16667	4.88264	8.08333	3.63678	7.66667	2.86301	9.66667	3.43523	7.25	1.42326	8.41667	1.76903	11.3333	2.08528	7.25	3.75095
7.91667	2.64261	7.41667	3.27046	7.83333	2.7873	7.33333	4.92956	8.08333	2.49147	7.33333	4.15578	9.83333	4.13955	7.33333	1.74159	7.33333	1.11326	7.75	4.69951	7.33333	5.26307	7.83333	3.07449	7.83333	3.49673	9.33333	2.75222	9	2.12629	7.33333	5.43985	7.33333	1.36385	8.25	4.9428	8.16667	3.60476	7.75	2.8868	9.75	3.3183	7.33333	1.46503	8.5	1.82961	11.4167	2.12998	7.33333	3.73975
8	2.69228	7.5	3.23797	7.91667	2.69918	7.41667	4.96283	8.16667	2.49823	7.41667	4.22966	9.91667	4.1875	7.41667	1.78137	7.41667	1.10095	7.83333	4.8391	7.41667	5.28544	7.91667	3.09734	7.91667	3.56162	9.41667	2.73943	9.08333	2.17013	7.41667	5.48672	7.41667	1.34088	8.33333	5.01024	8.25	3.62415	7.83333	2.89725	9.83333	3.24216	7.41667	1.45331	8.58333	1.84104	11.5	2.15761	7.41667	3.74972
8.08333	2.76726	7.58333	3.25229	8	2.75237	7.5	4.97917	8.25	2.47641	7.5	4.24269	10	4.18778	7.5	1.73669	7.5	1.10245	7.91667	4.97869	7.5	5.32381	8	3.12123	8	3.53084	9.5	2.72483	9.16667	2.24379	7.5	5.54557	7.5	1.34438	8.41667	5.04729	8.33333	3.68365	7.91667	2.95063	9.91667	3.24796	7.5	1.44196	8.66667	1.84586	11.5833	2.19451	7.5	3.81316
8.16667	2.85976	7.66667	3.16977	8.08333	2.82034	7.58333	4.99649	8.33333	2.42704	7.58333	4.36194	10.0833	4.25195	7.58333	1.69203	7.58333	1.12173	8	5.1308	7.58333	5.34366	8.08333	3.12562	8.08333	3.54727	9.58333	2.72934	9.25	2.28949	7.58333	5.62174	7.58333	1.36927	8.5	5.08406	8.41667	3.80918	8	2.99597	10	3.23646	7.58333	1.44115	8.75	1.83821	11.6667	2.23203	7.58333	3.87127
8.25	2.90921	7.75	3.19765	8.16667	2.90423	7.66667	4.99267	8.41667	2.40828	7.66667	4.42211	10.1667	4.29375	7.66667	1.63669	7.66667	1.1073	8.08333	5.16342	7.66667	5.40567	8.16667	3.1436	8.16667	3.58482	9.66667	2.77678	9.33333	2.26928	7.66667	5.69628	7.66667	1.41138	8.58333	5.1252	8.5	3.94938	8.08333	3.0753	10.0833	3.28815	7.66667	1.52086	8.83333	1.85079	11.75	2.24466	7.66667	3.92525
8.33333	2.88709	7.83333	3.24802	8.25	2.94887	7.75	5.01293	8.5	2.39417	7.75	4.56464	10.25	4.35236	7.75	1.68658	7.75	1.08795	8.16667	5.19856	7.75	5.43158	8.25	3.15026	8.25	3.7075	9.75	2.83247	9.41667	2.20514	7.75	5.73967	7.75	1.38483	8.66667	5.20765	8.58333	4.024	8.16667	3.10761	10.1667	3.42779	7.75	1.54077	8.91667	1.89585	11.8333	2.27103	7.75	3.8981
8.41667	2.86408	7.91667	3.35231	8.33333	2.91529	7.83333	5.00253	8.58333	2.42653	7.83333	4.65187	10.3333	4.36383	7.83333	1.78998	7.83333	1.07847	8.25	5.22637	7.83333	5.44333	8.33333	3.16447	8.33333	3.77185	9.83333	2.85848	9.5	2.22266	7.83333	5.78639	7.83333	1.4008	8.75	5.23066	8.66667	4.12752	8.25	3.11083	10.25	3.56743	7.83333	1.55575	9	1.89524	11.9167	2.25922	7.83333	3.91268
8.5	2.85724	8	3.39026	8.41667	2.89634	7.91667	5.04221	8.66667	2.45629	7.91667	4.70478	10.4167	4.38583	7.91667	1.86788	7.91667	1.12234	8.33333	5.2966	7.91667	5.43615	8.41667	3.17713	8.41667	3.78292	9.91667	2.86682	9.58333	2.2357	7.91667	5.85035	7.91667	1.37491	8.83333	5.2572	8.75	4.15165	8.33333	3.12681	10.3333	3.70708	7.91667	1.50111	9.08333	1.85904	12	2.27264	7.91667	3.88836
8.58333	2.8747	8.08333	3.3813	8.5	2.90099	8	5.04912	8.75	2.4277	8	4.71598	10.5	4.46582	8	1.89175	8	1.20908	8.41667	5.36877	8	5.56212	8.5	3.182	8.5	3.74713	10	2.83597	9.66667	2.26682	8	5.92712	8	1.45062	8.91667	5.31388	8.83333	4.20016	8.41667	3.16674	10.4167	3.83404	8	1.51564	9.16667	1.82372	12.0833	2.28217	8	3.90095
8.66667	2.87221	8.16667	3.39735	8.58333	2.91669	8.08333	5.10162	8.83333	2.49743	8.08333	4.77072	10.5833	4.60824	8.08333	1.85458	8.08333	1.2906	8.5	5.39453	8.08333	5.55828	8.58333	3.1735	8.58333	3.721	10.0833	2.85016	9.75	2.23776	8.08333	5.96595	8.08333	1.45856	9	5.38	8.91667	4.19525	8.5	3.1944	10.5	3.91288	8.08333	1.4758	9.25	1.83672	12.1667	2.31322	8.08333	3.88738
8.75	3.00161	8.25	3.39422	8.66667	2.91624	8.16667	5.10148	8.91667	2.57665	8.16667	4.83578	10.6667	4.73656	8.16667	1.90576	8.16667	1.3201	8.58333	5.39248	8.16667	5.55444	8.66667	3.12009	8.66667	3.67902	10.1667	2.8452	9.83333	2.17359	8.16667	6.01354	8.16667	1.47001	9.08333	5.4377	9	4.22061	8.58333	3.23612	10.5833	3.87092	8.16667	1.49506	9.33333	1.83008	12.25	2.34696	8.16667	3.928
8.83333	3.13101	8.33333	3.39333	8.75	3.04844	8.25	5.11025	9	2.64931	8.25	4.98548	10.75	4.78092	8.25	1.93462	8.25	1.34995	8.66667	5.36339	8.25	5.53074	8.75	3.08913	8.75	3.68133	10.25	2.84547	9.91667	2.15789	8.25	6.04919	8.25	1.45261	9.16667	5.51177	9.08333	4.21314	8.66667	3.30006	10.6667	3.961	8.25	1.48097	9.41667	1.83151	12.3333	2.35805	8.25	3.96842
8.91667	3.1972	8.41667	3.35724	8.83333	3.18064	8.33333	5.10885	9.08333	2.6039	8.33333	5.14332	10.8333	4.83854	8.33333	1.93694	8.33333	1.43585	8.75	5.35701	8.33333	5.42947	8.83333	3.09463	8.83333	3.67679	10.3333	2.86074	10	2.1333	8.33333	6.09953	8.33333	1.50571	9.25	5.47718	9.16667	4.20715	8.75	3.36966	10.75	4.02837	8.33333	1.50238	9.5	1.81562	12.4167	2.38028	8.33333	3.96362
9	3.20889	8.5	3.37809	8.91667	3.24341	8.41667	5.11128	9.16667	2.44736	8.41667	5.25912	10.9167	4.8783	8.41667	1.85879	8.41667	1.49105	8.83333	5.36789	8.41667	5.46587	8.91667	3.14191	8.91667	3.70902	10.4167	2.89511	10.0833	2.20314	8.41667	6.12703	8.41667	1.58429	9.33333	5.42271	9.25	4.14994	8.83333	3.41596	10.8333	4.01851	8.41667	1.57105	9.58333	1.86081	12.5	2.38545	8.41667	3.97753
9.08333	3.22178	8.58333	3.36912	9	3.2646	8.5	5.11859	9.25	2.36589	8.5	5.29247	11	4.892	8.5	1.8441	8.5	1.50764	8.91667	5.39639	8.5	5.40498	9	3.12672	9	3.71884	10.5	2.90113	10.1667	2.16829	8.5	6.1434	8.5	1.64464	9.41667	5.35513	9.33333	4.17649	8.91667	3.46191	10.9167	4.04632	8.5	1.57379	9.66667	1.90428	12.5833	2.40272	8.5	3.96675
9.16667	3.27144	8.66667	3.40042	9.08333	3.26871	8.58333	5.14179	9.33333	2.30507	8.58333	5.3278	11.0833	4.93696	8.58333	1.87872	8.58333	1.51603	9	5.42961	8.58333	5.34062	9.08333	3.13795	9.08333	3.74241	10.5833	2.90646	10.25	2.20376	8.58333	6.15991	8.58333	1.64166	9.5	5.32151	9.41667	4.17903	9	3.44603	11	4.13758	8.58333	1.58654	9.75	1.90724	12.6667	2.43854	8.58333	4.00991
9.25	3.30502	8.75	3.42249	9.16667	3.3165	8.66667	5.16337	9.41667	2.37358	8.66667	5.37434	11.1667	4.98177	8.66667	2.0119	8.66667	1.50502	9.08333	5.46495	8.66667	5.40389	9.16667	3.1267	9.16667	3.79709	10.6667	2.90526	10.3333	2.21632	8.66667	6.19319	8.66667	1.66876	9.58333	5.36519	9.5	4.25645	9.08333	3.4259	11.0833	4.21624	8.66667	1.54466	9.83333	1.88859	12.75	2.44766	8.66667	3.9641
9.33333	3.31738	8.83333	3.4949	9.25	3.35217	8.75	5.15194	9.5	2.43214	8.75	5.40054	11.25	5.13214	8.75	2.01573	8.75	1.54039	9.16667	5.45958	8.75	5.37946	9.25	3.23386	9.25	3.78829	10.75	2.97956	10.4167	2.33782	8.75	6.21906	8.75	1.67249	9.66667	5.38492	9.58333	4.29948	9.16667	3.39313	11.1667	4.24119	8.75	1.55028	9.91667	1.8704	12.8333	2.45809	8.75	4.0458
9.41667	3.29412	8.91667	3.52571	9.33333	3.37316	8.83333	5.1717	9.58333	2.47497	8.83333	5.44076	11.3333	5.28252	8.83333	2.01203	8.83333	1.58503	9.25	5.47024	8.83333	5.50929	9.33333	3.25455	9.33333	3.82321	10.8333	3.00991	10.5	2.42998	8.83333	6.22597	8.83333	1.70072	9.75	5.40578	9.66667	4.32559	9.25	3.43227	11.25	4.176	8.83333	1.55945	10	1.87659	12.9167	2.43931	8.83333	4.07969
9.5	3.2917	9	3.52513	9.41667	3.34927	8.91667	5.1886	9.66667	2.50302	8.91667	5.48934	11.4167	5.37214	8.91667	2.02175	8.91667	1.63667	9.33333	5.47631	8.91667	5.44831	9.41667	3.29983	9.41667	3.75417	10.9167	3.04094	10.5833	2.44626	8.91667	6.2021	8.91667	1.67735	9.83333	5.45824	9.75	4.37587	9.33333	3.44405	11.3333	4.15901	8.91667	1.59423	10.0833	1.86692	13	2.46948	8.91667	4.18887
9.58333	3.3616	9.08333	3.5506	9.5	3.34638	9	5.19984	9.75	2.5124	9	5.49979	11.5	5.43681	9	2.09487	9	1.7202	9.41667	5.52285	9	5.44682	9.5	3.34284	9.5	3.74891	11	3.11783	10.6667	2.41711	9	6.19626	9	1.69615	9.91667	5.51017	9.83333	4.38316	9.41667	3.44006	11.4167	4.12569	9	1.58092	10.1667	1.87983	13.0833	2.51546	9	4.22771
9.66667	3.40144	9.16667	3.55285	9.58333	3.41345	9.08333	5.16061	9.83333	2.64223	9.08333	5.52859	11.5833	5.50458	9.08333	2.16078	9.08333	1.73908	9.5	5.52486	9.08333	5.43963	9.58333	3.38833	9.58333	3.68595	11.0833	3.14918	10.75	2.36558	9.08333	6.22001	9.08333	1.71898	10	5.51339	9.91667	4.40412	9.5	3.43118	11.5	4.1631	9.08333	1.58098	10.25	1.89375	13.1667	2.6461	9.08333	4.25633
9.75	3.44042	9.25	3.61202	9.66667	3.46081	9.16667	5.12363	9.91667	2.77206	9.16667	5.574	11.6667	5.61539	9.16667	2.15998	9.16667	1.77171	9.58333	5.55353	9.16667	5.47927	9.66667	3.34043	9.66667	3.73341	11.1667	3.06832	10.8333	2.27714	9.16667	6.22374	9.16667	1.75482	10.0833	5.45105	10	4.37674	9.58333	3.44036	11.5833	4.17249	9.16667	1.57884	10.3333	1.92158	13.25	2.67683	9.16667	4.25176
9.83333	3.37367	9.33333	3.60558	9.75	3.50236	9.25	5.13317	10	2.90189	9.25	5.6905	11.75	5.64097	9.25	2.18835	9.25	1.66535	9.66667	5.55375			9.75	3.32238	9.75	3.77616	11.25	2.98746	10.9167	2.23639	9.25	6.22846	9.25	1.76239	10.1667	5.3776	10.0833	4.34212	9.66667	3.47408	11.6667	4.20117	9.25	1.61643	10.4167	1.93238	13.3333	2.67554	9.25	4.26041
9.91667	3.37164	9.41667	3.56086	9.83333	3.43914	9.33333	5.12022	10.0833	3.03172	9.33333	5.80447	11.8333	5.64651	9.33333	2.17772	9.33333	1.6522	9.75	5.58666			9.83333	3.33492	9.83333	3.77725	11.3333	2.93796	11	2.28774	9.33333	6.24048	9.33333	1.79834	10.25	5.35868	10.1667	4.33413	9.75	3.46123	11.75	4.20169	9.33333	1.64836	10.5	1.93981	13.4167	2.68675	9.33333	4.3198
10	3.32849	9.5	3.51045	9.91667	3.43589	9.41667	5.15444	10.1667	3.1011	9.41667	5.89164	11.9167	5.6361	9.41667	2.195	9.41667	1.64667	9.83333	5.57178			9.91667	3.39152	9.91667	3.79922	11.4167	2.92282	11.0833	2.36934	9.41667	6.23767	9.41667	1.86656	10.3333	5.36233	10.25	4.32308	9.83333	3.4735	11.8333	4.28999	9.41667	1.6388	10.5833	1.92851	13.5	2.80873	9.41667	4.39806
10.0833	3.31517	9.58333	3.49078	10	3.38777	9.5	5.18014	10.25	3.08852	9.5	5.99803	12	5.72031	9.5	2.23176	9.5	1.6377	9.91667	5.52229			10	3.40678	10	3.80701	11.5	2.92935	11.1667	2.40052	9.5	6.26587	9.5	1.91818	10.4167	5.44032	10.3333	4.35072	9.91667	3.45786	11.9167	4.33525	9.5	1.63731	10.6667	1.90161	13.5833	2.8354	9.5	4.44612
10.1667	3.31237	9.66667	3.53293	10.0833	3.37337	9.58333	5.18194	10.3333	3.05655	9.58333	6.07408	12.0833	5.76774	9.58333	2.24547	9.58333	1.60754	10	5.48564			10.0833	3.43872	10.0833	3.82808	11.5833	2.89731	11.25	2.41339	9.58333	6.30107	9.58333	1.91942	10.5	5.50617	10.4167	4.39848	10	3.45257	12	4.43979	9.58333	1.63513	10.75	1.88666	13.6667	2.81569	9.58333	4.48054
10.25	3.35395	9.75	3.55795	10.1667	3.37677	9.66667	5.16456	10.4167	3.07549	9.66667	6.14209	12.1667	5.87699	9.66667	2.24925	9.66667	1.61201	10.0833	5.4565			10.1667	3.46575	10.1667	3.82779	11.6667	2.86012	11.3333	2.36263	9.66667	6.36693	9.66667	1.90226	10.5833	5.55619	10.5	4.40593	10.0833	3.4653	12.0833	4.41938	9.66667	1.6381	10.8333	1.90345	13.75	2.80491	9.66667	4.50825
10.3333	3.33037	9.83333	3.5591	10.25	3.41559	9.75	5.10652	10.5	3.09198	9.75	6.20539	12.25	5.94416	9.75	2.18773	9.75	1.64328	10.1667	5.52335			10.25	3.4789	10.25	3.8453	11.75	2.83015	11.4167	2.4131	9.75	6.37887	9.75	1.90564	10.6667	5.55781	10.5833	4.43392	10.1667	3.46869	12.1667	4.42311	9.75	1.67111	10.9167	1.93026	13.8333	2.85539	9.75	4.56664
10.4167	3.31881	9.91667	3.5627	10.3333	3.40478	9.83333	5.14555	10.5833	3.10117	9.83333	6.24909	12.3333	6.04435	9.83333	2.22291	9.83333	1.65297	10.25	5.58049			10.3333	3.52123	10.3333	3.84599	11.8333	2.78043	11.5	2.45062	9.83333	6.42033	9.83333	1.9586	10.75	5.57977	10.6667	4.409	10.25	3.49426	12.25	4.33809	9.83333	1.71118	11	1.94612	13.9167	2.94569	9.83333	4.58267
10.5	3.31061	10	3.53514	10.4167	3.37826	9.91667	5.1622	10.6667	3.1124	9.91667	6.33418	12.4167	6.08736	9.91667	2.21906	9.91667	1.64548	10.3333	5.68829			10.4167	3.55843	10.4167	3.85421	11.9167	2.76202	11.5833	2.57673	9.91667	6.54903	9.91667	1.97572	10.8333	5.58214	10.75	4.44365	10.3333	3.56862	12.3333	4.24272	9.91667	1.72902	11.0833	1.97864	14	2.95856	9.91667	4.63212
10.5833	3.3262	10.0833	3.56933	10.5	3.38065	10	5.16535	10.75	3.11436	10	6.36857	12.5	6.11261	10	2.26965	10	1.66811	10.4167	5.72659			10.5	3.64004	10.5	3.82003	12	2.75712	11.6667	2.6334	10	6.67773	10	2.0193	10.9167	5.56698	10.8333	4.46213	10.4167	3.66471	12.4167	4.21075	10	1.75944	11.1667	2.00926	14.0833	2.99373	10	4.67378
10.6667	3.30735	10.1667	3.55689	10.5833	3.38449	10.0833	5.14407	10.8333	3.11812	10.0833	6.36837	12.5833	6.11488	10.0833	2.22677	10.0833	1.6297	10.5	5.74022			10.5833	3.6594	10.5833	3.86008	12.0833	2.78869	11.75	2.67658	10.0833	6.80725	10.0833	2.02168	11	5.56059	10.9167	4.54524	10.5	3.76548	12.5	4.23635	10.0833	1.74829	11.25	2.05051	14.1667	2.90407	10.0833	4.71842
10.75	3.30909	10.25	3.61379	10.6667	3.37083	10.1667	5.15104	10.9167	3.11936	10.1667	6.45928	12.6667	6.21286	10.1667	2.2419	10.1667	1.61835	10.5833	5.75267			10.6667	3.7005	10.6667	3.89122	12.1667	2.7712	11.8333	2.6624	10.1667	6.93678	10.1667	2.0726	11.0833	5.5621	11	4.57915	10.5833	3.73064	12.5833	4.29907	10.1667	1.87875	11.3333	2.07593	14.25	2.93469	10.1667	4.70426
10.8333	3.34323	10.3333	3.53603	10.75	3.37289	10.25	5.1623	11	3.15279	10.25	6.50932	12.75	6.31878	10.25	2.28182	10.25	1.72288	10.6667	5.75988			10.75	3.6856	10.75	3.89852	12.25	2.79503	11.9167	2.68715	10.25	7.03916	10.25	2.13072	11.1667	5.63187	11.0833	4.65595	10.6667	3.76849	12.6667	4.29729	10.25	1.84682	11.4167	2.11185	14.3333	2.954	10.25	4.67433
10.9167	3.31488	10.4167	3.53721	10.8333	3.4105	10.3333	5.18209	11.0833	3.20519	10.3333	6.64983	12.8333	6.40604	10.3333	2.26943	10.3333	1.8274	10.75	5.76419			10.8333	3.67164	10.8333	3.88389	12.3333	2.78045	12	2.6558	10.3333	7.14155	10.3333	2.19745	11.25	5.58853	11.1667	4.66157	10.75	3.82791	12.75	4.30017	10.3333	1.86847	11.5	2.14481	14.4167	2.98036	10.3333	4.70745
11	3.27499	10.5	3.52647	10.9167	3.39206	10.4167	5.18661	11.1667	3.21192	10.4167	6.77602	12.9167	6.38558	10.4167	2.27395	10.4167	1.87028	10.8333	5.73914			10.9167	3.65064	10.9167	3.84768	12.4167	2.86393	12.0833	2.68179	10.4167	7.2748	10.4167	2.21082	11.3333	5.56903	11.25	4.67403	10.8333	3.98001	12.8333	4.23292	10.4167	1.80476	11.5833	2.17339	14.5	3.00957	10.4167	4.75203
11.0833	3.2897	10.5833	3.59614	11	3.34684	10.5	5.18215	11.25	3.21394	10.5	6.88485	13	6.51821	10.5	2.27006	10.5	1.84011	10.9167	5.74772			11	3.65188	11	3.89025	12.5	2.84572	12.1667	2.63227	10.5	7.38504	10.5	2.19859	11.4167	5.47917	11.3333	4.64311	10.9167	4.13211	12.9167	4.26145	10.5	1.83876	11.6667	2.14359	14.5833	3.01597	10.5	4.79653
11.1667	3.42917	10.6667	3.59433	11.0833	3.37902	10.5833	5.1859	11.3333	3.20656	10.5833	6.91868	13.0833	6.65084	10.5833	2.31081	10.5833	1.80995	11	5.72012			11.0833	3.64203	11.0833	3.92284	12.5833	2.93322	12.25	2.699	10.5833	7.46244	10.5833	2.1619	11.5	5.50618	11.4167	4.64111	11	4.2842	13	4.27401	10.5833	1.82158	11.75	2.1161	14.6667	3.07697	10.5833	4.81924
11.25	3.50989	10.75	3.57657	11.1667	3.49848	10.6667	5.17313	11.4167	3.20963	10.6667	6.93364	13.1667	6.78347	10.6667	2.31795	10.6667	1.85658	11.0833	5.74521			11.1667	3.6361	11.1667	3.9201	12.6667	2.90497	12.3333	2.7334	10.6667	7.49141	10.6667	2.15722	11.5833	5.47655	11.5	4.63859	11.0833	4.41531	13.0833	4.32785	10.6667	1.81076	11.8333	2.07946	14.75	3.05108	10.6667	4.82739
11.3333	3.60558	10.8333	3.54545	11.25	3.57896	10.75	5.20474	11.5	3.20249	10.75	6.98284	13.25	6.9426	10.75	2.32366	10.75	1.9472	11.1667	5.77637			11.25	3.63025	11.25	3.92074	12.75	3.04524	12.4167	2.76263	10.75	7.55294	10.75	2.17076	11.6667	5.43845	11.5833	4.66444	11.1667	4.40404	13.1667	4.31483	10.75	1.83932	11.9167	2.09122	14.8333	3.04531	10.75	4.83485
11.4167	3.62113	10.9167	3.52077	11.3333	3.65959	10.8333	5.18614	11.5833	3.21407	10.8333	7.07684	13.3333	7.03666	10.8333	2.34368	10.8333	2.01985	11.25	5.82139			11.3333	3.65305	11.3333	3.89664	12.8333	3.04089	12.5	2.74887	10.8333	7.608	10.8333	2.21074	11.75	5.39516	11.6667	4.76712	11.25	4.3858	13.25	4.33001	10.8333	1.90202	12	2.10248	14.9167	3.00956	10.8333	4.85544
11.5	3.66635	11	3.51776	11.4167	3.6855	10.9167	5.18376	11.6667	3.23843	10.9167	7.15482	13.4167	7.12404	10.9167	2.41511	10.9167	2.10557	11.3333	5.8598			11.4167	3.68114	11.4167	3.92102	12.9167	3.13913	12.5833	2.68696	10.9167	7.67419	10.9167	2.2191	11.8333	5.35613	11.75	4.88348	11.3333	4.32188	13.3333	4.34911	10.9167	1.94695	12.0833	2.10732	15	3.00528	10.9167	4.90661
11.5833	3.71747	11.0833	3.55281	11.5	3.72668	11	5.19337	11.75	3.26124	11	7.20071	13.5	7.19435	11	2.40297	11	2.13382	11.4167	5.83486			11.5	3.687	11.5	3.86425	13	3.12597	12.6667	2.61013	11	7.7085	11	2.18038	11.9167	5.41484	11.8333	4.93702	11.4167	4.33371	13.4167	4.3714	11	2.00502	12.1667	2.12138	15.0833	2.97758	11	5.02415
11.6667	3.77095	11.1667	3.56934	11.5833	3.75464	11.0833	5.17292	11.8333	3.26994	11.0833	7.24155	13.5833	7.27582	11.0833	2.45885	11.0833	2.22449	11.5	5.86417			11.5833	3.71268	11.5833	3.87537	13.0833	3.1481	12.75	2.63442	11.0833	7.75518	11.0833	2.14229	12	5.41884	11.9167	5.01008	11.5	4.36605	13.5	4.40182	11.0833	2.02233	12.25	2.10713	15.1667	3.00281	11.0833	5.10935
11.75	3.80797	11.25	3.55055	11.6667	3.82089	11.1667	5.16904	11.9167	3.24955	11.1667	7.30942	13.6667	7.32795	11.1667	2.42426	11.1667	2.22917	11.5833	5.84862			11.6667	3.72178	11.6667	3.89402	13.1667	3.14478	12.8333	2.69487	11.1667	7.80337	11.1667	2.14296	12.0833	5.45039	12	5.03174	11.5833	4.41243	13.5833	4.42016	11.1667	2.03102	12.3333	2.10846	15.25	2.98799	11.1667	5.18132
11.8333	3.82307	11.3333	3.50413	11.75	3.84112	11.25	5.14148	12	3.26717	11.25	7.40629	13.75	7.36509	11.25	2.42362	11.25	2.21049	11.6667	5.86166			11.75	3.75359	11.75	4.03465	13.25	3.23079	12.9167	2.73376	11.25	7.88127	11.25	2.17427	12.1667	5.40249	12.0833	5.07425	11.6667	4.44642	13.6667	4.41	11.25	2.0323	12.4167	2.10985	15.3333	3.00232	11.25	5.21013
11.9167	3.81289	11.4167	3.51384	11.8333	3.85567	11.3333	5.16637	12.0833	3.2679	11.3333	7.49041	13.8333	7.42891	11.3333	2.42183	11.3333	2.11337	11.75	5.85759			11.8333	3.77683	11.8333	4.12665	13.3333	3.2329	13	2.77617	11.3333	7.95609	11.3333	2.17127	12.25	5.5512	12.1667	5.07833	11.75	4.466	13.75	4.41191	11.3333	2.04951	12.5	2.12676	15.4167	2.96921	11.3333	5.28914
12	3.80317	11.5	3.49998	11.9167	3.84664	11.4167	5.18615	12.1667	3.29017	11.4167	7.54131	13.9167	7.50402	11.4167	2.41178	11.4167	2.04164	11.8333	5.80664			11.9167	3.80823	11.9167	4.24457	13.4167	3.20448	13.0833	2.85455	11.4167	7.97606	11.4167	2.21191	12.3333	5.69991	12.25	5.14145	11.8333	4.52054	13.8333	4.43952	11.4167	2.07874	12.5833	2.13952	15.5	2.96666	11.4167	5.26445
12.0833	3.82781	11.5833	3.51582	12	3.84412	11.5	5.19047	12.25	3.27836	11.5	7.6168	14	7.60818	11.5	2.45245	11.5	1.94432	11.9167	5.78139			12	3.87047	12	4.26516	13.5	3.12573	13.1667	2.87876	11.5	8.01057	11.5	2.18397	12.4167	5.84861	12.3333	5.17946	11.9167	4.55909	13.9167	4.451	11.5	2.09094	12.6667	2.21673	15.5833	2.89108	11.5	5.18897
12.1667	3.72127	11.6667	3.52041	12.0833	3.88515	11.5833	5.21894	12.3333	3.32771	11.5833	7.6727	14.0833	7.64114	11.5833	2.48885	11.5833	1.99821	12	5.79638			12.0833	3.91065	12.0833	4.32257	13.5833	3.13893	13.25	2.84642	11.5833	8.10022	11.5833	2.24611	12.5	5.99732	12.4167	5.20862	12	4.61587	14	4.49231	11.5833	2.11763	12.75	2.23975	15.6667	2.97678	11.5833	5.11216
12.25	3.72738	11.75	3.55825	12.1667	3.78616	11.6667	5.20142	12.4167	3.33917	11.6667	7.74093	14.1667	7.67642	11.6667	2.5375	11.6667	2.12712	12.0833	5.87366			12.1667	3.94085	12.1667	4.32512	13.6667	3.15939	13.3333	2.81476	11.6667	8.22005	11.6667	2.21633	12.5833	6.14602	12.5	5.17144	12.0833	4.66242	14.0833	4.46323	11.6667	2.09562	12.8333	2.28495	15.75	3.03618	11.6667	5.09764
12.3333	3.65389	11.8333	3.56051	12.25	3.78385	11.75	5.20814	12.5	3.34804	11.75	7.77208	14.25	7.73777	11.75	2.52986	11.75	2.22621	12.1667	6.01008			12.25	3.94711	12.25	4.35779	13.75	3.2157	13.4167	2.7578	11.75	8.29404	11.75	2.27918	12.6667	6.01961	12.5833	5.19736	12.1667	4.71209	14.1667	4.47139	11.75	2.08566	12.9167	2.31126	15.8333	3.07136	11.75	5.19457
12.4167	3.75859	11.9167	3.5674	12.3333	3.71816	11.8333	5.19778	12.5833	3.29419	11.8333	7.83208	14.3333	7.87814	11.8333	2.49743	11.8333	2.26839	12.25	6.14651			12.3333	3.9377	12.3333	4.33128	13.8333	3.20605	13.5	2.7257	11.8333	8.36662	11.8333	2.25223	12.75	5.8932	12.6667	5.22583	12.25	4.67762	14.25	4.44716	11.8333	2.08209	13	2.36038	15.9167	3.03944	11.8333	5.30056
12.5	3.78405	12	3.58423	12.4167	3.78534	11.9167	5.23019	12.6667	3.29363	11.9167	7.95143	14.4167	7.97997	11.9167	2.48937	11.9167	2.27717	12.3333	6.28293			12.4167	3.9455	12.4167	4.29413	13.9167	3.1772	13.5833	2.73268	11.9167	8.4145	11.9167	2.27342	12.8333	5.76678	12.75	5.34839	12.3333	4.62508	14.3333	4.4548	11.9167	2.07978	13.0833	2.40051	16	3.08505	11.9167	5.35228
12.5833	3.88444	12.0833	3.61818	12.5	3.82214	12	5.25278	12.75	3.32813	12	8.0756	14.5	8.0897	12	2.47958	12	2.28314	12.4167	6.41935			12.5	3.96883	12.5	4.28183	14	3.16011	13.6667	2.77063	12	8.44839	12	2.2908	12.9167	5.64037	12.8333	5.3825	12.4167	4.54192	14.4167	4.45877	12	2.11693	13.1667	2.34241	16.0833	3.1708	12	5.35469
12.6667	3.96581	12.1667	3.57732	12.5833	3.94513	12.0833	5.28345	12.8333	3.38805	12.0833	8.21071	14.5833	8.12251	12.0833	2.46419	12.0833	2.30705	12.5	6.51185			12.5833	4.01148	12.5833	4.30501	14.0833	3.16373	13.75	2.81704	12.0833	8.39144	12.0833	2.31175	13	5.51395			12.5	4.55413	14.5	4.48999	12.0833	2.12854	13.25	2.36007	16.1667	3.16722	12.0833	5.34498
12.75	3.98355	12.25	3.5632	12.6667	4.01071	12.1667	5.28696	12.9167	3.42804	12.1667	8.25356	14.6667	8.19996	12.1667	2.39542	12.1667	2.31618	12.5833	6.53379			12.6667	4.03738	12.6667	4.3014	14.1667	3.22298	13.8333	2.83949	12.1667	8.40813	12.1667	2.34423	13.0833	5.40205			12.5833	4.57021	14.5833	4.50117	12.1667	2.17105	13.3333	2.37652	16.25	3.15037	12.1667	5.34828
12.8333	4.04206	12.3333	3.48607	12.75	4.01963	12.25	5.33453	13	3.45885	12.25	8.28525	14.75	8.23866	12.25	2.37767	12.25	2.30014	12.6667	6.47381			12.75	4.03939	12.75	4.32127	14.25	3.2199	13.9167	2.84563	12.25	8.56176	12.25	2.35363	13.1667	5.34309			12.6667	4.64247	14.6667	4.52901	12.25	2.1652	13.4167	2.44633	16.3333	3.23452	12.25	5.37373
12.9167	4.0968	12.4167	3.46015	12.8333	4.06189	12.3333	5.33667	13.0833	3.44391	12.3333	8.33709	14.8333	8.39038	12.3333	2.38434	12.3333	2.27296	12.75	6.47655			12.8333	4.05415	12.8333	4.3226	14.3333	3.22308	14	2.88605	12.3333	8.71539	12.3333	2.36229	13.25	5.30258			12.75	4.63319	14.75	4.51899	12.3333	2.21037	13.5	2.43605	16.4167	3.20923	12.3333	5.40341
13	4.13985	12.5	3.44882	12.9167	4.13882	12.4167	5.34652	13.1667	3.45546	12.4167	8.39894	14.9167	8.50783	12.4167	2.4373	12.4167	2.2458	12.8333	6.42452			12.9167	4.03706	12.9167	4.34717	14.4167	3.23232	14.0833	2.89274	12.4167	8.86903	12.4167	2.36906	13.3333	5.35697			12.8333	4.64854	14.8333	4.52451	12.4167	2.25113	13.5833	2.39398	16.5	3.28561	12.4167	5.47659
13.0833	4.05342	12.5833	3.47509	13	4.17668	12.5	5.33503	13.25	3.43016	12.5	8.52363	15	8.51377	12.5	2.50056	12.5	2.27988	12.9167	6.35903			13	4.01249	13	4.36381	14.5	3.27663	14.1667	2.91563	12.5	8.9161	12.5	2.32583	13.4167	5.3373			12.9167	4.65711	14.9167	4.52334	12.5	2.28359	13.6667	2.3729	16.5833	3.29966	12.5	5.61279
13.1667	4.06972	12.6667	3.4959	13.0833	4.08773	12.5833	5.34195	13.3333	3.47147	12.5833	8.58971	15.0833	8.3943	12.5833	2.52958	12.5833	2.27396	13	6.29355			13.0833	3.99517	13.0833	4.4245	14.5833	3.27601	14.25	2.91146	12.5833	8.91226	12.5833	2.33095	13.5	5.34162			13	4.7093	15	4.53051	12.5833	2.2886	13.75	2.41985	16.6667	3.39465	12.5833	5.69589
13.25	4.04072	12.75	3.47115	13.1667	4.10151	12.6667	5.31182	13.4167	3.49783	12.6667	8.61418	15.1667	8.25762	12.6667	2.51942	12.6667	2.28852	13.0833	6.2197			13.1667	4.00177	13.1667	4.46713	14.6667	3.27454	14.3333	2.94122	12.6667	8.84569	12.6667	2.31563	13.5833	5.39374			13.0833	4.71467	15.0833	4.51494	12.6667	2.32495	13.8333	2.46092	16.75	3.41026	12.6667	5.77807
13.3333	4.11583	12.8333	3.5072	13.25	4.09135	12.75	5.3068	13.5	3.57085	12.75	8.66866	15.25	8.27448	12.75	2.50437	12.75	2.28814	13.1667	6.21578			13.25	3.99416	13.25	4.50919	14.75	3.24334	14.4167	2.95654	12.75	8.772	12.75	2.33792	13.6667	5.51809			13.1667	4.72193	15.1667	4.53537	12.75	2.35207	13.9167	2.49047	16.8333	3.41054	12.75	5.7825
13.4167	4.10136	12.9167	3.61421	13.3333	4.15295	12.8333	5.33011	13.5833	3.57347	12.8333	8.72556	15.3333	8.35266	12.8333	2.51845	12.8333	2.34789	13.25	6.21187			13.3333	3.99156	13.3333	4.54096	14.8333	3.21994	14.5	2.97696	12.8333	8.71588	12.8333	2.35905	13.75	5.60734			13.25	4.73356	15.25	4.56535	12.8333	2.41086	14	2.49038	16.9167	3.38289	12.8333	5.83371
13.5	4.12139	13	3.63075	13.4167	4.13206	12.9167	5.35888	13.6667	3.57523	12.9167	8.76641	15.4167	8.40273	12.9167	2.51116	12.9167	2.40432	13.3333	6.20332			13.4167	3.98199	13.4167	4.63603	14.9167	3.17586	14.5833	3.01317	12.9167	8.79864	12.9167	2.36646	13.8333	5.54046			13.3333	4.78142	15.3333	4.58212	12.9167	2.48239	14.0833	2.51251	17	3.40091	12.9167	5.83516
13.5833	4.14911	13.0833	3.63051	13.5	4.17186	13	5.35005	13.75	3.55349	13	8.76117	15.5	8.42691	13	2.65826	13	2.40142	13.4167	6.24181			13.5	3.98526	13.5	4.66397	15	3.14235	14.6667	3.05995	13	8.89381	13	2.3771	13.9167	5.50797			13.4167	4.82248	15.4167	4.55829	13	2.51435	14.1667	2.51944	17.0833	3.39485	13	5.95814
13.6667	4.18512	13.1667	3.57692	13.5833	4.20794	13.0833	5.3588	13.8333	3.54601	13.0833	8.82631	15.5833	8.57909	13.0833	2.80536	13.0833	2.35862	13.5	6.18442			13.5833	3.95974	13.5833	4.67593	15.0833	3.14192	14.75	3.10749	13.0833	9.00853	13.0833	2.3842	14	5.41988			13.5	4.82992	15.5	4.57464	13.0833	2.54361	14.25	2.62005	17.1667	3.46297	13.0833	5.95102
13.75	4.27399	13.25	3.60881	13.6667	4.2445	13.1667	5.35911	13.9167	3.55804	13.1667	8.92592	15.6667	8.73127	13.1667	2.95246	13.1667	2.29461	13.5833	6.20732			13.6667	4.00378	13.6667	4.70513	15.1667	3.08833	14.8333	3.12473	13.1667	8.99538	13.1667	2.40707	14.0833	5.44665			13.5833	4.80297	15.5833	4.63925	13.1667	2.55801	14.3333	2.64787	17.25	3.49625	13.1667	6.03021
13.8333	4.21842	13.3333	3.64856	13.75	4.29642	13.25	5.38174	14	3.55039	13.25	8.99652	15.75	8.88345	13.25	3.00069	13.25	2.31606	13.6667	6.2048			13.75	3.99791	13.75	4.7083	15.25	3.07954	14.9167	3.12322	13.25	9.05705	13.25	2.42779	14.1667	5.4398			13.6667	4.7697	15.6667	4.68707	13.25	2.60437	14.4167	2.65208	17.3333	3.50219	13.25	6.0293
13.9167	4.14741	13.4167	3.6671	13.8333	4.25689	13.3333	5.36319	14.0833	3.54564	13.3333	8.98851	15.8333	8.99186	13.3333	3.07941	13.3333	2.33665	13.75	6.1715			13.8333	4.02303	13.8333	4.73563	15.3333	3.08123	15	3.14153	13.3333	9.10642	13.3333	2.40876	14.25	5.49148			13.75	4.78087	15.75	4.70399	13.3333	2.63761	14.5	2.562	17.4167	3.48217	13.3333	6.08203
14	4.0381	13.5	3.72641	13.9167	4.16481	13.4167	5.37324	14.1667	3.51192	13.4167	8.92132	15.9167	9.07683	13.4167	3.09821	13.4167	2.38321	13.8333	6.12049			13.9167	3.98357	13.9167	4.7101	15.4167	3.0854	15.0833	3.16033	13.4167	9.13984	13.4167	2.4264	14.3333	5.64922			13.8333	4.76699	15.8333	4.69006	13.4167	2.67163	14.5833	2.51434	17.5	3.48954	13.4167	6.09918
14.0833	3.99509	13.5833	3.74481	14	4.08383	13.5	5.37052	14.25	3.51154	13.5	8.92259	16	9.15991	13.5	3.14181	13.5	2.34153	13.9167	6.13254			14	3.99768	14	4.73509	15.5	3.07991	15.1667	3.18379	13.5	9.20615	13.5	2.41928	14.4167	5.80697			13.9167	4.79069	15.9167	4.74393	13.5	2.68255	14.6667	2.46371	17.5833	3.5403	13.5	6.13107
14.1667	4.02116	13.6667	3.75172	14.0833	4.03185	13.5833	5.35963	14.3333	3.52025	13.5833	8.93822	16.0833	9.18341	13.5833	3.08726	13.5833	2.33495	14	6.2608			14.0833	3.97184	14.0833	4.72977	15.5833	3.11465	15.25	3.17422	13.5833	9.2562	13.5833	2.43202	14.5	5.96471			14	4.76806	16	4.79149	13.5833	2.68648	14.75	2.48354	17.6667	3.52466	13.5833	6.15551
14.25	4.0492	13.75	3.7017	14.1667	4.07687	13.6667	5.3594	14.4167	3.53626	13.6667	8.95618	16.1667	9.24436	13.6667	3.11401	13.6667	2.29727	14.0833	6.39487			14.1667	3.94069	14.1667	4.77972	15.6667	3.13848	15.3333	3.20381	13.6667	9.26605	13.6667	2.38572	14.5833	6.12246			14.0833	4.76266	16.0833	4.85866	13.6667	2.70095	14.8333	2.46403	17.75	3.53395	13.6667	6.1622
14.3333	4.07703	13.8333	3.67063	14.25	4.09195	13.75	5.35491	14.5	3.53412	13.75	8.94342	16.25	9.29019	13.75	3.15303	13.75	2.34424	14.1667	6.28333			14.25	3.94022	14.25	4.87579	15.75	3.21371	15.4167	3.28172	13.75	9.42019	13.75	2.34019	14.6667	6.14938			14.1667	4.75135	16.1667	4.91044	13.75	2.68656	14.9167	2.47377	17.8333	3.57434	13.75	6.19639
14.4167	4.01454	13.9167	3.66116	14.3333	4.12307	13.8333	5.3523	14.5833	3.54925	13.8333	8.9717	16.3333	9.37605	13.8333	3.15282	13.8333	2.31993	14.25	6.28413			14.3333	3.96597	14.3333	4.97764	15.8333	3.21366	15.5	3.31593	13.8333	9.57434	13.8333	2.32138	14.75	6.22067			14.25	4.7302	16.25	4.95778	13.8333	2.69535	15	2.44173	17.9167	3.61131	13.8333	6.22411
14.5	4.0021	14	3.67882	14.4167	4.06018	13.9167	5.4074	14.6667	3.55717	13.9167	9.0147	16.4167	9.4481	13.9167	3.11895	13.9167	2.35501	14.3333	6.21839			14.4167	3.98351	14.4167	5.04558	15.9167	3.30122	15.5833	3.35298	13.9167	9.72848	13.9167	2.33591	14.8333	6.10737			14.3333	4.78804	16.3333	4.98385	13.9167	2.68758	15.0833	2.43863	18	3.60794	13.9167	6.24859
14.5833	3.99464	14.0833	3.70906	14.5	4.05828	14	5.46412	14.75	3.58602	14	9.03969	16.5	9.53958	14	3.11384	14	2.35591	14.4167	6.30209			14.5	4.02141	14.5	5.06327	16	3.29123	15.6667	3.39722	14	9.88262	14	2.34579	14.9167	6.11276			14.4167	4.78527	16.4167	5.02497	14	2.73286	15.1667	2.46629	18.0833	3.56334	14	6.2834
14.6667	4.04757	14.1667	3.70652	14.5833	4.06223	14.0833	5.49691	14.8333	3.58831	14.0833	9.0496	16.5833	9.5746	14.0833	3.1394	14.0833	2.40453	14.5	6.41698			14.5833	4.03327	14.5833	5.06117	16.0833	3.27701	15.75	3.47019	14.0833	9.92	14.0833	2.33963	15	6.11814			14.5	4.83795	16.5	5.05571	14.0833	2.73266	15.25	2.49359	18.1667	3.60828	14.0833	6.33147
14.75	4.01324	14.25	3.70151	14.6667	4.11135	14.1667	5.46586	14.9167	3.60794	14.1667	9.07425	16.6667	9.60159	14.1667	3.14319	14.1667	2.39968	14.5833	6.53188			14.6667	4.07392	14.6667	5.07494	16.1667	3.26676	15.8333	3.50226	14.1667	10.0341	14.1667	2.34362	15.0833	6.17408			14.5833	4.8355	16.5833	5.06494	14.1667	2.73189	15.3333	2.57975	18.25	3.59239	14.1667	6.39951
14.8333	3.96122	14.3333	3.7618	14.75	4.09321	14.25	5.39984	15	3.60289	14.25	9.13353	16.75	9.61458	14.25	3.12661	14.25	2.408	14.6667	6.50931			14.75	4.10002	14.75	5.12523	16.25	3.22106	15.9167	3.47025	14.25	10.1481	14.25	2.35718	15.1667	6.25446			14.6667	4.85657	16.6667	5.04841	14.25	2.72759	15.4167	2.6215	18.3333	3.66175	14.25	6.42669
14.9167	3.89101	14.4167	3.81814	14.8333	4.03816	14.3333	5.4118	15.0833	3.60663	14.3333	9.1738	16.8333	9.68011	14.3333	3.14201	14.3333	2.4362	14.75	6.48572			14.8333	4.10608	14.8333	5.17955	16.3333	3.2073	16	3.45832	14.3333	10.2622	14.3333	2.37984	15.25	6.2304			14.75	4.84875	16.75	5.06672	14.3333	2.73735	15.5	2.63569	18.4167	3.65375	14.3333	6.47517
15	3.90345	14.5	3.83672	14.9167	3.98744	14.4167	5.46586	15.1667	3.59455	14.4167	9.21219	16.9167	9.72546	14.4167	3.13953	14.4167	2.43709	14.8333	6.50368			14.9167	4.11646	14.9167	5.2175	16.4167	3.16802	16.0833	3.50155	14.4167	10.3149	14.4167	2.39094	15.3333	6.2274			14.8333	4.83238	16.8333	5.12494	14.4167	2.74052	15.5833	2.63443	18.5	3.72728	14.4167	6.51721
15.0833	3.95206	14.5833	3.80339	15	3.98111	14.5	5.52839	15.25	3.57769	14.5	9.23492	17	9.82456	14.5	3.29872	14.5	2.42548	14.9167	6.6191			15	4.10946	15	5.22802	16.5	3.19123	16.1667	3.56402	14.5	10.3601	14.5	2.40579	15.4167	6.25298			14.9167	4.83563	16.9167	5.17628	14.5	2.7482	15.6667	2.61698	18.5833	3.73465	14.5	6.58337
15.1667	4.02727	14.6667	3.83217	15.0833	4.03243	14.5833	5.53109	15.3333	3.55875	14.5833	9.32716	17.0833	9.87657	14.5833	3.38319	14.5833	2.43512	15	6.47766			15.0833	4.10103	15.0833	5.2534	16.5833	3.19072	16.25	3.5978	14.5833	10.397	14.5833	2.41507	15.5	6.16963			15	4.85439	17	5.19748	14.5833	2.79695	15.75	2.6406	18.6667	3.73543	14.5833	6.63643
15.25	4.18049	14.75	3.82624	15.1667	4.0964	14.6667	5.52483	15.4167	3.54379	14.6667	9.37347	17.1667	9.96196	14.6667	3.34761	14.6667	2.50211	15.0833	6.32046			15.1667	4.10094	15.1667	5.22963	16.6667	3.197	16.3333	3.59313	14.6667	10.4284	14.6667	2.42769	15.5833	6.16707			15.0833	4.82887	17.0833	5.17109	14.6667	2.78349	15.8333	2.61713	18.75	3.69047	14.6667	6.66604
15.3333	4.33371	14.8333	3.82142	15.25	4.16746	14.75	5.59089	15.5	3.53461	14.75	9.41668	17.25	9.97181	14.75	3.20703	14.75	2.57965	15.1667	6.46896			15.25	4.10895	15.25	5.21797	16.75	3.20314	16.4167	3.56345	14.75	10.4497	14.75	2.46625	15.6667	6.09211			15.1667	4.80532	17.1667	5.22456	14.75	2.81408	15.9167	2.59336	18.8333	3.66372	14.75	6.65257
15.4167	4.48694	14.9167	3.79289	15.3333	4.21411	14.8333	5.69228	15.5833	3.52265	14.8333	9.42212	17.3333	10.0083	14.8333	3.12124	14.8333	2.59084	15.25	6.61747			15.3333	4.10651	15.3333	5.14115	16.8333	3.23436	16.5	3.56604	14.8333	10.4477	14.8333	2.48314	15.75	5.97485			15.25	4.7812	17.25	5.17978	14.8333	2.79467	16	2.56316	18.9167	3.67608	14.8333	6.6534
15.5	4.64016	15	3.81481	15.4167	4.28486	14.9167	5.6578	15.6667	3.51935	14.9167	9.43303	17.4167	10.0187	14.9167	3.1886	14.9167	2.62279	15.3333	6.65584			15.4167	4.08844	15.4167	5.13735	16.9167	3.21788	16.5833	3.56594	14.9167	10.4621	14.9167	2.49764	15.8333	5.85759			15.3333	4.82251	17.3333	5.17382	14.9167	2.8521	16.0833	2.63482	19	3.72998	14.9167	6.63041
15.5833	4.79338	15.0833	3.78174			15	5.65294	15.75	3.50856	15	9.44198	17.5	10.1374	15	3.27139	15	2.74427	15.4167	6.54364			15.5	4.0499	15.5	5.14321	17	3.21751	16.6667	3.58482	15	10.5116	15	2.47599	15.9167	5.74033			15.4167	4.82449	17.4167	5.17567	15	2.81087	16.1667	2.67298	19.0833	3.72625	15	6.66022
		15.1667	3.7746			15.0833	5.55773	15.8333	3.53531	15.0833	9.4287	17.5833	10.2413	15.0833	3.2722	15.0833	2.7877	15.5	6.4045			15.5833	4.04709	15.5833	5.20776	17.0833	3.22681	16.75	3.57686	15.0833	10.6247	15.0833	2.45464	16	5.69432			15.5	4.85051	17.5	5.24448	15.0833	2.76798	16.25	2.68826	19.1667	3.68933	15.0833	6.63669
		15.25	3.87761			15.1667	5.5543	15.9167	3.53171	15.1667	9.45269	17.6667	10.2992	15.1667	3.2565	15.1667	2.84355	15.5833	6.26491			15.6667	4.00137	15.6667	5.21663	17.1667	3.18641	16.8333	3.57334	15.1667	10.6951	15.1667	2.47314	16.0833	5.74864			15.5833	4.84144	17.5833	5.30105	15.1667	2.70373	16.3333	2.63576	19.25	3.66575	15.1667	6.6863
		15.3333	3.93963			15.25	5.53399	16	3.54618	15.25	9.4704	17.75	10.3283	15.25	3.25248	15.25	2.81476	15.6667	6.38569			15.75	3.98308	15.75	5.20481	17.25	3.10177	16.9167	3.58918	15.25	10.6974	15.25	2.49432	16.1667	5.83113			15.6667	4.86082	17.6667	5.26261	15.25	2.68519	16.4167	2.64055	19.3333	3.62409	15.25	6.68688
		15.4167	4.01133			15.3333	5.57129	16.0833	3.52375	15.3333	9.51674	17.8333	10.3622	15.3333	3.26704	15.3333	2.88725	15.75	6.50647			15.8333	3.98895	15.8333	5.17233	17.3333	3.08787	17	3.61116	15.3333	10.7295	15.3333	2.52484	16.25	5.71432			15.75	4.87638	17.75	5.29209	15.3333	2.67741	16.5	2.66991	19.4167	3.65537	15.3333	6.70009
		15.5	3.97458			15.4167	5.57732	16.1667	3.54698	15.4167	9.52353	17.9167	10.4112	15.4167	3.30036	15.4167	2.94444	15.8333	6.62725			15.9167	4.00774	15.9167	5.1907	17.4167	3.07397	17.0833	3.60135	15.4167	10.7682	15.4167	2.48542	16.3333	5.5975			15.8333	4.87801	17.8333	5.30935	15.4167	2.7182	16.5833	2.65292	19.5	3.65435	15.4167	6.61581
		15.5833	3.99469			15.5	5.5687	16.25	3.55363	15.5	9.54771	18	10.4514	15.5	3.32826	15.5	3.0315	15.9167	6.65129			16	4.00327	16	5.18346	17.5	2.99912	17.1667	3.58088	15.5	10.8264	15.5	2.48819	16.4167	5.6526			15.9167	4.8954	17.9167	5.29527	15.5	2.75013	16.6667	2.66197	19.5833	3.67852	15.5	6.58591
		15.6667	3.99559			15.5833	5.54574	16.3333	3.56806	15.5833	9.5559	18.0833	10.4832	15.5833	3.37919	15.5833	3.08694	16	6.671			16.0833	4.00353	16.0833	5.18691	17.5833	2.92427	17.25	3.55001	15.5833	10.8568	15.5833	2.48618	16.5	5.70771			16	4.87076	18	5.30937	15.5833	2.83568	16.75	2.61107	19.6667	3.66935	15.5833	6.60213
		15.75	3.97121			15.6667	5.61252	16.4167	3.54945	15.6667	9.62265	18.1667	10.5739	15.6667	3.42799	15.6667	3.17955	16.0833	6.69072			16.1667	4.04815	16.1667	5.17318	17.6667	2.84943	17.3333	3.57029	15.6667	10.9046	15.6667	2.52988	16.5833	5.85583			16.0833	4.88491	18.0833	5.46341	15.6667	2.87166	16.8333	2.61682	19.75	3.6383	15.6667	6.62432
		15.8333	3.93136			15.75	5.59021	16.5	3.53037	15.75	9.64511	18.25	10.721	15.75	3.44789	15.75	3.25438	16.1667	6.71044			16.25	4.05446	16.25	5.22954	17.75	2.92317	17.4167	3.5945	15.75	10.972	15.75	2.51696	16.6667	6.00395			16.1667	4.89719	18.1667	5.61744	15.75	2.9369	16.9167	2.59436	19.8333	3.65451	15.75	6.67671
		15.9167	3.97088			15.8333	5.57043	16.5833	3.51501	15.8333	9.68251	18.3333	10.8682	15.8333	3.46353	15.8333	3.31335	16.25	6.73015			16.3333	4.05578	16.3333	5.22748	17.8333	2.99692	17.5	3.6206	15.8333	11.0957	15.8333	2.52462	16.75	6.09525			16.25	4.93057	18.25	5.69187	15.8333	2.97662	17	2.63002	19.9167	3.65727	15.8333	6.77417
		16	4.00257			15.9167	5.52759	16.6667	3.53249	15.9167	9.67582	18.4167	10.9164	15.9167	3.45524	15.9167	3.28238	16.3333	6.66529			16.4167	4.038	16.4167	5.23014	17.9167	3.07067	17.5833	3.62996	15.9167	11.2059	15.9167	2.52858	16.8333	6.13191			16.3333	4.97002	18.3333	5.77534	15.9167	2.99488	17.0833	2.59599	20	3.6945	15.9167	6.84811
		16.0833	4.08175			16	5.65211	16.75	3.51747	16	9.71403	18.5	10.9842	16	3.56892	16	3.27759	16.4167	6.63466			16.5	4.06509	16.5	5.1959	18	3.15868	17.6667	3.6139	16	11.3471	16	2.57593	16.9167	6.22954			16.4167	4.95216	18.4167	5.73503	16	2.99864	17.1667	2.61275	20.0833	3.68657	16	6.87752
		16.1667	4.08878			16.0833	5.69186	16.8333	3.5687	16.0833	9.74968	18.5833	11.0437	16.0833	3.69729	16.0833	3.28246	16.5	6.57593			16.5833	4.08694	16.5833	5.20395	18.0833	3.19002	17.75	3.60645	16.0833	11.4027	16.0833	2.60808	17	6.2191			16.5	4.93608	18.5	5.85104	16.0833	2.98882	17.25	2.59808	20.1667	3.67402	16.0833	6.90727
		16.25	4.10374			16.1667	5.72117	16.9167	3.58216	16.1667	9.80992	18.6667	11.0956	16.1667	3.81347	16.1667	3.37516	16.5833	6.67234			16.6667	4.07122	16.6667	5.2125	18.1667	3.21381	17.8333	3.59537	16.1667	11.4164	16.1667	2.61586	17.0833	6.28183			16.5833	4.89909	18.5833	5.85674	16.1667	3.01018	17.3333	2.64547	20.25	3.64955	16.1667	6.95746
		16.3333	4.14255			16.25	5.67737	17	3.60678	16.25	9.84654	18.75	11.1467	16.25	3.86802	16.25	3.40275	16.6667	6.76874			16.75	4.02901	16.75	5.19592	18.25	3.19149	17.9167	3.61181	16.25	11.4515	16.25	2.59909	17.1667	6.27831			16.6667	4.9067	18.6667	5.70099	16.25	2.95805	17.4167	2.66424	20.3333	3.67431	16.25	7.03251
		16.4167	4.19022			16.3333	5.66615	17.0833	3.56337	16.3333	9.88287	18.8333	11.214	16.3333	3.88143	16.3333	3.4647					16.8333	4.00981	16.8333	5.22298	18.3333	3.14171	18	3.60968	16.3333	11.4851	16.3333	2.58368	17.25	6.28478			16.75	4.9034	18.75	5.54523	16.3333	2.99073	17.5	2.69199	20.4167	3.69094	16.3333	7.07478
		16.5	4.20584			16.4167	5.61459	17.1667	3.53593	16.4167	9.95409	18.9167	11.3041	16.4167	3.83738	16.4167	3.47127					16.9167	4.00326	16.9167	5.2255	18.4167	3.1414	18.0833	3.62749	16.4167	11.4914	16.4167	2.58122	17.3333	6.26496			16.8333	4.89093	18.8333	5.38947	16.4167	2.99334	17.5833	2.72126	20.5	3.74179	16.4167	7.0844
		16.5833	4.22679			16.5	5.58352	17.25	3.53751	16.5	9.96016	19	11.372	16.5	3.87824	16.5	3.52221					17	4.04524	17	5.25271	18.5	3.20812	18.1667	3.64334	16.5	11.4114	16.5	2.58203	17.4167	6.29119			16.9167	4.87699	18.9167	5.42467	16.5	3.03312	17.6667	2.72012	20.5833	3.72274	16.5	7.0501
		16.6667	4.24861			16.5833	5.54893	17.3333	3.55682	16.5833	9.97634	19.0833	11.4374	16.5833	3.99222	16.5833	3.49166					17.0833	4.06568	17.0833	5.22848	18.5833	3.25601	18.25	3.65454	16.5833	11.3009	16.5833	2.59041	17.5	6.28511			17	4.82533	19	5.43719	16.5833	3.02319	17.75	2.728	20.6667	3.78302	16.5833	7.00729
		16.75	4.2529			16.6667	5.60904	17.4167	3.56838	16.6667	9.96309	19.1667	11.4936	16.6667	4.11804	16.6667	3.51492					17.1667	4.10415	17.1667	5.2239	18.6667	3.25229	18.3333	3.63079	16.6667	11.2314	16.6667	2.60432	17.5833	6.25596			17.0833	4.80626	19.0833	5.48548	16.6667	3.03028	17.8333	2.72117	20.75	3.82849	16.6667	6.99319
		16.8333	4.11088			16.75	5.59115	17.5	3.58727	16.75	10.029	19.25	11.5778	16.75	4.16573	16.75	3.50186					17.25	4.13391	17.25	5.23338	18.75	3.22713	18.4167	3.60206	16.75	11.2454	16.75	2.61029	17.6667	6.18822			17.1667	4.80068	19.1667	5.43805	16.75	3.03833	17.9167	2.72178	20.8333	3.88047	16.75	7.04287
		16.9167	3.96885			16.8333	5.64358	17.5833	3.60443	16.8333	10.0414	19.3333	11.638	16.8333	4.02846	16.8333	3.5189					17.3333	4.15284	17.3333	5.26758	18.8333	3.23498	18.5	3.60097	16.8333	11.3059	16.8333	2.61283	17.75	6.14554			17.25	4.86635	19.25	5.58936	16.8333	3.04188	18	2.70037	20.9167	3.94062	16.8333	7.06138
		17	3.89626			16.9167	5.55648	17.6667	3.61808	16.9167	10.047	19.4167	11.6865	16.9167	3.94596	16.9167	3.50162					17.4167	4.15102	17.4167	5.27734	18.9167	3.23406	18.5833	3.6017	16.9167	11.3963	16.9167	2.59329	17.8333	6.1313			17.3333	4.86697	19.3333	5.55373	16.9167	3.00665	18.0833	2.70566	21	3.96296	16.9167	7.19659
		17.0833	3.91925			17	5.53386	17.75	3.62479	17	10.0483	19.5	11.7181	17	3.91781	17	3.54515					17.5	4.12364	17.5	5.27385	19	3.20749	18.6667	3.6141	17	11.4582	17	2.60091	17.9167	6.03963			17.4167	4.89784	19.4167	5.60275	17	3.0378	18.1667	2.67913	21.0833	4.01148	17	7.20373
		17.1667	4.04072			17.0833	5.48349	17.8333	3.64618	17.0833	10.0709	19.5833	11.7652	17.0833	4.00996	17.0833	3.58839					17.5833	4.07526	17.5833	5.28538	19.0833	3.19644	18.75	3.60864	17.0833	11.5604	17.0833	2.60844	18	6.09074			17.5	4.87547	19.5	5.68381	17.0833	3.06331	18.25	2.70508	21.1667	4.00868	17.0833	7.16264
		17.25	4.1622			17.1667	5.58836	17.9167	3.67325	17.1667	10.1171	19.6667	11.8529	17.1667	4.04669	17.1667	3.64291					17.6667	4.04271	17.6667	5.29018	19.1667	3.18633	18.8333	3.62375	17.1667	11.6316	17.1667	2.60754	18.0833	5.99014			17.5833	4.85703	19.5833	5.66514	17.1667	3.10347	18.3333	2.67177	21.25	4.04309	17.1667	7.12857
		17.3333	4.23112			17.25	5.62197	18	3.68677	17.25	10.1803	19.75	11.9181	17.25	4.00541	17.25	3.65752					17.75	4.03574	17.75	5.30639	19.25	3.21212	18.9167	3.63002	17.25	11.7467	17.25	2.5679	18.1667	6.13177			17.6667	4.79649	19.6667	5.64301	17.25	3.14504	18.4167	2.70728	21.3333	4.08392	17.25	7.09833
		17.4167	4.12863			17.3333	5.6484	18.0833	3.66797	17.3333	10.2388	19.8333	11.9911	17.3333	4.11448	17.3333	3.65798					17.8333	4.03968	17.8333	5.26861	19.3333	3.21486	19	3.65916	17.3333	11.8033	17.3333	2.5172	18.25	6.22237			17.75	4.78049	19.75	5.52637	17.3333	3.11976	18.5	2.68435	21.4167	4.12147	17.3333	7.13388
		17.5	4.03402			17.4167	5.64017	18.1667	3.66893	17.4167	10.3201	19.9167	12.0522	17.4167	4.08332	17.4167	3.64681					17.9167	4.04226	17.9167	5.26761	19.4167	3.24345	19.0833	3.69436	17.4167	11.8614	17.4167	2.50568	18.3333	6.29549			17.8333	4.80694	19.8333	5.53682	17.4167	3.12401	18.5833	2.67794	21.5	4.17199	17.4167	7.06485
		17.5833	3.96383			17.5	5.71619	18.25	3.65246	17.5	10.3584	20	12.0877	17.5	4.13046	17.5	3.64206					18	4.04367	18	5.28104	19.5	3.27312	19.1667	3.71794	17.5	11.9542	17.5	2.50735	18.4167	6.30589			17.9167	4.82282	19.9167	5.64421	17.5	3.06614	18.6667	2.69282	21.5833	4.17958	17.5	7.08372
		17.6667	3.97416			17.5833	5.71189	18.3333	3.6508	17.5833	10.3875	20.0833	12.1585	17.5833	3.97968	17.5833	3.67702					18.0833	4.05888	18.0833	5.31948	19.5833	3.29312	19.25	3.71254	17.5833	12.018	17.5833	2.52531	18.5	6.34028			18	4.85014	20	5.7516	17.5833	3.10422	18.75	2.7073	21.6667	4.23581	17.5833	7.0851
		17.75	3.99702			17.6667	5.70039	18.4167	3.60293	17.6667	10.3232	20.1667	12.2339	17.6667	4.00354	17.6667	3.72823					18.1667	4.0333	18.1667	5.37786	19.6667	3.30756	19.3333	3.70601	17.6667	12.0879	17.6667	2.49864	18.5833	6.34803			18.0833	4.83519	20.0833	5.73413	17.6667	3.13235	18.8333	2.72598	21.75	4.27494	17.6667	7.15465
		17.8333	3.98181			17.75	5.71092	18.5	3.61016	17.75	10.2572	20.25	12.298	17.75	3.95097	17.75	3.79479					18.25	4.04305	18.25	5.38688	19.75	3.33046	19.4167	3.72317	17.75	12.1195	17.75	2.53029	18.6667	6.34821			18.1667	4.87739	20.1667	5.84864	17.75	3.20099	18.9167	2.70927	21.8333	4.2435	17.75	7.1125
		17.9167	4.08444			17.8333	5.74345	18.5833	3.63621	17.8333	10.1652	20.3333	12.3078	17.8333	3.96204	17.8333	3.81103					18.3333	4.04166	18.3333	5.38531	19.8333	3.32319	19.5	3.71581	17.8333	12.1766	17.8333	2.55734	18.75	6.37375			18.25	4.8272	20.25	6.00017	17.8333	3.19809	19	2.66263	21.9167	4.16883	17.8333	7.1194
		18	4.01679			17.9167	5.73578	18.6667	3.65363	17.9167	10.1651	20.4167	12.3274	17.9167	3.96809	17.9167	3.85106					18.4167	4.08441	18.4167	5.3709	19.9167	3.32651	19.5833	3.749	17.9167	12.2108	17.9167	2.60779	18.8333	6.39775			18.3333	4.81217	20.3333	6.1517	17.9167	3.18466	19.0833	2.63616	22	4.12427	17.9167	7.11137
		18.0833	4.1045			18	5.69086	18.75	3.67539	18	10.2023	20.5	12.351	18	4.02003	18	3.88728					18.5	4.05988	18.5	5.36266	20	3.29294	19.6667	3.74054	18	12.247	18	2.6144	18.9167	6.47637			18.4167	4.81893	20.4167	6.13515	18	3.16695	19.1667	2.57831	22.0833	4.11564	18	7.15749
		18.1667	4.17845			18.0833	5.73836	18.8333	3.65665	18.0833	10.2927	20.5833	12.373	18.0833	4.00188	18.0833	3.98263					18.5833	4.06435	18.5833	5.35738	20.0833	3.29018	19.75	3.75635	18.0833	12.2792	18.0833	2.60235	19	6.46148			18.5	4.85471	20.5	6.20423	18.0833	3.27953	19.25	2.60199	22.1667	4.09381	18.0833	7.18428
		18.25	4.25239			18.1667	5.68592	18.9167	3.66789	18.1667	10.3491	20.6667	12.3912	18.1667	4.04924	18.1667	3.98852					18.6667	4.04779	18.6667	5.35987	20.1667	3.31071	19.8333	3.73439	18.1667	12.2793	18.1667	2.59264	19.0833	6.48804			18.5833	4.8766	20.5833	6.2524	18.1667	3.28629	19.3333	2.62203	22.25	4.11882	18.1667	7.1707
						18.25	5.64084	19	3.6306	18.25	10.3869	20.75	12.4202	18.25	4.05655	18.25	3.97972					18.75	4.0637	18.75	5.3684	20.25	3.40952	19.9167	3.75502	18.25	12.2626	18.25	2.61629	19.1667	6.52847			18.6667	4.82002	20.6667	6.30057	18.25	3.33425	19.4167	2.64866	22.3333	4.16126	18.25	7.14558
						18.3333	5.62573	19.0833	3.61068	18.3333	10.3901	20.8333	12.5073	18.3333	4.11326	18.3333	3.97763					18.8333	4.06456	18.8333	5.40262	20.3333	3.40433	20	3.8146	18.3333	12.2594	18.3333	2.64737	19.25	6.58444			18.75	4.80498	20.75	6.18283	18.3333	3.37766	19.5	2.66888	22.4167	4.27435	18.3333	7.1267
						18.4167	5.72392	19.1667	3.60538	18.4167	10.4736	20.9167	12.5401	18.4167	4.11524	18.4167	4.02669					18.9167	4.06452	18.9167	5.41135	20.4167	3.39418	20.0833	3.82904	18.4167	12.2121	18.4167	2.649	19.3333	6.65213			18.8333	4.84629	20.8333	6.06509	18.4167	3.49233	19.5833	2.68497	22.5	4.32361	18.4167	7.1433
						18.5	5.81907	19.25	3.63939	18.5	10.4681	21	12.5415	18.5	4.15762	18.5	4.06357					19	4.09483	19	5.39203	20.5	3.27732	20.1667	3.81162	18.5	12.1695	18.5	2.65064	19.4167	6.654			18.9167	4.89027	20.9167	5.94735	18.5	3.55913	19.6667	2.71432	22.5833	4.37954	18.5	7.15075
						18.5833	5.92636	19.3333	3.66632	18.5833	10.5149	21.0833	12.4863	18.5833	4.18255	18.5833	4.13041					19.0833	4.10991	19.0833	5.34825	20.5833	3.30441	20.25	3.83904	18.5833	12.1502	18.5833	2.65227	19.5	6.66624			19	4.86655	21	5.82961	18.5833	3.56247	19.75	2.7658	22.6667	4.33217	18.5833	7.1153
						18.6667	5.90253	19.4167	3.66326	18.6667	10.4932	21.1667	12.5527	18.6667	4.18577	18.6667	4.21176					19.1667	4.12534	19.1667	5.29601	20.6667	3.29192	20.3333	3.95033	18.6667	12.2072	18.6667	2.6539	19.5833	6.65121			19.0833	4.86935	21.0833	5.69071	18.6667	3.56856	19.8333	2.74089	22.75	4.37803	18.6667	7.06653
						18.75	5.85295	19.5	3.63572	18.75	10.5629	21.25	12.6059	18.75	4.20195							19.25	4.1316	19.25	5.3021	20.75	3.32169	20.4167	3.97592	18.75	12.3129	18.75	2.65553	19.6667	6.69749			19.1667	4.86892	21.1667	5.55181	18.75	3.55963	19.9167	2.70461	22.8333	4.42262	18.75	7.03231
						18.8333	5.8368	19.5833	3.61588	18.8333	10.6189	21.3333	12.6961	18.8333	4.18447							19.3333	4.14772	19.3333	5.32071	20.8333	3.3118	20.5	3.94017	18.8333	12.3933	18.8333	2.65716	19.75	6.76418			19.25	4.87982	21.25	5.4129	18.8333	3.58017	20	2.65479	22.9167	4.47979	18.8333	7.06031
						18.9167	5.78923	19.6667	3.63021	18.9167	10.6417	21.4167	12.7934	18.9167	4.2026							19.4167	4.16693	19.4167	5.32488	20.9167	3.29056	20.5833	3.86841	18.9167	12.5239	18.9167	2.65048	19.8333	6.84047			19.3333	4.89363	21.3333	5.45417	18.9167	3.58841	20.0833	2.67799	23	4.54568	18.9167	7.03994
						19	5.82959	19.75	3.64444	19	10.6798	21.5	12.8761	19	4.16484							19.5	4.12589	19.5	5.3429	21	3.29955	20.6667	3.86778	19	12.5963	19	2.64381	19.9167	6.91617			19.4167	4.86543	21.4167	5.53051	19	3.54517	20.1667	2.71638	23.0833	4.6116	19	7.08378
						19.0833	5.77969	19.8333	3.67526			21.5833	12.8921	19.0833	4.16094							19.5833	4.11811	19.5833	5.34542	21.0833	3.32656	20.75	3.84785	19.0833	12.6709	19.0833	2.63713	20	6.906			19.5	4.86701	21.5	5.60685	19.0833	3.56894	20.25	2.78002	23.1667	4.70081	19.0833	7.09085
						19.1667	5.83876	19.9167	3.68965			21.6667	12.9377	19.1667	4.09919							19.6667	4.12182	19.6667	5.37034	21.1667	3.34315	20.8333	3.84236	19.1667	12.7307	19.1667	2.63045	20.0833	6.91484			19.5833	4.88469	21.5833	5.74978	19.1667	3.53318	20.3333	2.77041	23.25	4.73271	19.1667	7.13478
						19.25	5.86138	20	3.69054			21.75	13.0218	19.25	4.09327							19.75	4.14377	19.75	5.35999	21.25	3.31709	20.9167	3.7963	19.25	12.7881	19.25	2.62378	20.1667	6.91184			19.6667	4.9274	21.6667	5.89271	19.25	3.56603	20.4167	2.74438	23.3333	4.74804	19.25	7.13003
						19.3333	5.90363	20.0833	3.69044			21.8333	13.1036	19.3333	4.09521							19.8333	4.11721	19.8333	5.36669	21.3333	3.4529	21	3.80806	19.3333	12.8461	19.3333	2.60495	20.25	6.95927			19.75	4.96885	21.75	5.90637	19.3333	3.57744	20.5	2.7158	23.4167	4.77302	19.3333	7.13432
						19.4167	5.94846	20.1667	3.67756			21.9167	13.1176	19.4167	4.14946							19.9167	4.0826	19.9167	5.34858	21.4167	3.50593	21.0833	3.80669	19.4167	12.8943	19.4167	2.60109	20.3333	6.98377			19.8333	4.93956	21.8333	6.06391	19.4167	3.62247	20.5833	2.74156	23.5	4.84595	19.4167	7.12112
						19.5	5.94455	20.25	3.69892			22	13.1355	19.5	4.17735							20	4.10064	20	5.32768	21.5	3.55516	21.1667	3.83147	19.5	12.9329	19.5	2.60971	20.4167	7.04151			19.9167	4.90384	21.9167	6.22145	19.5	3.67927	20.6667	2.82941	23.5833	4.88542	19.5	7.12675
						19.5833	5.91092	20.3333	3.71282			22.0833	13.2163	19.5833	4.1546							20.0833	4.13365	20.0833	5.27533	21.5833	3.46544	21.25	3.87264	19.5833	13.0052	19.5833	2.61498	20.5	7.12178			20	4.88606	22	6.37899	19.5833	3.65256	20.75	2.80275	23.6667	4.78992	19.5833	7.05079
						19.6667	5.86414	20.4167	3.72544			22.1667	13.3209	19.6667	4.12632							20.1667	4.17296	20.1667	5.30506	21.6667	3.44131	21.3333	3.88471	19.6667	13.0829	19.6667	2.63833	20.5833	7.19353			20.0833	4.85735	22.0833	6.40633	19.6667	3.66765	20.8333	2.79224	23.75	4.72131	19.6667	6.99823
						19.75	5.83837	20.5	3.71446			22.25	13.3847	19.75	4.11404							20.25	4.16901	20.25	5.33615	21.75	3.46927	21.4167	3.85753	19.75	13.1356	19.75	2.64194	20.6667	7.22581			20.1667	4.85086	22.1667	6.26178	19.75	3.63118	20.9167	2.73137	23.8333	4.7983	19.75	6.99082
						19.8333	5.8334	20.5833	3.66618			22.3333	13.4277	19.8333	4.11778							20.3333	4.18857	20.3333	5.37042	21.8333	3.42441	21.5	3.89864	19.8333	13.1182	19.8333	2.64173	20.75	7.21184			20.25	4.8759	22.25	6.2841	19.8333	3.64901	21	2.76459	23.9167	4.87528	19.8333	7.04904
						19.9167	5.79264	20.6667	3.66023			22.4167	13.45	19.9167	4.11364							20.4167	4.18883	20.4167	5.35984	21.9167	3.45368	21.5833	3.8675	19.9167	13.0856	19.9167	2.62958	20.8333	7.25325			20.3333	4.88059	22.3333	6.36441	19.9167	3.63734	21.0833	2.79756	24	4.93828	19.9167	7.0726
						20	5.77209	20.75	3.66555			22.5	13.4951	20	4.08551							20.5	4.19559	20.5	5.36648	22	3.44554	21.6667	3.89969	20	13.0856	20	2.64788	20.9167	7.28632			20.4167	4.89114	22.4167	6.42214	20	3.65807	21.1667	2.79595	24.0833	5.05719	20	7.0589
						20.0833	5.86178	20.8333	3.72565			22.5833	13.546	20.0833	4.09167							20.5833	4.18849	20.5833	5.37019	22.0833	3.47499	21.75	3.83384	20.0833	13.1276	20.0833	2.66072	21	7.36358			20.5	4.88807	22.5	6.4572	20.0833	3.70883	21.25	2.76836	24.1667	4.98399	20.0833	7.06732
						20.1667	5.84242	20.9167	3.73262			22.6667	13.6149	20.1667	4.11134							20.6667	4.19087	20.6667	5.37907	22.1667	3.44182	21.8333	3.87348	20.1667	13.2011	20.1667	2.67198	21.0833	7.38807			20.5833	4.89377	22.5833	6.52678	20.1667	3.72865	21.3333	2.74293	24.25	5.11344	20.1667	7.09373
						20.25	5.89788	21	3.74004			22.75	13.7541	20.25	4.14767							20.75	4.23315	20.75	5.38477	22.25	3.46865	21.9167	3.87391	20.25	13.2732	20.25	2.68324	21.1667	7.42255			20.6667	4.90481	22.6667	6.67249	20.25	3.7256	21.4167	2.76689	24.3333	5.24289	20.25	7.15074
						20.3333	5.86278	21.0833	3.7108			22.8333	13.8934	20.3333	4.18335							20.8333	4.26153	20.8333	5.38428	22.3333	3.57452	22	3.84006	20.3333	13.4028			21.25	7.47209			20.75	4.89022	22.75	6.77897	20.3333	3.71595	21.5	2.78339	24.4167	5.28003	20.3333	7.15144
						20.4167	5.93611	21.1667	3.70595			22.9167	14.0149	20.4167	4.20073							20.9167	4.27723	20.9167	5.39824	22.4167	3.58244	22.0833	3.814	20.4167	13.5446			21.3333	7.5388			20.8333	4.85356	22.8333	6.8579	20.4167	3.7534	21.5833	2.81709	24.5	5.34498	20.4167	7.22934
						20.5	5.99005	21.25	3.67259			23	14.0735	20.5	4.21609							21	4.24907	21	5.38981	22.5	3.55226	22.1667	3.80562	20.5	13.5876			21.4167	7.61296			20.9167	4.82045	22.9167	6.90487	20.5	3.7617	21.6667	2.80765	24.5833	5.33444	20.5	7.26301
						20.5833	5.99783	21.3333	3.63735			23.0833	14.1048	20.5833	4.1875							21.0833	4.23097	21.0833	5.36968	22.5833	3.52612	22.25	3.79378	20.5833	13.661			21.5	7.63181			21	4.79438	23	6.95002	20.5833	3.74194	21.75	2.82858	24.6667	5.47488	20.5833	7.27212
						20.6667	6.0048	21.4167	3.62303			23.1667	14.1142	20.6667	4.19357							21.1667	4.23739	21.1667	5.36086	22.6667	3.56187	22.3333	3.8238	20.6667	13.6911			21.5833	7.66538			21.0833	4.81983	23.0833	6.97326	20.6667	3.69979	21.8333	2.7965	24.75	5.53047	20.6667	7.24327
						20.75	5.99118	21.5	3.63695			23.25	14.116	20.75	4.15186							21.25	4.21652	21.25	5.39094	22.75	3.52076	22.4167	3.80468	20.75	13.7529			21.6667	7.64662			21.1667	4.83043	23.1667	6.99874	20.75	3.74878	21.9167	2.82143	24.8333	5.50293	20.75	7.1847
						20.8333	6.01027	21.5833	3.64021			23.3333	14.1389	20.8333	4.13699							21.3333	4.22875	21.3333	5.39013	22.8333	3.50404	22.5	3.80905	20.8333	13.7323			21.75	7.70972			21.25	4.80223	23.25	7.03	20.8333	3.82626	22	2.81235	24.9167	5.40054	20.8333	7.17657
						20.9167	5.97392	21.6667	3.6126			23.4167	14.16	20.9167	4.14521							21.4167	4.21241	21.4167	5.37875	22.9167	3.49322	22.5833	3.77499	20.9167	13.7293			21.8333	7.69376			21.3333	4.80944	23.3333	7.04085	20.9167	3.85814	22.0833	2.7769	25	5.37033	20.9167	7.1818
						21	5.97381	21.75	3.63972			23.5	14.2992	21	4.19643							21.5	4.23529	21.5	5.33951	23	3.52546	22.6667	3.79691	21	13.8735			21.9167	7.8242			21.4167	4.7507	23.4167	7.03245	21	3.8704	22.1667	2.77807	25.0833	5.49108	21	7.21945
						21.0833	5.854	21.8333	3.67904			23.5833	14.4384	21.0833	4.23999							21.5833	4.19462	21.5833	5.36826	23.0833	3.5414	22.75	3.81595	21.0833	14.0176			22	7.87487			21.5	4.78387	23.5	6.98883	21.0833	3.84061	22.25	2.79547	25.1667	5.54153	21.0833	7.25357
						21.1667	5.80005	21.9167	3.72644			23.6667	14.5775	21.1667	4.2476							21.6667	4.19406	21.6667	5.3802	23.1667	3.5661	22.8333	3.84085	21.1667	14.1425			22.0833	7.95121			21.5833	4.79811	23.5833	6.92412	21.1667	3.83167	22.3333	2.83717	25.25	5.56717	21.1667	7.28641
						21.25	5.76757	22	3.75803			23.75	14.721	21.25	4.26482							21.75	4.20279	21.75	5.39551	23.25	3.5714	22.9167	3.85155	21.25	14.2029			22.1667	8.00258			21.6667	4.87896	23.6667	6.90096	21.25	3.78029	22.4167	2.83108	25.3333	5.51164	21.25	7.25077
						21.3333	5.75241	22.0833	3.7845			23.8333	14.8119	21.3333	4.27							21.8333	4.23423	21.8333	5.39573	23.3333	3.54546	23	3.88783	21.3333	14.2468			22.25	8.02921			21.75	4.95373	23.75	6.85114	21.3333	3.7609	22.5	2.81181	25.4167	5.51852	21.3333	7.26742
						21.4167	5.90417	22.1667	3.76451			23.9167	14.8702	21.4167	4.25896							21.9167	4.19372	21.9167	5.41365	23.4167	3.55168	23.0833	3.92134	21.4167	14.3246			22.3333	8.02936			21.8333	4.92614	23.8333	6.84061	21.4167	3.72708	22.5833	2.77489	25.5	5.58916	21.4167	7.24099
						21.5	5.81846	22.25	3.74815			24	15.0103	21.5	4.23651							22	4.21223	22	5.43582	23.5	3.55339	23.1667	3.94849	21.5	14.3826			22.4167	8.05153			21.9167	4.91107	23.9167	6.86796	21.5	3.78711	22.6667	2.77077	25.5833	5.55008	21.5	7.25506
						21.5833	5.77929	22.3333	3.74649			24.0833	15.1504	21.5833	4.25786							22.0833	4.24093	22.0833	5.45408	23.5833	3.57513	23.25	3.94623	21.5833	14.4376			22.5	8.04289			22	4.90135	24	6.9308	21.5833	3.80183	22.75	2.79298	25.6667	5.53437	21.5833	7.19078
						21.6667	5.69204	22.4167	3.77744			24.1667	15.2905	21.6667	4.30339							22.1667	4.3296	22.1667	5.49542	23.6667	3.562	23.3333	3.94568	21.6667	14.4428			22.5833	8.10458			22.0833	4.90729	24.0833	6.97133	21.6667	3.88279	22.8333	2.83466	25.75	5.40732	21.6667	7.17069
						21.75	5.73328	22.5	3.73461			24.25	15.3892	21.75	4.34754							22.25	4.32054	22.25	5.53205	23.75	3.53585	23.4167	3.95137	21.75	14.5027			22.6667	8.14828			22.1667	4.87158	24.1667	6.95586	21.75	3.8535	22.9167	2.86703	25.8333	5.3624	21.75	7.18706
						21.8333	5.78006	22.5833	3.70616					21.8333	4.33227							22.3333	4.33787	22.3333	5.57672	23.8333	3.51498	23.5	3.97218	21.8333	14.5327			22.75	8.20278			22.25	4.85174	24.25	6.94373	21.8333	3.85329	23	2.87511	25.9167	5.38647	21.8333	7.23491
						21.9167	5.80309	22.6667	3.71043					21.9167	4.2864							22.4167	4.35543	22.4167	5.62644	23.9167	3.52716	23.5833	3.99389	21.9167	14.607			22.8333	8.19046			22.3333	4.89718	24.3333	6.96736	21.9167	3.84748	23.0833	2.89605	26	5.4198	21.9167	7.24738
						22	5.86575	22.75	3.7546					22	4.2719							22.5	4.39817	22.5	5.63162	24	3.55707	23.6667	4.07897	22	14.5999			22.9167	8.15741			22.4167	4.97945	24.4167	6.99261	22	3.83273	23.1667	2.93379	26.0833	5.47732	22	7.21038
						22.0833	5.92335	22.8333	3.75384					22.0833	4.27643							22.5833	4.39158	22.5833	5.6969	24.0833	3.58022	23.75	4.14635	22.0833	14.5944			23	8.12539			22.5	4.99854	24.5	7.04218	22.0833	3.80864	23.25	2.97816	26.1667	5.44743	22.0833	7.18996
						22.1667	5.88303	22.9167	3.73757					22.1667	4.23265							22.6667	4.37942	22.6667	5.68591	24.1667	3.56216	23.8333	4.17373	22.1667	14.5842			23.0833	8.08899			22.5833	4.92324	24.5833	7.13264	22.1667	3.80605	23.3333	3.01133	26.25	5.45399	22.1667	7.19579
						22.25	5.88574	23	3.72938					22.25	4.18733							22.75	4.39046	22.75	5.69472	24.25	3.53787	23.9167	4.14164	22.25	14.6428			23.1667	8.08224			22.6667	4.90751	24.6667	7.22643	22.25	3.7902	23.4167	3.01739	26.3333	5.43049	22.25	7.20489
						22.3333	5.89825	23.0833	3.7368					22.3333	4.13811							22.8333	4.49106	22.8333	5.6593	24.3333	3.53794	24	4.04239	22.3333	14.7578			23.25	8.06725			22.75	4.90478	24.75	7.25703	22.3333	3.72842	23.5	3.04298	26.4167	5.45817	22.3333	7.2536
						22.4167	5.94753	23.1667	3.72608					22.4167	4.18201							22.9167	4.53912	22.9167	5.59193	24.4167	3.56257	24.0833	4.01812	22.4167	14.8475			23.3333	8.06421			22.8333	4.89632	24.8333	7.22507	22.4167	3.68531	23.5833	3.06304	26.5	5.50578	22.4167	7.27044
						22.5	5.95092	23.25	3.71113					22.5	4.21397							23	4.55883	23	5.52579	24.5	3.5764	24.1667	3.96684	22.5	14.9109			23.4167	8.03512			22.9167	4.87085	24.9167	7.21178	22.5	3.72078	23.6667	3.07757	26.5833	5.60257	22.5	7.27591
						22.5833	5.99295	23.3333	3.68752					22.5833	4.27461							23.0833	4.57534	23.0833	5.47467	24.5833	3.54585	24.25	3.96027	22.5833	14.8629			23.5	8.0549			23	4.84124	25	7.20302	22.5833	3.7916	23.75	3.04142	26.6667	5.66281	22.5833	7.23829
						22.6667	5.99094	23.4167	3.75123					22.6667	4.27647							23.1667	4.6463	23.1667	5.4364	24.6667	3.54755	24.3333	3.93166	22.6667	14.7326			23.5833	8.03627			23.0833	4.78752	25.0833	7.19453	22.6667	3.79388	23.8333	3.03059	26.75	5.74103	22.6667	7.25798
						22.75	5.9727	23.5	3.77837					22.75	4.28537							23.25	4.65049	23.25	5.43252	24.75	3.51163	24.4167	3.97377	22.75	14.6285			23.6667	8.0877			23.1667	4.78527	25.1667	7.21442	22.75	3.78503	23.9167	3.01132	26.8333	5.75594	22.75	7.25889
						22.8333	5.90435	23.5833	3.80351					22.8333	4.26592							23.3333	4.62218	23.3333	5.43417	24.8333	3.49486	24.5	4.05362	22.8333	14.5186			23.75	8.13964			23.25	4.80188	25.25	7.23116	22.8333	3.7246	24	3.02852	26.9167	5.79041	22.8333	7.31158
						22.9167	5.91954	23.6667	3.78873					22.9167	4.36195							23.4167	4.61621	23.4167	5.49483	24.9167	3.4733	24.5833	4.10128	22.9167	14.4495			23.8333	8.21983			23.3333	4.88365	25.3333	7.23847	22.9167	3.7043	24.0833	3.01891	27	5.75577	22.9167	7.28161
						23	5.91042	23.75	3.79562					23	4.41922							23.5	4.61165	23.5	5.51322	25	3.48511	24.6667	4.0643	23	14.368			23.9167	8.31266			23.4167	4.90323	25.4167	7.20228	23	3.74454	24.1667	3.13289	27.0833	5.74955	23	7.26352
						23.0833	5.94025	23.8333	3.84155					23.0833	4.52118							23.5833	4.69985	23.5833	5.52011	25.0833	3.5477	24.75	4.0034	23.0833	14.3633			24	8.31765			23.5	4.90816	25.5	7.19233	23.0833	3.78675	24.25	3.18356	27.1667	5.75289	23.0833	7.2586
						23.1667	5.90232	23.9167	3.8428					23.1667	4.48408							23.6667	4.82721	23.6667	5.4878	25.1667	3.57995	24.8333	3.9625	23.1667	14.3314			24.0833	8.25779			23.5833	4.88821	25.5833	7.20761	23.1667	3.82416	24.3333	3.20788	27.25	5.77292	23.1667	7.26242
						23.25	5.90786	24	3.83974					23.25	4.52678							23.75	4.94033	23.75	5.47884	25.25	3.58204	24.9167	3.96529	23.25	14.3029			24.1667	8.11765			23.6667	4.89688	25.6667	7.22766	23.25	3.79576	24.4167	3.16184	27.3333	5.74952	23.25	7.2694
						23.3333	5.91766	24.0833	3.80814					23.3333	4.54237							23.8333	5.01665	23.8333	5.46373	25.3333	3.57226	25	3.97879	23.3333	14.3114			24.25	8.06233			23.75	4.85712	25.75	7.22616	23.3333	3.79066	24.5	3.13093	27.4167	5.76588	23.3333	7.21768
						23.4167	6.05546	24.1667	3.75892					23.4167	4.5987							23.9167	5.09816	23.9167	5.48656	25.4167	3.56786	25.0833	3.95687	23.4167	14.3422			24.3333	8.05767			23.8333	4.88725	25.8333	7.241	23.4167	3.79401	24.5833	3.11024	27.5	5.712	23.4167	7.22137
						23.5	6.16981	24.25	3.80005					23.5	4.61316							24	5.15636	24	5.47926	25.5	3.56623	25.1667	3.95411	23.5	14.3864			24.4167	8.05767			23.9167	4.82824	25.9167	7.28646	23.5	3.80544	24.6667	3.12416	27.5833	5.77603	23.5	7.25038
						23.5833	6.21966	24.3333	3.82651					23.5833	4.60535							24.0833	5.15063	24.0833	5.51083	25.5833	3.56378	25.25	3.94819	23.5833	14.3637			24.5	8.03196			24	4.8216	26	7.34806	23.5833	3.79828	24.75	3.11339	27.6667	5.79993	23.5833	7.29356
						23.6667	6.11109	24.4167	3.88108					23.6667	4.65466							24.1667	5.13975	24.1667	5.53335	25.6667	3.56715	25.3333	3.97103	23.6667	14.3925			24.5833	8.04665			24.0833	4.75089	26.0833	7.36207	23.6667	3.76981	24.8333	3.10633	27.75	5.80469	23.6667	7.30558
						23.75	6.05967	24.5	3.85305					23.75	4.70225							24.25	5.16116	24.25	5.58359	25.75	3.55516	25.4167	3.99293	23.75	14.3681			24.6667	8.02346			24.1667	4.82679	26.1667	7.3419	23.75	3.78333	24.9167	3.09773	27.8333	5.80945	23.75	7.29044
						23.8333	6.04751	24.5833	3.84456					23.8333	4.72755							24.3333	5.18858	24.3333	5.56799	25.8333	3.53742	25.5	4.01641	23.8333	14.3836			24.75	8.03215			24.25	4.86079	26.25	7.29365	23.8333	3.85635	25	3.08951	27.9167	5.81421	23.8333	7.27354
						23.9167	6.07361	24.6667	3.85995					23.9167	4.70115							24.4167	5.19862	24.4167	5.5249	25.9167	3.53363	25.5833	3.9767	23.9167	14.3921			24.8333	8.06934			24.3333	4.90777	26.3333	7.23552	23.9167	3.97063	25.0833	3.13478	28	5.81896	23.9167	7.26141
						24	6.06153	24.75	3.89042					24	4.72867							24.5	5.18953	24.5	5.4814	26	3.54803	25.6667	3.98666	24	14.4001			24.9167	8.14006			24.4167	4.82834	26.4167	7.2157	24	3.94265	25.1667	3.15353	28.0833	5.82372	24	7.31259
						24.0833	6.13357	24.8333	3.91221					24.0833	4.72026							24.5833	5.20325	24.5833	5.43813	26.0833	3.55554	25.75	4.01024	24.0833	14.4606			25	8.23651			24.5	4.83522	26.5	7.1835	24.0833	3.96054	25.25	3.17038	28.1667	5.82633	24.0833	7.34133
						24.1667	6.1642	24.9167	3.90098					24.1667	4.77174							24.6667	5.20886	24.6667	5.4848	26.1667	3.50504	25.8333	4.11847	24.1667	14.4688			25.0833	8.28139			24.5833	4.8303	26.5833	7.17639	24.1667	3.95515	25.3333	3.17329	28.25	5.7805	24.1667	7.32552
						24.25	6.13439	25	3.88609					24.25	4.7859							24.75	5.24589	24.75	5.46643	26.25	3.49945	25.9167	4.11856	24.25	14.4388			25.1667	8.35617			24.6667	4.88857	26.6667	7.12285	24.25	4.0349	25.4167	3.15843	28.3333	5.79427	24.25	7.2479
						24.3333	6.01508	25.0833	3.87524					24.3333	4.823							24.8333	5.29498	24.8333	5.50767	26.3333	3.54818	26	4.14111	24.3333	14.3804			25.25	8.45896			24.75	4.88718	26.75	7.06959	24.3333	4.00085	25.5	3.21669	28.4167	5.7885	24.3333	7.1933
						24.4167	5.99763	25.1667	3.94227					24.4167	4.82261							24.9167	5.33095	24.9167	5.48356	26.4167	3.56841	26.0833	4.12461	24.4167	14.3307			25.3333	8.54747			24.8333	4.89201	26.8333	7.01573	24.4167	3.95675	25.5833	3.21264	28.5	5.83536	24.4167	7.23021
						24.5	6.0088	25.25	3.92804					24.5	4.81346							25	5.34504	25	5.50182	26.5	3.57885	26.1667	4.14422	24.5	14.3525			25.4167	8.63546			24.9167	4.84968	26.9167	7.02243	24.5	3.9887	25.6667	3.1975			24.5	7.25543
						24.5833	5.9949	25.3333	3.94907					24.5833	4.84374							25.0833	5.32945	25.0833	5.51047	26.5833	3.54714	26.25	4.151	24.5833	14.3772			25.5	8.66412			25	4.79134	27	7.01851	24.5833	4.02842	25.75	3.12541			24.5833	7.26686
						24.6667	5.9818	25.4167	3.90932					24.6667	4.86165							25.1667	5.33303	25.1667	5.48922	26.6667	3.58089	26.3333	4.17654	24.6667	14.3798			25.5833	8.71897			25.0833	4.75592	27.0833	7.02485	24.6667	4.07809	25.8333	3.1051			24.6667	7.22542
						24.75	5.98005	25.5	3.96381					24.75	4.84861							25.25	5.35771	25.25	5.52881	26.75	3.60969	26.4167	4.19818	24.75	14.461			25.6667	8.67704			25.1667	4.7963	27.1667	7.03309	24.75	4.0461	25.9167	3.08545			24.75	7.22132
						24.8333	5.95985	25.5833	3.92302					24.8333	4.85487							25.3333	5.36251	25.3333	5.5223	26.8333	3.60606	26.5	4.2015	24.8333	14.4867			25.75	8.73191			25.25	4.86533	27.25	7.05468	24.8333	3.99726	26	3.05723			24.8333	7.23193
						24.9167	5.93034	25.6667	3.8884					24.9167	4.82039							25.4167	5.36896	25.4167	5.5478	26.9167	3.60308	26.5833	4.16168	24.9167	14.4172			25.8333	8.71654			25.3333	4.90789	27.3333	7.07632	24.9167	3.97709	26.0833	3.05512			24.9167	7.2408
						25	5.95034	25.75	3.85683					25	4.83503							25.5	5.3895	25.5	5.53925	27	3.57516	26.6667	4.10973	25	14.3288			25.9167	8.70293			25.4167	4.90222	27.4167	7.13831	25	3.99566	26.1667	3.04965			25	7.23162
						25.0833	5.94742	25.8333	3.8971					25.0833	4.86299							25.5833	5.43004	25.5833	5.55749	27.0833	3.60536	26.75	4.06192	25.0833	14.3837			26	8.62895			25.5	4.89752	27.5	7.15013	25.0833	4.01149	26.25	3.02729			25.0833	7.21813
						25.1667	5.96645	25.9167	3.93775					25.1667	4.94133							25.6667	5.49642	25.6667	5.55992	27.1667	3.60047	26.8333	4.0202	25.1667	14.4039			26.0833	8.61494			25.5833	4.8587	27.5833	7.16224	25.1667	4.05016	26.3333	3.04185			25.1667	7.22429
						25.25	5.93429	26	3.88098					25.25	4.99186							25.75	5.47286	25.75	5.5448	27.25	3.60194	26.9167	3.99055	25.25	14.421			26.1667	8.65717			25.6667	4.85005	27.6667	7.13357	25.25	4.05239	26.4167	3.05757			25.25	7.21506
						25.3333	5.92147	26.0833	3.81321					25.3333	5.03562							25.8333	5.4319	25.8333	5.53354	27.3333	3.56049	27	3.97994	25.3333	14.3492			26.25	8.63787			25.75	4.8248	27.75	7.19588	25.3333	4.08601	26.5	3.09347			25.3333	7.24836
						25.4167	5.92999	26.1667	3.75138					25.4167	5.0776							25.9167	5.38572	25.9167	5.53637	27.4167	3.5301	27.0833	4.00667	25.4167	14.4491			26.3333	8.65951			25.8333	4.85307	27.8333	7.26645	25.4167	4.03164	26.5833	3.10637			25.4167	7.25812
						25.5	5.95036	26.25	3.73504					25.5	5.12111							26	5.40286	26	5.54713	27.5	3.51612	27.1667	4.01713	25.5	14.4369			26.4167	8.61002			25.9167	4.85257	27.9167	7.31589	25.5	4.01552	26.6667	3.10174			25.5	7.24998
						25.5833	5.98593	26.3333	3.73898					25.5833	5.13645							26.0833	5.42769	26.0833	5.5207	27.5833	3.50022	27.25	4.04829	25.5833	14.5637			26.5	8.6225			26	4.86306	28	7.3952	25.5833	4.0112	26.75	3.08752			25.5833	7.2064
						25.6667	5.98699	26.4167	3.73373					25.6667	5.16844							26.1667	5.45175	26.1667	5.47676	27.6667	3.50977	27.3333	4.05818	25.6667	14.5797			26.5833	8.62287			26.0833	4.84877	28.0833	7.48477	25.6667	4.03419	26.8333	3.05955			25.6667	7.25068
						25.75	6.00292	26.5	3.76006					25.75	5.13757							26.25	5.45894	26.25	5.43787	27.75	3.484	27.4167	4.0837	25.75	14.5352			26.6667	8.62664			26.1667	4.83558	28.1667	7.52735	25.75	4.0513	26.9167	3.05374			25.75	7.23711
						25.8333	6.03824	26.5833	3.73642					25.8333	5.19753							26.3333	5.49066	26.3333	5.44383	27.8333	3.50649	27.5	4.0885	25.8333	14.3835			26.75	8.65382			26.25	4.83043	28.25	7.53304	25.8333	4.03448	27	3.07938			25.8333	7.2392
						25.9167	6.0354	26.6667	3.74761					25.9167	5.20293							26.4167	5.52681	26.4167	5.47481	27.9167	3.52326	27.5833	4.00736	25.9167	14.3011			26.8333	8.69328			26.3333	4.83546	28.3333	7.48909	25.9167	3.98822	27.0833	3.13823			25.9167	7.15006
						26	6.02457	26.75	3.75084					26	5.25216							26.5	5.56125	26.5	5.49432	28	3.57011	27.6667	4.01034	26	14.3445			26.9167	8.78325			26.4167	4.82054	28.4167	7.51664	26	4.01541	27.1667	3.13989			26	7.09161
						26.0833	5.96761	26.8333	3.75507					26.0833	5.21433							26.5833	5.58217	26.5833	5.4935	28.0833	3.5369	27.75	3.98749	26.0833	14.4239			27	8.80911			26.5	4.8124	28.5	7.54929	26.0833	3.99568	27.25	3.19234			26.0833	7.0263
						26.1667	5.96326	26.9167	3.74157					26.1667	5.21986							26.6667	5.57621	26.6667	5.48139	28.1667	3.51485	27.8333	4.0886	26.1667	14.4673			27.0833	8.80469			26.5833	4.78756	28.5833	7.62747	26.1667	4.05456	27.3333	3.18708			26.1667	6.99316
						26.25	5.91847	27	3.76762					26.25	5.25544							26.75	5.59821	26.75	5.4902	28.25	3.53485	27.9167	4.11063	26.25	14.434			27.1667	8.78033			26.6667	4.79391	28.6667	7.64614	26.25	4.02089	27.4167	3.24943			26.25	7.014
						26.3333	5.93416	27.0833	3.78199					26.3333	5.35111							26.8333	5.63936	26.8333	5.49958	28.3333	3.57557	28	4.11674	26.3333	14.4614			27.25	8.81957			26.75	4.792	28.75	7.66345	26.3333	4.03129	27.5	3.24993			26.3333	7.00948
						26.4167	5.95683	27.1667	3.77641					26.4167	5.34184							26.9167	5.65962	26.9167	5.51575	28.4167	3.61627	28.0833	4.10563	26.4167	14.4418			27.3333	8.87897			26.8333	4.81823	28.8333	7.70772	26.4167	4.0059	27.5833	3.25477			26.4167	7.04236
						26.5	5.99605	27.25	3.76104					26.5	5.24374							27	5.70907	27	5.50993	28.5	3.61551	28.1667	4.06813	26.5	14.4982			27.4167	8.94031			26.9167	4.78392	28.9167	7.75072	26.5	3.99531	27.6667	3.24944			26.5	7.00636
						26.5833	6.04586	27.3333	3.75495					26.5833	5.21123							27.0833	5.69533	27.0833	5.50979	28.5833	3.62409	28.25	4.09536	26.5833	14.4622			27.5	8.93439			27	4.78226	29	7.79184	26.5833	3.98577	27.75	3.24989			26.5833	7.02626
						26.6667	6.06694	27.4167	3.79751					26.6667	5.22284							27.1667	5.71883	27.1667	5.52742	28.6667	3.62302	28.3333	4.10004	26.6667	14.5386			27.5833	8.97151			27.0833	4.76805	29.0833	7.81299	26.6667	3.9749	27.8333	3.25636			26.6667	7.00108
						26.75	6.00879	27.5	3.82432					26.75	5.24009							27.25	5.67027	27.25	5.5407	28.75	3.65165	28.4167	4.12404	26.75	14.5759			27.6667	8.9069			27.1667	4.81436	29.1667	7.8102	26.75	3.99527	27.9167	3.26443			26.75	6.9697
						26.8333	5.9619	27.5833	3.79877					26.8333	5.2723							27.3333	5.62651	27.3333	5.51291	28.8333	3.65329	28.5	4.10823	26.8333	14.4532			27.75	8.95886			27.25	4.80808	29.25	7.84086	26.8333	4.01623	28	3.27026			26.8333	7.02004
						26.9167	5.94901	27.6667	3.7393					26.9167	5.20685							27.4167	5.55406	27.4167	5.49645	28.9167	3.65514	28.5833	4.0766	26.9167	14.3627			27.8333	9.01615			27.3333	4.78403	29.3333	7.82795	26.9167	4.01963	28.0833	3.29657			26.9167	7.02097
						27	5.976	27.75	3.73436					27	5.21721							27.5	5.50292	27.5	5.50285	29	3.60459	28.6667	4.0263	27	14.2883			27.9167	9.14708			27.4167	4.79949	29.4167	7.84459	27	3.99844	28.1667	3.28045			27	7.07881
						27.0833	5.99908	27.8333	3.74771					27.0833	5.20796							27.5833	5.45763	27.5833	5.52541	29.0833	3.56761	28.75	3.96766	27.0833	14.2972			28	9.19945			27.5	4.76758	29.5	7.82392	27.0833	3.99516	28.25	3.28271			27.0833	7.05257
						27.1667	5.97838	27.9167	3.76489					27.1667	5.24835							27.6667	5.44412	27.6667	5.55038	29.1667	3.56521	28.8333	3.99222	27.1667	14.3287			28.0833	9.21881			27.5833	4.78093	29.5833	7.79744	27.1667	3.99717	28.3333	3.26991			27.1667	7.07739
						27.25	5.98556	28	3.79061					27.25	5.20702							27.75	5.42722	27.75	5.51014	29.25	3.60895	28.9167	4.03117	27.25	14.4451			28.1667	9.22144			27.6667	4.7721	29.6667	7.78215	27.25	4.01271	28.4167	3.2565			27.25	7.11752
						27.3333	5.98146	28.0833	3.84266					27.3333	5.22328							27.8333	5.41805	27.8333	5.53278	29.3333	3.59025	29	4.04799	27.3333	14.5036			28.25	9.25138			27.75	4.83844	29.75	7.82078	27.3333	3.98378	28.5	3.19883			27.3333	7.14832
						27.4167	6.05178	28.1667	3.93555					27.4167	5.29697							27.9167	5.40649	27.9167	5.53278	29.4167	3.5737	29.0833	4.03974	27.4167	14.607			28.3333	9.32268			27.8333	4.82322	29.8333	7.89492	27.4167	3.95572	28.5833	3.09691			27.4167	7.14421
						27.5	6.07216	28.25	3.99442					27.5	5.35566							28	5.43759	28	5.58601	29.5	3.53633	29.1667	4.04802	27.5	14.5139			28.4167	9.3437			27.9167	4.80884	29.9167	7.95656	27.5	3.94206	28.6667	3.07435			27.5	7.13095
						27.5833	6.05235	28.3333	4.03326					27.5833	5.34841							28.0833	5.50029	28.0833	5.59098	29.5833	3.56497	29.25	4.12519	27.5833	14.6487			28.5	9.34426			28	4.80701			27.5833	3.94072	28.75	3.0901			27.5833	7.10644
						27.6667	5.94751	28.4167	3.96952					27.6667	5.31535							28.1667	5.51921	28.1667	5.56637	29.6667	3.56065	29.3333	4.18409	27.6667	14.7836			28.5833	9.29716			28.0833	4.83532			27.6667	3.96946	28.8333	3.09334			27.6667	7.14208
						27.75	5.95831	28.5	3.95179					27.75	5.34802							28.25	5.51581	28.25	5.57555	29.75	3.59088	29.4167	4.19526	27.75	14.9184			28.6667	9.25532			28.1667	4.85723			27.75	4.01672	28.9167	3.0992			27.75	7.10697
						27.8333	5.97088	28.5833	3.93148					27.8333	5.4299							28.3333	5.50525	28.3333	5.54425	29.8333	3.60932	29.5	4.17031	27.8333	15.0501			28.75	9.24059			28.25	4.83571			27.8333	4.01749	29	3.07924			27.8333	7.07725
						27.9167	6.04711	28.6667	3.9582					27.9167	5.47275							28.4167	5.52587	28.4167	5.56463	29.9167	3.66474	29.5833	4.16327	27.9167	15.181			28.8333	9.1907			28.3333	4.82223			27.9167	4.02233	29.0833	3.10398			27.9167	7.02777
						28	6.03014	28.75	3.89894					28	5.5099							28.5	5.54586	28.5	5.53399	30	3.68466	29.6667	4.17812	28	15.3299			28.9167	9.1508			28.4167	4.81891			28	4.00755	29.1667	3.08638			28	7.04518
						28.0833	6.0236	28.8333	3.85062					28.0833	5.46884							28.5833	5.54635	28.5833	5.53142			29.75	4.18328	28.0833	15.4135			29	9.13119			28.5	4.81694			28.0833	4.03887	29.25	3.08656			28.0833	7.09455
						28.1667	6.00793	28.9167	3.86021					28.1667	5.48159							28.6667	5.54778	28.6667	5.50489			29.8333	4.16318	28.1667	15.4274			29.0833	9.14088			28.5833	4.84851			28.1667	4.09922	29.3333	3.12459			28.1667	7.05146
						28.25	5.96359	29	3.91508					28.25	5.46994							28.75	5.5362	28.75	5.50995			29.9167	4.14073	28.25	15.4255			29.1667	9.20524			28.6667	4.83851			28.25	4.09882	29.4167	3.16544			28.25	7.04456
						28.3333	6.00719	29.0833	3.92125					28.3333	5.5465							28.8333	5.54913	28.8333	5.513					28.3333	15.417			29.25	9.19499			28.75	4.81718			28.3333	4.10318	29.5	3.17716			28.3333	6.99656
						28.4167	6.03251	29.1667	3.86087					28.4167	5.59204							28.9167	5.58535	28.9167	5.51502					28.4167	15.2759			29.3333	9.22879			28.8333	4.77776			28.4167	4.08721	29.5833	3.17295			28.4167	6.99014
						28.5	6.11556	29.25	3.88463					28.5	5.55015							29	5.62495	29	5.50628					28.5	15.1348			29.4167	9.18939			28.9167	4.77042			28.5	4.08414	29.6667	3.18258			28.5	7.00775
						28.5833	6.06968	29.3333	4.01798					28.5833	5.52216							29.0833	5.61053	29.0833	5.52562					28.5833	14.9937			29.5	9.20554			29	4.77994			28.5833	4.08468	29.75	3.19239			28.5833	7.01382
						28.6667	6.02929	29.4167	4.15133					28.6667	5.48904							29.1667	5.5857	29.1667	5.53644					28.6667	14.8526			29.5833	9.16836			29.0833	4.84277			28.6667	4.05751	29.8333	3.18071			28.6667	7.05777
						28.75	5.94515	29.5	4.11918					28.75	5.55811							29.25	5.59	29.25	5.55641					28.75	14.7115			29.6667	9.16049			29.1667	4.83455			28.75	4.06005	29.9167	3.21012			28.75	7.01961
						28.8333	5.93223	29.5833	4.0809					28.8333	5.55766							29.3333	5.66049	29.3333	5.56335					28.8333	14.5704			29.75	9.15583			29.25	4.88136			28.8333	4.00456					28.8333	7.00369
						28.9167	5.85682	29.6667	3.97342					28.9167	5.5963							29.4167	5.65257	29.4167	5.5671					28.9167	14.5459			29.8333	9.17652			29.3333	4.91678			28.9167	4.02697					28.9167	7.02631
						29	5.99026	29.75	4.04042					29	5.57482							29.5	5.59993	29.5	5.57833					29	14.5214			29.9167	9.19797			29.4167	4.97716			29	4.0155					29	7.0541
						29.0833	6.12371	29.8333	4.06847					29.0833	5.58914							29.5833	5.56822	29.5833	5.59492					29.0833	14.497							29.5	4.9272			29.0833	4.04097					29.0833	7.07425
						29.1667	6.25716	29.9167	4.02193					29.1667	5.5538							29.6667	5.56541	29.6667	5.6442					29.1667	14.4725							29.5833	4.88734			29.1667	3.99143					29.1667	7.00906
						29.25	6.39061							29.25	5.54279							29.75	5.58077	29.75	5.60585					29.25	14.3716							29.6667	4.87595			29.25	3.99776					29.25	7.04882
														29.3333	5.54179							29.8333	5.55697	29.8333	5.59379					29.3333	14.5289							29.75	4.87992			29.3333	3.89191					29.3333	7.07426
														29.4167	5.56923							29.9167	5.55718	29.9167	5.60703					29.4167	14.6861							29.8333	4.84641			29.4167	3.85212					29.4167	7.11093
														29.5	5.53826									30	5.66282					29.5	14.8434							29.9167	4.82869			29.5	3.77416					29.5	7.10578
														29.5833	5.5525															29.5833	15.0007											29.5833	3.78915					29.5833	7.1118
														29.6667	5.60123															29.6667	15.1579											29.6667	3.81007					29.6667	7.10068
														29.75	5.63083															29.75	15.1985											29.75	3.74305					29.75	7.08543
														29.8333	5.66701															29.8333	15.2551											29.8333	3.67172					29.8333	7.05917
														29.9167	5.66907															29.9167	15.2572											29.9167	3.63384
																														30	15.3196
[truncated: 4 more columns]

## Sheet: 2S1C
time (min)	3	5	7	9	11	13	15	17	19	21	23	25	27	29
velocity (nm/s)	0.502287	0.961318	0.133152	0.407617	-0.08411	0.3979	-0.450026	-1.35831	0.2091	-1.17931	-1.15773	-0.790518	-0.995271	-1.90129
	0.953079	1.26036	-0.181717	-0.755338	-0.53018	-0.65221	-0.024686	-1.06615	0.005146	-1.56353	-0.582209	-0.785086	-0.222782	0.379353
	2.3264	2.8981	0.201237	0.344459	-0.221276	0.364124	1.02821	0.656064	-0.275925	-1.09055	0.612248	0.24983	-0.255904	0.663989
	2.93438	4.08204	1.59224	0.592411	0.486166	0.558178	0.565569	0.499998	-0.92104	0.734808	0.421399	0.088783	-0.497413
	4.61693	3.27656	1.25703	1.98377	1.95458	1.84504	0.371118	-0.550326	-0.471637	0.6484	0.259154	-0.1262	-0.285403
	3.70214	4.00809	1.51719	1.70706	1.31261	1.32903	0.448267	0.288088	-0.032648	-0.020895	0.532812	0.043409	-0.243021
	4.05006	4.42211	2.39417	1.02788	1.6208	0.815174	0.897451	0.626554	0.129313	-0.254396	1.03949	0.178465	-0.204557
	5.00658	4.94286	3.78776	1.14421	1.99437	1.51893	1.14064	0.670779	0.232856	-0.095555	1.83321	0.284303	0.468601
	5.2148	5.42607	2.8368	1.91436	2.60047	2.00231	2.54155	1.61552	1.56199	0.356977	1.51998	0.662652	0.183167
	8.27731	6.9146	2.64718	2.4607	2.56506	4.14853	1.71946	1.05839	1.19973	0.695064	2.88906	0.390488	0.676937
	8.02941	7.13226	2.75888	4.07667	2.34253	3.72098	1.70921	0.884607	0.811231	1.1357	3.20415	0.971151	0.968475
	7.19687	8.09591	3.14285	3.49541	2.55736	2.92863	2.1593	1.29135	0.715912	1.47211	5.43201	2.75394	1.58796
	7.71559	7.68229	4.16775	2.79423	2.58858	3.08854	2.55887	1.88032	0.832255	1.66498	5.9316	2.8824	2.33991
	8.19222	8.99906	5.75671	3.04417	3.18417	4.14226	3.02913	3.59862	1.28498	5.79649	6.86701	3.01975	3.4323
	8.33452	10.1934	5.0225	3.91033	3.95075	4.29382	2.92677	4.45128	1.6175	8.33059	7.545	4.45416	4.64719
	9.71952	9.92518	4.48008	4.08248	5.81652	5.84052	2.91258	3.89137	2.77348	8.36713	14.7308	7.08611	5.47195
	10.6745	9.25795	4.92303	5.93103	5.02363	4.5479	2.9567	4.19434	6.65062	13.163
	10.2024	9.58976	5.10324	5.26574	5.01201	5.70223	3.79092	4.70577	9.71789
	10.4762	9.95313	5.85978	4.74243	5.2757	5.95929	5.3436	7.12403	13.2834
	11.8888	10.4925	8.98826	5.32493	6.22372	7.19239	5.46259	8.45814
	13.3834	11.3915	10.5517	6.14069	7.01693	8.30961	9.04204	11.0462
	15.0049	10.5555	11.3778	6.54465	7.27171	8.59107	9.96566
	16.078	10.714	12.205	7.05903	10.675	9.93511	11.0792
		11.6039	12.6513	11.1856	13.7723	16.5218
		12.5347	13.4281	13.0499	13.2245
		14.0829	15.2573	16.617	13.9459
			16.2015
median velocity (nm/s)	8.02941	8.54749	4.48008	3.70287	2.89232	3.93162	2.54155	1.29135	0.811231	0.695064	1.6766	0.337395	0.325884	0.379353
