# Supplementary material for: SSNA1 stabilizes dynamic microtubules and detects microtubule damage
Source: eLife journal article supplement (doi:10.7554/elife.67282), 2021-12-31
Supplement: supp [file elife-67282-supp-v1.zip › elife_poa_e67282_Figure_3_source_data_1.xlsx]

## Sheet: Fig3C
GMPCPP-stabilized seed		Pre-existing 'old' GDP lattice			GMPCPP-stabilized seed			Pre-existing 'old' GDP lattice
F.I. (a.u.)	SD	F.I. (a.u.)	SD		Mean F.I. (a.u.)	SD	SE	Mean F.I. (a.u.)	SD	SE
9322.7	405.176	8189.96	434.707		9795.92	739.405	179.332	9610.22	729.847	133.251
6115.05	326.578	10593.8	412.532
9669.77	340.832	6377.64	270.757
7676	263.442	7833.98	1258.63
9667.42	1071.38	9609.18	219.896
9492.41	583.801	6753.25	408.946
11611.5	1194.06	8758.5	398.036
8186.95	1041.81	9179.12	1130.86
11924.4	984.185	8747.52	339.21
5929.05	329.604	8149.19	498.376
10905	634.493	11386.3	516.802
11307.8	579.817	11273.9	497.15
11387.5	656.613	8311.41	557.671
13148.4	1671.23	9489.89	1214.33
10819.1	1268.27	11421.6	935.287
11235.4	525.552	11350.9	1135.03
8132.13	693.046	6216.1	271.405
		11906.1	1891.19
		9849.69	802.074
		11957.8	479.764
		11977.8	971.415
		11224.6	283.841
		10053.8	409.954
		9883.5	938.905
		10819.1	1268.27
		8386.43	514.046
		9855.37	1721.26
		10846.5	1156.64
		10236.4	475.99
		7667.28	482.442

## Sheet: Fig3D
Distance (µm)	Normalized seed F.I. (a.u.)	Normalized SSNA1 F.I. (a.u.)	Normalized Tubulin F.I. (a.u.)
0	0.03	0.71	0.72
0.16	0.03	0.7	0.7
0.32	0.04	0.72	0.66
0.48	0.04	0.76	0.61
0.64	0.04	0.78	0.56
0.8	0.05	0.79	0.55
0.96	0.05	0.81	0.6
1.12	0.05	0.83	0.7
1.28	0.04	0.83	0.82
1.44	0.04	0.82	0.89
1.6	0.03	0.8	0.89
1.76	0.02	0.78	0.83
1.92	0.02	0.78	0.77
2.08	0.03	0.79	0.73
2.24	0.04	0.83	0.74
2.4	0.05	0.89	0.77
2.56	0.04	0.94	0.8
2.72	0.04	0.97	0.85
2.88	0.05	0.99	0.88
3.04	0.07	0.99	0.9
3.2	0.07	0.94	0.89
3.36	0.07	0.83	0.85
3.52	0.06	0.69	0.8
3.68	0.07	0.56	0.77
3.84	0.08	0.48	0.72
4	0.09	0.44	0.68
4.16	0.1	0.43	0.68
4.32	0.11	0.42	0.71
4.48	0.12	0.4	0.73
4.64	0.14	0.38	0.72
4.8	0.14	0.35	0.7
4.96	0.14	0.32	0.68
5.12	0.14	0.3	0.66
5.28	0.16	0.3	0.64
5.44	0.18	0.31	0.62
5.6	0.19	0.3	0.58
5.76	0.2	0.28	0.56
5.92	0.2	0.26	0.56
6.08	0.22	0.25	0.55
6.24	0.29	0.26	0.53
6.4	0.41	0.28	0.49
6.56	0.54	0.29	0.42
6.72	0.64	0.27	0.31
6.88	0.71	0.21	0.21
7.04	0.8	0.16	0.15
7.2	0.89	0.14	0.13
7.36	0.98	0.16	0.11
7.52	0.99	0.18	0.11
7.68	0.97	0.16	0.1
7.84	0.92	0.17	0.08
8	0.87	0.2	0.07
8.16	0.85	0.21	0.07
8.32	0.92	0.21	0.07
8.48	1	0.21	0.07
8.64	0.99	0.22	0.06
8.8	0.93	0.23	0.06
8.96	0.9	0.24	0.05
9.12	0.94	0.26	0.06
9.28	0.97	0.27	0.07
9.44	0.95	0.29	0.1
9.6	0.89	0.29	0.13
9.76	0.83	0.3	0.14
9.92	0.78	0.32	0.15
10.08	0.68	0.31	0.2
10.24	0.55	0.29	0.28
10.4	0.42	0.28	0.38
10.56	0.33	0.32	0.5
10.72	0.25	0.38	0.66
10.88	0.18	0.43	0.83
11.04	0.16	0.44	0.97
11.2	0.18	0.42	1
11.36	0.18	0.37	0.92
11.52	0.17	0.32	0.78
11.68	0.14	0.3	0.64
11.84	0.11	0.29	0.54
12	0.08	0.27	0.51
12.16	0.06	0.23	0.51
12.32	0.06	0.19	0.53
12.48	0.06	0.17	0.54
12.64	0.05	0.18	0.53
12.8	0.05	0.21	0.54
12.96	0.05	0.21	0.56
13.12	0.04	0.19	0.58
13.28	0.03	0.19	0.59
13.44	0.02	0.22	0.59
13.6	0.04	0.26	0.57
13.76	0.05	0.28	0.56
13.92	0.05	0.28	0.59
14.08	0.04	0.28	0.65
14.24	0.04	0.28	0.71
14.4	0.05	0.29	0.72
14.56	0.06	0.29	0.69
14.72	0.05	0.29	0.65
14.88	0.03	0.3	0.64
15.04	0.03	0.34	0.65
15.2	0.02	0.38	0.68
15.36	0.02	0.42	0.7
15.52	0.02	0.45	0.72
15.68	0.01	0.45	0.72
15.84	0.01	0.43	0.72
16	0.01	0.45	0.71
16.16	0.02	0.53	0.68
16.32	0.02	0.67	0.65
16.48	0.02	0.81	0.64
16.64	0.03	0.91	0.64
16.8	0.03	0.96	0.66
16.96	0.01	0.98	0.72
17.12	0	0.99	0.78
17.28	0.01	0.98	0.82
17.44	0.01	0.96	0.81
17.6	0.02	0.93	0.76
17.76	0.02	0.92	0.7
17.92	0.03	0.96	0.67
18.08	0.06	1	0.69
18.24	0.07	0.96	0.72
18.4	0.05	0.84	0.73
18.56	0.03	0.65	0.7
18.72	0.02	0.46	0.59
18.88	0.01	0.29	0.44
19.04	0.01	0.19	0.28
19.2	0.01	0.14	0.17
19.36	0.02	0.11	0.11
19.52	0.03	0.07	0.08
19.68	0.02	0.03	0.07
19.84	0.03	0	0.07
20	0.03	0	0.05
20.16	0.04	0	0.02
20.32	0.05	0.01	0
20.48	0.04	0.02	0
20.64	0.03	0.02	0.01
20.8	0.02	0.01	0.02
20.96	0.01	0.02	0.01
21.12	0.01	0.03	0.01
21.28	0.01	0.04	0.01
21.44	0	0.04	0.01
21.6	0	0.03	0.02
21.76	0	0.04	0.03
21.92	0.01	0.03	0.04
22.08	0.01	0.02	0.03
22.24	0.01	0.03	0.01
22.4	0.01	0.05	0
22.56	0.01	0.05	0.01
22.72	0.01	0.06	0.01
22.88	0.02	0.08	0.01
23.04	0.02	0.1	0.01
23.2	0.02	0.12	0.01
23.36	0.02	0.11	0.03
23.52	0.02	0.12	0.05
23.68	0.04	0.14	0.07
23.84	0.04	0.19	0.1
24	0.04	0.24	0.14
24.16	0.04	0.26	0.17
24.32	0.03	0.25	0.19
24.48	0.03	0.23	0.22
24.64	0.03	0.23	0.26
24.8	0.02	0.24	0.29
24.96	0.02	0.24	0.29

## Sheet: Fig3F
	Experiment 1									Experiment 2
	Normalized fluorescence intenstiy									Normalized fluorescence intenstiy
distance (pixels)	Microtubule 1	Microtubule 2	Microtubule 3	Microtubule 4	Microtubule 5	Microtubule 6	Microtubule 7	Microtubule 8		Microtubule 1	Microtubule 2	Microtubule 3	Microtubule 4	Microtubule 5	Microtubule 6	Microtubule 7	Microtubule 8		Mean
-10	-2150.75	-675	-1264	-646	-1900	-2453	-1198	-376.5		-848.637	-711.884	-1453.89	-7.631	-1892.47	-738.895	-694.935	-1551.54		-1160.2
-9	-1941	-762	-1038	-990	-1807	-2177.5	-1198	-382.5		-762.91	-690.099	-1507.01	-250.464	-1957.35	-755.846	-714.025	-1289.87		-1138.97
-8	-2029.75	-813	-1079	-1145	-1698	-1915.5	-1248	-268		-949.848	-671.118	-1232.52	-261.589	-1931.74	-1026.05	-759.993	-986.778		-1125.99
-7	-1933.25	-813	-1114	-1270	-1463	-1805.5	-1031	-208		-1116.48	-620.666	-971.445	-46.267	-1843.87	-1080.17	-890.523	-1102.3		-1081.84
-6	-1652.5	-713	-1075	-1394	-1452	-1790.5	-966	-242.5		-1199.36	-650.098	-915.749	-13.141	-1724.47	-964.884	-1072.77	-862.856		-1043.05
-5	-1374	-782	-963	-1437	-1411	-1841.5	-817	-294.5		-1142.26	-175.899	-870.598	63.916	-1615.25	-886.969	-798.449	-638.598		-936.507
-4	-1102.75	-742	-1078	-1437	-1409	-1997.5	-824	-299		-1130	-196.684	-577.842	149.105	-1390.61	-943.54	-589.587	-765.748		-895.885
-3	-836	-546	-1162	-1493	-1200	-2010	-953	-342		-1245.54	-144.106	-729.44	15.533	-1146.85	-950.043	-586.626	-867.767		-887.303
-2	-581.25	-287	-971	-1549	-562	-1541	-529	-377.5		-1021.12	-99.311	-750.038	72.388	-659.85	-722.93	-336.34	-452.226		-647.948
-1	-440.25	-156	-566	-1134	-404	-784	-313	-265.5		-627.121	-29.687	-467.825	46.01	-381.371	-400.175	-213.825	-47.22		-386.498
0	0	0	0	0	0	0	0	0		0	0	0	0	0	0	0	0		0
1	618.25	-235	505	845	560	709.5	307	240.5		621.926	228.165	165.915	361.169	598.266	735.442	537.777	712.033		469.434
2	1112.25	277	615	1137	1359	1348	732	316.5		1196.56	651.917	257.438	670.536	956.127	1471.06	1007.18	875.289		873.929
3	1495.25	545	490	1107	2222	1729.5	863	329		1459.18	1084.72	105.642	770.296	1272.34	2014.4	742.72	1326.21		1097.27
4	1581.75	271	411	952	2840	1419	907	359		1602.92	1471.36	6.997	555.384	1274.11	2120.73	887.872	1128.9		1111.81
5	1483.5	544	64	1184	3461	663.5	1205	445.5		2055.49	1333.57	125.215	315.315	1136.96	2138.51	771.192	926.402		1115.82
6	1317	750	187	1184	3645	553.5	1190	660.5		2197.08	1361.86	177.666	510.623	1205.15	1963.93	806.78	899.489		1163.1
7	987.25	868	429	1284	3270	941	1150	894		1804.87	1514.67	1.303	672.046	1123.93	1924.71	744.227	751.678		1147.54
8	898	807	474	1668	3145	1025	1139	924.5		1494.98	1206.18	-30.026	487.104	833.404	2182.86	740.536	686.627		1105.14
9	1209	714	544	1930	2418	1060.5	860	741.5		1287.15	1088.68	-20.96	416.795	514.453	2707.32	458.272	510.73		1027.47
10	1430.5	598	361	1823	2836	1172	482	505.5		1179.7	946.805	-308.272	430.855	431.587	2772.33	412.582	437.3		969.43
Experiment #	kymographs	w/end patches
1	17	13	0.764706
2	41	34	0.829268
3	15	12	0.8
TOTAL	73	59	0.808219

## Sheet: Fig3I
All points			Averages
Curvature (1/um)	Intensity (a.u.)		AVEcurvature (1/um)	AVEintensity (a.u.)	STDcurvature (1/um)	STDintensity (a.u.)
1.76245e-15	1.752		0.049353	1.7356	0.030362	0.562207
8.80636e-05	2.1522		0.145629	1.91629	0.029561	0.706761
0.000192038	1.2118		0.251816	1.71837	0.026996	0.583078
0.000215904	1.752		0.349494	1.68656	0.028808	0.679947
0.000230203	2.0823		0.449931	2.05759	0.028216	0.938316
0.000361525	1.1309		0.552343	1.53918	0.028825	0.377716
0.000369658	1.2118		0.647123	1.62081	0.027858	0.477515
0.000440336	1.752		0.753302	1.70497	0.028822	0.486217
0.000524849	2.3903		0.846768	2.02435	0.029945	0.828545
0.000673559	2.3279		0.948384	1.68452	0.029114	0.439693
0.000722854	1.4372		1.04783	1.52974	0.028977	0.304226
0.000724047	1.2159		1.14753	1.53696	0.026015	0.291908
0.000781639	2.0823		1.24441	1.4553	0.029132	0.356786
0.000813446	2.3903		1.34539	1.72081	0.029135	0.588123
0.000915842	2.3279		1.44143	1.39773	0.02709	0.229985
0.000953782	1.0815		1.55468	1.2229	0.034731	0.237128
0.000962363	1.2118		1.64539	1.62736	0.028645	0.310908
0.00116746	2.3279		1.74701	1.61326	0.032092	0.345646
0.00119391	2.0823		1.85095	1.70099	0.029387	0.355671
0.00122764	1.2159		1.94725	1.68233	0.02718	0.36901
0.0014287	2.3279		2.04705	1.67326	0.031214	0.380161
0.00158745	1.2118		2.15241	1.90557	0.0297	0.128969
0.00169986	1.6455		2.25367	2.00701	0.030622	0.0104802
0.00170404	1.2159		2.34861	1.88973	0.027631	0.12086
0.00172372	1.1309		2.45063	1.84187	0.031385	0.13757
0.00182374	2.3903		2.55286	1.8863	0.027935	0.0951163
0.00184327	2.0823		2.65521	1.90027	0.029731	0.0962433
0.00198122	1.6455		2.73625	1.86692	0.028455	0.0821127
0.00210779	1.4372		2.83901	1.7635	0.015096	0
0.00211109	2.0823
0.00211531	1.0815
0.0021381	2.4991
0.00215442	1.2159
0.00219159	2.3903
0.00224635	1.3101
0.0022731	1.6455
0.00256743	1.1309
0.0025758	1.6455
0.00257991	1.2159
0.00261731	2.4991
0.00288965	1.6455
0.00294054	1.3101
0.00295638	2.0823
0.00298334	2.0823
0.0030837	2.3903
0.00312319	1.9773
0.00321497	1.9889
0.00352002	1.4372
0.0035521	1.9889
0.00361	2.3903
0.00367156	1.3101
0.00369339	1.1309
0.00381222	2.0823
0.00390137	1.9889
0.00405116	1.0815
0.00408286	1.9773
0.0041158	2.1522
0.00412268	2.0823
0.00426315	1.9889
0.00428837	2.1522
0.00430521	2.3903
0.004441	1.3101
0.00459924	2.0823
0.00463778	1.9889
0.00489923	1.3658
0.0049714	1.4372
0.00502563	1.9889
0.00506909	2.3903
0.00515568	1.0912
0.00525054	1.3101
0.00534389	2.0823
0.00534589	1.6292
0.00542708	1.9889
0.00548878	2.3903
0.00555238	1.1309
0.00584249	1.9889
0.00605362	1.6292
0.00610187	1.3101
0.00627227	1.9889
0.00628323	1.4372
0.00656923	1.7692
0.0066218	2.0823
0.00663493	2.3903
0.00671681	1.9889
0.00672384	2.0475
0.00688317	2.4991
0.00699678	1.3101
0.00717637	1.0815
0.0071765	2.308
0.00730544	1.1309
0.00735795	2.0475
0.00736235	1.3658
0.00738313	2.4991
0.00765177	2.308
0.00774419	2.3903
0.00786744	1.4372
0.00793713	1.3101
0.00795727	2.0475
0.00795818	2.0823
0.00811076	1.7692
0.00814302	2.308
0.00816692	1.0912
0.00832228	2.1522
0.00848418	2.1522
0.00852313	2.0475
0.00864786	1.1718
0.00865069	2.308
0.0088171	2.7168
0.00892481	1.3101
0.00895714	1.1309
0.00901201	1.4372
0.00903225	1.0992
0.00905679	2.0475
0.00917521	2.308
0.00935484	2.6956
0.00943053	1.0992
0.00955949	2.0475
0.00969401	1.7692
0.00971701	2.308
0.00984319	1.2998
0.00985424	2.7168
0.00996182	1.3101
0.00996238	1.3658
0.0100324	2.0475
0.0101982	1.9773
0.0102707	1.2998
0.0102766	1.7196
0.0103289	1.0815
0.0104768	2.0475
0.0105119	1.1309
0.0107137	1.2998
0.0107953	1.4372
0.0108136	2.6956
0.0108543	1.7196
0.0108562	2.7168
0.0108937	2.0475
0.0110502	1.3101
0.0111486	1.0912
0.0111726	1.2998
0.0112842	1.6844
0.0113193	1.7692
0.0114155	1.5309
0.0114507	1.7196
0.0116179	2.4991
0.011648	1.2998
0.0116495	1.6844
0.0117059	1.4372
0.0118235	2.7168
0.011974	1.1309
0.0119905	1.6844
0.0120662	1.7196
0.0121405	1.1776
0.0121594	2.4991
0.0121921	1.3491
0.0123082	1.6844
0.0123363	2.6956
0.0125304	2.1522
0.0126037	1.6844
0.0126507	1.1776
0.0126746	2.1522
0.0127013	1.7196
0.0127051	1.3658
0.0127568	2.7168
0.0128778	1.6844
0.0129868	1.7692
0.0131314	1.6844
0.0131792	1.3349
0.0133475	1.1309
0.0133564	2.2112
0.0133655	1.6844
0.0133896	1.3491
0.0135084	1.0815
0.0135808	1.6844
0.0136566	2.7168
0.0137267	1.3349
0.0137545	1.4372
0.0137783	1.6844
0.0138029	2.5403
0.0138989	1.6903
0.0139249	2.6956
0.0139586	1.4869
0.0139927	1.6903
0.0140322	2.2112
0.0140842	1.8212
0.0141003	1.0912
0.0141225	1.4869
0.0141731	1.8212
0.0142593	1.8212
0.0142708	1.4869
0.0142937	1.3349
0.0143425	1.8212
0.0143646	1.5309
0.0144042	1.7024
0.0144226	1.8212
0.0144993	1.8212
0.0145233	1.7024
0.0145236	2.7168
0.0145724	1.8212
0.0146289	1.7024
0.0146364	1.1309
0.0146416	1.9123
0.0146451	1.3491
0.0146968	1.7692
0.0147066	1.9123
0.0147215	1.7024
0.014729	2.2112
0.0147673	1.9123
0.0148018	1.7024
0.0148233	1.9123
0.0148703	1.7024
0.0148744	1.9123
0.0148811	1.3349
0.0149201	1.9123
0.0149276	1.7024
0.0149603	1.5369
0.0149742	1.5543
0.0149946	1.5369
0.0150107	1.5543
0.0150226	1.5543
0.0150377	1.5543
0.015044	1.5543
0.0150554	1.5543
0.0150584	1.5543
0.0150645	1.5543
0.0150653	1.5543
0.0153584	2.7168
0.0154473	2.2112
0.0154895	1.3349
0.0155811	2.6956
0.0155964	1.3658
0.0158444	1.144
0.0159608	1.3491
0.0161197	1.3349
0.0161615	2.7168
0.0161877	2.2112
0.0163424	2.4991
0.0164495	2.3337
0.0167142	1.0815
0.0167393	2.1522
0.0167444	1.4372
0.0167724	1.3349
0.0168585	2.1522
0.0169337	2.7168
0.0169462	2.4991
0.0169506	2.2112
0.0169753	1.144
0.0169875	1.5309
0.0170218	1.0912
0.0171378	1.9773
0.0173069	2.6956
0.0173393	1.2634
0.0174484	1.2416
0.0176755	2.7168
0.0177367	2.2112
0.0179446	1.4863
0.0180326	1.144
0.0181484	1.2416
0.018245	2.3337
0.0182559	1.4863
0.0183875	2.7296
0.0185463	2.2112
0.0185724	1.4863
0.0186425	1.3658
0.0187829	1.2634
0.01887	1.5309
0.0188735	1.4689
0.0188941	1.4873
0.0190197	1.144
0.0190704	2.7296
0.0191041	2.6956
0.0192211	1.4873
0.01938	2.2112
0.0195535	1.4873
0.0195744	1.5309
0.0196243	1.4689
0.0197248	2.7296
0.0197643	1.4372
0.0198913	1.4873
0.0199125	1.0912
0.0199398	1.144
0.0199459	1.0815
0.0200834	2.3337
0.0202346	1.4873
0.0202383	2.2112
0.0202943	1.2634
0.0203514	2.7296
0.0204019	1.4689
0.0205834	1.4873
0.020796	1.144
0.0209378	1.4873
0.0209479	2.1522
0.0209506	2.0819
0.0209746	2.6956
0.0210352	2.1522
0.0210568	2.4991
0.0211217	2.2112
0.021207	1.4689
0.0212977	1.5131
0.0214198	1.0912
0.0215232	2.0819
0.0215915	1.144
0.0216634	1.5131
0.0217435	2.4991
0.0218496	1.3658
0.021876	1.2634
0.0219648	2.3337
0.0220309	2.634
0.0220348	1.5131
0.0220408	1.4689
0.0220698	2.0819
0.022125	1.5309
0.0223289	1.144
0.0224119	1.5131
0.0225909	2.0819
0.0227948	1.5131
0.0228136	1.4372
0.0229042	1.4689
0.0229136	1.0912
0.0229202	2.6956
0.0229662	2.634
0.0230112	1.144
0.0230872	2.0819
0.0231835	1.5131
0.023203	1.0815
0.0235308	1.2634
0.0235593	2.0819
0.0235781	1.5131
0.0236409	1.144
0.0237981	1.4689
0.0238893	2.3337
0.0239282	2.634
0.0239383	1.9773
0.0239785	1.5131
0.0240078	2.3353
0.0242207	1.0692
0.0243849	1.4244
0.0243944	1.0912
0.0244333	2.3353
0.0246388	1.5309
0.0247237	1.3163
0.0247529	1.0692
0.0247971	1.4244
0.0248364	2.3353
0.0249175	2.634
0.0249429	2.6956
0.0251553	2.1522
0.0252037	2.1522
0.0252154	1.4244
0.0252176	2.3353
0.0252241	1.3658
0.0252399	1.0692
0.0252615	1.2634
0.0255775	2.3353
0.0256395	1.4244
0.025682	1.7357
0.025684	1.0692
0.0257609	2.4991
0.0258568	2.3337
0.0258626	1.0912
0.0258915	1.4372
0.0259168	2.3353
0.0259345	2.634
0.0260684	1.7098
0.0260697	1.4244
0.0260873	1.1266
0.0262359	2.3353
0.0262629	2.467
0.0264412	1.5309
0.0264518	1.1266
0.0264527	2.467
0.0264848	1.0815
0.0265058	1.4244
0.0265354	2.3353
0.0265514	2.4991
0.0266247	2.727
0.0266374	2.467
0.0266741	1.7357
0.0267795	1.1266
0.0267797	2.3328
0.0268158	1.8345
0.0268165	2.467
0.0269318	2.3328
0.0269479	1.3407
0.0269798	2.634
0.0269895	2.467
0.0270444	2.6956
0.027071	1.2634
0.0270724	1.1266
0.0270778	2.3826
0.0270809	2.3328
0.0271157	1.5309
0.027156	2.467
0.0272268	2.6887
0.0273154	2.6767
0.0273185	1.0912
0.0273218	2.3826
0.0273321	1.1266
0.0273693	2.6887
0.0273959	1.3407
0.0274672	2.6767
0.0275083	2.6887
0.0275484	2.3826
0.0275605	1.199
0.0276108	2.6767
0.0276435	2.1166
0.0277012	1.7357
0.0277456	2.6767
0.027758	2.3826
0.0277591	1.199
0.0277748	2.1166
0.0278499	1.3407
0.0278672	1.9148
0.027871	2.6767
0.0279019	2.1166
0.0279295	1.199
0.0279512	2.3826
0.0279863	2.6767
0.0280246	2.1166
0.0280539	2.634
0.0280734	1.199
0.0280908	2.6767
0.0281284	2.3826
0.0281426	2.1166
0.0281838	1.9309
0.028192	1.199
0.0282559	2.1166
0.0282644	1.9309
0.0282867	1.199
0.0282903	2.3826
0.0283098	1.3235
0.0283319	1.486
0.0283589	1.199
0.028364	2.4686
0.0283853	1.486
0.0284099	1.199
0.0284239	1.486
0.0284371	2.3826
0.0284407	1.486
0.0284467	1.486
0.0284527	1.486
0.0284669	2.4686
0.0285642	2.2534
0.0285695	2.3826
0.0286556	2.2534
0.0286879	2.8889
0.0287409	2.2534
0.0287625	1.0912
0.0287645	1.7357
0.0287728	1.3658
0.0287756	1.3235
0.0287926	2.8889
0.0288199	2.2534
0.0288843	2.8889
0.0288922	2.2534
0.0289576	2.2534
0.0289622	1.2634
0.0289632	2.2342
0.0289975	1.4372
0.0290157	2.2534
0.0290299	2.2342
0.0290664	1.982
0.0290847	2.2342
0.0291091	1.982
0.0291281	2.2342
0.0291437	2.8057
0.0291572	2.634
0.0291605	2.2342
0.0291698	2.8057
0.0291821	2.8057
0.029187	2.8057
0.0291935	2.8057
0.029195	2.8057
0.0292266	2.6956
0.0292473	1.3235
0.0293606	2.1522
0.0293629	2.1522
0.0295553	1.5309
0.0297249	1.3235
0.0297909	1.0815
0.0298653	1.7357
0.0299204	1.9148
0.0301951	1.0912
0.0302082	1.3235
0.0302904	1.6352
0.030455	1.7937
0.0305959	2.2491
0.0306972	1.3235
0.0309381	1.3567
0.0310046	1.7357
0.031192	1.3235
0.0313699	2.4991
0.0314538	1.6352
0.0314913	2.6956
0.0316165	1.0912
0.0316923	1.3235
0.0319573	1.5309
0.0320163	1.9148
0.0321307	1.4372
0.032184	1.7357
0.0321981	1.3235
0.0325024	1.3658
0.0326481	1.6352
0.0327094	1.3072
0.0330018	1.3567
0.0330271	1.0912
0.0331206	1.0815
0.0332261	1.3072
0.0334046	1.7357
0.0335121	2.1522
0.0335628	2.1522
0.0337479	1.3072
0.0338401	1.9267
0.0338736	1.6352
0.0341237	1.5309
0.0341547	1.9148
0.0342749	1.3072
0.0343216	1.5309
0.0344273	1.0912
0.034668	1.7357
0.0348068	1.3072
0.0351308	1.6352
0.0351389	1.7937
0.0351565	1.3567
0.0352904	1.4372
0.0353436	1.3072
0.0358174	1.0912
0.0358851	1.3072
0.0359453	1.4837
0.0359754	1.5394
0.0361992	2.4991
0.0362749	1.9267
0.0363352	1.9148
0.0364199	1.3658
0.0364202	1.7726
0.0364311	1.3072
0.0364734	1.0815
0.036648	1.5309
0.0369459	1.4132
0.0369814	1.3072
0.0371075	2.2491
0.0371977	1.0912
0.0373284	2.3192
0.0374054	1.3567
0.0375359	1.3072
0.0376503	2.1522
0.0377423	1.7726
0.037761	2.1522
0.0379769	1.4132
0.0380943	1.4085
0.0384757	1.4372
0.0385576	1.9148
0.0385686	1.0912
0.0386565	1.4085
0.0387284	2.3192
0.0387973	2.3184
0.0389362	1.5309
0.0390394	1.4132
0.0390974	1.7726
0.0392221	1.4085
0.0397518	1.3567
0.039791	1.4085
0.0398129	1.7937
0.0398487	1.0815
0.0399304	1.0912
0.0401344	1.3229
0.0401771	2.3192
0.0403629	1.4085
0.040486	1.7726
0.0405323	1.3658
0.0408215	1.9148
0.0409375	1.4085
0.0410392	2.4991
0.0411861	1.5309
0.0412628	1.3229
0.0412834	1.0912
0.0414088	2.3184
0.0415144	1.4085
0.0416759	2.3192
0.041686	1.4372
0.0417765	2.4991
0.0419085	1.7726
0.041912	1.5309
0.0419542	2.1522
0.0420935	1.4085
0.0421992	1.3567
0.0424258	1.3229
0.0426279	1.0912
0.0426743	1.4085
0.0430889	1.2659
0.0431264	1.9148
0.0432266	2.3192
0.0432458	1.0815
0.0432565	1.4085
0.0433652	1.7726
0.0433975	1.5309
0.0434699	2.2491
0.0436243	1.3229
0.0438397	1.4647
0.0439642	1.0912
0.044111	2.3184
0.0443389	1.2659
0.0444236	1.4647
0.0444769	1.7937
0.0445756	1.2659
0.0447509	1.3567
0.0448308	2.3192
0.0448471	1.3658
0.0448565	1.7726
0.0448597	1.3229
0.0449204	1.4372
0.0450076	1.4647
0.0452926	1.0912
0.0454718	1.9148
0.0455451	1.2659
0.0455704	1.5309
0.0455915	1.4647
0.0458899	2.4991
0.0460806	1.2659
0.0461329	1.3229
0.0461414	2.1522
0.0461748	1.4647
0.0463827	1.7726
0.0464901	2.3192
0.0466135	1.0912
0.0466642	1.0815
0.0467071	1.2454
0.0467569	1.4647
0.0469055	2.3184
0.0473374	1.4647
0.0474104	1.3567
0.0474451	1.3229
0.0476037	1.2659
0.0477046	1.5309
0.0478242	1.2454
0.0478572	1.9148
0.0479158	1.4647
0.047927	1.0912
0.0479442	1.7726
0.0481779	1.4372
0.0482064	2.3192
0.0484916	1.4647
0.0487977	1.4707
0.048896	1.2454
0.0490642	1.4647
0.0491309	1.7937
0.0491451	1.2659
0.0492335	1.0912
0.0493715	2.0221
0.0495412	1.7726
0.0496329	1.4647
0.0496804	2.2491
0.0497935	2.3184
0.0498	1.5309
0.0499222	1.2454
0.0499815	2.3192
0.050103	1.0815
0.0501813	1.3567
0.0501918	1.4707
0.0501973	1.4647
0.0502819	1.9148
0.0503218	2.1522
0.0505333	1.0912
0.0507048	1.2659
0.0507567	1.5658
0.0509025	1.2454
0.0511164	1.6857
0.051174	1.7726
0.0513105	1.5658
0.0514578	1.4372
0.0516287	1.4707
0.0518172	2.3192
0.0518266	1.0912
0.0518368	1.2454
0.0518579	1.5658
0.0522826	1.2659
0.0523984	1.5658
0.0525965	1.6857
0.0527249	1.2454
0.0527453	1.9148
0.0527763	2.3184
0.0528428	1.7726
0.0529311	1.5658
0.0530672	1.3567
0.0531098	1.4707
0.0531137	1.0082
0.0534554	1.5658
0.0535618	1.0815
0.0535668	1.2454
0.0537154	3.319
0.0537751	1.7937
0.0538786	1.2659
0.0539705	1.5658
0.0541131	2.0221
0.0541225	1.6857
0.0543626	1.2454
0.0543949	1.0082
0.0544756	1.5658
0.0544943	2.1522
0.0545477	1.7726
0.0546363	1.4707
0.0547245	1.0206
0.0547591	1.4398
0.0549699	1.5658
0.0551124	1.2454
0.0552465	1.9148
0.0554167	2.8493
0.0554526	1.5658
0.0554928	1.2659
0.0556705	1.0082
0.055696	1.6857
0.0557365	2.2491
0.0558165	1.2454
0.0558533	1.0206
0.0558552	2.3184
0.0559229	1.5658
0.0560717	1.3567
0.0562098	1.4707
0.056289	1.7726
0.0563799	1.2231
0.056475	1.2454
0.0565631	2.8493
0.0568226	1.2161
0.0569406	1.0082
0.0569997	1.0206
0.0570398	1.0815
0.0570883	1.2454
0.057125	1.2659
0.0572503	1.2161
0.0573184	1.6857
0.0576568	1.2454
0.057662	1.2161
0.0577213	2.8493
0.0577848	1.6825
0.0578316	1.4707
0.0580567	1.2161
0.0580667	1.8189
0.0580809	1.2889
0.0581639	1.0481
0.0581811	1.2454
0.0582055	0.9928
0.0584094	1.7937
0.0584336	1.2161
0.0586092	2.0556
0.058658	2.1522
0.0586616	1.2454
0.0587753	1.2659
0.0587915	1.2161
0.0588913	2.8493
0.0589913	1.6857
0.0590311	2.3184
0.0590796	2.0221
0.0590988	1.2454
0.0591296	1.2161
0.0591985	1.3567
0.0593461	1.0481
0.0594469	1.2161
0.0594656	0.9928
0.0594936	1.2652
0.0595031	1.4826
0.0597423	1.2161
0.0598464	1.2652
0.059881	1.8189
0.0599621	2.0556
0.0600148	1.2161
0.0600729	2.8493
0.060158	1.2652
0.0602635	1.2161
0.0603593	1.6825
0.0604293	1.2652
0.0604436	1.2659
0.0604872	1.2161
0.0605363	1.0815
0.0605463	1.0481
0.060661	1.2652
0.060685	1.2161
0.0607163	1.6857
0.060721	0.9928
0.0608539	1.2652
0.0608558	1.2161
0.0609985	1.2652
0.0610089	1.2652
0.0611122	1.2652
0.061127	1.2652
0.0611958	1.2652
0.061209	1.2652
0.061226	1.4826
0.0612483	1.2652
0.0612559	1.2652
0.0612662	2.8493
0.0612687	1.2652
0.0613483	2.0556
0.0614223	1.2889
0.0616362	2.2491
0.0617113	2.0024
0.0617318	1.8189
0.0617648	1.0481
0.0618756	1.843
0.061972	0.9928
0.0621299	1.2659
0.0621827	0.8181
0.0623052	2.3184
0.0624512	1.3567
0.0624712	2.8493
0.0624949	1.9429
0.0627688	1.7901
0.062812	2.1522
0.0629689	1.6825
0.0630016	1.4826
0.0630016	1.0481
0.0630338	1.7937
0.0631295	2.0024
0.0632188	0.9928
0.0636191	1.8189
0.0636292	1.843
0.0636532	0.8181
0.0636878	2.8493
0.063834	1.2659
0.0640507	1.0815
0.0642243	1.7901
0.064257	1.0481
0.0642787	2.0221
0.0643289	1.9429
0.0644617	0.9928
0.0645791	1.5478
0.0645818	2.0024
0.0647822	1.2889
0.0648316	1.4826
0.0649159	2.8493
0.0651592	0.8181
0.0654313	1.843
0.0655309	1.0481
0.0655429	1.8189
0.0655559	1.2659
0.0656127	1.6825
0.0656782	2.3184
0.0657009	0.9928
0.0657157	2.1044
0.0658337	1.3567
0.0659717	1.5478
0.0660689	2.4167
0.0661556	3.2615
0.06622	1.9429
0.0667015	0.8181
0.0667177	1.4826
0.0668237	1.0481
0.0669366	0.9928
0.0669554	2.1522
0.0672436	2.1044
0.0672785	0.978
0.0672831	1.8551
0.0672955	1.3182
0.0673774	2.2491
0.0673976	1.6507
0.0674068	3.2615
0.0675031	1.8189
0.0675821	1.0815
0.0675917	2.4167
0.0676485	1.7937
0.0681353	1.0481
0.0681597	1.2889
0.068169	0.9928
0.06817	1.9429
0.0682809	0.8181
0.0682896	1.6825
0.0686613	1.4826
0.0686694	3.2615
0.0687798	0.9794
0.0688091	2.1044
0.0688574	1.6507
0.0690527	1.3182
0.0691507	2.3184
0.0691508	2.4167
0.0691858	1.8551
0.0693497	1.4512
0.0693984	0.9928
0.069466	1.0167
0.0694995	1.8189
0.0697184	2.0221
0.0698981	0.8181
0.0699434	3.2615
0.0701806	1.9429
0.0703171	0.9794
0.070352	1.6507
0.0704129	2.1044
0.070625	0.9928
0.0706643	1.4826
0.070747	2.4167
0.0708157	1.0167
0.0708274	1.3182
0.0709697	2.8493
0.0709983	1.6825
0.0710871	2.1522
0.07113	1.0815
0.0711405	1.8551
0.0712288	3.2615
0.0715319	1.8189
0.0715538	1.2889
0.0715541	0.8181
0.0718491	0.9928
0.0718822	1.6507
0.0718912	0.9794
0.0720558	1.748
0.0721846	1.0936
0.0722534	1.7937
0.0722538	1.9429
0.0723813	2.4167
0.0725254	3.2615
0.0726196	1.3182
0.0727233	2.3184
0.0727282	1.5605
0.0729586	2.2491
0.0730028	1.2827
0.0730707	0.9928
0.0731486	1.8551
0.0732495	0.8056
0.0734489	1.6507
0.0735031	0.9794
0.0735729	1.0936
0.0736	1.8189
0.0737377	1.6825
0.0737388	1.748
0.0738331	3.2615
0.0740542	2.4167
0.0742903	0.9928
0.0743914	1.9429
0.074429	1.3182
0.0746934	1.0815
0.074855	1.5605
0.0749634	1.2889
0.0749805	1.0936
0.0749852	0.8056
0.075053	1.6507
0.075152	3.2615
0.0751537	1.0077
0.0752063	2.1522
0.0752112	1.8551
0.0754066	2.0221
0.0754626	1.748
0.0755078	0.9928
0.0757036	1.8189
0.0757667	2.4167
0.0762555	1.3182
0.0763964	2.3184
0.0764077	1.0936
0.076482	3.2615
0.0765064	1.6825
0.0765954	2.3305
0.0766952	1.783
0.0767237	0.9928
0.0767621	0.8056
0.0767969	1.2827
0.0768439	1.0077
0.0768486	1.7937
0.0770462	1.5605
0.0771341	1.605
0.0772282	1.748
0.0773296	1.8551
0.0775196	2.6334
0.0778228	3.2615
0.0778422	1.8189
0.0778544	1.0936
0.077938	0.9928
0.0780991	1.3182
0.078148	1.605
0.0782717	1.0815
0.0782943	1.605
0.0783765	1.783
0.0783784	2.2491
0.0783875	1.2889
0.0785747	1.0077
0.0785809	0.8056
0.0788678	2.3305
0.0790364	1.748
0.079151	0.9928
0.079165	1.605
0.0791746	3.2615
0.0793029	1.6825
0.0793038	1.5605
0.0793121	2.1522
0.0793136	2.6334
0.0793207	1.0936
0.0794524	1.605
0.079505	1.8954
0.0796942	3.2883
0.0799595	1.3182
0.0800153	1.3231
0.0800978	1.783
0.08017	2.3184
0.0801851	1.605
0.0803469	1.0077
0.0803629	0.9928
0.0804426	0.8056
0.080537	3.2615
0.0806084	1.605
0.0807356	1.2827
0.0808067	1.0936
0.080888	1.748
0.0811496	2.6334
0.0812083	1.5764
0.0812107	2.3305
0.0813512	2.0221
0.081434	1.7937
0.0815739	0.9928
0.0816296	1.5605
0.0817387	1.8954
0.0817622	1.605
0.081825	1.2889
0.0818366	1.3182
0.0818601	1.783
0.081864	1.0815
0.0819102	3.2615
0.0821259	1.6825
0.0821617	1.0077
0.0822225	1.3231
0.0822347	1.5764
0.0823124	1.0936
0.0823478	0.8056
0.0827841	1.748
0.0827841	0.9928
0.0829137	1.605
0.0830284	2.6334
0.0832645	1.5764
0.0832939	3.2615
0.0834034	2.1522
0.0836261	2.3305
0.0836358	2.2491
0.0836642	1.783
0.0837303	1.3182
0.0838379	1.0936
0.0839939	0.9928
0.0840078	2.3865
0.08402	1.0077
0.0840254	1.5605
0.0840321	1.8954
0.0840444	2.3184
0.0840631	1.605
0.0842718	3.2883
0.0842976	1.5764
0.0842976	0.8056
0.0844631	1.3231
0.084688	3.2615
0.0847254	1.55
0.0848226	1.2827
0.0848859	3.2883
0.0849508	2.6334
0.0849738	1.6825
0.0852033	0.9928
0.0852101	1.605
0.0852748	1.2889
0.085334	1.5764
0.0853815	1.4849
0.0853833	1.0936
0.0854697	1.0815
0.0855111	1.9145
0.0856404	1.3182
0.0859228	1.0077
0.0859525	1.4849
0.0860098	1.7937
0.0860925	3.2615
0.0861162	2.3305
0.0861335	2.3865
0.0861953	2.8493
0.0862926	0.8056
0.0863548	1.605
0.086374	1.5764
0.0863862	1.8954
0.0864126	0.9928
0.0864932	1.5605
0.0865255	1.4849
0.0867128	1.55
0.0867366	1.3231
0.0869177	2.6334
0.0869485	1.0936
0.0871004	1.4849
0.0874018	1.9145
0.0874175	1.6301
0.0874795	2.1522
0.0874971	1.605
0.0875072	3.2615
0.0875605	2.0221
0.0875666	1.3182
0.087622	0.9928
0.0876773	1.4849
0.087845	1.6825
0.0878713	1.0584
0.0880191	2.3184
0.0880551	2.8785
0.0882564	1.4849
0.088319	2.3865
0.0883338	0.8056
0.0884645	1.6301
0.0885335	1.0936
0.0886371	1.605
0.0886832	2.3305
0.0887298	2.2491
0.0887357	1.2889
0.0887472	1.55
0.0888025	1.8954
0.0888194	3.2883
0.0888316	0.9928
0.0888375	1.4849
0.0889298	2.6334
0.0889319	3.2615
0.0890348	1.5605
0.0890421	1.3231
0.0890615	1.2827
0.0890879	1.0815
0.0893373	1.9145
0.0894209	1.4849
0.0895089	1.3182
0.0895152	1.6301
0.0897746	1.605
0.0898663	1.0584
0.0900065	1.4849
0.0900417	0.9928
0.0901195	3.2883
0.0901249	2.062
0.0901367	2.3688
0.0901384	1.2192
0.0903666	3.2615
0.090422	0.8419
0.0905658	2.3865
0.0905697	1.6301
0.0905759	2.2603
0.0905945	1.4849
0.0907377	1.6825
0.0908296	1.55
0.0909097	1.605
0.090988	1.6487
0.0910828	1.7098
0.0911848	1.4849
0.0912524	0.9928
0.0912822	1.8954
0.0913185	1.9145
0.0913293	2.3305
0.091377	2.062
0.0913788	1.4519
0.0914669	1.3182
0.0915393	2.5068
0.0916279	1.6301
0.0916522	1.8375
0.0917631	1.2192
0.0917775	1.4849
0.0918111	3.2615
0.0919091	1.0584
0.0919894	2.8785
0.0920423	1.605
0.0920937	2.3184
0.0922067	1.2889
0.0922376	2.3688
0.0923727	1.4849
0.092464	0.9928
0.092558	0.8419
0.0926416	2.062
0.0926899	1.6301
0.0927177	1.0815
0.0927673	1.6934
0.0927927	2.9454
0.0928758	2.3865
0.0929606	1.8177
0.0929705	1.4849
0.0930931	1.6487
0.0931724	1.605
0.0932652	2.9192
0.0933386	3.2883
0.0933465	1.9145
0.0934077	1.2192
0.0934405	1.3182
0.0934559	1.2827
0.0935709	1.4849
0.0936503	1.6825
0.0936599	2.2491
0.0936766	0.9928
0.0936821	2.9454
0.093746	1.4519
0.0937559	1.6301
0.0938265	1.8954
0.0939185	2.062
0.0940008	1.0584
0.0940423	2.0221
0.0940569	2.7579
0.0941739	1.4849
0.0942999	1.605
0.0943474	1.8375
0.0943918	2.3688
0.0945496	2.9454
0.0947288	2.9192
0.0947427	0.8419
0.0947797	1.4849
0.0948258	1.6301
0.0948903	0.9928
0.095072	1.2192
0.0950912	1.6934
0.0951323	2.2603
0.0951413	1.8177
0.0952077	2.062
0.0952459	1.78
0.0952508	2.2882
0.0953882	1.5618
0.0953952	2.4783
0.0953953	2.9454
0.0954223	1.9145
0.0954248	1.605
0.0954295	1.3182
0.095582	2.5068
0.0956866	1.2889
0.0958998	1.6301
0.0959762	2.8785
0.0959996	1.5618
0.0961055	1.0398
0.0961424	1.0584
0.0961426	1.4519
0.0962018	2.9192
0.0962195	2.9454
0.0962677	2.742
0.0963585	1.0815
0.0964367	1.8954
0.0965088	2.062
0.096547	1.605
0.0965809	1.5399
0.0966005	2.3688
0.0966139	1.5618
0.0967562	1.2192
0.096801	1.7098
0.0968682	2.7579
0.0969768	0.8419
0.0969778	1.6301
0.0970224	2.9454
0.0971223	1.8375
0.0972311	1.5618
0.0973222	1.0398
0.0973724	1.8177
0.0974336	1.3182
0.0974471	1.78
0.0974788	1.6934
0.0975469	1.8533
0.0976666	1.605
0.0976839	2.9192
0.0976927	1.9557
0.0978041	2.9454
0.0978216	2.062
0.0978308	3.2883
0.0978514	1.5618
0.0980093	1.2827
0.0980601	1.6301
0.0983351	1.0584
0.0984256	2.2491
0.09846	1.2192
0.0984747	1.5618
0.0985407	1.0398
0.0985649	2.9454
0.0985675	1.4519
0.0987835	1.4801
0.098865	2.3688
0.0991011	1.5618
0.099114	2.0303
0.099146	2.283
0.0991465	1.6301
0.0991741	1.2889
0.0991751	2.9192
0.0992613	0.8419
0.099305	2.9454
0.0994526	1.3182
0.0995276	1.5399
0.0996066	2.5068
0.0996548	1.6922
0.099679	2.2603
0.0996977	1.78
0.0997213	1.8533
0.0997308	1.5618
0.0997611	1.0398
0.0997656	2.7579
0.0998977	1.4801
0.0999197	1.5399
0.0999317	1.6934
0.0999788	1.8375
0.100009	1.0815
0.100016	2.8785
0.100025	2.9454
0.100184	1.2192
0.100203	1.9557
0.100237	1.6301
0.100309	1.5399
0.100364	1.5618
0.100482	2.283
0.10054	2.742
0.10058	1.0584
0.100675	2.9192
0.100696	1.5399
0.100713	2.4783
0.100724	2.9454
0.100805	2.0221
0.100962	3.4417
0.100984	1.0398
0.101	1.5618
0.101009	1.4801
0.10102	1.4519
0.101069	2.8493
0.10108	1.5399
0.101187	2.4744
0.101332	1.6301
0.101403	3.0443
0.101461	2.0552
0.101486	1.347
0.101597	0.8419
0.101639	1.5618
0.101682	1.0127
0.101828	2.283
0.10184	2.0552
0.10186	2.0303
0.101927	1.2192
0.101947	1.8533
0.101989	1.6922
0.101998	1.78
0.102062	3.0443
0.102118	1.4801
0.102184	2.9192
0.102209	1.0398
0.102215	2.0552
0.102282	1.5618
0.102297	3.2883
0.102432	1.6301
0.102452	1.6934
0.102535	1.7098
0.102587	2.0552
0.102668	1.2889
0.102701	3.0443
0.102725	1.2827
0.102752	2.7579
0.102785	1.9557
0.102879	1.2755
0.102919	1.8375
0.102929	1.5618
0.102956	2.0552
0.103027	2.2491
0.103186	2.1943
0.103223	1.4801
0.103321	3.0443
0.103321	2.0552
0.103436	1.0398
0.103498	1.4519
0.103534	1.347
0.103536	1.6301
0.103567	2.4744
0.103579	1.5618
0.103612	2.5068
0.103669	1.0815
0.103683	2.0552
0.103689	1.1013
0.103701	2.9192
0.103922	3.0443
0.103984	0.8419
0.104042	2.0552
0.10411	2.8785
0.104216	2.2603
0.104224	1.8533
0.104233	1.5618
0.104326	1.4801
0.10435	1.78
0.104364	1.0127
0.104377	1.6922
0.104396	2.1841
0.104458	3.4417
0.104503	3.0443
0.104553	2.1943
0.104644	1.6301
0.104666	1.0398
0.104675	2.0303
0.104747	2.1841
0.10489	1.5618
0.10491	2.742
0.105041	1.445
0.105066	3.0443
0.105094	2.1841
0.105226	2.9192
0.105232	1.2755
0.105426	1.4801
0.105437	2.1841
0.105439	1.9557
0.105471	1.1013
0.105551	1.5618
0.105596	1.347
0.10561	3.0443
0.105758	1.6301
0.105775	2.1841
0.105828	2.7579
0.105899	1.0398
0.105931	2.1943
0.105945	1.8375
0.106001	1.4519
0.106007	2.4744
0.106073	2.4783
0.10611	2.1841
0.106135	3.0443
0.106168	1.2889
0.106216	1.5618
0.106424	0.8419
0.106439	2.1841
0.106523	1.4801
0.106554	1.8533
0.106642	3.0443
0.10674	2.2695
0.106753	1.78
0.10676	2.9192
0.106765	2.1841
0.106818	1.6922
0.106875	1.6301
0.106885	1.5618
0.107086	2.1841
0.107125	1.0127
0.107131	3.0443
0.107134	1.0398
0.107272	1.1013
0.107318	2.1943
0.107337	1.0815
0.107401	2.1841
0.107464	3.3728
0.107557	1.5618
0.107561	2.0303
0.107598	2.5068
0.107603	3.0443
0.107606	1.2827
0.107617	1.4801
0.107641	1.2755
0.107672	1.347
0.107701	1.445
0.107712	2.1841
0.107856	2.0221
0.107998	1.6301
0.108018	2.1841
0.108056	3.0443
0.108061	3.4417
0.108167	1.9557
0.108234	1.5618
0.108258	2.8785
0.108284	1.7098
0.108301	2.9192
0.108319	2.1841
0.108374	1.0398
0.108492	2.5616
0.108509	2.4744
0.108527	1.4519
0.108615	2.798
0.108708	1.4801
0.108715	2.1943
0.108744	2.2603
0.108905	2.798
0.108911	2.5616
0.108915	1.5618
0.108918	0.8419
0.108939	1.8533
0.108999	2.7579
0.109059	1.8375
0.109092	1.1013
0.109126	1.6301
0.109189	2.798
0.109208	1.78
0.109313	2.5616
0.109313	1.6922
0.109375	2.742
0.109468	2.7441
0.1096	1.5618
0.109616	1.0398
0.109671	1.2889
0.109698	2.5616
0.109741	2.7441
0.109761	1.347
0.109796	1.4801
0.10985	2.9192
0.109966	1.0482
0.110008	2.7441
0.110066	2.5616
0.110107	1.1369
0.11012	2.1943
0.110258	1.6301
0.110269	2.7441
0.110289	1.5618
0.110418	2.5616
0.110434	1.445
0.110519	2.0303
0.110523	2.7441
0.110754	2.5616
0.110772	2.7441
0.110862	1.0398
0.110881	1.4801
0.110932	1.1917
0.110973	1.9557
0.110982	1.5618
0.111013	2.7441
0.111013	1.0815
0.111073	2.4744
0.111074	2.5616
0.111075	1.4519
0.111159	2.2695
0.111248	2.7441
0.111378	2.5616
0.111378	1.8533
0.111395	1.6301
0.111406	2.9192
0.111466	0.8666
0.111475	2.4783
0.111476	2.7441
0.111534	2.1943
0.111563	2.5068
0.111666	2.8495
0.111679	1.5618
0.111697	2.7441
0.111716	1.78
0.111737	3.3728
0.111773	3.4417
0.111864	1.347
0.111864	1.6922
0.111911	2.7441
0.111939	2.8495
0.111963	1.4801
0.112112	1.0398
0.112117	2.7441
0.112197	2.8495
0.112262	1.8375
0.112265	2.7579
0.112316	2.7441
0.112381	1.4274
0.11244	2.8495
0.112461	2.8785
0.112508	2.7441
0.112538	1.6301
0.112631	1.1369
0.112657	1.2827
0.112668	2.8495
0.112691	2.7441
0.11279	1.1917
0.112867	2.7441
0.112882	2.8495
0.112891	1.0482
0.112956	2.1943
0.11297	2.9192
0.113035	2.7441
0.113041	1.4801
0.113081	2.8495
0.113088	1.4274
0.113177	1.2889
0.113194	2.2298
0.113242	1.445
0.113262	2.2603
0.113266	2.8495
0.113345	2.785
0.113365	1.0398
0.113437	2.8495
0.113487	2.785
0.113551	2.0303
0.113595	2.8495
0.113621	2.785
0.113644	1.4519
0.113685	1.6301
0.113701	2.803
0.113738	2.8495
0.113745	2.785
0.113798	1.5584
0.113858	1.9557
0.113861	2.785
0.113869	2.8495
0.113874	1.734
0.113935	2.742
0.113967	2.785
0.113979	1.347
0.113986	2.8495
0.114048	1.7098
0.114064	2.785
0.114069	0.8666
0.11409	2.8495
0.114117	1.4801
0.114151	2.785
0.114182	2.4119
0.114228	2.785
0.114261	2.4119
0.114278	1.8226
0.114296	2.785
0.114327	2.4119
0.114353	2.785
0.114381	2.4119
0.114385	2.5255
0.1144	2.785
0.114424	2.4119
0.114436	2.785
0.114454	2.4119
0.114462	2.785
0.114471	1.6922
0.114473	2.785
0.114477	2.785
0.114481	2.785
0.114514	1.5584
0.11454	2.9192
0.114623	1.0398
0.114666	1.1917
0.114695	1.0815
0.114838	1.6301
0.115189	1.4801
0.115204	2.0221
0.115215	1.1369
0.115234	1.5584
0.115507	2.5068
0.115557	2.2695
0.115557	1.8375
0.115566	2.8493
0.115598	3.4417
0.11563	2.7579
0.115821	2.5255
0.115847	3.3728
0.115885	1.0398
0.1159	1.0482
0.115959	1.5584
0.115995	1.6301
0.116107	1.347
0.116117	2.9192
0.116126	1.445
0.116231	1.4519
0.116258	1.4801
0.116396	2.803
0.116428	1.734
0.116561	1.1917
0.116656	2.0303
0.116685	1.2889
0.116688	1.5584
0.11672	2.8785
0.116727	0.8666
0.116824	2.3741
0.116894	1.8226
0.116919	2.4783
0.117134	1.6922
0.117151	1.0398
0.117159	1.7201
0.117263	2.5255
0.117323	1.4801
0.117423	1.5584
0.117701	2.9192
0.11777	2.2603
0.11786	1.1369
0.117878	1.2827
0.118162	1.5584
0.118247	1.347
0.118327	1.7201
0.118384	1.0559
0.118386	1.4801
0.118422	1.0398
0.118474	1.1917
0.118587	2.742
0.11871	2.5255
0.118835	1.4519
0.118907	1.5584
0.118946	1.889
0.118998	1.0482
0.119039	1.734
0.11909	1.445
0.119096	3.2707
0.119157	3.4315
0.119291	2.9192
0.119428	2.5068
0.119442	0.8666
0.119445	1.4801
0.119501	1.7201
0.119538	3.4417
0.119565	1.8226
0.119656	1.5584
0.119698	1.0398
0.119794	3.3728
0.119826	1.7098
0.119837	2.266
0.119854	1.8505
0.119873	2.1577
0.119934	2.2695
0.120163	2.5255
0.120194	1.2889
0.120399	1.347
0.120406	1.1917
0.120411	1.5584
0.1205	1.4801
0.120567	1.1369
0.120681	1.7201
0.120887	2.9192
0.120979	1.0398
0.121035	2.8785
0.12117	1.5584
0.121454	1.4519
0.121552	1.4801
0.12162	2.5255
0.12171	1.734
0.121866	1.7201
0.121935	1.5584
0.121987	3.4315
0.122076	1.0559
0.122134	1.445
0.122186	1.0482
0.122213	0.8666
0.122265	1.0398
0.122268	2.2603
0.122291	1.8226
0.122355	1.1917
0.122405	2.4783
0.12243	1.889
0.122488	2.9192
0.122563	1.347
0.122601	1.4801
0.122632	1.8505
0.122665	3.2707
0.122706	1.5584
0.122857	2.0221
0.123008	2.1577
0.123056	1.7201
0.12308	2.5255
0.123094	2.266
0.123275	1.2827
0.123326	2.5068
0.123328	2.742
0.123337	1.2565
0.123482	1.5584
0.123556	1.0398
0.123579	3.3728
0.123595	3.4417
0.123646	1.4801
0.123701	1.2889
0.124086	1.4519
0.124095	2.9192
0.124253	1.7201
0.124263	1.5584
0.124292	2.2695
0.124321	1.1917
0.124442	1.734
0.124544	2.5255
0.124687	1.4801
0.124738	1.347
0.124853	1.0398
0.124886	3.4315
0.125042	0.8666
0.12505	1.5584
0.125074	1.8226
0.125262	1.608
0.125407	2.8785
0.125455	1.7201
0.125467	1.0482
0.125468	1.8505
0.125616	1.7098
0.125707	2.9192
0.125725	1.4801
0.125773	1.0559
0.125842	1.5584
0.126009	2.5255
0.126012	1.889
0.126155	1.0398
0.126173	1.2565
0.126231	2.1577
0.126304	1.1917
0.126341	3.2707
0.126429	2.266
0.12664	1.5584
0.126663	1.7201
0.126729	1.4519
0.126757	2.2603
0.126759	1.4801
0.126923	1.347
0.127199	2.5068
0.127203	3.3728
0.127206	1.2889
0.127236	1.734
0.127324	2.7145
0.127444	1.5584
0.127464	1.0398
0.127476	2.5255
0.127771	3.6344
0.12779	1.4139
0.127858	3.4315
0.127878	1.7201
0.127913	1.8226
0.12793	0.8666
0.127933	2.4783
0.128157	2.742
0.128254	1.5584
0.128305	1.1917
0.128363	1.8505
0.128475	1.608
0.128633	2.2695
0.128778	1.0398
0.128817	1.4139
0.128844	1.0482
0.128848	1.2827
0.128943	2.2286
0.128946	2.7145
0.12907	1.5584
0.129074	1.2565
0.129098	1.7201
0.129119	1.347
0.129381	1.4519
0.129473	1.0559
0.129544	2.1577
0.129666	2.8493
0.129693	1.889
0.129837	2.8785
0.12984	1.4139
0.129842	2.266
0.129892	1.5584
0.130092	1.6657
0.130099	1.0398
0.130126	3.2707
0.130321	1.1917
0.130324	1.7201
0.130409	2.5141
0.130571	2.7145
0.130668	3.3728
0.130708	1.2889
0.13072	1.5584
0.130809	1.8226
0.130822	2.0221
0.130859	1.4139
0.130875	0.8666
0.130902	3.7143
0.131048	2.5068
0.131236	2.2603
0.131317	1.8505
0.131324	1.347
0.131418	1.7098
0.131426	1.0398
0.131554	1.5584
0.131557	1.7201
0.131775	1.4327
0.131874	2.5141
0.131875	1.4139
0.13204	1.4519
0.132043	1.2565
0.132068	3.6344
0.132201	2.7145
0.13232	1.0482
0.132354	1.1917
0.132395	1.5584
0.132759	1.0398
0.132795	1.7201
0.132887	1.4139
0.132951	2.1577
0.132957	2.2695
0.133012	1.6657
0.133071	2.742
0.133175	1.0559
0.133242	1.5584
0.133334	1.5752
0.133336	2.5141
0.133475	1.889
0.133503	2.4783
0.133539	1.347
0.133762	1.8226
0.133835	2.7145
0.133881	0.8666
0.133895	1.4139
0.133975	3.3728
0.134022	3.7143
0.134022	3.2707
0.13404	1.7201
0.134085	1.2658
0.134095	1.5584
0.1341	1.0338
0.134204	1.4202
0.134325	2.8785
0.13433	1.8505
0.134403	1.1917
0.134601	1.2827
0.134704	1.4519
0.134795	2.5141
0.13487	2.5068
0.134899	1.4139
0.134955	1.5584
0.135081	1.2565
0.135166	1.4327
0.135292	1.7201
0.135447	1.0338
0.135471	2.7145
0.135706	2.2603
0.135764	1.347
0.135821	1.6927
0.135898	1.0482
0.135899	1.4139
0.135997	1.6657
0.136249	2.5141
0.136452	2.1577
0.136468	1.3304
0.136488	3.6344
0.13655	1.7201
0.136694	1.6927
0.136773	1.8226
0.136802	1.0338
0.136877	1.0559
0.136895	1.4139
0.136906	1.5752
0.136945	0.8666
0.137002	2.3048
0.137111	2.7145
0.137125	3.3728
0.137217	3.7143
0.137231	1.7098
0.137266	2.2695
0.137354	1.2658
0.13736	1.889
0.137369	1.5081
0.137403	1.8505
0.137574	1.6927
0.137695	1.4202
0.137697	2.5141
0.137815	1.7201
0.137887	1.4139
0.137997	1.347
0.138033	3.2707
0.138065	2.742
0.138163	1.0338
0.138189	1.2565
0.138461	1.6927
0.138547	1.3304
0.138648	1.4327
0.138666	2.5068
0.138754	2.7145
0.138871	2.8785
0.138875	1.4139
0.139048	1.6657
0.139086	1.7201
0.139107	2.0221
0.139116	2.4783
0.139139	2.5141
0.139355	1.6927
0.139533	1.0338
0.13958	1.0482
0.139842	1.8226
0.139859	1.4139
0.140034	1.5081
0.140052	2.1577
0.14007	0.9482
0.140121	3.3728
0.140166	2.2603
0.14019	2.3048
0.140238	1.347
0.140256	1.6927
0.140364	1.7201
0.140398	2.7145
0.14049	3.7143
0.140535	1.2827
0.140536	1.8505
0.140558	1.5752
0.140571	2.5141
0.14058	1.0559
0.140641	1.3304
0.140707	1.2658
0.140839	1.4139
0.14091	1.0338
0.141035	3.6344
0.141163	1.6927
0.141178	1.4202
0.14135	1.889
0.141369	1.2565
0.14156	2.2695
0.141648	1.7201
0.141814	1.4139
0.141995	2.5141
0.142045	2.7145
0.142079	1.6927
0.14216	3.2707
0.142166	1.6657
0.142225	1.4327
0.142295	1.0338
0.142435	2.5068
0.142486	1.347
0.142696	1.5081
0.142748	1.3304
0.142786	1.4139
0.14294	1.7201
0.142964	3.3728
0.142969	1.8448
0.143001	1.6927
0.143055	1.7098
0.143138	2.742
0.143255	0.9482
0.143349	2.8493
0.143369	1.0482
0.143408	2.5141
0.143459	2.3048
0.143478	3.1434
0.143688	1.0338
0.143694	2.7145
0.143729	1.8505
0.143751	2.1577
0.143753	1.4139
0.143842	3.7143
0.143931	1.6927
0.144147	1.2658
0.144239	1.7201
0.144283	1.0559
0.144292	1.5752
0.144616	2.2603
0.144621	1.2565
0.144652	1.4202
0.144716	1.4922
0.144743	1.3052
0.14477	2.4783
0.144808	2.5141
0.144868	1.6927
[truncated: 11,092 more rows]

## Sheet: Fig3L
All points			Averages
Curvature (1/um)	Intensity (a.u.)		AVEcurvature (1/um)	AVEintensity (a.u.)	STDcurvature (1/um)	STDintensity (a.u.)
1.13335e-16	1.84177		0.03825	1.37149	0.028572	0.261664
2.10633e-16	1.15489		0.140755	1.46163	0.027994	0.172108
9.60496e-07	1.39203		0.248515	1.41486	0.02849	0.177742
4.91394e-06	1.50873		0.349677	1.41211	0.029071	0.178972
5.9123e-06	1.49393		0.445416	1.41156	0.028855	0.194265
7.87706e-06	1.57947		0.543662	1.3396	0.028754	0.271552
1.76496e-05	1.20885		0.649625	1.4313	0.029187	0.246246
3.03572e-05	1.21631		0.75267	1.50491	0.02756	0.293984
3.79499e-05	1.18557		0.844778	1.44844	0.028429	0.413658
4.65664e-05	1.15489		0.948105	1.48072	0.028437	0.160239
4.94219e-05	1.39203		1.0406	1.39836	0.027068	0.150661
5.04789e-05	1.39172		1.15415	1.34856	0.02894	0.121425
5.36098e-05	1.20339		1.25158	1.2314	0.029095	0.273597
5.66777e-05	0.80451		1.33623	1.33372	0.02992	0.282258
5.69529e-05	1.59112		1.44443	1.58616	0.009478	0
5.91825e-05	1.57929
6.38513e-05	1.86201
6.59918e-05	1.53664
7.58596e-05	1.65162
8.89136e-05	1.50126
9.20551e-05	1.20885
9.49755e-05	1.17491
9.50456e-05	1.37203
0.000100062	1.57947
0.000102822	1.34144
0.000105043	1.39172
0.000113921	1.57947
0.00011466	1.59036
0.000121822	1.20339
0.000135587	1.37121
0.000137966	1.37203
0.000142374	1.68614
0.000142786	1.38748
0.000145288	1.17491
0.000151597	1.46891
0.000152729	1.38748
0.000153525	1.6349
0.000162885	1.39511
0.000169707	1.22758
0.000178313	1.37884
0.000187082	1.20339
0.000197566	1.17327
0.000202382	1.49393
0.000205246	1.30385
0.000209978	1.57947
0.000210973	1.18557
0.000212788	1.49393
0.000216208	1.37884
0.000218148	1.57947
0.000220129	1.59112
0.000221828	1.46757
0.000224163	1.39511
0.000224372	1.47907
0.000249484	1.22203
0.000250708	1.22758
0.00025177	1.39102
0.000251874	1.12089
0.00026481	1.06794
0.000267244	0.987958
0.000278968	1.65162
0.000284762	1.17945
0.000285111	1.39102
0.000285149	1.6349
0.000285189	1.47477
0.000289046	1.40427
0.000293242	1.59036
0.000293489	1.56969
0.000293614	1.60801
0.000308279	1.12531
0.000309121	1.22203
0.000315191	1.4621
0.00031634	1.41407
0.000318809	1.53092
0.000320243	1.57929
0.000320635	1.56294
0.000321956	1.57947
0.000332399	1.57224
0.000335164	1.22758
0.000337168	1.4621
0.000339324	1.37634
0.00034079	1.37121
0.000345559	1.41407
0.000357705	1.40427
0.000366083	1.23684
0.000366848	1.14048
0.000370978	1.59335
0.000372866	1.45244
0.000387106	1.57135
0.000398357	1.45244
0.000408294	0.804346
0.000412025	1.52631
0.000418177	1.49393
0.000420455	1.23684
0.000421455	1.56294
0.000422121	1.44183
0.00042318	1.24359
0.000426021	1.38748
0.000427652	1.14048
0.000430323	1.40427
0.000436084	1.57947
0.000444244	1.44183
0.0004577	1.49314
0.000457932	1.57156
0.000458799	1.58107
0.000459013	1.56625
0.000460499	1.41008
0.000460507	1.61658
0.000461564	0.775486
0.000462037	1.18557
0.000464807	1.40093
0.000466773	1.21631
0.000472325	1.26476
0.00048389	1.35533
0.000490764	1.1444
0.000491771	0.80451
0.000494076	1.26522
0.00049535	1.56736
0.000497857	1.2145
0.000497866	1.13456
0.000498801	1.59112
0.000501566	1.35533
0.000507086	1.44786
0.000514866	1.24359
0.000517908	1.31448
0.000518717	1.26522
0.000520678	1.56294
0.000521775	1.26476
0.000525335	1.84177
0.000527808	1.37634
0.000529494	1.17945
0.000532134	1.46891
0.000532983	1.31448
0.000544167	1.28642
0.000546856	1.32223
0.000548716	1.53706
0.000552455	1.57947
0.000556258	1.1444
0.000559589	1.32559
0.000568887	1.26476
0.00057045	1.30107
0.000571241	1.32559
0.000580205	1.6477
0.000580967	1.37433
0.000581869	1.32235
0.00058813	1.46757
0.000588192	1.44786
0.000591526	1.32235
0.000597591	1.30107
0.000600263	1.28926
0.000606163	1.57224
0.000608129	1.2951
0.000610333	1.25218
0.000613739	1.30261
0.000617045	1.61658
0.000618262	1.628
0.000618373	1.56294
0.000621768	1.20461
0.000622015	1.50652
0.000622587	1.6349
0.000622948	1.52631
0.000624212	1.15336
0.000625614	1.31107
0.00064286	1.71283
0.000647201	0.799868
0.000654546	1.24762
0.000656409	1.30261
0.000671163	1.59913
0.000673844	1.42541
0.000680971	1.57929
0.000684413	1.257
0.000688277	1.53259
0.000694704	1.15336
0.000694895	1.6349
0.000695009	1.50873
0.000696971	1.31699
0.000696989	1.38748
0.000703779	1.54056
0.00070898	1.11298
0.000709693	1.25218
0.000714606	1.56294
0.000715242	1.26603
0.000715274	1.18557
0.000725726	1.60986
0.00073464	0.922889
0.000735499	1.20852
0.000743971	1.6477
0.000747061	1.26603
0.000757828	1.49314
0.000763418	1.61658
0.000764253	1.42541
0.000767816	1.15336
0.000772063	1.21346
0.000772176	1.17945
0.000779017	1.59112
0.000779897	1.27751
0.000780461	1.41008
0.000792308	1.59913
0.000806732	1.21346
0.000809441	1.56294
0.000813062	1.25218
0.000813781	1.28484
0.000824236	1.50652
0.000835079	1.52631
0.000839574	1.22366
0.000843632	1.10994
0.000848741	1.28484
0.000849706	1.37121
0.000852067	1.11298
0.000859642	1.42043
0.000870654	1.22366
0.000876639	1.57156
0.000878202	1.57224
0.000884809	1.29369
0.000897165	1.59335
0.0008985	0.80451
0.000900034	1.23093
0.000900159	1.58024
0.000902939	1.56294
0.000904722	0.804346
0.000919766	1.46891
0.000920556	1.2395
0.000922015	1.29369
0.00092224	1.10994
0.000927777	1.23093
0.000933162	1.60801
0.000937041	1.20671
0.000947302	1.46757
0.000947885	1.49873
0.000953941	1.23879
0.000955738	1.38748
0.000960238	1.42043
0.000960393	1.30596
0.000960816	1.45297
0.000964621	1.86201
0.000970714	1.18557
0.000970849	1.60986
0.000978457	0.775486
0.000978586	1.23879
0.00098517	1.56969
0.000993278	1.57327
0.000994894	1.22163
0.00099516	1.54588
0.000996841	1.37433
0.000996995	1.4621
0.000999973	1.26459
0.00100177	1.23324
0.00100373	1.1281
0.00101284	1.17945
0.00101891	1.13456
0.00102354	1.23324
0.00102362	1.59108
0.00102478	1.50652
0.00102778	1.65175
0.00103229	1.30487
0.00104079	1.27853
0.00104395	1.22866
0.00104834	1.52631
0.0010524	1.53664
0.00105891	1.84177
0.00106073	1.59112
0.00106279	1.59913
0.00106306	1.22866
0.00106628	1.42043
0.00107712	1.61864
0.00108091	1.24412
0.00108288	1.28309
0.00108616	1.54588
0.00108819	1.1281
0.00109744	1.49873
0.00109755	1.24412
0.00111251	1.41008
0.00111304	1.26904
0.00112354	1.62803
0.00112627	1.28309
0.0011274	1.26904
0.00113046	1.71283
0.0011407	1.29902
0.00114218	1.86201
0.00114675	1.65175
0.00114839	1.30487
0.00115296	1.29902
0.00115424	1.53664
0.00115554	1.02772
0.00116423	1.31903
0.00116615	1.37634
0.00117101	1.28476
0.00117455	1.19946
0.00117571	1.14763
0.001176	1.54588
0.00117801	1.42075
0.00118396	1.21076
0.0011925	1.21076
0.00119454	0.987958
0.00119927	1.20461
0.00120019	1.19759
0.00120235	1.38748
0.00120708	1.19759
0.0012132	1.18259
0.00121588	1.05937
0.00121712	1.28476
0.00121858	1.15785
0.00121972	1.05937
0.00122325	1.07001
0.00122325	1.15785
0.00122358	1.50652
0.00122646	1.07982
0.00122724	1.13652
0.00122839	1.18109
0.00122933	1.07982
0.00123058	1.13652
0.00123151	1.60986
0.00123186	1.0841
0.00123331	1.11438
0.00123401	1.08806
0.00123543	1.10693
0.00123577	1.08806
0.00123699	1.10693
0.00123712	1.10387
0.00123801	1.11074
0.00123804	1.13731
0.00123851	1.11074
0.00123851	1.1289
0.0012515	1.17945
0.00125755	1.60317
0.00126267	1.49011
0.00126423	1.53092
0.00126465	1.28889
0.00126473	1.54588
0.0012664	1.14763
0.00126898	1.30324
0.00127831	0.79048
0.00129569	1.42075
0.00129934	1.46757
0.00131364	1.28889
0.00131447	1.46891
0.00131594	1.57156
0.00133856	1.59913
0.00134389	1.59112
0.00134879	1.59108
0.0013524	1.54588
0.00136035	1.15965
0.0013606	1.60317
0.00136411	1.30206
0.00138245	1.50873
0.00138465	1.37433
0.00138501	1.53259
0.00138552	1.56625
0.00139275	1.38976
0.00139418	1.30324
0.00139803	1.47907
0.00141612	1.30206
0.00141959	1.41679
0.00142058	1.50652
0.00143319	1.61716
0.00143425	0.804346
0.00143614	1.59335
0.00143664	1.37634
0.00143693	1.38748
0.00143906	1.54588
0.00144624	0.826163
0.00145632	1.61894
0.00145649	1.42875
0.00145766	1.15965
0.0014697	1.27249
0.00147798	1.49011
0.00147972	1.29452
0.00148547	0.8939
0.00148821	1.17945
0.00148834	1.18109
0.00150652	1.29452
0.00150855	1.68645
0.00151134	1.60801
0.00152411	1.30754
0.00152477	1.54588
0.00152489	1.27249
0.0015338	1.32587
0.0015451	1.61894
0.00154997	1.46839
0.00155541	1.23791
0.00155649	1.45297
0.00155845	1.19448
0.00156158	1.32587
0.00157452	1.56969
0.00158174	1.2843
0.00158985	1.32587
0.00160082	1.84177
0.00160519	1.71283
0.00160957	1.59717
0.00161572	1.50652
0.00161863	1.35637
0.00161969	1.59913
0.00162732	1.61894
0.00162844	1.59112
0.00163259	0.79048
0.00164029	1.2843
0.00164361	1.53706
0.00164425	1.46757
0.00164791	1.35496
0.00165326	1.49314
0.00165709	1.59108
0.00165795	1.62803
0.0016589	1.30754
0.00165963	1.38638
0.00166282	1.19448
0.00166594	0.987958
0.0016777	1.39044
0.00168713	1.46839
0.00169351	1.56822
0.0016942	1.49011
0.00170058	1.29387
0.00170194	1.55484
0.00170333	1.56571
0.00170801	1.39044
0.00170897	1.42598
0.00171041	1.06794
0.00171622	1.46891
0.00172298	1.16743
0.00173884	1.35515
0.0017444	0.826163
0.00174578	1.37433
0.00175058	1.18109
0.00176265	1.31526
0.00176441	1.61716
0.00177019	1.38933
0.00177088	1.16643
0.00177347	1.62256
0.00177649	1.57156
0.00177663	1.56822
0.00179867	1.30754
0.00180207	1.38933
0.00180283	1.60019
0.00180619	1.54056
0.00180894	1.50652
0.00181222	1.42875
0.0018196	1.34144
0.00182655	1.31526
0.0018304	1.6477
0.00183135	1.45517
0.00183448	1.38933
0.00183806	1.58334
0.0018452	1.47907
0.00185898	1.56822
0.00186743	1.39434
0.00186827	0.781527
0.0018706	1.38638
0.00188275	1.16643
0.00189233	1.32753
0.0018974	1.58334
0.00190091	1.39434
0.00190624	1.59913
0.00190785	1.64441
0.00191125	1.49011
0.00191435	1.54581
0.00193493	1.42009
0.00193778	1.70123
0.00194002	0.775486
0.0019406	1.56822
0.00194356	1.31532
0.00194451	1.8175
0.0019447	1.628
0.00194911	1.59108
0.00195179	1.62743
0.00195403	1.37634
0.00195584	1.16743
0.00196003	1.32753
0.00196266	0.79048
0.00196948	1.42009
0.00197157	1.38976
0.00198204	1.43856
0.00198293	1.45517
0.00198784	1.59335
0.00199307	1.49314
0.00199846	1.12653
0.00199854	1.16643
0.0019986	0.797616
0.00200019	1.50652
0.0020015	1.59314
0.00200458	1.36502
0.00201037	0.849012
0.00201517	1.18109
0.00202153	1.56822
0.00202967	0.781527
0.00202971	1.32753
0.00204022	1.38873
0.00204678	1.59314
0.00205991	1.48841
0.00206704	1.71283
0.00206766	1.50873
0.00207004	1.38638
0.00207205	1.61716
0.0020764	1.38873
0.00208157	1.38088
0.00208573	1.53259
0.00208789	1.61992
0.0020937	1.31532
0.00210139	1.33751
0.00210182	1.56822
0.00210845	1.49888
0.00211311	1.38873
0.00211527	1.60019
0.00211838	1.1846
0.00212494	1.45297
0.00212499	1.46656
0.00212506	1.61992
0.00212904	0.799868
0.00212905	1.49011
0.00213531	1.53092
0.00213625	1.30831
0.00214221	1.45517
0.00214399	1.6477
0.00214975	1.23791
0.00215036	1.35958
0.00215115	1.84177
0.00215161	1.11298
0.00215825	1.51054
0.00215851	1.58001
0.00216154	1.34144
0.00216865	1.60801
0.00217515	1.2772
0.00217945	1.42875
0.00218149	1.56822
0.00218682	1.16743
0.00218814	1.35958
0.00218846	1.58001
0.00218942	1.50567
0.00219829	1.55079
0.00220052	0.781527
0.00220098	1.53664
0.00220155	1.54581
0.00220937	1.5214
0.00221242	1.52476
0.0022151	1.60653
0.00222439	1.30831
0.00222541	1.59851
0.00222645	1.35958
0.00222741	1.62803
0.00223862	1.60653
0.0022424	1.1846
0.00224921	1.31532
0.00225101	1.29288
0.00225241	1.20921
0.00225815	1.38638
0.00225892	1.55904
0.00225921	1.54095
0.0022606	1.55026
0.0022616	1.54648
0.00226182	1.52144
0.00226528	1.383
0.00226979	0.773117
0.00227162	1.86201
0.00227703	1.57823
0.00228212	1.18109
0.00229382	1.20921
0.00230462	1.34638
0.00230948	1.43494
0.00231272	1.43856
0.00231565	1.53004
0.00231597	1.30811
0.00232523	2.05188
0.00232904	1.29288
0.00233603	1.23914
0.00233918	1.55026
0.00234448	1.34638
0.00234753	1.49011
0.00234799	1.5831
0.00235732	1.6266
0.00237071	1.20712
0.00237088	1.53004
0.00237658	1.50567
0.00237904	1.2148
0.00238097	0.775486
0.00238131	0.783593
0.00238483	1.36967
0.0023886	1.37634
0.00239332	1.38088
0.00240928	1.29997
0.00241022	1.32112
0.00241113	1.32853
0.00241594	1.16743
0.00241726	1.55026
0.00242288	1.2338
0.00242568	1.36967
0.00242756	1.53513
0.00243517	1.38638
0.00244684	1.60019
0.00245185	1.42598
0.002467	1.36967
0.00246754	1.2338
0.00247422	1.20461
0.0024851	1.43494
0.00248571	1.53127
0.00248657	1.59851
0.00249	1.57698
0.00249179	1.29997
0.00249489	1.55026
0.0024959	1.55079
0.00250078	1.58107
0.00250345	1.20712
0.00250879	1.33254
0.00251	1.32853
0.00251305	1.25002
0.00251565	1.84177
0.00251606	1.71283
0.00253912	1.11298
0.00254073	1.46656
0.00254538	1.62727
0.00254998	1.13456
0.00255041	1.02772
0.00255103	1.35539
0.00255148	1.18109
0.00255219	1.61132
0.00255518	0.773117
0.00255789	1.42875
0.00255942	1.26838
0.00255962	1.44027
0.00256161	1.50567
0.0025666	1.49011
0.0025721	1.55026
0.00257258	0.783593
0.00257661	1.3124
0.00257687	1.32112
0.00258784	1.38976
0.0025937	1.35539
0.00259955	0.797616
0.00260134	1.38638
0.00260593	1.65665
0.0026066	1.61229
0.00260667	1.27058
0.00261274	1.33613
0.00262138	1.6266
0.00263631	1.43856
0.00263678	1.35539
0.00263777	1.44357
0.00264077	1.22423
0.00264324	1.16743
0.00264892	1.55026
0.00265481	1.27058
0.0026638	1.3124
0.00266691	1.45297
0.0026694	1.43494
0.0026694	1.61229
0.00266967	1.59308
0.00268027	1.35252
0.00268225	1.38088
0.00270385	1.27062
0.00270431	1.41366
0.00271001	1.84177
0.00271852	1.44391
0.0027195	1.34386
0.0027197	1.60801
0.00272074	0.987958
0.00272412	1.35252
0.00272538	1.55026
0.00273315	1.59851
0.00273383	1.59604
0.00273516	1.58487
0.00274446	1.50567
0.00274929	1.32112
0.00275108	1.59533
0.0027534	1.33827
0.00275381	1.27869
0.00275693	1.38638
0.00276389	1.55904
0.00276833	1.35252
0.00277488	0.783593
0.00277941	1.25337
0.00277964	1.57698
0.00278279	1.22423
0.00278618	1.49011
0.0027909	1.53259
0.00279853	1.66689
0.00279915	1.55799
0.00279991	1.56432
0.00280153	1.55195
0.00280196	1.44213
0.00280244	1.57074
0.0028047	1.27869
0.00281286	1.36275
0.00282	0.773117
0.00282328	1.1892
0.00282862	1.49314
0.00283042	1.36017
0.00283356	1.62792
0.00284482	1.54516
0.00284547	1.33827
0.00285653	1.28961
0.00285768	1.36275
0.00285805	1.56969
0.00286273	1.42283
0.00286536	1.6266
0.00286744	1.47477
0.00286769	1.52459
0.00286873	1.16743
0.00287158	1.5669
0.00287711	1.8175
0.00287739	1.55195
0.00288818	1.42172
0.00290219	1.36991
0.00290276	1.3459
0.00290933	1.2505
0.0029251	1.50567
0.0029276	1.31811
0.00292966	1.22423
0.00293505	1.53092
0.0029372	1.52459
0.00294007	1.36484
0.00294262	1.55692
0.00294569	1.36017
0.0029472	1.42875
0.00294807	1.3459
0.00294956	1.38403
0.00295228	1.71332
0.00295282	1.43856
0.002953	1.55195
0.00296311	1.2505
0.0029634	1.46656
0.00296567	1.59984
0.00296991	0.922889
0.00297729	1.42172
0.00298878	0.796926
0.00298969	1.2101
0.00299084	1.54056
0.00299357	1.35743
0.00300292	0.967218
0.00300619	1.46607
0.00300848	1.49731
0.00300857	1.66827
0.00301563	1.55692
0.00301787	1.25731
0.00302217	1.47907
0.00302838	1.55195
0.00303724	1.36484
0.00303743	1.36991
0.00303922	1.35743
0.00305658	1.49489
0.00306545	1.42283
0.00306546	1.37544
0.00306937	1.57135
0.00306938	1.41292
0.00307042	1.57698
0.00307364	1.26301
0.00308065	1.49873
0.00308152	1.24943
0.00308155	1.48922
0.00308498	1.35743
0.00309032	1.6266
0.00309064	1.55664
0.00309245	1.15544
0.00309755	1.1892
0.00310348	1.50567
0.00310357	1.55195
0.00310811	1.55799
0.00310958	1.63842
0.00311193	1.31811
0.0031246	1.628
0.00312909	1.61132
0.00313043	1.26301
0.00313079	1.33644
0.00313703	1.36484
0.00315647	1.48922
0.00316294	1.36991
0.00316457	1.40428
0.00316773	1.56393
0.00317139	1.62446
0.00317662	1.34993
0.00317861	1.55195
0.003181	1.06794
0.00318313	1.45297
0.00318443	1.56625
0.00318468	1.59984
0.00318826	1.28972
0.00318991	1.32727
0.00319639	1.38403
0.00321302	1.63412
0.00321489	0.796926
0.0032224	1.34993
0.00322633	1.44623
0.00322655	1.46607
0.00323326	1.48814
0.00323853	1.19104
0.00323896	0.797616
0.0032395	1.31331
0.00324062	1.52476
0.00324331	1.38976
0.00324696	1.56896
0.00324713	1.30365
0.00324775	1.49314
0.00325351	1.55195
0.00326228	1.43856
0.00326296	1.42298
0.00326807	1.34993
0.0032775	1.84177
0.00327794	1.42283
0.00327901	1.3978
0.00327955	1.50567
0.00329206	1.55904
0.0032973	1.59902
0.00330242	1.31811
0.00330706	1.30365
0.00331196	1.50137
0.00331358	1.34993
0.00331441	1.15544
0.00331922	1.32727
0.0033203	1.69408
0.00332831	1.55052
0.00332837	1.5406
0.00334471	1.31331
0.00334699	1.48412
0.00335886	1.33789
0.00336229	1.57698
0.00336467	1.42099
0.00336807	1.33393
0.00337434	1.1892
0.00337576	1.71332
0.00337975	1.53664
0.00338515	1.37634
0.00338596	1.3978
0.00339068	1.59984
0.00339259	1.5029
0.00339296	1.46656
0.00340085	1.19388
0.00340304	1.55052
0.00340384	1.33482
0.00341163	1.58107
0.00341205	1.5406
0.00341249	1.60801
0.00341829	1.38094
0.00342284	1.55799
0.00342373	1.46914
0.00342384	1.33197
0.00343016	1.34082
0.00343157	1.61289
0.00343314	1.57584
0.00344592	1.25337
0.00344718	1.46607
0.00344843	1.33482
0.0034527	1.31353
0.00345327	1.50567
0.0034534	1.86201
0.00345359	1.35832
0.00345385	0.810314
0.00345785	0.779074
0.00346187	0.799868
0.00346463	1.47907
0.00346867	0.844584
0.00346982	1.43446
0.0034752	1.5029
0.00347773	1.55052
0.00347811	1.62792
0.00348104	1.12653
0.00348302	1.13319
0.00348409	1.3978
0.00348729	1.59902
0.00349257	1.33482
0.00349336	1.34082
0.00349804	1.5294
0.0034992	1.33547
0.00350057	1.40833
0.00350099	1.55604
0.00350174	0.776084
0.00353465	1.15544
0.00353594	1.54648
0.00353617	1.3392
0.00354699	1.61289
0.00355065	1.84457
0.00355241	1.55052
0.00355251	0.826193
0.00355768	1.34816
0.00355981	1.49673
0.00356353	1.31353
0.00356471	1.42958
0.00356655	1.62446
0.00356862	1.19388
0.00357373	1.38305
0.00357853	1.43446
0.00357913	1.3392
0.00358419	1.58965
0.00358642	1.53812
0.00359321	1.37047
0.00359865	1.84457
0.00360051	1.57135
0.00361321	1.34144
0.00362136	1.33585
0.00362161	1.6477
0.00362313	1.27683
0.00362461	1.52889
0.0036271	1.60904
0.00363294	1.34625
0.00363849	0.81915
0.00364645	1.499
0.00364685	1.91429
0.00365367	1.1892
0.00365518	1.38305
0.0036552	1.57698
0.0036612	1.59902
0.00366276	1.33585
0.00366655	1.53092
0.00366673	1.50799
0.00366798	1.46607
0.00367435	1.43609
0.00367724	1.32271
0.00367724	1.53812
0.0036896	0.938541
0.00368971	1.28883
0.00369092	1.43728
0.00369476	0.776084
0.00369523	1.9988
0.00370183	1.60904
0.00370239	1.33547
0.00370322	1.35064
0.00370631	0.810314
0.00371842	1.61132
0.00372666	0.81915
0.00372877	1.38305
0.00373071	1.53706
0.00373373	1.46596
0.00373514	1.499
0.00373828	1.37047
0.00374201	1.19388
0.00374263	1.35064
0.00374342	1.55799
0.00374375	1.89475
0.00374687	0.769753
0.00375319	1.15544
0.00375682	1.48412
0.00375746	1.3102
0.00376373	1.8175
0.00376569	1.58965
0.00377059	1.54671
0.00377664	1.60904
0.00378086	1.35064
0.00378656	1.71332
0.00379095	1.50799
0.00379236	1.89475
0.00379353	1.52889
0.0037939	1.32271
0.00379481	1.38305
0.00380714	1.43694
0.00381708	0.815674
0.00381779	1.35064
0.00381996	1.59902
0.0038247	1.34625
0.00382592	1.51123
0.00382637	1.3102
0.00382934	1.46656
0.00384103	1.73216
0.00384407	1.55904
0.00385155	1.59744
0.00385329	1.35064
0.00385361	1.38305
0.00385371	1.84177
0.00386016	1.42958
0.00386653	1.56421
0.00387221	0.776084
0.00388721	1.36822
0.00388888	1.46607
0.00388902	1.39758
0.00388969	1.71276
0.00389646	1.32557
0.00390549	1.39406
0.00390982	0.7989
0.00391211	1.33547
0.00391354	1.32271
0.00391836	1.60801
0.00391877	0.801697
0.0039188	1.51123
0.00391941	1.36822
0.00391956	1.12955
0.00391986	1.41746
0.00392119	1.20623
0.00392659	1.59744
0.00392731	1.44044
0.0039356	1.1892
0.00393566	1.58965
0.00393831	1.71276
0.00393974	1.38821
0.00394908	1.57698
0.00394973	1.36822
0.00395076	1.38334
0.00395999	1.52889
0.00396441	1.59528
0.00396514	1.59079
0.00396773	1.32557
0.00397005	1.15544
0.00397297	0.810314
0.00397783	1.46596
0.00397801	1.36822
0.00398358	1.49314
0.00398514	1.6682
0.00398682	1.6734
0.00398971	1.38334
0.00400009	1.34625
0.00400178	1.59744
0.00400408	1.37764
0.00400492	0.7989
0.00401381	1.52066
0.00402266	1.38334
0.00402776	1.37764
0.00403311	1.44623
0.00403517	1.71174
0.00403623	1.33566
0.00404021	1.33726
0.00404565	1.41642
0.00404887	1.35719
0.00404988	1.38334
0.00405158	1.44948
0.00405362	1.41746
0.00406648	1.59079
0.00406721	1.35719
0.00406992	1.55799
0.00407167	1.38334
0.00407715	1.59744
0.00408257	1.35719
0.00408329	1.69561
0.00408831	1.38334
0.00409344	1.13456
0.00409456	1.58454
0.00409476	1.35719
0.00409537	1.59528
0.00409722	1.38094
0.00410008	1.35789
0.00410245	0.794388
0.00410355	1.38367
0.00410633	1.20623
0.00410723	1.38367
0.00410872	1.38367
0.00410979	1.46607
0.00411002	1.38367
0.00411095	1.51223
0.00411391	1.35816
0.00411425	1.57584
0.00411677	1.66827
0.00412397	1.52889
0.0041285	1.34286
0.00413111	1.69561
0.00414129	1.43609
0.00414424	1.56969
0.00414864	1.42958
0.00415082	1.24931
0.00415273	1.59744
0.00416001	1.34962
0.00416201	1.33566
0.00416277	1.61698
0.00417063	1.52103
0.00417619	1.48412
0.00417856	1.67048
0.00418009	1.44948
0.00418477	1.71332
0.00418526	1.15544
0.00418882	1.35816
0.00419245	1.41905
0.00420247	0.794388
0.00420838	1.41642
0.00421024	1.51223
0.00421362	1.59528
0.00421646	1.55604
0.00422014	1.1892
0.00422556	1.72587
0.00422855	1.59744
0.00423325	1.43817
0.00423899	1.52476
0.00424285	1.58454
0.00424388	1.57698
0.00425455	0.826237
0.00425988	1.54056
0.00426496	1.38563
0.00427202	1.69321
0.00427249	1.46515
0.00427767	1.50822
0.0042796	0.967218
0.00428011	1.5831
0.00428542	1.52889
0.00429093	1.36296
0.00429525	1.57224
0.00429761	1.22582
0.00430464	1.59744
0.00430505	0.791385
0.00430533	1.34962
0.0043117	1.51883
0.00431264	0.987958
0.004313	1.4544
0.00431785	1.69321
0.0043199	1.56432
0.00432006	1.61132
0.00432227	1.43046
0.00433063	1.46607
0.00433295	1.53257
0.00433654	1.36043
0.00434235	1.38563
0.00435167	1.34286
0.0043589	1.20461
0.00436018	1.11753
0.00436296	1.69321
0.00436443	1.34144
0.00437747	1.43515
0.00438093	1.63234
0.00438097	1.58454
0.00438101	1.58505
0.00438768	1.50822
0.00439883	1.13635
0.00440241	1.55799
0.00440723	1.63118
0.00441024	0.78966
0.00441492	1.58966
0.00441531	1.51883
0.00442057	1.56292
0.00442091	1.43046
0.00442098	1.41511
0.00442304	1.36296
0.00442777	1.39524
0.00442837	1.6682
0.00443021	1.42958
0.0044369	1.34962
0.00443873	1.77084
0.00444432	1.52889
0.00445047	1.45466
0.00445057	1.66082
0.0044577	1.58505
0.00447018	1.38564
0.00448611	1.36043
0.00449284	1.61092
0.00449307	1.3178
0.00449519	1.22582
0.00449936	1.58966
0.00450041	1.43817
0.00450073	1.49876
0.00450086	1.41511
0.00450736	1.19258
0.00450933	1.57286
0.00451812	0.78966
0.00452108	1.53694
0.00452158	1.49314
0.00452185	1.44138
0.00453392	1.61092
0.00453474	1.58505
0.00453955	1.57698
0.00454252	1.3178
0.0045513	1.46607
0.00455181	0.826237
0.00455314	1.43515
0.00455551	1.35584
0.00455838	1.36296
0.00456119	1.25526
0.00456387	1.628
0.00457046	1.71607
0.00457368	1.61092
0.00457385	1.58966
0.00458174	1.34286
0.00458201	1.4265
0.0045847	1.43609
0.00458866	1.48892
0.00459133	1.30665
0.00459265	1.45664
0.00460064	1.52889
0.00460456	1.48412
0.00460566	1.8175
0.00460906	1.30385
0.0046108	1.13635
0.00461198	1.58454
0.00461214	1.58505
0.00461692	1.49883
0.00462517	1.44138
0.00462836	1.57286
0.00462875	0.793309
0.00462901	1.53694
0.00463899	1.59671
0.0046394	1.30665
0.00464097	0.787549
0.00464139	1.35238
0.00464825	1.47907
0.00464865	1.58454
0.00465396	1.19564
0.0046619	1.35584
0.00466435	1.57972
0.00466443	1.48042
0.00467627	1.06794
0.00467897	1.38821
0.00468028	0.826163
0.00468354	1.55001
0.00468664	1.28594
0.00468871	1.86201
0.00468995	1.58505
0.00469537	1.59671
0.00469701	1.35775
0.00469927	1.22582
0.0047049	1.39839
0.00471001	1.13319
0.00471647	1.55001
0.00472234	1.46515
0.00472495	0.849012
0.0047309	1.44138
0.00473292	1.28594
0.00473566	1.44036
0.00473631	1.49883
0.00473844	1.57286
0.00473906	1.58593
0.00473972	1.45664
0.00474096	1.55799
0.0047422	0.793309
0.00474237	1.38094
0.00474353	1.56154
0.00474725	1.55001
0.00474811	1.48042
0.00474853	1.19564
0.00475025	1.2101
0.00475436	1.49317
0.00475681	1.35584
0.00476229	0.890954
0.00476818	1.58505
0.00477174	1.45087
0.0047724	1.32011
0.0047757	1.55211
0.00477813	1.28464
0.00477974	1.43817
0.004784	1.56154
0.00479484	1.57584
0.00479727	1.19258
0.00480159	1.55211
0.00480261	1.35238
0.00480834	1.54648
0.00481726	1.59455
0.00481883	1.3644
0.00482118	1.13635
0.00482212	1.33974
0.00482471	1.55211
0.00483307	1.51428
0.00483602	1.57698
0.00483896	1.30686
0.00483912	1.45215
0.00483998	1.56048
0.00484091	1.35991
0.00484378	1.59455
0.00484483	1.5432
0.00484492	1.16607
0.00484686	1.58505
0.00485124	1.64823
0.00485853	0.800963
0.00485901	1.49722
0.00486168	1.5432
0.004864	1.59455
0.00486477	1.33925
0.00486552	0.826237
0.00486617	0.799868
0.00487287	1.44623
0.00487501	1.5588
0.00487834	1.58156
0.00488454	1.5588
0.00488721	1.55597
0.00488932	1.61698
0.00488996	1.5588
0.00489096	1.55597
0.00489186	1.44933
0.0048932	0.826163
0.00489572	1.25756
0.00489752	1.6682
0.00490544	1.49317
0.00490593	1.33925
0.00491003	1.24818
0.00491401	1.06752
0.00491486	1.35991
0.00491931	1.51428
0.00492528	1.46055
0.00492603	1.59865
0.00493094	1.49489
0.00493333	1.56048
0.00493384	1.61164
0.00493665	1.56625
0.00493748	1.53257
0.00493779	1.55604
0.00494314	1.14468
0.00494374	1.71607
0.00494387	1.12653
0.00494478	1.30385
0.00494544	1.35678
0.00494987	1.45215
0.0049501	1.42416
0.00496549	1.64823
0.00497	1.35238
0.00497277	1.39839
0.00497409	1.40423
0.00497783	0.800963
0.00497928	1.35991
0.00498313	1.35678
0.00498428	1.31378
0.00498508	1.49453
0.00498833	0.890954
0.00498967	1.84177
0.00499184	1.45087
0.00500529	1.46935
0.0050057	1.59865
0.00500683	1.55069
0.00501492	1.40423
0.00501604	0.779074
0.00501882	1.36808
0.00501888	1.56048
0.00502222	1.56292
0.00503	1.13635
0.00503267	1.77084
0.00503475	1.37009
0.00504133	1.48412
0.00504322	1.14468
0.00504923	1.44376
0.00505063	1.70302
0.00505233	1.36808
0.00505388	1.49317
0.00505505	1.42827
0.00506305	1.3644
0.00506322	1.45215
0.00507164	1.42133
0.00507704	0.769753
0.0050818	1.70293
0.00508183	1.37009
0.00508285	1.50178
0.00508344	1.36147
0.00508565	1.55799
0.00508591	1.59865
0.00508993	1.19258
0.00509441	1.42827
0.00509563	1.55069
0.00509696	1.55605
0.00510017	0.804109
0.00510701	1.64022
0.00511196	1.36147
0.00511463	1.49453
0.00511792	1.49314
0.00512106	1.37009
0.00512228	1.46055
0.00512767	1.24818
0.00513293	1.4155
0.00513301	1.31378
0.00513325	1.57698
0.00513764	1.34585
0.00514382	1.36781
0.00514517	1.12256
0.00515294	1.3712
0.00515711	1.67319
0.00516026	1.34585
0.00516636	1.74408
0.00516668	1.59865
0.00516791	1.55605
0.00517052	1.4155
0.00517231	1.42416
0.00517793	1.3712
0.00517843	1.6477
0.00517882	1.46515
0.00517923	1.47028
0.00517955	1.34585
0.00518571	1.53575
0.00519391	1.1218
0.00519524	1.33318
0.00519649	1.37678
0.0051965	0.826237
0.00519965	1.49317
0.00520009	1.70293
0.00520705	1.33318
0.00520712	1.4346
0.00520769	1.52476
0.00520906	1.37678
0.00521152	1.45087
0.00521204	1.44376
0.00521467	1.33145
0.00521602	1.37678
0.00521777	1.33145
0.00521953	0.893278
0.00522386	0.894499
0.00522561	0.808109
0.00523206	1.55605
0.00523384	1.39839
0.00523727	1.13635
0.00524262	1.4346
0.00524263	1.49583
0.00524774	1.49087
0.00524804	1.59865
0.00524903	1.11422
0.00526281	1.12955
0.00527696	1.44514
0.00527707	1.53575
0.00528502	1.75235
0.00528512	1.33403
0.00528518	1.31378
0.00528972	1.5565
0.00529797	1.47028
0.00530201	1.49873
0.00530472	1.71607
0.00531003	1.44514
0.00531451	1.3644
0.00532032	1.72902
0.00532434	1.36781
0.00532694	1.48511
0.00533002	1.59865
0.00534121	1.5565
0.00534173	1.44273
0.00534273	1.49317
0.00535238	1.24818
0.00535424	0.808109
0.00535481	1.10337
0.00535492	1.38094
0.0053697	1.52112
0.00537197	1.44273
0.00537655	1.42133
0.00538047	1.5034
0.00538449	1.49087
0.00538537	1.19258
0.00538681	1.53649
0.0053939	1.61004
0.00540064	1.45298
0.00540379	1.46935
0.00540402	1.43264
0.00540422	1.8175
0.00540514	1.06752
0.0054067	1.75075
0.00540766	0.787549
0.00541264	1.61516
0.00541949	1.48254
0.0054268	1.53649
0.00542762	1.45298
0.00543071	1.45087
0.00543118	1.60398
0.00543323	1.56969
0.00543653	1.57544
0.00544085	1.32333
0.00544242	1.72902
0.00544303	1.13456
0.00544416	1.55484
0.0054528	1.45298
0.00546145	1.53649
0.00546252	1.10337
0.00546283	1.38821
0.0054636	1.52112
0.00546777	1.58107
0.00546927	0.910879
0.00547532	1.57584
0.00547605	1.4558
0.0054831	1.49317
0.00548334	1.53257
0.00548585	1.48412
0.00548613	0.818146
0.00548818	1.39839
0.00548968	0.849012
0.00549104	1.53251
0.00549594	1.61516
0.00549726	1.4558
0.00549739	0.967218
0.00549912	1.64441
0.00551182	1.38813
0.0055158	1.53251
0.00551627	1.47002
0.00551797	1.35616
0.00552499	1.44392
0.00553146	1.7436
0.00553295	1.47002
0.00553599	1.51411
0.00553953	1.48511
0.00554385	1.48254
0.0055456	0.841916
0.00554716	1.48076
0.00555183	1.51411
0.00555472	1.50201
0.00555874	1.48076
0.00555877	1.47571
0.00555959	1.61164
0.00556355	1.51411
0.00556629	1.71568
0.00556754	1.48874
0.00557136	1.49873
0.00557218	1.09905
0.00557331	1.3644
0.00557337	1.48874
0.00557397	1.628
0.00557547	1.49873
0.00557608	1.48874
0.00557995	1.66965
0.00558436	1.20899
0.00560003	1.32333
0.00561509	1.54056
0.00562075	1.49317
0.00562136	0.818146
0.00563563	1.77084
0.00564184	1.46515
0.00564564	1.36592
0.00564729	1.13456
0.00564931	1.45087
0.00564964	1.56292
0.00565352	1.71607
0.00565519	1.47571
0.00565939	1.75532
0.00565956	1.61698
0.00566469	1.66965
0.00566549	1.55604
0.00566932	1.46253
0.00567114	1.48254
0.0056789	1.72789
0.00568225	1.25756
0.00568364	1.19258
0.00568381	1.1059
0.00569184	1.71568
0.0056949	1.42133
0.00570655	1.38813
0.0057078	1.57327
0.0057117	1.54272
0.005725	0.910879
0.00572973	1.60398
0.00573501	1.50201
0.00573585	1.39839
0.00574628	1.44623
0.00575019	1.66965
0.00575285	1.45142
0.00575479	1.05289
0.00575567	1.49317
0.00576001	0.824117
0.00576038	1.50775
0.00576276	1.31005
0.00578089	1.44769
0.00579056	1.76324
0.0057937	1.57544
0.00579742	1.1059
0.00580142	1.50004
0.00581342	1.72789
0.00581424	1.49314
0.00581758	1.46253
0.00581896	1.65865
0.00582381	1.20899
0.00582766	1.48892
0.00583649	1.66965
0.00583902	1.13319
0.00583956	1.39686
0.00585175	1.45142
0.00586723	1.45087
0.00587699	0.938541
0.00588783	1.50378
0.00589032	1.06752
0.0058976	1.36592
0.00590216	0.824117
0.00590883	1.38813
0.00591303	1.10196
0.0059137	0.841916
0.0059189	1.61004
0.00592154	1.49844
0.00592361	1.66965
0.00592385	1.57972
0.00592505	1.78356
0.00592907	1.31005
0.00593474	1.50004
0.00593607	1.38094
0.00593742	1.48412
0.0059475	1.65865
0.00595139	1.712
0.00595186	1.41596
0.00596986	1.47768
0.00597148	0.987958
0.00597374	1.53257
0.00597689	1.38334
0.00597874	1.86201
0.00598478	1.19258
0.00598977	1.52381
0.00599026	1.81067
0.00599147	0.933508
0.00601158	1.69861
0.00601725	1.50378
0.00602712	1.40603
0.00602887	1.60398
0.00603064	1.09862
0.00603132	1.47477
0.0060479	0.83891
0.00605104	1.70123
0.00605318	1.41596
0.00606294	1.77321
0.00607096	1.21052
0.0060712	1.50004
0.00607733	1.59481
0.00607893	1.54648
0.0060844	1.45087
0.0060929	1.712
0.00609899	1.31005
0.00610044	1.69861
0.00611133	1.46515
0.00611335	1.39686
0.00611454	1.49947
0.00611897	1.37278
0.00612626	1.47768
0.00613176	1.67319
0.00613729	1.44769
0.00614389	1.50378
0.0061469	1.52476
0.00615027	1.09862
0.00615569	1.3678
0.00615612	1.57584
0.00615721	1.57544
0.00616037	1.3627
0.00616072	1.8175
0.00619021	1.69861
0.0061959	1.06794
0.00619714	1.61164
0.0061973	0.83891
0.00620431	1.73892
0.00620826	1.59481
0.00620913	1.0439
0.00621085	1.53612
0.00621136	1.38334
0.00622097	0.801203
0.00622803	1.52381
0.0062315	1.49314
0.00623803	1.77634
0.00623896	1.1218
0.00624772	1.77084
0.00625393	1.5831
0.00625937	1.3678
0.00626777	1.50378
0.00626917	0.951139
0.00627192	1.09259
0.00627254	1.31684
0.00627643	1.47907
0.00627664	1.20461
0.00628093	1.69861
0.00628534	1.64022
0.00628687	1.50799
0.00628883	1.19258
0.00629323	1.38821
0.00630072	1.48809
0.00630173	0.841916
0.00630348	1.56292
0.00631423	1.49947
0.00631424	0.799868
0.00631508	1.81067
0.00632368	1.11753
0.00632601	1.21052
0.00632852	1.60398
0.00633728	1.37278
0.00634011	1.59481
0.00634925	1.72389
0.00635046	0.848935
0.00635378	1.53612
0.00635839	1.58107
0.00636418	1.35698
0.00636885	1.05747
0.00637233	0.769753
0.00637264	1.69861
0.00637364	1.40603
0.00638388	1.1218
0.00638526	1.12653
0.00638688	1.799
0.00638887	1.50378
0.00639476	1.39686
0.00639529	1.50783
0.00639561	1.09016
0.00640004	1.55604
0.00640634	1.90371
0.00641186	1.52236
0.00641848	1.05928
0.00643442	1.3627
0.00643709	1.40087
0.00643933	1.38334
0.00644974	1.31684
0.00645179	1.53775
0.00646535	1.69861
0.00647012	1.35698
0.00647265	1.56783
0.0064737	1.44769
0.00647395	1.61004
0.00647533	1.61698
0.00647549	1.51891
0.00648171	1.2101
0.00648694	1.38094
0.00649783	1.7032
0.00650006	1.53612
0.00650719	1.50378
0.00650747	0.848935
0.00651207	1.25637
0.00651611	1.46725
0.00652085	1.50038
0.00652133	1.09016
0.00652715	1.57544
0.00653954	1.799
0.00654541	1.46914
0.00655856	0.951139
0.00655912	1.69861
0.0065641	1.37278
0.00656906	1.51417
0.00657715	1.35266
0.00657999	1.12955
0.00658153	1.57135
0.00658719	1.45543
0.00658917	1.21052
0.00659456	1.94908
0.00659583	1.20405
0.0065969	1.11418
0.00660565	1.56783
0.00661557	0.779074
0.00662112	1.53775
0.00662272	1.50378
0.00662813	1.81067
0.00662863	1.60398
0.00663061	1.31684
0.00663608	1.07657
0.00664125	1.56625
0.00664909	1.08568
0.00664976	1.60296
0.00665015	1.7032
0.00665396	1.80276
0.00665398	1.44623
0.0066573	1.35616
0.00665776	0.967218
0.00666086	1.38334
0.00666839	0.853367
0.00667671	1.40521
0.00668389	1.44241
0.00668525	1.35266
0.00669612	1.82181
0.00669996	1.51417
0.00670002	1.50178
0.00671062	0.854072
0.00671979	1.34144
0.00672024	1.36543
0.00672197	1.54145
0.00672515	1.56969
0.0067305	1.46725
0.0067325	1.51891
0.00673465	1.49739
0.0067349	1.40603
0.00673548	1.51566
0.00673882	1.56913
0.00674992	1.80276
0.00677889	1.08568
0.00677961	1.57135
0.00678923	1.94908
0.00679077	1.44769
0.00679437	1.35266
0.00679495	1.56746
0.00679978	1.37284
0.0068008	1.52236
0.00680296	1.60296
0.00680629	1.69856
0.00681515	1.33067
0.00681592	1.6197
0.00683334	0.82125
0.00683371	1.51417
0.00683764	1.56179
0.00684005	1.05747
0.00684205	1.33403
0.00684545	1.51566
0.00684625	1.61164
0.00684703	1.80276
0.00684777	1.50126
0.00685671	1.72245
0.00685865	1.57942
0.00686015	0.958129
0.00686068	1.24869
0.00686228	1.03262
0.00686902	1.77084
0.00687186	1.56913
0.00687602	1.3821
0.00687616	1.13319
0.00687647	1.8175
0.00689998	1.50126
0.00690357	1.57544
0.00690449	1.34692
0.00690583	1.20405
0.00691073	1.06795
0.00692604	1.40521
0.00692914	1.60398
0.00692955	1.81067
0.00694379	1.46725
0.00694533	1.80276
0.00695265	1.51566
0.00695588	1.49739
0.00695975	1.60296
0.00696633	1.70846
0.00697038	1.48733
0.00697338	1.56746
0.0069808	1.45213
0.00698435	1.56033
0.00699058	1.94908
0.00699939	1.50712
0.0070024	0.83046
0.00700338	1.33067
0.00700444	1.56564
0.00700866	1.38094
0.00701556	1.34692
0.00701838	1.37169
0.0070214	1.72545
0.00704293	1.67319
0.00704459	1.05227
0.00704467	1.37284
0.00704485	1.80276
0.00705685	1.52476
0.00705707	1.51566
0.0070579	1.5313
0.00706056	1.61004
0.00706931	1.45543
0.00708316	0.801203
0.00708486	1.3821
0.00708918	1.43289
0.00709662	1.48892
0.00709748	1.04116
0.00711004	1.48733
0.00711133	1.39494
0.0071202	1.70108
0.0071254	1.49314
0.00712756	1.33516
0.00713036	1.72706
0.00713619	1.56564
0.00714076	1.24869
0.00714136	0.854072
0.00714196	1.57916
0.00714363	1.52236
0.00714564	1.80276
0.0071559	1.46725
0.0071565	1.60528
0.00715872	1.51566
0.00717208	1.40691
0.00717446	0.958129
0.00717565	0.83046
0.00718048	1.05227
0.0071848	1.49805
0.00718551	1.40521
0.00719031	1.72545
0.00719064	1.57972
0.00719531	1.28947
0.00719887	1.95934
0.00721546	1.46284
0.00721887	1.20405
0.0072195	2.02962
0.00721968	0.981186
0.00722998	1.60398
0.00723876	1.628
0.00724042	1.33516
0.00724772	1.80276
0.00725274	1.51139
0.00725761	1.51566
0.00726668	1.56564
0.00727574	1.11251
0.00727653	1.50712
0.00728441	1.70108
0.00728556	1.45213
0.00728656	1.57544
0.00728747	1.3821
0.00729848	1.74706
0.00729915	1.3365
0.00730329	1.05747
0.00731839	1.0488
0.00732414	1.49314
0.00732458	1.90926
0.00732667	1.57942
0.00732936	1.37169
0.00733847	1.61698
0.00734208	1.05078
0.00734441	1.60528
0.00734784	1.54648
0.00735114	1.92558
0.0073532	0.829543
0.00735374	1.51566
0.0073541	1.3343
0.00736354	1.74243
0.00736675	1.46725
0.00736959	1.43289
0.00738688	1.25637
0.00739092	1.29334
0.00739126	1.55829
0.00739547	1.57088
0.00739857	1.51139
0.00741435	1.95934
0.00742016	1.88793
0.00742167	1.4861
0.00742964	1.24869
0.00742999	0.849012
0.00743977	1.11418
0.0074433	1.52236
0.00744713	1.51566
0.00745245	1.70108
0.00745305	1.64022
0.00745558	1.40694
0.00745594	1.92558
0.00745829	1.0488
0.00746856	1.3343
0.00747076	1.77122
0.00747162	1.51167
0.00748264	0.893278
0.00748391	1.3821
0.00749964	1.77084
0.00750205	0.965909
0.0075023	1.39525
0.00750336	1.39494
0.00750671	1.61164
0.00752032	1.56179
0.00752206	1.57088
0.0075311	1.60398
0.007535	1.20405
0.00753514	0.829543
0.00753721	1.63575
0.00753779	1.53945
0.0075412	1.74243
0.00754758	1.50144
0.00755221	1.49776
0.00755277	1.79009
0.00755761	1.45543
0.00756215	1.92558
0.00756351	0.799868
0.00756361	1.38008
0.00756429	1.50744
0.00757331	0.987216
0.00757546	1.1143
0.00757625	1.46725
0.00758373	1.34364
0.00758624	1.54272
0.00759022	1.29334
0.00759497	0.854072
0.0075965	1.05351
0.00759658	1.45528
0.00759824	1.45213
0.00760018	1.04325
0.007613	1.44714
0.00762441	1.89941
0.00762572	1.50963
0.00763263	1.43289
0.007633	1.49776
0.00763354	1.57327
0.00763357	0.769753
0.0076373	1.95934
0.0076459	1.55412
0.0076473	1.79252
0.00765376	1.38127
0.00766677	1.4861
0.00766983	1.92558
0.00767425	1.38203
0.00767619	1.57544
0.00768029	1.62148
0.00768319	1.46284
0.00769286	1.56033
0.00769845	1.01343
0.00769956	1.34364
0.00769985	1.50144
0.00770269	1.54196
0.00771095	1.50963
0.00771393	1.50834
0.00772155	0.823404
0.00772339	1.76113
0.00772757	1.26098
0.00773498	1.63575
0.0077367	1.40694
0.00773947	1.49583
0.00773954	1.06794
0.00774403	1.05082
0.00775792	1.06013
0.00776218	1.03622
0.00776639	1.55412
0.00777901	1.92558
0.00778434	1.46725
0.00779319	1.29334
0.00779348	1.50963
0.00779497	1.50834
0.00779845	1.57942
0.00780037	1.89941
0.00780358	1.12653
0.00781598	1.34364
0.00782717	1.13319
0.00782817	1.80525
0.00783244	1.60398
0.00783626	1.54169
0.00783846	1.38008
0.00784348	0.98189
0.00784732	1.35616
0.00785427	1.20405
0.00785545	1.50144
0.00785857	1.38203
0.00786119	1.07236
0.00786305	1.50744
0.007868	1.92217
0.00787095	1.12955
0.00787334	1.50963
0.00787607	1.4706
0.00787893	1.43289
0.00788288	1.55412
0.00788973	1.92659
0.00788982	1.05082
0.00789178	1.57916
0.00789285	1.67539
0.00790689	1.47907
0.00791023	1.67773
0.0079114	1.39494
0.00791254	0.823404
0.00791888	1.4514
0.00792039	1.49976
0.00792457	1.54196
0.00793294	1.35261
0.00793777	1.52476
0.00793782	1.57416
0.00793834	0.987216
0.00795053	1.50963
0.00795719	1.4706
0.00795934	0.826163
0.00796609	1.628
0.00796892	1.39525
0.00798044	1.89941
0.00799092	1.46725
0.00799218	1.38127
0.00799465	1.55181
0.00799651	0.801203
0.00799982	1.30661
[truncated: 22,948 more rows]
