# Supplementary material for: SSNA1 stabilizes dynamic microtubules and detects microtubule damage
Source: eLife journal article supplement (doi:10.7554/elife.67282), 2021-12-31
Supplement: supp [file elife-67282-supp-v1.zip › elife_poa_e67282_Figure_4_source_data_1.xlsx]

## Sheet: Fig4E
Single molecule: 0-5 min	Single molecule: 5-10 min		Spiking: 0-5 min	Spiking: 5-10 min
dwell time (s)	dwell time (s)		dwell time (s)	dwell time (s)
210	102.934		203.933	275.6
152.2	77.6		182.933	275.6
132.133	69.6668		168.1	275.5
103.334	55.85		116.067	272.3
82.2	53.6		102.8	272
47.8	45.7332		91.9	272
42.4668	45.2		88.9332	271.867
40.2664	40		81.2	271.8
38.6	38.6664		76.2	271.6
37.7	38.5332		72.9332	248.4
33.1332	26.2		72	244.8
31.9	26		64.05	233.517
30.05	22.9		62.2664	206.667
26.1332	19.65		54.1332	197.533
24.9336	18.6668		53.6	187.7
24.8	18.65		50.9	176
22.3	18.5332		45.3332	173
19.7	18.4668		43.4	172.55
19.5	16.7668		40.9332	172.05
19.0668	16.2		40	161.4
18.6	15		33.6	159.4
17.8	12.7332		32.4664	158.534
14.8	12.6		31.9336	155.133
14.4668	12.55		31.6	151.467
14.3	10.1336		30.4	140.866
13.9336	9.6		30.4	130.85
12.8	8.55		30	128.8
12.55	8.5		29.7	128.267
12.45	8.4		29	120.267
12.2	8.2		26.2	119.55
11.6664	7.7336		25.5	109
11.2332	7.6		25.2	108.4
11.1	7.3336		24	104.2
10.8	7.1		23	98.95
10.4664	6.6		22.0664	97.3668
10.4	6.6		21.1	93.9
9.3332	6.3		21	93.2
9.1	6.2		19.8	92.6
8.95	6.2		19.55	91.6
8.0664	6		19.1336	90.4
8	5.7		18.9336	88.6664
7.8	5.6336		16.6	88.3
7.6	5.6332		14.8	87.4
7.2668	4.8		14.1832	86.4
6.9	4.6		14.1	86.4
6.5332	4.5332		13.3336	85.0332
6.4664	4.4		12.5336	82.4
6.45	4.15		11.65	81
6.25	4.0668		11.3332	80
6	4		11.0664	77.6
5.6	3.8		10.7332	76.2
5.55	3.8		10.7	75.4668
5.4	3.6668		10.4664	73.6
5.3	3.25		10.2668	73.1
5.2	3.2		9.8668	70.6
5.1	3.2		9.6668	70
5.05	3.2		9.6	68.1332
5	3		9.5	66.8668
4.9336	2.9332		9.0668	65.7
4.8664	2.9		8.4332	64.7
4.7668	2.5		8.2664	62.5
4.7336	2.45		8.2	62.4
4.7	2.4332		7.7336	60
4.6	2.4248		6.5	58
4.5	2.4		6.5	57.2
4.5	2.4		6	57
4.4	2.2		5.9	54.7
4.4	2.1336		5.6668	53.6668
4.2668	2.1332		5.4	53.55
4.2664	2.1332		5.15	48.7
4.1332	2.0664		5	48.6
4.1	2.05		4.9332	44.3
3.9	2.05		4.9	43.1
3.7	2		4.8664	42.6
3.7	1.9664		4.8	41.2
3.6	1.9504		4.8	40.9332
3.55	1.9332		4.6668	40.8668
3.4668	1.75		4.6	40.4
3.4	1.7336		4.5332	40.3336
3.3664	1.7		4.5	38.7332
3.3332	1.7		4.2664	38.4668
3.2	1.65		4.1	38
3.2	1.65		4.1	35.3
3.15	1.65		4.0664	33.6664
3.1	1.6336		4.05	32.7336
3	1.6332		3.75	32.4
2.95	1.6		3.7	31.6
2.95	1.6		3.6664	31.3668
2.9336	1.6		3.65	31.3332
2.9	1.6		3.5	30.8
2.8668	1.55		3.4	30.7668
2.8336	1.5336		3.4	30.4
2.8332	1.35		3.3	29.6
2.8248	1.3332		3.3	29.5332
2.8	1.3252		3.2668	29.5
2.6	1.3		3.2	29.4668
2.6	1.3		3.0668	28.4
2.6	1.3		3.0664	28.1332
2.6	1.25		3	27.7
2.55	1.25		3	27.5
2.5332	1.2336		2.9	27.2
2.5	1.2336		2.9	25.7332
2.4664	1.2332		2.8	25.4
2.4336	1.2		2.8	25.3332
2.4	1.2		2.7332	25.2
2.4	1.1668		2.6	25
2.4	1.15		2.6	24
2.35			2.5	23.95
2.2			2.45	23.2
2.1336			2.4	23.2
2.1			2.4	22.4
2.1			2.35	20.6
2.0664			2.2	20.55
2			2.1	20.1
2			2.1	18.7336
2			2.0332	18.5
2			2	18.1332
2			2	17.0664
1.9			2	16.5336
1.85			2	16.5
1.8			1.9	16.45
1.75			1.7332	16.3
1.7332			1.7	15.7332
1.7332			1.7	15.7
1.7			1.7	15.5
1.7			1.6668	15.3332
1.6664			1.6668	14.4
1.65			1.6664	14
1.6			1.6	13.8668
1.6			1.5668	13.7332
1.5			1.55	13.6
1.4			1.55	13.4
1.4			1.5336	13
1.35			1.45	12.6664
1.3			1.35	12.6
1.2748			1.3	12.4
1.2668			1.2668	12.4
1.2664			1.2668	12.3332
1.25			1.2336	12.3
1.2			1.2336	12
1.2			1.2	10.9332
1.1332			1.1664	10.8
			1.15	10.8
			1.1	10.5332
				10.4
				10.4
				9.8332
				9.0664
				9
				8.8
				8.7
				8.6
				8.6
				8.5
				8.4
				8.4
				8.3332
				8.3
				8.2
				8
				7.9332
				7.8664
				7.8
				7.8
				7.7332
				7.6
				7.4
				7.4
				7.4
				7.3336
				7.3
				7.1332
				7.1
				7.1
				7
				7
				6.9
				6.8
				6.6
				6.55
				6.4
				6.4
				6.3
				6.2
				5.9332
				5.8
				5.65
				5.5
				5.4668
				5.2668
				5.2
				5.0668
				5.0668
				5.0336
				5
				4.8668
				4.8
				4.7336
				4.6
				4.6
				4.6
				4.5336
				4.5
				4.4
				4.4
				4.4
				4.35
				4.3332
				4.3
				4.3
				4.2
				4.1
				4.0664
				4
				3.8
				3.8
				3.8
				3.7332
				3.7
				3.6
				3.6
				3.4668
				3.4664
				3.3
				3.05
				2.9332
				2.9332
				2.9332
				2.9
				2.8
				2.8
				2.5332
				2.4668
				2.4668
				2.45
				2.45
				2.4
				2.3332
				2.2664
				2.2
				2.2
				2.2
				2.15
				2.1332
				2.1332
				2.1
				2.1
				2.0664
				1.95
				1.9336
				1.9
				1.7332
				1.7
				1.7
				1.65
				1.6336
				1.6332
				1.6332
				1.6
				1.6
				1.6
				1.6
				1.6
				1.5664
				1.5332
				1.5332
				1.5332
				1.5332
				1.5
				1.45
				1.4
				1.4
				1.4
				1.35
				1.3336
				1.3336
				1.3332
				1.3
				1.3
				1.3
				1.3
				1.3
				1.3
				1.2668
				1.2668
				1.2668
				1.25
				1.25
				1.25
				1.2
				1.2
				1.2
				1.2
				1.2

## Sheet: Fig4S1
Repeat 1		Repeat 2		Repeat 3		Repeat 4
Time (s)	Normalized Intensity	Time (s)	Normalized Intensity	Time (s)	Normalized Intensity	Time (s)	Normalized Intensity
0	0	0	0	0	0	0	0
10.002	0.0573617	5.001	0.0223254	5.004	0.00878023	5	0.00725217
20.004	0.123194	10.002	0.0526598	10.007	0.0390009	10.001	0.0274728
30.006	0.19373	15.003	0.0615458	15.011	0.0635807	15.001	0.0512001
40.008	0.231925	20.004	0.0764685	20.014	0.0842768	20.002	0.0663783
50.01	0.293571	25.005	0.100999	25.018	0.113437	25.002	0.0764671
60.013	0.356463	30.006	0.127138	30.021	0.127854	30.002	0.101178
70.015	0.406544	35.007	0.151263	35.025	0.15069	35.003	0.123788
80.017	0.454945	40.008	0.168289	40.028	0.172272	40.003	0.144836
90.019	0.489681	45.009	0.186905	45.032	0.196985	45.003	0.156715
100.021	0.558664	50.01	0.203806	50.036	0.201752	50.004	0.191209
110.023	0.609053	55.011	0.218326	55.039	0.219723	55.004	0.212154
120.025	0.647625	60.012	0.23809	60.043	0.242273	60.005	0.230122
130.027	0.671175	65.013	0.256805	65.046	0.259259	65.005	0.24427
140.029	0.706317	70.014	0.270041	70.05	0.27145	70.005	0.270744
150.031	0.733129	75.015	0.284422	75.053	0.284232	75.006	0.296849
160.034	0.754942	80.016	0.294502	80.057	0.29061	80.006	0.313638
170.036	0.787088	85.017	0.314205	85.061	0.307164	85.006	0.341569
180.038	0.797589	90.018	0.327954	90.064	0.323562	90.007	0.35328
190.04	0.818884	95.019	0.357597	95.068	0.338862	95.007	0.382547
200.042	0.827285	100.02	0.376956	100.071	0.342806	100.008	0.402051
210.044	0.826249	105.021	0.3833	105.075	0.361412	105.008	0.435925
220.046	0.834915	110.022	0.398336	110.078	0.370895	110.008	0.441795
230.048	0.828713	115.023	0.407508	115.082	0.381225	115.009	0.478228
240.05	0.840306	120.024	0.434417	120.085	0.390081	120.009	0.490291
250.052	0.858115	125.025	0.46603	125.089	0.403452	125.009	0.508945
260.055	0.85089	130.026	0.482044	130.093	0.411165	130.01	0.539148
270.057	0.876722	135.027	0.486269	135.096	0.415486	135.01	0.549958
280.059	0.879872	140.028	0.505862	140.1	0.426237	140.011	0.578226
290.061	0.882448	145.029	0.534518	145.103	0.437768	145.011	0.59264
300.063	0.862301	150.03	0.560832	150.107	0.451753	150.011	0.630939
310.065	0.875714	155.031	0.583175	155.11	0.454257	155.012	0.649224
320.067	0.87801	160.032	0.585004	160.114	0.464145	160.012	0.663242
330.069	0.885571	165.033	0.63726	165.118	0.475198	165.012	0.687643
340.071	0.888259	170.033	0.643857	170.121	0.479145	170.013	0.713737
350.073	0.886705	175.034	0.66151	175.125	0.489161	175.013	0.729832
360.076	0.892221	180.035	0.683948	180.128	0.49299	180.014	0.749861
370.078	0.903646	185.036	0.704661	185.132	0.504421	185.014	0.762101
380.08	0.920657	190.037	0.711498	190.135	0.50514	190.014	0.788363
390.082	0.917199	195.038	0.727433	195.139	0.515673	195.015	0.798628
400.084	0.924255	200.039	0.750745	200.143	0.530777	200.015	0.803369
410.086	0.919663	205.04	0.766969	205.146	0.536996	205.015	0.833729
420.088	0.938564	210.041	0.788587	210.15	0.542628	210.016	0.856735
430.09	0.953713	215.042	0.793012	215.153	0.555764	215.016	0.868513
440.092	0.980959	220.043	0.804018	220.157	0.551258	220.017	0.875173
450.094	1	225.044	0.814486	225.16	0.567284	225.017	0.89309
		230.045	0.822414	230.164	0.573666	230.017	0.90591
		235.046	0.839726	235.167	0.577708	235.018	0.903042
		240.047	0.83234	240.171	0.58691	240.018	0.91592
		245.048	0.847022	245.175	0.591152	245.018	0.921942
		250.049	0.861108	250.178	0.603275	250.019	0.929927
		255.05	0.856899	255.182	0.604749	255.019	0.93638
		260.051	0.851451	260.185	0.605784	260.02	0.93971
		265.052	0.871687	265.189	0.626268	265.02	0.956648
		270.053	0.868629	270.192	0.637529	270.02	0.947284
		275.054	0.869334	275.196	0.636486	275.021	0.94728
		280.055	0.8945	280.199	0.64568	280.021	0.969005
		285.056	0.901939	285.203	0.646487	285.021	0.961988
		290.057	0.911532	290.207	0.66149	290.022	0.963253
		295.058	0.912259	295.21	0.671845	295.022	0.965757
		300.059	0.921722	300.214	0.684048	300.023	0.970047
		305.06	0.920114	305.217	0.690144	305.023	0.966756
		310.061	0.928902	310.221	0.70408	310.023	0.973205
		315.062	0.92439	315.224	0.707918	315.024	0.972084
		320.063	0.922404	320.228	0.717968	320.024	0.967986
		325.064	0.929622	325.232	0.734513	325.024	0.976108
		330.065	0.937537	330.235	0.739625	330.025	0.969256
		335.066	0.927348	335.239	0.743887	335.025	0.958395
		340.067	0.925223	340.242	0.754955	340.026	0.96533
		345.068	0.936836	345.246	0.755378	345.026	0.964166
		350.069	0.923542	350.249	0.774345	350.026	0.963629
		355.07	0.944164	355.253	0.791502	355.027	0.953662
		360.071	0.954725	360.257	0.796553	360.027	0.955112
		365.072	0.947334	365.26	0.820549	365.027	0.952432
		370.073	0.971814	370.264	0.822785	370.028	0.973558
		375.074	0.960664	375.267	0.829499	375.028	0.98298
		380.075	0.955574	380.271	0.84655	380.029	0.97985
		385.076	0.946303	385.274	0.861336	385.029	0.971724
		390.077	0.941685	390.278	0.863974	390.029	0.981907
		395.078	0.947635	395.281	0.87305	395.03	0.984301
		400.079	0.952927	400.285	0.883659	400.03	0.963692
		405.08	0.969536	405.289	0.895419	405.03	0.971716
		410.081	0.966489	410.292	0.9079	410.031	0.974541
		415.082	0.973705	415.296	0.914568	415.031	0.977726
		420.083	0.965382	420.299	0.933489	420.032	0.9761
		425.084	0.979508	425.303	0.944005	425.032	0.965581
		430.085	0.997539	430.306	0.960511	430.032	0.996145
		435.086	0.983521	435.31	0.970215	435.033	1
		440.087	0.994759	440.314	0.986002	440.033	0.984959
		445.088	0.992761	445.317	0.991216	445.033	0.984642
		450.089	1	450.321	1	450.034	0.983799
