# Supplementary material for: SSNA1 stabilizes dynamic microtubules and detects microtubule damage
Source: eLife journal article supplement (doi:10.7554/elife.67282), 2021-12-31
Supplement: supp [file elife-67282-supp-v1.zip › elife_poa_e67282_Figure_5_source_data_1.xlsx]

## Sheet: Fig5C
	Normalized SEED Fluorescence Intensity (data normalized to the min and max intensities of the seed at the 1 minute timepoint)												Normalized SSNA1 Fluorescence Intensity (data normalized to the min and max intensities of the SSNA1 at the 10 minute timepoint)
Distance (µm)	0 min	1 min	2 min	3 min	4 min	5 min	6 min	7 min	8 min	9 min	10 min		0 min	1 min	2 min	3 min	4 min	5 min	6 min	7 min	8 min	9 min	10 min
0	0.00271368	-0.000210107	-0.0041391	-0.0071102	-0.00261982	-0.00552442	-0.00722064	0.000331048	-0.0183499	-0.0107513	0.00389479		-0.0399421	-0.0333209	-0.0369715	-0.0225021	-0.0221641	-0.00591629	-8.10228e-06	-0.014147	0.00359808	0.0161659	0.0104737
0.16	0.0168683	0.00384582	-0.0159082	-0.00472358	-0.00453709	-0.00595453	-0.00328235	-0.00619242	0.000344853	-0.0111844	-0.00346233		-0.0658247	-0.0208537	-0.0164948	-0.0123338	-0.0241261	-0.0124259	-0.00804922	-0.0120448	-0.00143091	0.00712257	0.00913232
0.32	0.0276727	0.00523557	0.0153414	-0.00543465	-0.00371863	-0.00663963	-0.00501348	0.00240373	-0.00404594	-0.00633298	-0.00968479		-0.03471	-0.0244866	-0.0115677	-0.0149693	-0.0105996	0.00824879	0.00233163	0.000491045	-0.00754392	0.00507092	0.0152822
0.48	0.0150232	0.00607868	-0.000427246	-0.00441589	-0.00332403	-0.0137337	-0.0130714	-0.00453388	-0.00842884	-0.00735895	-0.0080029		-0.00902266	-0.0196119	-0.0230816	-0.00473284	0.00372072	-0.00637641	-0.00171565	-9.70822e-05	0.00381565	0.0116111	0
0.64	0	0.00486449	-0.00270838	-0.00251599	-0.00575779	-0.00495947	-0.00879583	-0.0101904	-0.00453205	-0.0115442	-0.00456453		-0.0287348	-0.0169673	-0.00442146	-0.00177385	0.0119017	0.00648226	0.00191548	0.00478459	0.0284987	0.0246093	0.0239821
0.8	0.0193807	0.00882023	-0.00593144	0.0092941	0.000863608	0.00764849	-0.00308683	-0.00754318	-0.00439054	-0.014264	-0.00178851		0.0153947	0.00203597	-0.00017189	0.0116113	0.011208	-0.000460901	0.00551333	0.0130759	0.0100867	0.0231732	0.0444032
0.96	0.0183538	0.036289	0.00489766	0.0209961	0.0114922	0.0174574	0.00958495	0.025854	0.00849578	-0.000653849	0.00175187		0.02292	0.0211129	0.0171898	0.0134085	0.0137371	0.0244868	0.011251	0.0184457	0.0112122	0.0236201	0.0254376
1.12	0.0303318	0.0338634	0.0198131	0.0399199	0.0357355	0.0298879	0.0384601	0.0330693	0.00942424	0.0154251	0.0299462		-0.00136211	0.00286809	0.0166789	0.0132999	0.0238522	0.0371865	0.0303416	0.0524682	0.0183156	0.0424688	0.0237944
1.28	0.0901089	0.0901568	0.0757912	0.100606	0.0775424	0.0664533	0.0893815	0.066028	0.0743932	0.0611269	0.0615165		0.013188	0.0196408	0.0316912	0.0310097	0.0528496	0.0669486	0.0626642	0.060787	0.0774773	0.0773739	0.0722259
1.44	0.218429	0.215007	0.236265	0.226363	0.193967	0.185511	0.177193	0.164768	0.164654	0.192445	0.146854		0.0253305	0.0298683	0.0563757	0.0660372	0.0798371	0.105338	0.114768	0.118246	0.142969	0.157298	0.145583
1.6	0.398727	0.375031	0.313391	0.362174	0.315983	0.315811	0.313009	0.291816	0.354076	0.303107	0.274254		0.027508	0.0493351	0.0516576	0.0853819	0.114896	0.128741	0.128594	0.140934	0.150171	0.211507	0.186587
1.76	0.504622	0.469302	0.476027	0.462903	0.419188	0.430582	0.440933	0.428299	0.424035	0.440677	0.380785		0.0228788	0.020289	0.0284559	0.0756788	0.114705	0.113122	0.113803	0.127335	0.123696	0.194089	0.200562
1.92	0.581892	0.546312	0.582492	0.576298	0.511662	0.506682	0.519356	0.535542	0.505102	0.537336	0.487414		0.0306194	0.014797	0.0281123	0.0593646	0.0778125	0.108789	0.106257	0.14025	0.125038	0.211917	0.229923
2.08	0.696758	0.658462	0.667228	0.640996	0.600332	0.602945	0.611528	0.576515	0.576693	0.54666	0.579528		0.016036	0.0214292	0.0370894	0.0665842	0.0836915	0.0949663	0.0863435	0.163717	0.163258	0.23692	0.251469
2.24	0.757565	0.737183	0.706839	0.716632	0.712597	0.693982	0.686749	0.6504	0.65903	0.582635	0.642452		0.0398754	0.0264148	0.0337053	0.0609421	0.0882301	0.0836446	0.0818002	0.183752	0.202817	0.248594	0.292173
2.4	0.77208	0.78863	0.781586	0.775193	0.780475	0.741251	0.734443	0.710498	0.730597	0.655407	0.713946		0.019635	0.041351	0.0301709	0.0432709	0.0626524	0.120855	0.121858	0.183022	0.201734	0.269826	0.309497
2.56	0.837271	0.769425	0.799492	0.785458	0.798969	0.735852	0.771773	0.797915	0.824685	0.722408	0.748587		0.0394249	0.0369982	0.0632835	0.0551534	0.0351892	0.135274	0.14611	0.147603	0.168214	0.258426	0.288217
2.72	0.805926	0.778822	0.752543	0.800115	0.792316	0.706914	0.758713	0.780682	0.776674	0.729646	0.717639		0.0344168	0.0381007	0.0783695	0.0611795	0.0443156	0.147203	0.152271	0.140819	0.176454	0.251548	0.282547
2.88	0.729404	0.694825	0.672988	0.707474	0.695192	0.671653	0.704003	0.696825	0.642209	0.639358	0.661499		0.0506395	0.0765469	0.0875861	0.086468	0.08471	0.170458	0.216276	0.200927	0.219846	0.293704	0.318881
3.04	0.629166	0.606497	0.583251	0.594558	0.581998	0.581903	0.584427	0.58748	0.573849	0.542328	0.505963		0.0736136	0.0974944	0.163616	0.144692	0.161387	0.252937	0.309412	0.33188	0.302054	0.427308	0.439382
3.2	0.568046	0.546374	0.480156	0.465623	0.479924	0.465942	0.449473	0.443807	0.439405	0.444971	0.379762		0.120414	0.191122	0.237862	0.222374	0.237663	0.362834	0.401661	0.480401	0.462001	0.616532	0.643367
3.36	0.520599	0.480192	0.400294	0.364882	0.393362	0.409818	0.373024	0.364461	0.357142	0.367173	0.338126		0.149756	0.253846	0.305942	0.317121	0.340178	0.472511	0.487981	0.629893	0.692929	0.797293	0.807467
3.52	0.601769	0.505165	0.424875	0.395901	0.413202	0.451608	0.409586	0.39975	0.442213	0.379392	0.387374		0.157717	0.250717	0.293007	0.324852	0.355991	0.463838	0.50152	0.676121	0.765997	0.816256	0.849464
3.68	0.665759	0.642015	0.578372	0.542394	0.548784	0.600733	0.558239	0.547494	0.593859	0.54616	0.555708		0.126921	0.177128	0.202398	0.234508	0.278785	0.355417	0.384842	0.513529	0.529045	0.666394	0.712051
3.84	0.774116	0.69975	0.662401	0.653106	0.657542	0.707623	0.706995	0.643317	0.682013	0.671146	0.658193		0.076433	0.10856	0.137254	0.150211	0.186446	0.233544	0.242833	0.323256	0.299333	0.397024	0.458186
4	0.874155	0.729208	0.673484	0.684612	0.684876	0.762202	0.76136	0.680726	0.718128	0.766902	0.683389		0.04715	0.0735998	0.10544	0.108484	0.114814	0.178363	0.164917	0.215314	0.193473	0.233764	0.305461
4.16	0.853077	0.767618	0.744771	0.76237	0.737985	0.799384	0.786886	0.741842	0.725364	0.807107	0.747443		0.0299544	0.055253	0.0824921	0.0914908	0.100281	0.154867	0.13878	0.172186	0.197951	0.203566	0.282467
4.32	0.933495	0.826406	0.826862	0.84473	0.815002	0.833443	0.853344	0.855342	0.851692	0.840392	0.835763		0.0425933	0.0425186	0.0635338	0.0809763	0.101763	0.124825	0.140835	0.177614	0.238597	0.253016	0.293469
4.48	0.87912	0.792425	0.809746	0.827874	0.801665	0.839613	0.829831	0.854923	0.784384	0.810967	0.812197		0.0230809	0.0470775	0.0913195	0.0958016	0.106342	0.118959	0.16471	0.176354	0.273484	0.317909	0.323696
4.64	0.838786	0.766406	0.710702	0.786605	0.779502	0.779002	0.745156	0.784744	0.732514	0.691362	0.712667		0.0577768	0.0693465	0.109203	0.139108	0.131094	0.170234	0.245313	0.225821	0.348941	0.434507	0.454613
4.8	0.817204	0.776746	0.714138	0.745963	0.729853	0.657805	0.671346	0.68235	0.626013	0.550852	0.540236		0.125239	0.11657	0.181495	0.222469	0.23138	0.274785	0.361965	0.382472	0.540521	0.636903	0.678334
4.96	0.728159	0.714078	0.63797	0.633886	0.594656	0.534263	0.550671	0.5257	0.478439	0.416271	0.395239		0.183592	0.172629	0.304587	0.310144	0.342735	0.40539	0.5135	0.611147	0.759756	0.836523	0.869243
5.12	0.567377	0.52862	0.458839	0.442645	0.400971	0.380853	0.3881	0.357584	0.330129	0.30614	0.282092		0.247017	0.254697	0.33623	0.392943	0.437973	0.572426	0.69225	0.810307	0.908339	0.941097	0.963917
5.28	0.462076	0.429666	0.367056	0.351835	0.316766	0.285618	0.269556	0.25218	0.237402	0.234771	0.213407		0.280754	0.312409	0.386099	0.43949	0.52648	0.700843	0.794204	0.919005	0.96099	0.975988	0.985233
5.44	0.45654	0.436444	0.404482	0.369885	0.329834	0.286077	0.252195	0.231971	0.235866	0.250608	0.197807		0.275534	0.338289	0.456878	0.46482	0.593361	0.761224	0.817374	0.954728	0.951722	0.986821	0.988146
5.6	0.567561	0.502843	0.480412	0.432841	0.404335	0.365205	0.34272	0.306639	0.307104	0.308302	0.267675		0.230956	0.34317	0.476012	0.491003	0.611966	0.765364	0.828386	0.951698	0.935274	0.988753	1
5.76	0.742886	0.66957	0.600945	0.594079	0.555342	0.513227	0.490524	0.48316	0.47885	0.442904	0.425061		0.170548	0.297032	0.373995	0.433702	0.517393	0.705187	0.773273	0.923148	0.908501	0.94589	0.98779
5.92	0.857549	0.824386	0.743723	0.783104	0.709094	0.667745	0.630237	0.629417	0.640021	0.600966	0.598438		0.12321	0.194622	0.212475	0.29938	0.371495	0.505367	0.594206	0.725841	0.7228	0.781324	0.879548
6.08	0.914663	0.873432	0.853925	0.841543	0.785836	0.759577	0.72808	0.717129	0.727856	0.705883	0.719941		0.080581	0.122634	0.132321	0.208689	0.25252	0.315479	0.386886	0.465302	0.464489	0.537834	0.672128
6.24	0.958688	0.869738	0.849732	0.835506	0.820536	0.775224	0.773128	0.786178	0.776488	0.78065	0.75413		0.071918	0.109629	0.119922	0.163549	0.186041	0.223536	0.253894	0.316896	0.314	0.363153	0.466665
6.4	0.935877	0.87815	0.869125	0.857557	0.897388	0.830753	0.788609	0.82396	0.796263	0.819674	0.799568		0.0927883	0.106618	0.109639	0.131586	0.165111	0.189809	0.22182	0.274725	0.295007	0.316656	0.389946
6.56	0.971819	0.952079	0.924512	0.902379	0.946691	0.867353	0.806679	0.831616	0.861279	0.851759	0.829677		0.106152	0.10281	0.125414	0.144419	0.17768	0.195238	0.252127	0.308693	0.344668	0.365412	0.441799
6.72	1	0.989946	0.917618	0.907044	0.899652	0.817335	0.798234	0.807007	0.849562	0.806076	0.746979		0.113106	0.123786	0.164545	0.20121	0.230998	0.261016	0.341398	0.416533	0.491863	0.52631	0.620578
6.88	0.952111	0.884023	0.839396	0.816829	0.767724	0.731293	0.696917	0.673299	0.690342	0.644822	0.597035		0.126263	0.188836	0.256359	0.278034	0.367005	0.421854	0.511485	0.627743	0.721909	0.7584	0.826825
7.04	0.871731	0.743379	0.713984	0.66746	0.610636	0.584251	0.551666	0.485045	0.491301	0.461428	0.446761		0.170868	0.258677	0.373435	0.384817	0.565296	0.655228	0.714096	0.839834	0.883501	0.92457	0.958377
7.2	0.853256	0.663299	0.631246	0.582037	0.54961	0.489567	0.487326	0.407522	0.447948	0.400965	0.374528		0.223245	0.315708	0.387073	0.474133	0.709612	0.804589	0.841722	0.918599	0.948205	0.972175	0.978206
7.36	0.901273	0.719597	0.681616	0.630044	0.641547	0.567754	0.540474	0.517967	0.512328	0.46396	0.446386		0.217041	0.304619	0.314998	0.420415	0.635809	0.73451	0.813463	0.900325	0.919015	0.902479	0.880484
7.52	0.921264	0.775318	0.767378	0.724962	0.74729	0.679349	0.638656	0.644027	0.595409	0.553084	0.548855		0.148997	0.221543	0.232824	0.28642	0.433649	0.51464	0.630752	0.722549	0.750457	0.791946	0.790519
7.68	0.893247	0.765359	0.780632	0.75145	0.751499	0.703815	0.679681	0.69728	0.647233	0.58778	0.583718		0.122306	0.173746	0.22892	0.22373	0.320826	0.356247	0.419316	0.462744	0.516868	0.637666	0.704062
7.84	0.79317	0.720259	0.704756	0.684406	0.677248	0.624852	0.635855	0.677469	0.579736	0.576682	0.526827		0.135988	0.207567	0.300338	0.25328	0.326158	0.365535	0.382569	0.392506	0.439062	0.531367	0.632184
8	0.723281	0.665015	0.618899	0.613351	0.596597	0.537033	0.57531	0.600929	0.51132	0.510204	0.459828		0.170772	0.269287	0.388858	0.309081	0.400058	0.439468	0.4801	0.500244	0.534826	0.606474	0.706092
8.16	0.791478	0.699718	0.649008	0.62897	0.62224	0.601306	0.59863	0.622079	0.545992	0.484614	0.47883		0.169203	0.264131	0.386436	0.340304	0.427544	0.459293	0.514025	0.56198	0.591886	0.658692	0.788636
8.32	0.907843	0.801003	0.705385	0.658256	0.692933	0.714063	0.665811	0.708605	0.627342	0.559305	0.529694		0.0994408	0.198167	0.271758	0.298564	0.364427	0.356241	0.431048	0.472032	0.523174	0.568763	0.744818
8.48	0.893609	0.778847	0.674654	0.586439	0.656131	0.677426	0.638585	0.687172	0.58923	0.550537	0.518259		0.049304	0.129772	0.175162	0.220364	0.275362	0.239319	0.317053	0.327244	0.423787	0.429064	0.591983
8.64	0.632953	0.574616	0.50197	0.441542	0.463594	0.476152	0.482898	0.487148	0.381132	0.406649	0.375285		0.0425801	0.0918591	0.10345	0.158517	0.195856	0.182791	0.223445	0.202125	0.315565	0.312078	0.420234
8.8	0.281068	0.307116	0.239267	0.246573	0.236405	0.245761	0.267814	0.255684	0.193443	0.216362	0.198751		0.028946	0.0672569	0.0775166	0.106724	0.140561	0.140881	0.153093	0.135854	0.206959	0.19434	0.281131
8.96	0.126307	0.152897	0.112229	0.115052	0.118735	0.128216	0.119439	0.128708	0.106272	0.10279	0.100325		0.0273769	0.0600486	0.0832855	0.0765989	0.110056	0.103724	0.108581	0.117094	0.150304	0.125378	0.195162
9.12	0.100398	0.0794262	0.0716204	0.07607	0.0757305	0.0930143	0.070209	0.0822205	0.0713699	0.0576364	0.0607684		0.0492596	0.0642938	0.0666043	0.0599641	0.0937287	0.0980322	0.0860585	0.114128	0.128288	0.116752	0.143776
9.28	0.0898863	0.0653031	0.0702698	0.0656114	0.0635953	0.074667	0.0661306	0.0665463	0.0523824	0.0612802	0.0538504		0.037131	0.0622508	0.0631323	0.0537258	0.099335	0.0860928	0.0983994	0.100206	0.106962	0.105682	0.119808
9.44	0.0808306	0.0580261	0.0578645	0.0512827	0.0606573	0.0487027	0.0609758	0.0515016	0.0373937	0.0570296	0.0555807		0.0437984	0.0631548	0.0594362	0.0665319	0.0965557	0.0858174	0.103578	0.1044	0.111799	0.108132	0.130901
9.6	0.052084	0.0368357	0.0296451	0.0328707	0.0347126	0.0194859	0.0355571	0.0298168	0.028345	0.0232718	0.0442832		0.0641789	0.081527	0.0547335	0.0834885	0.0854165	0.105302	0.0940154	0.108821	0.12257	0.114691	0.13295
9.76	0.0205831	0.0185457	0.0139941	0.0274935	0.0143515	0.0153593	0.0158029	0.0207304	0.0206233	0.00982431	0.0262836		0.0624521	0.0784842	0.0604138	0.0904311	0.0979242	0.101535	0.101701	0.115418	0.131727	0.12825	0.126495
9.92	0.0143729	0.0124693	0.0181024	0.0260394	0.00804501	0.0329766	0.0194559	0.0255085	0.0245519	0.0146213	0.0219839		0.0857495	0.0730772	0.0913271	0.10471	0.1029	0.102562	0.111568	0.119704	0.126317	0.126374	0.114978
10.08	0.0188211	0.0240762	0.0287693	0.0237533	0.0132701	0.0407365	0.0226269	0.0340402	0.0198428	0.0146941	0.020006		0.0871937	0.0937688	0.101941	0.105875	0.101483	0.105576	0.109858	0.113827	0.111963	0.124607	0.0986681
10.24	0.0165828	0.0280171	0.0334589	0.0258059	0.0258019	0.0352948	0.0242711	0.0258502	0.00867949	0.0181274	0.0174818		0.0936807	0.0963157	0.102865	0.0987696	0.113814	0.111848	0.0946432	0.120019	0.108515	0.11392	0.0984218
10.4	0.00904058	0.0321113	0.026354	0.0266127	0.0270116	0.0352465	0.0269177	0.021277	0.0171327	0.0144867	0.0222483		0.0781559	0.0824814	0.105633	0.0944407	0.1213	0.102234	0.088093	0.0946474	0.128757	0.0969831	0.107036
10.56	0.00719355	0.0207054	0.0166554	0.0186282	0.0283679	0.025925	0.0274077	0.0176992	0.0184454	0.0191106	0.0161167		0.0776027	0.0793829	0.0731455	0.0912445	0.11356	0.11163	0.0824252	0.0859301	0.12404	0.086302	0.0954374
10.72	0.0249549	0.0262263	0.0217085	0.021512	0.0276464	0.0265556	0.024353	0.0232098	0.018344	0.0115589	0.0188206		0.0876437	0.100144	0.0791327	0.0897553	0.0933922	0.109692	0.0623389	0.087927	0.109589	0.0983423	0.0844089
10.88	0.037519	0.0348702	0.0362673	0.0352877	0.0316093	0.03316	0.0287968	0.0285558	0.0241762	0.0236783	0.0356226		0.0748331	0.0901918	0.0939131	0.0846071	0.0973032	0.114011	0.0595257	0.0964732	0.0937298	0.100503	0.0771448
11.04	0.0384481	0.043747	0.0329587	0.0350296	0.03538	0.0324661	0.0447326	0.0421978	0.038655	0.0387192	0.0351075		0.079711	0.0646641	0.087121	0.0907438	0.106367	0.127446	0.0874456	0.0972219	0.0881268	0.0905663	0.101106
11.2	0.0435337	0.0333031	0.0464095	0.0247562	0.0350403	0.0417936	0.0483438	0.0424058	0.0435825	0.0392534	0.0367292		0.0916063	0.0818977	0.0874152	0.104713	0.11763	0.121357	0.10919	0.102552	0.110305	0.092142	0.115833

## Sheet: Fig5S1
GMPCPP-microtubule				Taxol-microtubule
Distance (µm)	Normalized Seed Intensity	Normalized SSNA1 Intensity		Distance (µm)	Normalized Seed Intensity	Normalized SSNA1 Intensity
0	0.022826	0.0359942		0	0.495651	0.0560906
0.16	0	0.0711607		0.16	0.344678	0.0334675
0.32	0.00917175	0.0402842		0.32	0.340604	0.0385892
0.48	0.0184983	0.0218465		0.48	0.494715	0.0210275
0.64	0.0286891	0		0.64	0.511499	0.0104671
0.8	0.0703847	0.0540453		0.8	0.454982	0.0299517
0.96	0.0308998	0.0807174		0.96	0.478685	0.0290162
1.12	0.0420541	0.083598		1.12	0.46016	0
1.28	0.0425783	0.0763437		1.28	0.443721	0.0482151
1.44	0.0845179	0.0757105		1.44	0.415145	0.0432456
1.6	0.12082	0.179474		1.6	0.550623	0.0279632
1.76	0.229855	0.409817		1.76	0.480029	0.0615742
1.92	0.329528	0.682255		1.92	0.4817	0.103958
2.08	0.450176	0.766038		2.08	0.49966	0.040156
2.24	0.542995	0.772717		2.24	0.473339	0.0851947
2.4	0.779235	0.652208		2.4	0.436315	0.0903549
2.56	0.846432	0.477385		2.56	0.330314	0.110168
2.72	0.789132	0.465794		2.72	0.374632	0.0945575
2.88	0.741484	0.513024		2.88	0.444442	0.0956604
3.04	0.818346	0.467513		3.04	0.362245	0.108594
3.2	0.797174	0.408779		3.2	0.329639	0.129466
3.36	0.74306	0.317832		3.36	0.390007	0.163686
3.52	0.731719	0.254968		3.52	0.427212	0.114361
3.68	0.796298	0.264258		3.68	0.329251	0.126656
3.84	0.890799	0.287488		3.84	0.265122	0.170317
4	0.958066	0.239943		4	0.231546	0.196826
4.16	0.975874	0.302197		4.16	0.142424	0.250524
4.32	0.936149	0.319867		4.32	0.111706	0.355345
4.48	0.812351	0.309585		4.48	0.0350402	0.492594
4.64	0.781238	0.401769		4.64	0	0.724737
4.8	0.685283	0.501558		4.8	0.0477932	0.931307
4.96	0.659422	0.492272		4.96	0.061148	1
5.12	0.653275	0.556038		5.12	0.102588	0.85163
5.28	0.602199	0.586067		5.28	0.221072	0.629354
5.44	0.541843	0.509778		5.44	0.314952	0.411024
5.6	0.557104	0.460635		5.6	0.328875	0.256897
5.76	0.614471	0.473448		5.76	0.37183	0.243078
5.92	0.672148	0.542906		5.92	0.364422	0.20583
6.08	0.770711	0.541408		6.08	0.564297	0.172318
6.24	0.811597	0.620902		6.24	0.758747	0.167164
6.4	0.794624	0.738928		6.4	0.695622	0.146445
6.56	0.801552	0.954811		6.56	0.695472	0.14867
6.72	0.909817	0.769731		6.72	0.651313	0.166679
6.88	1	0.517733		6.88	0.686557	0.186973
7.04	0.968485	0.451704		7.04	0.804266	0.213741
7.2	0.805886	0.464633		7.2	0.856632	0.205372
7.36	0.745781	0.527069		7.36	0.916399	0.231867
7.52	0.68658	0.57479		7.52	0.98176	0.242854
7.68	0.62943	0.587782		7.68	1	0.240175
7.84	0.600856	0.604298		7.84	0.930972	0.213507
8	0.532159	0.71548		8	0.89842	0.231229
8.16	0.449042	0.904008		8.16	0.918289	0.252704
8.32	0.43269	1		8.32	0.948883	0.233604
8.48	0.484793	0.922249		8.48	0.988277	0.199256
8.64	0.613799	0.680323		8.64	0.893402	0.229895
8.8	0.777593	0.481928		8.8	0.713848	0.253677
8.96	0.860839	0.400992		8.96	0.691398	0.234606
9.12	0.868883	0.361139		9.12	0.680639	0.205679
9.28	0.794406	0.424366		9.28	0.599318	0.211536
9.44	0.744194	0.474399		9.44	0.675208	0.218843
9.6	0.700637	0.476014		9.6	0.740417	0.206638
9.76	0.602747	0.606072
9.92	0.584182	0.764528
10.08	0.641977	0.701475
10.24	0.686488	0.540631
10.4	0.7493	0.553512
10.56	0.810031	0.566682
10.72	0.792428	0.510323
10.88	0.689594	0.479247
11.04	0.584456	0.535363
11.2	0.374019	0.507039
11.36	0.176703	0.301069
11.52	0.1052	0.179747
11.68	0.0837559	0.150376
11.84	0.0619601	0.114712
12	0.0353809	0.0853766
12.16	0.0342337	0.0918222
12.32	0.0324386	0.0951598
12.48	0.0334576	0.114347
12.64	0.0277971	0.13423
12.8	0.0337369	0.13848
12.96	0.0510395	0.108022
13.12	0.0414662	0.0718178
13.28	0.028119	0.0580667
13.44	0.0235395	0.100123
13.6	0.019211	0.110879
