# Supplementary material for: SSNA1 stabilizes dynamic microtubules and detects microtubule damage
Source: eLife journal article supplement (doi:10.7554/elife.67282), 2021-12-31
Supplement: supp [file elife-67282-supp-v1.zip › elife_poa_e67282_Figure_6_source_data_1.xlsx]

## Sheet: 6B
SSNA-coated microtubules				Non-coated microtubules				Weighted means
normalized SSNA1 intensity (10E-3 a.u.)	error (10E-3 a.u.)	day		normalized SSNA1 intensity (10E-3 a.u.)	error (10E-3 a.u.)	day			intensity (10E-3 a.u.)	error (10E-3 a.u.)	N
398.027	25.0227	3		28.4291	20.4779	2		Day1 SSNA1-coated:	1494.47	157.955	28
628.321	44.0067	3		33.1524	10.1768	2		Day2 SSNA1-coated:	2056.3	201.244	13
644.965	25.7148	1		37.9119	5.20422	2		Day3 SSNA1-coated:	1083.64	75.6384	38
647.577	19.5559	1		39.1184	6.59124	3		Day1 non-coated:	73.7774	3.58811	8
649.188	49.7222	3		40.9129	8.00642	2		Day2 non-coated:	47.2068	2.21223	28
658.347	53.3128	3		41.0827	9.69703	2		Day3 non-coated:	82.1545	6.50336	36
683.218	42.5123	3		41.9222	8.3781	2
732.57	32.1633	3		42.3184	8.95417	2		All Days SSNA1-coated:	1290.74	77.3074	79
750.589	22.7726	3		42.8047	4.66325	2		All Days non-coated:	64.361	3.82309	72
781.112	49.2426	3		42.9761	7.26162	2
816.061	54.9629	1		43.3282	5.86765	2
864.995	48.8922	2		43.4588	3.11681	2
888.747	50.9903	3		44.7051	8.95063	2
942.787	43.1484	3		45.2588	13.9875	2
942.974	48.6661	3		45.6885	8.91771	3
1011.65	55.0111	3		46.1784	7.7259	3
1035.56	48.4748	3		46.5469	14.5886	2
1038.39	26.2763	3		46.6148	6.80136	3
1073.37	47.2234	3		46.7256	6.1754	3
1079.27	54.3708	1		47.1787	12.2086	3
1080.71	38.9575	3		47.9447	8.85471	2
1093.54	25.2816	3		49.2241	14.4878	3
1093.66	38.3692	3		49.3914	8.60071	3
1143.51	29.7044	3		50.0851	14.1118	3
1171.74	45.5963	3		50.4475	7.6478	2
1201.06	32.1422	3		50.8802	10.6423	3
1220.22	35.0341	3		51.6936	9.5719	2
1235.84	34.4023	3		52.2072	7.22268	2
1247.58	47.9297	3		52.651	7.23447	2
1269.95	75.8768	3		52.824	10.4715	2
1282.77	58.8512	3		52.8491	4.60963	2
1344.16	60.2533	3		52.8506	15.8767	3
1360.7	70.672	3		53.0393	6.93142	2
1426.09	26.019	3		53.1732	8.17427	2
1431.09	43.5616	1		53.5514	19.8279	1
1433.28	43.4632	2		53.9631	15.4631	3
1449.86	78.6418	3		54.8816	14.625	3
1502.6	117.142	1		56.0554	15.7046	2
1563.05	23.8674	1		56.3581	9.83052	3
1618.47	84.0783	1		56.4051	11.7474	2
1620.88	57.643	3		57.1653	10.4026	2
1665.02	47.3151	1		58.3467	10.3032	3
1747.33	30.223	1		60.496	17.5244	3
1819.99	54.3907	1		60.9682	14.4431	1
1828.72	65.7999	2		60.976	9.59569	3
1833.45	51.8537	1		61.6988	13.6143	3
1886.33	60.9026	3		63.1508	16.1039	3
1935.58	63.8141	3		64.708	10.193	3
1941.07	87.0019	1		64.8015	13.5125	3
2034.31	70.4939	1		66.5092	10.9693	1
2112.54	106.42	1		68.036	11.8596	2
2144.12	48.0427	3		69.4626	26.0643	3
2147.53	78.5133	2		70.8333	24.2919	1
2176.81	85.2061	1		71.1265	12.1392	3
2222.59	80.6817	2		73.3743	7.37575	3
2228.36	82.9245	1		75.9175	6.26835	1
2278.97	126.161	3		79.1113	6.00846	3
2314.26	233.505	1		81.3927	17.2983	3
2333.43	44.6327	1		82.3629	17.9926	3
2394.96	103.287	2		84.551	6.10034	3
2458.48	46.6193	1		84.7659	16.7085	3
2526.14	97.9593	2		88.5028	21.0108	1
2585.08	88.9085	3		88.9137	26.2263	1
2587.91	88.3557	2		92.7157	16.6379	1
2596.63	78.2833	2		103.624	8.07116	3
2620.6	52.1255	2		105.711	2.84452	3
2646.79	86.7148	1		106.223	11.6519	3
2737.98	85.3646	1		138.864	15.6783	3
2763.57	87.2895	2		152.595	15.0565	2
2798.91	59.8284	2		161.248	17.0345	3
2882.22	133.599	1		205.386	7.80818	3
3055.08	72.0745	1		211.473	11.6951	3
3113.04	124.223	1
3220.31	110.442	2
3220.65	66.6199	1
3597.37	85.1801	3
3622.91	105.141	1
3641.04	90.556	3
4924.33	84.6339	1

## Sheet: 6C
SSNA-coated microtubules				Non-coated microtubules				Weighted means
normalized spastin intensity (10E-2 a.u.)	error (10E-2 a.u.)	day		normalized spastin intensity (10E-2 a.u.)	error (10E-2 a.u.)	day			intensity (10E-2 a.u.)	error (10E-2 a.u.)	N
13.5168	25.4213	3		65.1289	27.3615	3		Day1 SSNA1-coated:	240.052	21.609	28
84.7695	40.6959	3		71.1275	17.8392	2		Day2 SSNA1-coated:	252.615	38.6276	13
91.4195	27.5668	1		73.4851	20.4404	3		Day3 SSNA1-coated:	217.841	26.9232	38
95.03	14.5285	3		88.8152	18.5344	2		Day1 non-coated:	229.444	33.7248	8
98.6226	30.2735	3		92.3044	22.9819	3		Day2 non-coated:	206.283	16.7946	28
103.977	17.2862	2		111.124	27.9376	3		Day3 non-coated:	245.089	32.8362	36
107.093	24.8406	3		112.293	26.4415	3
116.725	31.4752	3		118.349	37.1841	3		All Days SSNA1-coated:	234.565	16.038	79
125.078	73.0049	3		120.444	29.8316	3		All Days non-coated:	217.474	14.8522	72
126.073	20.5614	3		123.316	18.7228	3
130.184	26.2402	3		125.419	13.0414	2
138.207	27.5806	3		130.797	51.7896	2
140.649	43.0681	3		143.34	44.4983	3
153.421	16.4309	2		145.701	14.4163	2
156.46	16.714	1		164.476	29.2648	1
157.262	32.4985	3		169.28	9.09588	2
162.202	63.464	3		181.921	33.0211	2
163.164	15.5767	1		187.12	15.5414	2
165.706	29.6448	2		191.891	26.3685	2
173.962	34.4799	3		193.393	31.3717	1
179.717	33.7407	1		194.237	50.3096	1
181.082	26.4378	1		197.912	45.8164	1
184.443	28.1139	1		198.632	39.0433	2
185.051	18.9921	2		202.679	10.4886	2
190.03	44.0642	3		215.153	52.3196	2
191.475	52.5968	1		226.387	41.5007	1
194.641	41.1985	1		229.128	26.7046	2
199.683	20.922	1		233.393	27.2647	2
201.556	37.9805	1		242.028	22.7073	2
201.624	64.9793	1		248.192	19.9577	2
201.836	20.3655	2		250.104	19.1021	2
209.21	20.5283	3		250.546	47.7744	3
213.708	27.8826	3		254.782	81.3024	3
227.211	42.944	3		257.018	23.7218	2
257.852	28.426	1		268.79	35.829	3
260.373	37.9428	3		293.661	43.0572	1
268.506	43.7614	3		296.576	33.2796	1
275.778	23.8554	3		306.655	39.2181	3
276.906	28.0255	1		307.264	70.1962	3
277.451	34.6584	3		312.696	55.712	3
279.581	95.0105	3		338.987	45.8971	3
283.86	35.8531	1		339.501	47.2744	2
284.23	41.0656	2		340.724	34.1523	2
289.805	111.275	3		341.761	40.5797	3
305.908	49.0823	3		348.491	48.6226	2
310.39	40.373	1		350.25	63.1804	3
310.852	46.2992	3		350.87	17.1739	3
312.13	18.4096	2		358.644	19.1707	2
319.898	19.6214	2		368.894	44.4198	2
320.059	65.6549	1		372.059	21.6415	2
348.921	42.4246	2		379.628	24.5441	2
368.057	54.3853	3		397.164	82.5851	3
373.809	55.3177	1		412.931	36.6096	3
390.39	42.9845	1		418.612	47.2326	3
396.588	26.6717	1		432.491	48.7361	3
400.39	53.1986	3		451.532	32.9685	2
400.923	81.0671	1		478.041	57.3922	3
401.155	39.0664	3		492.219	31.9499	3
409.209	49.2754	3		492.947	63.6933	2
417.373	31.4707	2		501.991	56.0423	3
428.105	67.1479	1		712.741	133.196	3
434.326	48.1264	1		741.414	131.594	3
437.745	32.1398	1		773.544	131.398	3
460.365	53.9489	1		790.643	113.972	3
472.996	93.2699	1		804.717	109.538	1
494.211	76.8302	1		865.193	124.373	2
505.229	76.9727	1		901.163	64.9867	3
516.703	151.909	3		911.779	73.0258	3
521.932	22.4875	3		1048.33	123.718	3
565.23	36.0755	2		1080.3	86.6507	3
577.289	46.4145	3		1125.38	179.242	3
578.26	37.9488	2		1243.32	142.002	3
588.522	39.2377	2
634.679	51.266	1
658.572	219.687	3
664.744	62.5948	3
749.353	52.5343	3
753.874	40.8404	3
850.028	270.698	3

## Sheet: 6G
SSNA-coated microtubules			Non-coated microtubules
time (min)	normalized tubulin intensity (a.u.)	SEM (a.u.)	time (min)	normalized tubulin intensity (a.u.)	SEM (a.u.)
0	1	0.06887	0	1	0.043745
0.25	0.976062	0.067956	0.25	0.965259	0.045028
0.5	0.958875	0.073862	0.5	0.906337	0.040834
0.75	0.944443	0.06649	0.75	0.875916	0.036421
1	0.926301	0.07405	1	0.800518	0.034654
1.25	0.949927	0.068149	1.25	0.714226	0.033495
1.5	0.915808	0.06611	1.5	0.594378	0.029444
1.75	0.93199	0.067029	1.75	0.47754	0.035946
2	0.910153	0.068954	2	0.338645	0.039927
2.25	0.908304	0.063624	2.25	0.23476	0.033684
2.5	0.915305	0.065462	2.5	0.130774	0.027097
2.75	0.895951	0.062973	2.75	0.100539	0.020589
3	0.885706	0.061712	3	0.095644	0.016076
3.25	0.874995	0.061813	3.25	0.083178	0.011631
3.5	0.908898	0.071794	3.5	0.071089	0.010242
3.75	0.900139	0.065293	3.75	0.067727	0.007122
4	0.865706	0.063209	4	0.058018	0.006022
4.25	0.871671	0.069229	4.25	0.061282	0.00527
4.5	0.847602	0.063959	4.5	0.051167	0.004678
4.75	0.840225	0.067337	4.75	0.055608	0.004354
5	0.851083	0.073366	5	0.052231	0.004112
5.25	0.861633	0.063766	5.25	0.052162	0.003708
5.5	0.794918	0.062888	5.5	0.047806	0.003905
5.75	0.793164	0.059664	5.75	0.048186	0.00335
6	0.769836	0.062815	6	0.047478	0.003225
6.25	0.740982	0.060586	6.25	0.045441	0.003632
6.5	0.741355	0.058268	6.5	0.042694	0.003116
6.75	0.755352	0.055737	6.75	0.044128	0.003849
7	0.739478	0.056516	7	0.046419	0.003565
7.25	0.725431	0.056012	7.25	0.04519	0.003017
7.5	0.715379	0.054852	7.5	0.045058	0.002909
7.75	0.733924	0.056078	7.75	0.044701	0.002865
8	0.728394	0.055517	8	0.045647	0.002951
8.25	0.726564	0.054508	8.25	0.042036	0.002922
8.5	0.693562	0.050997	8.5	0.044771	0.002925
8.75	0.698814	0.04818	8.75	0.044082	0.002517
9	0.684512	0.051201	9	0.043552	0.00313
9.25	0.706704	0.056985	9.25	0.04727	0.002371
9.5	0.701952	0.057827	9.5	0.049119	0.003327
9.75	0.685064	0.04898	9.75	0.044748	0.003031

## Sheet: 6H
SSNA-coated microtubules				Non-coated microtubules				Weighted means
normalized tubulin intensity (a.u.)	error (a.u.)	day		normalized tubulin intensity (a.u.)	error (a.u.)	day			intensity (a.u.)	error (a.u.)	N
0.402746	0.039809	1		0.055053	0.012428	2		Day1 SSNA1-coated:	0.734898	0.056854	30
0.408639	0.013494	1		0.064968	0.007754	2		Day2 SSNA1-coated:	0.94342	0.045615	13
0.468264	0.019058	1		0.075518	0.014503	2		Day3 SSNA1-coated:	0.889726	0.032072	23
0.491349	0.021135	1		0.078451	0.017411	2		Day1 non-coated:	0.161965	0.041927	7
0.503755	0.048471	3		0.079299	0.015239	1		Day2 non-coated:	0.143264	0.022024	30
0.558741	0.046744	1		0.079913	0.029474	1		Day3 non-coated:	0.189217	0.025788	29
0.591026	0.05208	3		0.087078	0.008517	3
0.63117	0.027864	2		0.091314	0.013575	3		All Days SSNA1-coated:	0.819737	0.032433	66
0.631715	0.036472	3		0.100547	0.024046	2		All Days non-coated:	0.162782	0.015685	66
0.715704	0.074673	3		0.102352	0.019394	2
0.71852	0.036387	3		0.132296	0.02121	3
0.767593	0.068707	1		0.146513	0.028661	3
0.770351	0.08964	1		0.153904	0.024947	2
0.778578	0.066417	3		0.15433	0.035122	2
0.780707	0.046178	2		0.154406	0.03961	2
0.812569	0.040813	1		0.155996	0.028993	3
0.814549	0.045252	2		0.161167	0.023376	2
0.817008	0.035575	1		0.163647	0.036775	2
0.823958	0.028689	3		0.16515	0.026207	3
0.83801	0.050809	3		0.168217	0.026309	2
0.841549	0.049316	2		0.192794	0.021688	3
0.84856	0.072441	1		0.196647	0.031742	2
0.849866	0.101493	1		0.197822	0.068632	3
0.860232	0.047677	3		0.203835	0.030272	1
0.876332	0.060992	1		0.205465	0.030688	2
0.896009	0.090475	1		0.205505	0.027831	3
0.898765	0.022268	1		0.207356	0.042904	2
0.904911	0.080645	2		0.207539	0.021606	3
0.914635	0.054701	3		0.229632	0.032813	3
0.91509	0.08011	3		0.238198	0.036417	2
0.916271	0.066749	1		0.243776	0.030111	2
0.919477	0.051961	1		0.246404	0.022915	1
0.921359	0.026979	3		0.246516	0.022192	2
0.930542	0.048943	3		0.256039	0.059591	3
0.943398	0.031306	1		0.262205	0.03072	3
0.947236	0.046761	3		0.264462	0.03015	2
0.952762	0.0302	2		0.271179	0.029943	3
0.973719	0.038603	3		0.284559	0.026325	3
0.97516	0.026758	3		0.287192	0.03882	3
1.00116	0.037576	1		0.289521	0.08093	1
1.00653	0.022071	2		0.299288	0.043822	2
1.00781	0.065712	3		0.320057	0.047976	3
1.01362	0.033973	1		0.327679	0.026267	2
1.01589	0.045221	3		0.331777	0.039328	2
1.016	0.035718	3		0.34416	0.046403	2
1.0284	0.039478	3		0.347289	0.030855	1
1.03769	0.04365	2		0.348285	0.039849	2
1.04069	0.04127	1		0.364834	0.057671	2
1.04738	0.062631	2		0.372952	0.044628	3
1.05655	0.031762	2		0.405098	0.051519	3
1.07673	0.064471	3		0.423441	0.074656	3
1.08841	0.037245	1		0.424789	0.037685	3
1.09974	0.05296	1		0.439911	0.030792	2
1.09986	0.052485	3		0.449642	0.051411	3
1.10396	0.044276	2		0.454053	0.030592	3
1.10913	0.049848	2		0.501024	0.03974	2
1.11344	0.151699	1		0.52658	0.061802	3
1.14754	0.052383	3		0.529907	0.044745	3
1.16708	0.044543	2		0.545988	0.11356	1
1.17919	0.04055	1		0.564091	0.048561	2
1.18347	0.068321	1		0.572637	0.046905	2
1.20869	0.030929	1		0.583207	0.038529	3
1.293	0.060254	1		0.620309	0.092611	3
1.3325	0.079648	1		0.624989	0.066808	3
1.3449	0.079855	1		0.64497	0.063836	2
1.37309	0.047791	1		0.669427	0.048593	3
