# Supplementary figures and images for: SSNA1 stabilizes dynamic microtubules and detects microtubule damage
Source: eLife journal article supplement (doi:10.7554/elife.67282), 2021-12-31

**A** Tubulin SSNA1 Merge

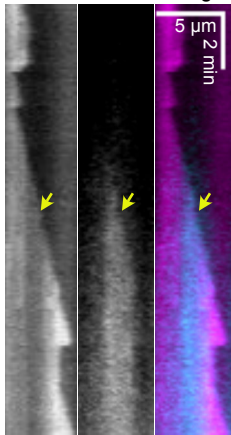

**B** Tubulin SSNA1 Merge

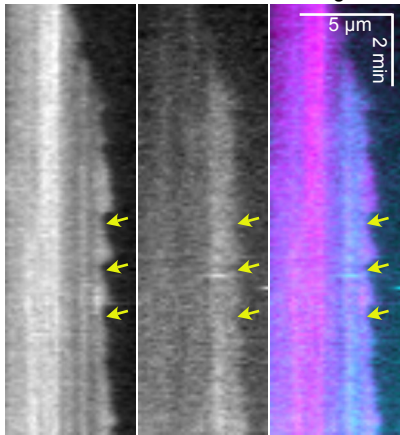

Supplement: supp [file elife-67282-supp-v1.zip]

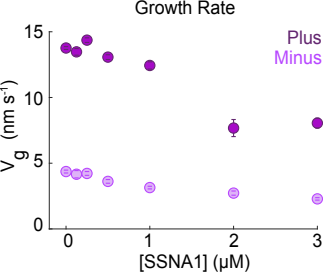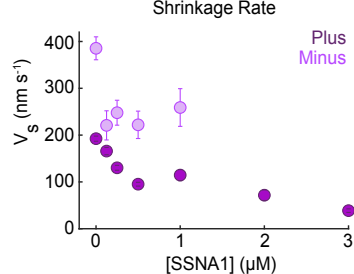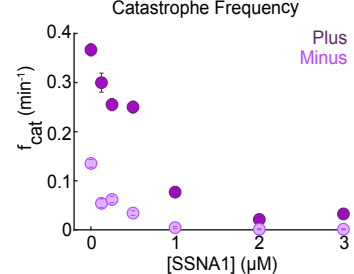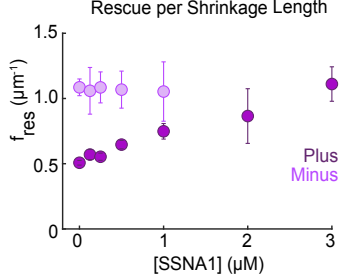

Supplement: supp [file elife-67282-supp-v1.zip]

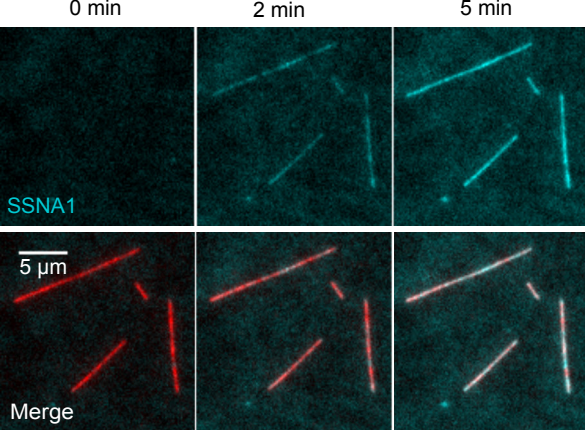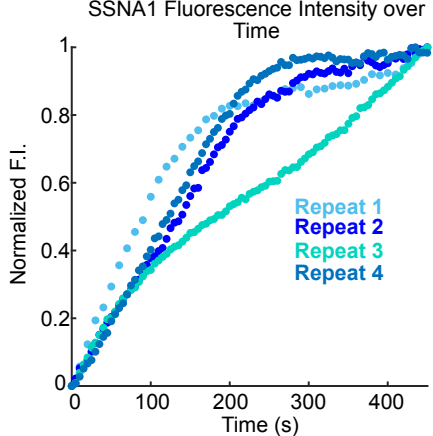

Supplement: supp [file elife-67282-supp-v1.zip]

A

3  $\mu\text{M}$   
SSNA1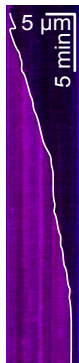

B

Microtubule End Position

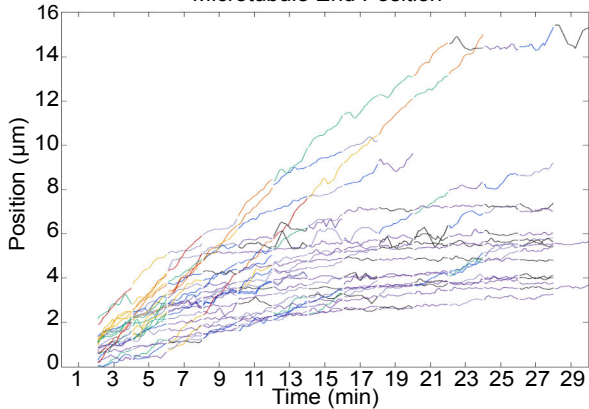

C

Microtubule End Velocity

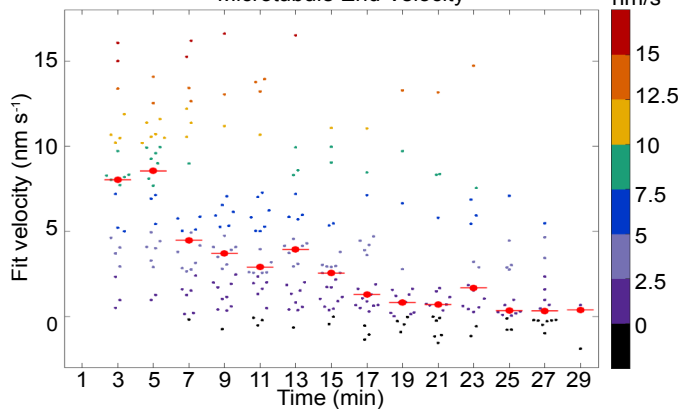

Supplement: supp [file elife-67282-supp-v1.zip]

647-SSNA1

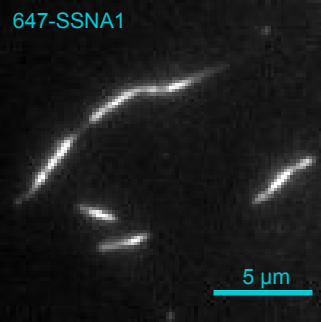

Supplement: supp [file elife-67282-supp-v1.zip › elife_poa_e67282_Figure_2_figure_supplement_2.pdf]

A

GMPCPP-  
microtubule

SSNA1

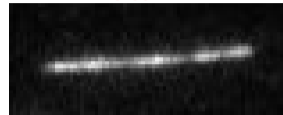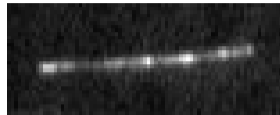

Merge

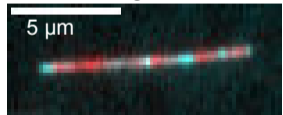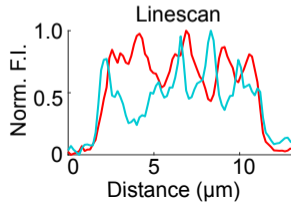

B

Taxol-microtubule

SSNA1

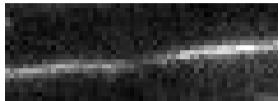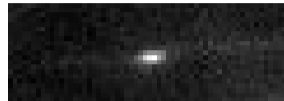

Merge

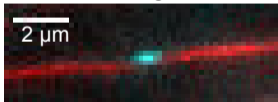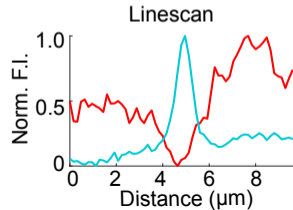

Supplement: supp [file elife-67282-supp-v1.zip › elife_poa_e67282_Figure_5_figure_supplement_1.pdf]

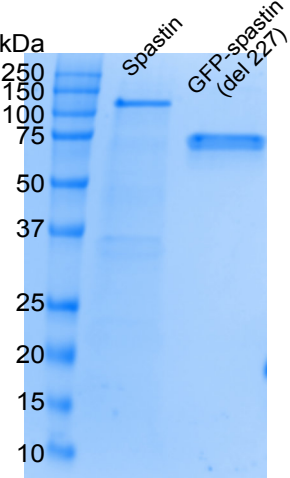

Supplement: supp [file elife-67282-supp-v1.zip › elife_poa_e67282_Figure_5_figure_supplement_2.pdf]

Control

+ SSNA1

Seeds

Seeds

SSNA1

Merge

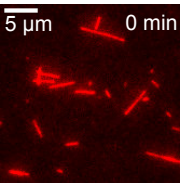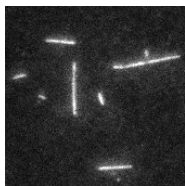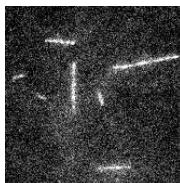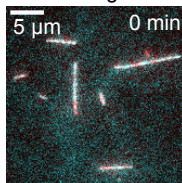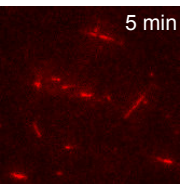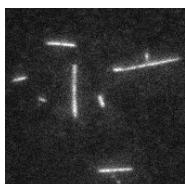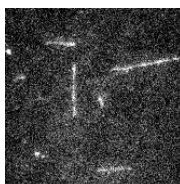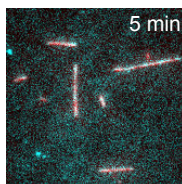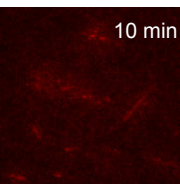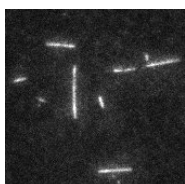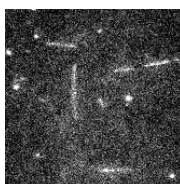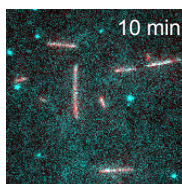

Supplement: supp [file elife-67282-supp-v1.zip › elife_poa_e67282_Figure_6_figure_supplement_1.pdf]
